# Supplementary material
Source: Research Square preprint supplement (doi:10.21203/rs.3.rs-9485642/v1)
Supplement: Supplementary file 1 [file 1c3e3f181be3fa0ba5a572ce.xlsx]

## Sheet: fig.2
The primer used in the construction of pMG36C derived genome interference or knockout plasmids
primer	sequence(5'-3')	description
F-36c-TnpB	TGACAACTTCTAATATCAATGCACTAATGG	Linearized pMG36c by PCR for TnpB cloning
R-36c-TnpB	GTGGTGCATTTCAAAATTCCTCCGAAT
F-ISLde4	GGAATTTTGAAATGCACCACATGACCGACGTTGAAAATTGGCGTG	Amplification ISLde4 protein coding sequence for ISLde4 cloning(pMG36c-ISLde4)
R-ISLde4	ATTGATATTAGAAGTTGTCACTATGCCATCACTGACTGCTTATTT
F-ISLde5	GGAATTTTGAAATGCACCACATGTCCGACTTCTTTGAAAGATACG	Amplification ISLde5 protein coding sequence for ISLde5 cloning(pMG36c-ISLde5)
R-ISLde5	ATTGATATTAGAAGTTGTCATTATGCTTCTTTTATCCGACTGACA
F-ISLde6	GGAATTTTGAAATGCACCACATGGTGTCTAATGAAGAAAAGTATGG	Amplification ISLde6 protein coding sequence for ISLde6 cloning(pMG36c-ISLde6)
R-ISLde6	ATTGATATTAGAAGTTGTCATTAGACTTCCGTCACCAGTGACGAA
F-ISLag3	GAATTTTGAAATGCACCACATGGAAACACAAGTTATCGTTAAAGT	Amplification ISLag3 protein coding sequence for ISLag3 cloning(pMG36c-ISLag3)
R-ISLag3	TTGATATTAGAAGTTGTCATTACGCATTAGTTGTTAATTCAAATT
F-ISLhe6	GAATTTTGAAATGCACCACATGCGTAAGAAAGTCGTGCC	Amplification ISLhe6 protein coding sequence for ISLhe6 cloning(pMG36c-ISLhe6)
R-ISLhe6	ATTGATATTAGAAGTTGTCATCAAATGAGAGGCGACCATTTG
F-ISLam	GAATTTTGAAATGCACCACATGAAAAGAATGAGCAGTTTAGCCT	Amplification ISLam protein coding sequence for ISLam cloning(pMG36c-ISLam)
R-ISLam	ATTGATATTAGAAGTTGTCACTAGGCTGCTTTTTTTATTTTAGGAT
F-ISLfe4	GGAATTTTGAAATGCACCACATGAAGTCAATGGCAAAAATGAAATA	Amplification ISLfe4 protein coding sequence for ISLfe4 cloning(pMG36c-ISLfe4)
R-ISLfe4	ATTGATATTAGAAGTTGTCACTAGGCTAGTTTAGCTATTCCCTTA
F-ISLru3	GAATTTTGAAATGCACCACATGTATGAAGAAAGCGAGGTGAAC	Amplification ISLru3 protein coding sequence for ISLru3 cloning(pMG36c-ISLru3)
R-ISLru3	CATTGATATTAGAAGTTGTCATTACTCACCGGCTGTTAATTTG
F-ISLhe7	GAATTTTGAAATGCACCACATGGTGCTAAAAGGGATCAAATTAAG	Amplification ISLhe7 protein coding sequence for ISLhe7 cloning(pMG36c-ISLhe7)
R-ISLhe7	ATTGATATTAGAAGTTGTCATCAGCTTGTTACCATGGCCAG
F-ISLeq	GAATTTTGAAATGCACCACATGGAAATTTCTCTAACTATTAAAGCTCGC	Amplification ISLeq protein coding sequence for ISLeq cloning(pMG36c-ISLeq)
R-ISLeq	ATTGATATTAGAAGTTGTCACTAGACTAATTTTTGATAAGTTGGCTT
F-ISLag4	GGAATTTTGAAATGCACCACATGCTACGCGTACAAAAAGTTAGAC	Amplification ISLag4 protein coding sequence for ISLag4 cloning(pMG36c-ISLag4)
R-ISLag4	ATTGATATTAGAAGTTGTCATTACAGTAAAGCAAGTAAGTTTCTCAC
F-ISLre3	GAAATGCACCACGTTCTAAAAGCTGTTAAAATGCGCATCTATCC	Amplification ISLre3 protein coding sequence for ISLre3 cloning(pMG36c-ISLre3)
R-ISLre3	ATTGATATTAGAAGTTGTCACTATCGGATAGCTAATCCTTTTTGCAAG
F-ISDra2	GGAATTTTGAAATGCACCACATGATTCGTAATAAGGCATTTGTTG	Amplification ISDra2 protein coding sequence for ISDra2 cloning(pMG36c-ISDra2)
R-ISDra2	TGCATTGATATTAGAAGTTGTCAAACAACTAAAGTAGCATG
F-36c-RNA	AGGTCTTCGACGTCGAAGACGGCCGGCATGGTCCCAGCCTCCTC	Linearized pMG36c-TnpB by PCR for ωRNA cloning
R-36c-RNA	TTGATGAATCTCTCCTCTGTCATTTATTTGG
F-RNA-ISLde4	CAGAGGAGAGATTCATCAAGAAGCATGGCGAATTCTTTGACT	Amplification ISLde4-ωRNA coding sequence for ISLde4-ωRNA cloning(pMG36c-ISLde4-ωRNA-NT)
R-RNA-ISLde4	TCTTCGACGTCGAAGACCTCCGAATTCAAAAACATATCCAATGCTATTC
F-RNA-ISLde5	AGGTCTTCGACGTCGAAGACGGCCGGCATGGTCCCAGCCTCCTC	Amplification ISLde5-ωRNA coding sequence for ISLde5-ωRNA cloning(pMG36c-ISLde5-ωRNA-NT)
R-RNA-ISLde5	GTCTTCGACGTCGAAGACCTCCGAATCATAAAACTTACTAAATCTTGATAATCAC
F-RNA-ISLde6	CAGAGGAGAGATTCATCAAGGCGAAACGGAACAATCGTCCTTAG	Amplification ISLde6-ωRNA coding sequence for ISLde6-ωRNA cloning(pMG36c-ISLde6-ωRNA-NT)
R-RNA-ISLde6	GTCTTCGACGTCGAAGACCTTTGAACCTCCTACGACTAAAG
F-RNA-ISLag3	CAGAGGAGAGATTCATCAATCCAACTATTGGGTACGCAATATATT	Amplification ISLag3-ωRNA coding sequence for ISLag3-ωRNA cloning(pMG36c-ISLag3-ωRNA-NT)
R-RNA-ISLag3	TCTTCGACGTCGAAGACCTTCAACTACCCCTCACTAAAGTGAGAGG
F-RNA-ISLhe6	CAGAGGAGAGATTCATCAAGCGTCCACTTGACAAACGAAAATAG	Amplification ISLhe6-ωRNA coding sequence for ISLhe6-ωRNA cloning(pMG36c-ISLhe6-ωRNA-NT)
R-RNA-ISLhe6	TCTTCGACGTCGAAGACCTATGTTAGAAAATATTAGGTCAATACAGTCATTTTGC
F-RNA-ISLam	CAGAGGAGAGATTCATCAAAAAGGCTGCAGTCCGTTAGC	Amplification ISLam-ωRNA coding sequence for ISLam-ωRNA cloning(pMG36c-ISLam-ωRNA-NT)
R-RNA-ISLam	TCTTCGACGTCGAAGACCTGTCAACTACCCTAGACTGAAGTCTAGGG
F-RNA-ISLfe4	CAGAGGAGAGATTCATCAATAGCTAAACTAGCCTAGCTTATCTGTCC	Amplification ISLfe4-ωRNA coding sequence for ISLfe4-ωRNA cloning(pMG36c-ISLfe4-ωRNA-NT)
R-RNA-ISLfe4	TCTTCGACGTCGAAGACCTGTCAACCACCACTGACTAAAGTCAG
F-RNA-ISLru3	CAGAGGAGAGATTCATCAACACGCAATATGTTAGTGGCAATG	Amplification ISLru3-ωRNA coding sequence for ISLru3-ωRNA cloning(pMG36c-ISLru3-ωRNA-NT)
R-RNA-ISLru3	GTCTTCGACGTCGAAGACCTGTCAACTACCACCGATTAAAATCGAT
F-RNA-ISLhe7	CAGAGGAGAGATTCATCAAGTCAAACCAAGCATGATCGAGAT	Amplification ISLhe7-ωRNA coding sequence for ISLhe7-ωRNA cloning(pMG36c-ISLhe7-ωRNA-NT)
R-RNA-ISLhe7	TCTTCGACGTCGAAGACCTATGAACTACACCGGCACTAAAGTGAC
F-RNA-ISLeq	CAGAGGAGAGATTCATCAACCAACTTATCAAAAATTAGTCTAGTGTAT	Amplification ISLeq-ωRNA coding sequence for ISLeq-ωRNA cloning(pMG36c-ISLeq-ωRNA-NT)
R-RNA-ISLeq	TCTTCGACGTCGAAGACCTAATCAACTACCTGGGAATAAATTCCCAG
F-RNA-ISLag4	CAGAGGAGAGATTCATCAATGCTTTACTGTAAAAATAAACGGGGTGGGCTACAC	Amplification ISLag4-ωRNA coding sequence for ISLag4-ωRNA cloning(pMG36c-ISLag4-ωRNA-NT)
R-RNA-ISLag4	TCTTCGACGTCGAAGACCTCCTGCTATATAAAATGTAGAATAACATAGAAAAGC
F-RNA-ISLre3	CATCAAGTAAAAAGCTTATTCAGGTCAATCCGTC	Amplification ISLre3-ωRNA coding sequence for ISLre3-ωRNA cloning(pMG36c-ISLre3-ωRNA-NT)
R-RNA-ISLre3	TGAGACCGACGTCGGTCTCTATTGAACTACTCCCACTTAGCTAAACCT
F-RNA-ISDra2	CAGAGGAGAGATTCATCAAGTGGGGAAACCCATGACCG	Amplification ISDra2-ωRNA coding sequence for ISDra2-ωRNA cloning(pMG36c-ISDra2-ωRNA-NT)
R-RNA-ISDra2	GTCTTCGACGTCGAAGACCTTTGAACCTCACACGACTAAAG
F-ISLde4-T	TGCGCATACTGCAGCTAATTGGCCGGCATGGTCCCAGCCTCCTC	Linearized pMG36c-ωRNA-ISLde4 by PCR for Target cloning(pMG36c-ISLde4-ωRNA-T)
R-ISLde4-T	ATTAGCTGCAGTATGCGCACCGAATTCAAAAACATATCCAATGCTATTC
F-ISLde5-T	CTAGATTTTCGCGATTTACCGGCCGGCATGGTCCCAGCCTCCTC	Linearized pMG36c-ωRNA-ISLde5 by PCR for Target cloning(pMG36c-ISLde5-ωRNA-T)
R-ISLde5-T	GGTAAATCGCGAAAATCTAGCCGAATCATAAAACTTACTAAATCTTGATAATCAC
F-ISLde6-T	TTGCGCATGGATATAGTTAAGGCCGGCATGGTCCCAGCCTCCTC	Linearized pMG36c-ωRNA-ISLde6 by PCR for Target cloning(pMG36c-ISLde6-ωRNA-T)
R-ISLde6-T	TTAACTATATCCATGCGCAATTGAACCTCCTACGACTAAAGTCGC
F-ISLag3-T	GACGACCAATAATAGTATCAGGCCGGCATGGTCCCAGCCTCCTC	Linearized pMG36c-ωRNA-ISLag3 by PCR for Target cloning(pMG36c-ISLag3-ωRNA-T)
R-ISLag3-T	TGATACTATTATTGGTCGTCTCAACTACCCCTCACTAAAGTGAGAGG
F-ISLhe6-T	GTTAACTTCGATAGTTGGCAGGCCGGCATGGTCCCAGCCTCCTC	Linearized pMG36c-ωRNA-ISLhe6 by PCR for Target cloning(pMG36c-ISLhe6-ωRNA-T)
R-ISLhe6-T	TGCCAACTATCGAAGTTAACATGTTAGAAAATATTAGGTCAATACAGTCATTTTGC
F-ISLam-T	CAAAGTGACGTGGCAGTTTAGGCCGGCATGGTCCCAGCCTCCTC	Linearized pMG36c-ωRNA-ISLam by PCR for Target cloning(pMG36c-ISLam-ωRNA-T)
R-ISLam-T	TAAACTGCCACGTCACTTTGGTCAACTACCCTAGACTGAAGTCTAGGG
F-ISLfe4-T	CAAAGTGACGTGGCAGTTTAGGCCGGCATGGTCCCAGCCTCCTC	Linearized pMG36c-ωRNA-ISLfe4 by PCR for Target cloning(pMG36c-ISLfe4-ωRNA-T)
R-ISLfe4-T	TAAACTGCCACGTCACTTTGGTCAACCACCACTGACTAAAGTCAG
F-ISLru3-T	TGATACTATTATTGGTCGTCGTCAACTACCACCGATTAAAATCGAT	Linearized pMG36c-ωRNA-ISLru3 by PCR for Target cloning(pMG36c-ISLru3-ωRNA-T)
R-ISLru3-T	GACGACCAATAATAGTATCAGGCCGGCATGGTCCCAGCCTCCTC
F-ISLhe7-T	GATGAATATTAAGGACAATCGGCCGGCATGGTCCCAGCCTCCTC	Linearized pMG36c-ωRNA-ISLhe7 by PCR for Target cloning(pMG36c-ISLhe7-ωRNA-T)
R-ISLhe7-T	GATTGTCCTTAATATTCATCATGAACTACACCGGCACTAAAGT
F-ISLeq-T	GACGACCAATAATAGTATCAGGCCGGCATGGTCCCAGCCTCCTC	Linearized pMG36c-ωRNA-ISLeq by PCR for Target cloning(pMG36c-ISLeq-ωRNA-T)
R-ISLeq-T	TGATACTATTATTGGTCGTCAATCAACTACCTGGGAATAAATTCCCAG
F-ISLag4-T	GTTAAACGAAAATAATAACGGGCCGGCATGGTCCCAGCCTCCTC	Linearized pMG36c-ωRNA-ISLag4 by PCR for Target cloning(pMG36c-ISLag4-ωRNA-T)
R-ISLag4-T	CGTTATTATTTTCGTTTAACCCTGCTATATAAAATGTAGAATAACATAGAAAAGC
F-ISLre3-T	GATTGTCCTTAATATTCATCTTGAACTACTCCCACTTAGCTAAACCT	Linearized pMG36c-ωRNA-ISLre3 by PCR for Target cloning(pMG36c-ISLre3-ωRNA-T)
R-ISLre3-T	TGAGACCGACGTCGGTCTCTATTGAACTACTCCCACTTAGCTAAACCT
F-ISDra2-T	GCATGGATATAGTTAAGGCCGGCATGGTCCCAGCCTCCTC	Linearized pMG36c-ωRNA-ISDra2 by PCR for Target cloning(pMG36c-ISDra2-ωRNA-T)
R-ISDra2-T	TTAACTATATCCATGCGCAATTGAACCTCACACGACTAAAGTCG
F-Lr-ISLde6-T1	GCGTTCCCTAAAACACCAGCGGCCGGCATGGTCCCAGCCTCCTC	Linearized pMG36c-ωRNA-ISLde6 by PCR for Target lacZ-T1 cloning(pMG36c-ISLde6-ωRNA-T1)
R-Lr-ISLde6-T1	GCTGGTGTTTTAGGGAACGCTTGAACCTCCTACGACTAAAGTCGC
F-Lr-ISLde6-T2	ATCGTTCTTGCAACTTCAACGGCCGGCATGGTCCCAGCCTCCTC	Linearized pMG36c-ωRNA-ISLde6-by PCR for Target lacZ-T2 cloning(pMG36c-ISLde6-ωRNA-T2)
R-Lr-ISLde6-T2	GTTGAAGTTGCAAGAACGATTTGAACCTCCTACGACTAAAGTCGC
F-RA-lacZ LR	CTGCAGGCATGCAAGCTTTG	Linearized pMG36c-ISLde6-ωRNA by PCR for homology arm cloning
F-RA-lacZ LR	TCTAGAGTCCCATTCGCCATGCCGAAG
F-L lacZ	GGCATGGCGAATGGGACTCTAGACACTTGAGGTTTTACACATGGCTAC	Amplification L homology arm for lacZ knockout(pMG36c-ISLde6-lacZ-T-LR)
R-L lacZ	GATTTTGATATCGTTCTTGCCGTTAGTTAAAGAGCCAACAGAACT
F-R lacZ	TGTTGGCTCTTTAACTAACGGCAAGAACGATATCAAAATCAGCAG	Amplification R homology arm for lacZ knockout(pMG36c-ISLde6-lacZ-T-LR)
R-R lacZ	CAAAGCTTGCATGCCTGCAGTCCTTGCTGTGCGACCAATG
The primer used in the construction of pMG36E derived genome knockout plasmids
primer	sequence(5'-3')	description
F-36c-TnpB	ATTCGGAGGAATTTTGAAATGCACCAC	Linearized pMG36e by PCR for ISLde6 cloning
R-36c-TnpB	TGACAACTTCTAATATCAATGCACTAATGG
F-ISLde6	GGAATTTTGAAATGCACCACATGGTGTCTAATGAAGAAAAGTATGG	Amplification ISLde6 protein coding sequence for ISLde6 cloning(pMG36e-ISLde6)
R-ISLde6	ATTGATATTAGAAGTTGTCATTAGACTTCCGTCACCAGTGACGAA
F-RNA-ISLde6	CAGAGGAGAGATTCATCAAGGCGAAACGGAACAATCGTCCTTAG	Amplification ISLde6-ωRNA coding sequence for ISLde6-ωRNA cloning(pMG36e-ISLde6-ωRNA-NT)
R-RNA-ISLde6	GTCTTCGACGTCGAAGACCTTTGAACCTCCTACGACTAAAGTCGCAG
F-LL-ISLde6-T1	CAGGTTCTGAATAACTTATAGGCCGGCATGGTCCCAGCCTCCTC	Linearized pMG36e-ωRNA-ISLde6 by PCR for Target nisinRK-T1 cloning(pMG36e-ISLde6-ωRNA-T1)
R-LL-ISLde6-T1	TATAAGTTATTCAGAACCTGTTGAACCTCCTACGACTAAAGTCGCAG
F-LL-ISLde6-T2	TCCTCTTGTTCAGGAAAAGTGGCCGGCATGGTCCCAGCCTCCTC	Linearized pMG36e-ωRNA-ISLde6 by PCR for Target nisinRK-T1 cloning(pMG36e-ISLde6-ωRNA-T2)
R-LL-ISLde6-T2	ACTTTTCCTGAACAAGAGGATTGAACCTCCTACGACTAAAGTCGCAG
F-RA-nisinRK LR	CTAGAGGATCGATCCCCGG	Linearized pMG36e-ISLde6-ωRNA by PCR for homology arm cloning
F-RA-nisinRK LR	GTACCCCGGCGCTACGATAT
F-L nisin RK	CCCGGGGATCGATCCTCTAGAAGAGCTGCGGATGATGG	Amplification L homology arm for nisinRK knockout(pMG36e-ISLde6-nisinRK-T-LR)
R-L nisin RK	CCTTAGAGATTACTAAATCAATTTTTAGTCTTTCTTTTCAATATACC
F-R nisin RK	TGATTTAGTAATCTCTAAGGATTACTTTTTTTGTT	Amplification R homology arm for nisinRK knockout(pMG36e-ISLde6-nisinRK-T-LR)
R-R nisin RK	ATATCGTAGCGCCGGGGTACAATTTCCAGCTTGCTCCTCTGA
The primer used in the construction of pSMC derived genome knockout plasmids
primer	sequence(5'-3')	description
F-SMC-TnpB	TCTCTTCTCGAGTCATGTAATTAGTTATG	Linearized pSMC by PCR for TnpB cloning
R-SMC-TnpB	TTTTTTGGAGGCATTTTGTAATTAAAACTTAGATTAG
F-SC-RNA	AGGTCTTCGACGTCGAAGACGGCCGGCATGGTCCCAGCCTCCTC	Linearized pSMC-TnpB by PCR for ωRNA cloning
R-SC-RNA	GATCATTTATCTTTCACTGCGGAGAAG
F-SC-ISLfe4	TACAAAATGCCTCCAAAAAAGAAGAGAAAGGTCATG	Amplification ISLfe4 protein coding sequence for ISLfe4 cloning(pSMC-ISLfe4)
R-SC-ISLfe4	TACATGACTCGAGAAGAGATCACACCTTCCTCTTCTTCTTG
F-SC-RNA-ISLfe4	GCAGTGAAAGATAAATGATCTAGCTAAACTAGCCTAGCTTATCTG	Amplification ISLfe4-ωRNA coding sequence for ISLfe4-ωRNA cloning(pSMC-ISLfe4-ωRNA)
R-SC-RNA-ISLfe4	GTCTTCGACGTCGAAGACCTGTCAACCACCACTGACTAAAG
F-SC-ISLfe4-T1	TTTGGGATGTTTTACTTGAAGGCCGGCATGGTCCCAGCCTCCTC	Linearized pSMC-ISLfe4-ωRNA by PCR for Target1 cloning(pSMC-ISLfe4-T1)
R-SC-ISLfe4-T1	CCTTCAAGTAAAACATCCCAAAGTCAACCACCACTGACTAAAGTC
F-SC-ISLfe4-T2	TCAAAAATGGTATAGCAGTTGGCCGGCATGGTCCCAGCCTCCTC	Linearized pSMC-ISLfe4-ωRNA by PCR for Target2 cloning(pSMC-ISLfe4-T2)
R-SC-ISLfe4-T2	CAACTGCTATACCATTTTTGAGTCAACCACCACTGACTAAAGTC
F-SC-ISLfe4-T3	AAGATTTTGGCGTTCCATTTGGCCGGCATGGTCCCAGCCTCCTC	Linearized pSMC-ISLfe4-ωRNA by PCR for Target3 cloning(pSMC-ISLfe4-T3)
R-SC-ISLfe4-T3	CAAATGGAACGCCAAAATCTTGTCAACCACCACTGACTAAAGTC
F-SC-ISLfe4-T4	AACCGCACATGCGGCAGACAGGCCGGCATGGTCCCAGCCTCCTC	Linearized pSMC-ISLfe4-ωRNA by PCR for Target4 cloning(pSMC-ISLfe4-T4)
R-SC-ISLfe4-T4	TGTCTGCCGCATGTGCGGTTGTCAACCACCACTGACTAAAGTC
F-SC-ISLfe4-T5	TTCCACGCTTGCTTGCGGAAGGCCGGCATGGTCCCAGCCTCCTC	Linearized pSMC-ISLfe4-ωRNA by PCR for Target5 cloning(pSMC-ISLfe4-T5)
R-SC-ISLfe4-T5	TTCCGCAAGCAAGCGTGGAAGTCAACCACCACTGACTAAAGTC
F-SC-ISLde6	TTACAAAATGCCTCCAAAAAAGAAGAGAAAGGTCGTTTC	Amplification ISLde6 protein coding sequence for ISLde6 cloning(pSMC-ISLde6)
R-SC-ISLde6	TTACATGACTCGAGAAGAGATCACACCTTCCTCTTCTTCTTGG
F-SC-RNA-ISde6	GCAGTGAAAGATAAATGATCGGCGAAACGGAACAATCGTCCTTAG	Amplification ISLde6-ωRNA coding sequence for ISLde6-ωRNA cloning(pSMC-ISLde6-ωRNA)
R-SC-RNA-ISde6	GTCTTCGACGTCGAAGACCTTTGAACCTCCTACGACTAAAGTC
F-SC-ISLde6-T1	CTCAAATGAGCTTCAAATTGGGCCGGCATGGTCCCAGCCTCCTC	Linearized pSMC-ISLde6-ωRNA by PCR for Target1 cloning(pSMC-ISLde6-T1)
R-SC-ISLde6-T1	CAATTTGAAGCTCATTTGAGTTGAACCTCCTACGACTAAAGTC
F-SC-ISLde6-T2	TAAATGCTCTTTTTGAATATGGCCGGCATGGTCCCAGCCTCCTC	Linearized pSMC-ISLde6-ωRNA by PCR for Target2 cloning(pSMC-ISLde6-T2)
R-SC-ISLde6-T2	ATATTCAAAAAGAGCATTTATTGAACCTCCTACGACTAAAGTCGC
F-SC-ISLde6-T3	TGCATTTTCTGCCAACAACTGGCCGGCATGGTCCCAGCCTCCTC	Linearized pSMC-ISLde6-ωRNA by PCR for Target3 cloning(pSMC-ISLde6-T3)
R-SC-ISLde6-T3	AGTTGTTGGCAGAAAATGCATTGAACCTCCTACGACTAAAGTCGC
F-SC-ISLde6-T4	GCTTGCGTCACTTCTCAATTGGCCGGCATGGTCCCAGCCTCCTC	Linearized pSMC-ISLde6-ωRNA by PCR for Target4 cloning(pSMC-ISLde6-T4)
R-SC-ISLde6-T4	AATTGAGAAGTGACGCAAGCTTGAACCTCCTACGACTAAAGTCGC
F-SC-ISLde6-T5	TGGAATATCAGTTCTACCTGGGCCGGCATGGTCCCAGCCTCCTC	Linearized pSMC-ISLde6-ωRNA by PCR for Target5 cloning(pSMC-ISLde6-T5)
R-SC-ISLde6-T5	CAGGTAGAACTGATATTCCATTGAACCTCCTACGACTAAAGTCGCA
F-SC-ISLam	TTACAAAATGCCTCCAAAAAAGAAGAGAAAG	Amplification ISLam protein coding sequence for ISLam cloning(pSMC-ISLam)
F-SC-ISLam	CAATGACTCGAGGTCCAAAATCACACCTTCCTCTTCTTCTTGG
F-SC-RNA-ISLam	GCAGTGAAAGATAAATGATCAAAGGCTGCAGTCCGTTAG	Amplification ISLam-ωRNA coding sequence for ISLam-ωRNA cloning(pSMC- ISLam-ωRNA)
R-SC-RNA-ISLam	GTCTTCGACGTCGAAGACCTGTCAACTACCCTAGACTGAAGTC
F-SC-ISLam-T1	TCAAAAATGGTATAGCAGTTGGCCGGCATGGTCCCAGCCTCCTC	Linearized pSMC-ISLam-ωRNA by PCR for Target1 cloning(pSMC-ISLam-T1)
R-SC-ISLam-T1	AACTGCTATACCATTTTTGAGTCAACTACCCTAGACTGAAGTC
F-SC-ISLam-T2	TTTGGGATGTTTTACTTGAAGGCCGGCATGGTCCCAGCCTCCTC	Linearized pSMC-ISLam-ωRNA by PCR for Target2 cloning(pSMC-ISLam-T2)
R-SC-ISLam-T2	TTCAAGTAAAACATCCCAAAGTCAACTACCCTAGACTGAAGTCTAG
F-SC-ISLam-T3	AACCGCACATGCGGCAGACAGGCCGGCATGGTCCCAGCCTCCTC	Linearized pSMC-ISLam-ωRNA by PCR for Target3 cloning(pSMC-ISLam-T3)
R-SC-ISLam-T3	TGTCTGCCGCATGTGCGGTTGTCAACTACCCTAGACTGAAGTCTAG
F-SC-ISLam-T4	AAGATTTTGGCGTTCCATTTGGCCGGCATGGTCCCAGCCTCCTC	Linearized pSMC-ISLam-ωRNA by PCR for Target4 cloning(pSMC-ISLam-T4)
R-SC-ISLam-T4	AAATGGAACGCCAAAATCTTGTCAACTACCCTAGACTGAAGTCTAG
F-SC-ISLam-T5	TTCCACGCTTGCTTGCGGAAGGCCGGCATGGTCCCAGCCTCCTC	Linearized pSMC-ISLam-ωRNA by PCR for Target5 cloning(pSMC-ISLam-T5)
R-SC-ISLam-T5	TTCCGCAAGCAAGCGTGGAAGTCAACTACCCTAGACTGAAGTCTAG
F-SC-ISLhe7	AATTACAAAATGCCTCCAAAAAAGAAGAGAAAGGTCATGG	Amplification ISLhe7 protein coding sequence for ISLam cloning(pSMC-ISLhe7)
R-SC-ISLhe7	TTACATGACTCGAGAAGAGATCACACCTTCCTCTTCTTCTTGG
F-SC-RNA-ISLhe7	CGCAGTGAAAGATAAATGATCGTCAAACCAAGCATGATCGAGAT	Amplification ISLhe7-ωRNA coding sequence for ISLhe7-ωRNA cloning(pSMC- ISLhe7-ωRNA)
R-SC-RNA-ISLhe7	GTCTTCGACGTCGAAGACCTATGAACTACACCGGCACTAAAG
F-SC-ISLhe7-T1	CTTTTGTATGTTTGTCTCCAGGCCGGCATGGTCCCAGCCTCCTC	Linearized pSMC-ISLhe7-ωRNA by PCR for Target1 cloning(pSMC-ISLhe7-T1)
R-SC-ISLhe7-T1	TGGAGACAAACATACAAAAGATGAACTACACCGGCACTAAAG
F-SC-ISLhe7-T2	GTGACCTACTTTTCTGTTAGGGCCGGCATGGTCCCAGCCTCCTC	Linearized pSMC-ISLhe7-ωRNA by PCR for Target2 cloning(pSMC-ISLhe7-T2)
R-SC-ISLhe7-T2	CTAACAGAAAAGTAGGTCACATGAACTACACCGGCACTAAAG
F-SC-ISLhe7-T3	TAAAGCAAGAAGAAGAAGTTGGCCGGCATGGTCCCAGCCTCCTC	Linearized pSMC-ISLhe7-ωRNA by PCR for Target3 cloning(pSMC-ISLhe7-T3)
R-SC-ISLhe7-T3	AACTTCTTCTTCTTGCTTTAATGAACTACACCGGCACTAAAG
F-SC-ISLhe7-T4	TGATATACTTGTACAGCAAAGGCCGGCATGGTCCCAGCCTCCTC	Linearized pSMC-ISLhe7-ωRNA by PCR for Target4 cloning(pSMC-ISLhe7-T4)
R-SC-ISLhe7-T4	TTTGCTGTACAAGTATATCAATGAACTACACCGGCACTAAAG
F-SC-ISLhe7-T5	ACATGAAATGCTCCATAATAGGCCGGCATGGTCCCAGCCTCCTC	Linearized pSMC-ISLhe7-ωRNA by PCR for Target5 cloning(pSMC-ISLhe7-T5)
R-SC-ISLhe7-T5	TATTATGGAGCATTTCATGTATGAACTACACCGGCACTAAAG
F-SC-ISDra2	TTACAAAATGCCTCCAAAAAAGAAGAGAAAGGTCATG	Amplification ISDra2 protein coding sequence for ISDra2 cloning(pSMC-ISDra2)
R-SC-ISDra2	TTACATGACTCGAGAAGAGATCAAACCTTTCTCTTCTTCTTTGG
F-SC-RNA-ISDra2	GCAGTGAAAGATAAATGATCGTGGGGAAACCCATGACCG	Amplification ISDra2-ωRNA coding sequence for ISDra2-ωRNA cloning(pSMC-ISDra2-ωRNA)
R-SC-RNA-ISDra2	GTCTTCGACGTCGAAGACCTTTGAACCTCACACGACTAAAGTCGC
F-SC-ISDra2-T1	CTCAAATGAGCTTCAAATTGGGCCGGCATGGTCCCAGCCTCCTC	Linearized pSMC-ISDra2-ωRNA by PCR for Target1 cloning(pSMC-ISDra2-T1)
R-SC-ISDra2-T1	CAATTTGAAGCTCATTTGAGTTGAACCTCACACGACTAAAGTCGC
F-SC-ISDra2-T2	TAAATGCTCTTTTTGAATATGGCCGGCATGGTCCCAGCCTCCTC	Linearized pSMC-ISDra2-ωRNA by PCR for Target2 cloning(pSMC-ISDra2-T2)
R-SC-ISDra2-T2	ATATTCAAAAAGAGCATTTATTGAACCTCACACGACTAAAGTCGC
F-SC-ISDra2-T3	TGCATTTTCTGCCAACAACTGGCCGGCATGGTCCCAGCCTCCTC	Linearized pSMC-ISDra2-ωRNA by PCR for Target3 cloning(pSMC-ISDra2-T3)
R-SC-ISDra2-T3	AGTTGTTGGCAGAAAATGCATTGAACCTCACACGACTAAAGTCGC
F-SC-ISDra2-T4	GCTTGCGTCACTTCTCAATTGGCCGGCATGGTCCCAGCCTCCTC	Linearized pSMC-ISDra2-ωRNA by PCR for Target4 cloning(pSMC-ISDra2-T4)
R-SC-ISDra2-T4	AATTGAGAAGTGACGCAAGCTTGAACCTCACACGACTAAAGTCGC
F-SC-ISDra2-T5	TGGAATATCAGTTCTACCTGGGCCGGCATGGTCCCAGCCTCCTC	Linearized pSMC-ISDra2-ωRNA by PCR for Target5 cloning(pSMC-ISDra2-T5)
R-SC-ISDra2-T5	CAGGTAGAACTGATATTCCATTGAACCTCACACGACTAAAGTCGC

## Sheet: fig. 3
Primers used for the construction of TnpB in vitro cleavage plasmids.
F-19-Target	GATGAATATTAAGGACAATCATCCTCTAGAGTCGACCTGC	Linearized pUC19 by PCR for Target cloning(pUC19-Target)
R-19-Target	GATTGTCCTTAATATTCATCTTCACTGGCCGTCGTTTTACAACG
F-19-TTGAT-Target	GATGAATATTAAGGACAATCATCCTCTAGAGTCGACCTGCAG	Linearized pUC19 by PCR for TTGAT-Target cloning(pUC19-TTGAT-Target)
R-19-TTGAT-Target	TGTCCTTAATATTCATCATCAATTCACTGGCCGTCGTTTTAC
F-19-TTTAA-Target	GATGAATATTAAGGACAATCATCCTCTAGAGTCGACCTGC	Linearized pUC19 by PCR for TTTAA-Target cloning(pUC19-TTTAA-Target)
R-19-TTTAA-Target	GATTGTCCTTAATATTCATCTTAAATTCACTGGCCGTCGTTTTAC
F-19-TTGAT-T-Mis1-2	CTTGAATATTAAGGACAATCATCCTCTAGAGTCGACCTGCAG	Linearized pUC19-TTGAT-Target by PCR for Target-Mis1-2 cloning(pUC19-TTGAT-T-Mis1-2)
R-19-TTGAT-T-Mis1-2	TGTCCTTAATATTCAAGATCAATTCACTGGCCGTCGTTTTAC
F-19-TTGAT-T-Mis3-4	GAACAATATTAAGGACAATCATCCTCTAGAGTCGACCTGCAG	Linearized pUC19-TTGAT-Target by PCR for Target-Mis3-4 cloning(pUC19-TTGAT-T-Mis3-4)
R-19-TTGAT-T-Mis3-4	TGTCCTTAATATTGTTCATCAATTCACTGGCCGTCGTTTTAC
F-19-TTGAT-T-Mis5-6	GATGTTTATTAAGGACAATCATCCTCTAGAGTCGACCTGCAG	Linearized pUC19-TTGAT-Target by PCR for Target-Mis5-6 cloning(pUC19-TTGAT-T-Mis5-6)
R-19-TTGAT-T-Mis5-6	TGTCCTTAATAAACATCATCAATTCACTGGCCGTCGTTTTAC
F-19-TTGAT-T-Mis7-8	GATGAAATTTAAGGACAATCATCCTCTAGAGTCGACCTGCAG	Linearized pUC19-TTGAT-Target by PCR for Target-Mis7-8 cloning(pUC19-TTGAT-T-Mis7-8)
R-19-TTGAT-T-Mis7-8	TGTCCTTAAATTTCATCATCAATTCACTGGCCGTCGTTTTAC
F-19-TTGAT-T-Mis9-10	GATGAATAAAAAGGACAATCATCCTCTAGAGTCGACCTGCAG	Linearized pUC19-TTGAT-Target by PCR for Target-Mis9-10 cloning(pUC19-TTGAT-T-Mis9-10)
R-19-TTGAT-T-Mis9-10	TGTCCTTTTTATTCATCATCAATTCACTGGCCGTCGTTTTAC
F-19-TTGAT-T-Mis11-12	GATGAATATTTTGGACAATCATCCTCTAGAGTCGACCTGCAG	Linearized pUC19-TTGAT-Target by PCR for Target-Mis11-12 cloning(pUC19-TTGAT-T-Mis11-12)
R-19-TTGAT-T-Mis11-12	TGTCCAAAATATTCATCATCAATTCACTGGCCGTCGTTTTAC
F-19-TTGAT-T-Mis13-14	GATGAATATTAACCACAATCATCCTCTAGAGTCGACCTGCAG	Linearized pUC19-TTGAT-Target by PCR for Target-Mis13-14 cloning(pUC19-TTGAT-T-Mis13-14)
R-19-TTGAT-T-Mis13-14	TGTGGTTAATATTCATCATCAATTCACTGGCCGTCGTTTTAC
F-19-TTGAT-T-Mis15-16	GATGAATATTAAGGTGAATCATCCTCTAGAGTCGACCTGCAG	Linearized pUC19-TTGAT-Target by PCR for Target-Mis15-16 cloning(pUC19-TTGAT-T-Mis15-16)
R-19-TTGAT-T-Mis15-16	TCACCTTAATATTCATCATCAATTCACTGGCCGTCGTTTTAC
F-19-TTGAT-T-Mis17-18	GATGAATATTAAGGACTTTCATCCTCTAGAGTCGACCTGCAG	Linearized pUC19-TTGAT-Target by PCR for Target-Mis17-18 cloning(pUC19-TTGAT-T-Mis17-18)
R-19-TTGAT-T-Mis17-18	AGTCCTTAATATTCATCATCAATTCACTGGCCGTCGTTTTAC
F-19-TTGAT-T-Mis19-20	GATGAATATTAAGGACAAAGATCCTCTAGAGTCGACCTGCAG	Linearized pUC19-TTGAT-Target by PCR for Target-Mis19-20 cloning(pUC19-TTGAT-T-Mis19-20)
R-19-TTGAT-T-Mis19-20	TGTCCTTAATATTCATCATCAATTCACTGGCCGTCGTTTTAC
F-19-TTTAA-T-Mis1-2	CTTGAATATTAAGGACAATCATCCTCTAGAGTCGACCTGC	Linearized pUC19-TTTAA-Target by PCR for Target-Mis1-2 cloning(pUC19-TTTAA-T-Mis1-2)
R-19-TTTAA-T-Mis1-2	TGTCCTTAATATTCAAGTTAAATTCACTGGCCGTCGTTTTAC
F-19-TTTAA-T-Mis3-4	GAACAATATTAAGGACAATCATCCTCTAGAGTCGACCTGC	Linearized pUC19-TTTAA-Target by PCR for Target-Mis3-4 cloning(pUC19-TTTAA-T-Mis3-4)
R-19-TTTAA-T-Mis3-4	TGTCCTTAATATTGTTCTTAAATTCACTGGCCGTCGTTTTAC
F-19-TTTAA-T-Mis5-6	GATGTTTATTAAGGACAATCATCCTCTAGAGTCGACCTGC	Linearized pUC19-TTTAA-Target by PCR for Target-Mis5-6 cloning(pUC19-TTTAA-T-Mis5-6)
R-19-TTTAA-T-Mis5-6	TGTCCTTAATAAACATCTTAAATTCACTGGCCGTCGTTTTAC
F-19-TTTAA-T-Mis7-8	GATGAAATTTAAGGACAATCATCCTCTAGAGTCGACCTGC	Linearized pUC19-TTTAA-Target by PCR for Target-Mis7-8 cloning(pUC19-TTTAA-T-Mis7-8)
R-19-TTTAA-T-Mis7-8	TGTCCTTAAATTTCATCTTAAATTCACTGGCCGTCGTTTTAC
F-19-TTTAA-T-Mis9-10	GATGAATAAAAAGGACAATCATCCTCTAGAGTCGACCTGC	Linearized pUC19-TTTAA-Target by PCR for Target-Mis9-10 cloning(pUC19-TTTAA-T-Mis9-10)
R-19-TTTAA-T-Mis9-10	TGTCCTTTTTATTCATCTTAAATTCACTGGCCGTCGTTTTAC
F-19-TTTAA-T-Mis11-12	GATGAATATTTTGGACAATCATCCTCTAGAGTCGACCTGC	Linearized pUC19-TTTAA-Target by PCR for Target-Mis11-12 cloning(pUC19-TTTAA-T-Mis11-12)
R-19-TTTAA-T-Mis11-12	TGTCCAAAATATTCATCTTAAATTCACTGGCCGTCGTTTTAC
F-19-TTTAA-T-Mis13-14	GATGAATATTAACCACAATCATCCTCTAGAGTCGACCTGC	Linearized pUC19-TTTAA-Target by PCR for Target-Mis13-14 cloning(pUC19-TTTAA-T-Mis13-14)
R-19-TTTAA-T-Mis13-14	TGTGGTTAATATTCATCTTAAATTCACTGGCCGTCGTTTTAC
F-19-TTTAA-T-Mis15-16	GATGAATATTAAGGTGAATCATCCTCTAGAGTCGACCTGC	Linearized pUC19-TTTAA-Target by PCR for Target-Mis15-16 cloning(pUC19-TTTAA-T-Mis15-16)
R-19-TTTAA-T-Mis15-16	TCACCTTAATATTCATCTTAAATTCACTGGCCGTCGTTTTAC
F-19-TTTAA-T-Mis17-18	GATGAATATTAAGGACTATCATCCTCTAGAGTCGACCTGC	Linearized pUC19-TTTAA-Target by PCR for Target-Mis17-18 cloning(pUC19-TTTAA-T-Mis17-18)
R-19-TTTAA-T-Mis17-18	AGTCCTTAATATTCATCTTAAATTCACTGGCCGTCGTTTTAC
F-19-TTTAA-T-Mis19-20	GATGAATATTAAGGACAAAGATCCTCTAGAGTCGACCTGC	Linearized pUC19-TTTAA-Target by PCR for Target-Mis19-20 cloning(pUC19-TTTAA-T-Mis19-20)
R-19-TTTAA-T-Mis19-20	TGTCCTTAATATTCATCTTAAATTCACTGGCCGTCGTTTTAC
F-19-ATGAT-Target	ATGATGATGAATATTAAGGACAATCATCCTCTAG	Linearized pUC19-TTGAT-Target by PCR for ATGAT TAM cloning(pUC19-ATGAT-Target)
R-19-ATGAT-Target	GTCCTTAATATTCATCATCATTTCACTGGCCGTCGTTTTAC
F-19-CTGAT-Target	CTGATGATGAATATTAAGGACAATCATCCTCTAG	Linearized pUC19-TTGAT-Target by PCR for CTGAT TAM cloning(pUC19-CTGAT-Target)
R-19-CTGAT-Target	TGTCCTTAATATTCATCATCAGTTCACTGGCCGTCGTTTTAC
F-19-GTGAT-Target	GTGATGATGAATATTAAGGACAATCATCCTCTAG	Linearized pUC19-TTGAT-Target by PCR for GTGAT TAM cloning(pUC19-GTGAT-Target)
R-19-GTGAT-Target	TGTCCTTAATATTCATCATCACTTCACTGGCCGTCGTTTTAC
F-19-TAGAT-Target	TAGATGATGAATATTAAGGACAATCATCCTCTAG	Linearized pUC19-TTGAT-Target by PCR for TAGAT TAM cloning(pUC19-TAGAT-Target)
R-19-TAGAT-Target	TGTCCTTAATATTCATCATCTATTCACTGGCCGTCGTTTTAC
F-19-TCGAT-Target	TCGATGATGAATATTAAGGACAATCATCCTCTAG	Linearized pUC19-TTGAT-Target by PCR for TCGAT TAM cloning(pUC19-TCGAT-Target)
R-19-TCGAT-Target	TGTCCTTAATATTCATCATCGATTCACTGGCCGTCGTTTTAC
F-19-TGGAT-Target	TGGATGATGAATATTAAGGACAATCATCCTCTAG	Linearized pUC19-TTGAT-Target by PCR for TGGAT TAM cloning(pUC19-TGGAT-Target)
R-19-TGGAT-Target	TGTCCTTAATATTCATCATCCATTCACTGGCCGTCGTTTTAC
F-19-TTAAT-Target	TTAATGATGAATATTAAGGACAATCATCCTCTAG	Linearized pUC19-TTGAT-Target by PCR for TTAAT TAM cloning(pUC19-TTAAT-Target)
R-19-TTAAT-Target	GTCCTTAATATTCATCATTAATTCACTGGCCGTCGTTTTAC
F-19-TTTAT-Target	TTTATGATGAATATTAAGGACAATCATCCTCTAG	Linearized pUC19-TTGAT-Target by PCR for TTTAT TAM cloning(pUC19-TTTAT-Target)
R-19-TTTAT-Target	GTCCTTAATATTCATCATAAATTCACTGGCCGTCGTTTTAC
F-19-TTCAT-Target	TTCATGATGAATATTAAGGACAATCATCCTCTAG	Linearized pUC19-TTGAT-Target by PCR for TTCAT TAM cloning(pUC19-TTCAT-Target)
R-19-TTCAT-Target	GTCCTTAATATTCATCATGAATTCACTGGCCGTCGTTTTAC
F-19-TTGTT-Target	TTGTTGATGAATATTAAGGACAATCATCCTCTAG	Linearized pUC19-TTGAT-Target by PCR for TTGTT TAM cloning(pUC19-TTGTT-Target)
R-19-TTGTT-Target	GTCCTTAATATTCATCAACAATTCACTGGCCGTCGTTTTAC
F-19-TTGCT-Target	TTGCTGATGAATATTAAGGACAATCATCCTCTAG	Linearized pUC19-TTGAT-Target by PCR for TTGCT TAM cloning(pUC19-TTGCT-Target)
R-19-TTGCT-Target	TGTCCTTAATATTCATCAGCAATTCACTGGCCGTCGTTTTAC
F-19-TTGGT-Target	TTGGTGATGAATATTAAGGACAATCATCCTCTAG	Linearized pUC19-TTGAT-Target by PCR for TTGGT TAM cloning(pUC19-TTGGT-Target)
R-19-TTGGT-Target	GTCCTTAATATTCATCACCAATTCACTGGCCGTCGTTTTAC
F-19-TTGAA-Target	TTGAAGATGAATATTAAGGACAATCATCCTCTAG	Linearized pUC19-TTGAT-Target by PCR for TTGAA TAM cloning(pUC19-TTGAA-Target)
R-19-TTGAA-Target	TGTCCTTAATATTCATCTTCAATTCACTGGCCGTCGTTTTAC
F-19-TTGAC-Target	TTGACGATGAATATTAAGGACAATCATCCTCTAG	Linearized pUC19-TTGAT-Target by PCR for TTGAC TAM cloning(pUC19-TTGAC-Target)
R-19-TTGAC-Target	TGTCCTTAATATTCATCGTCAATTCACTGGCCGTCGTTTTAC
F-19-TTGAG-Target	TTGAGGATGAATATTAAGGACAATCATCCTCTAG	Linearized pUC19-TTGAT-Target by PCR for TTGAG TAM cloning(pUC19-TTGAG-Target)
R-19-TTGAG-Target	TGTCCTTAATATTCATCCTCAATTCACTGGCCGTCGTTTTAC
F-19-ATTAA-Target	ATTAAGATGAATATTAAGGACAATCATCCTCTAG	Linearized pUC19-TTTAA-Target by PCR for ATTAA TAM cloning(pUC19-ATTAA-Target)
R-19-ATTAA-Target	TGTCCTTAATATTCATCTTAATTTCACTGGCCGTCGTTTTAC
F-19-CTTAA-Target	CTTAAGATGAATATTAAGGACAATCATCCTCTAG	Linearized pUC19-TTTAA-Target by PCR for CTTAA TAM cloning(pUC19-CTTAA-Target)
R-19-CTTAA-Target	TGTCCTTAATATTCATCTTAAGTTCACTGGCCGTCGTTTTAC
F-19-GTTAA-Target	GTTAAGATGAATATTAAGGACAATCATCCTCTAG	Linearized pUC19-TTTAA-Target by PCR for GTTAA TAM cloning(pUC19-GTTAA-Target)
R-19-GTTAA-Target	TGTCCTTAATATTCATCTTAACTTCACTGGCCGTCGTTTTAC
F-19-TATAA-Target	TATAAGATGAATATTAAGGACAATCATCCTCTAG	Linearized pUC19-TTTAA-Target by PCR for TATAA TAM cloning(pUC19-TATAA-Target)
R-19-TATAA-Target	TGTCCTTAATATTCATCTTATATTCACTGGCCGTCGTTTTAC
F-19-TCTAA-Target	TCTAAGATGAATATTAAGGACAATCATCCTCTAG	Linearized pUC19-TTTAA-Target by PCR for TCTAA TAM cloning(pUC19-TCTAA-Target)
R-19-TCTAA-Target	TGTCCTTAATATTCATCTTAGATTCACTGGCCGTCGTTTTAC
F-19-TGTAA-Target	TGTAAGATGAATATTAAGGACAATCATCCTCTAG	Linearized pUC19-TTTAA-Target by PCR for TGTAA TAM cloning(pUC19-TGTAA-Target)
R-19-TGTAA-Target	TGTCCTTAATATTCATCTTACATTCACTGGCCGTCGTTTTAC
F-19-TTAAA-Target	TTAAAGATGAATATTAAGGACAATCATCCTCTAG	Linearized pUC19-TTAAA-Target by PCR for TTAAA TAM cloning(pUC19-TTAAA-Target)
R-19-TTAAA-Target	TGTCCTTAATATTCATCTTTAATTCACTGGCCGTCGTTTTAC
F-19-TTCAA-Target	TTCAAGATGAATATTAAGGACAATCATCCTCTAG	Linearized pUC19-TTTAA-Target by PCR for TTCAA TAM cloning(pUC19-TTCAA-Target)
R-19-TTCAA-Target	TGTCCTTAATATTCATCTTGAATTCACTGGCCGTCGTTTTAC
F-19-TTGAA-Target	TTGAAGATGAATATTAAGGACAATCATCCTCTAG	Linearized pUC19-TTTAA-Target by PCR for TTGAA TAM cloning(pUC19-TTGAA-Target)
R-19-TTGAA-Target	TGTCCTTAATATTCATCTTCAATTCACTGGCCGTCGTTTTAC
F-19-TTTTA-Target	TTTTAGATGAATATTAAGGACAATCATCCTCTAG	Linearized pUC19-TTTAA-Target by PCR for TTTTA TAM cloning(pUC19-TTTTA-Target)
R-19-TTTTA-Target	GTCCTTAATATTCATCTAAAATTCACTGGCCGTCGTTTTAC
F-19-TTTCA-Target	TTTCAGATGAATATTAAGGACAATCATCCTCTAG	Linearized pUC19-TTTAA-Target by PCR for TTTCA TAM cloning(pUC19-TTTCA-Target)
R-19-TTTCA-Target	GTCCTTAATATTCATCTGAAATTCACTGGCCGTCGTTTTAC
F-19-TTTGA-Target	TTTGAGATGAATATTAAGGACAATCATCCTCTAG	Linearized pUC19-TTTAA-Target by PCR for TTTGA TAM cloning(pUC19-TTTGA-Target)
R-19-TTTGA-Target	TGTCCTTAATATTCATCTCAAATTCACTGGCCGTCGTTTTAC
F-19-TTTAT-Target	TTTATGATGAATATTAAGGACAATCATCCTCTAG	Linearized pUC19-TTTAA-Target by PCR for TTTAT TAM cloning(pUC19-TTTAT-Target)
R-19-TTTAT-Target	GTCCTTAATATTCATCATAAATTCACTGGCCGTCGTTTTAC
F-19-TTTAC-Target	TTTACGATGAATATTAAGGACAATCATCCTCTAG	Linearized pUC19-TTTAA-Target by PCR for TTTAC TAM cloning(pUC19-TTTAC-Target)
R-19-TTTAC-Target	TGTCCTTAATATTCATCGTAAATTCACTGGCCGTCGTTTTAC
F-19-TTTAG-Target	TTTAGGATGAATATTAAGGACAATCATCCTCTAG	Linearized pUC19-TTTAA-Target by PCR for TTTAG TAM cloning(pUC19-TTTAG-Target)
R-19-TTTAG-Target	TGTCCTTAATATTCATCCTAAATTCACTGGCCGTCGTTTTAC
F-19-AAA-Target	TGAAAGATGAATATTAAGGACAATCATCCTCTAG	Linearized pUC19-TTGAT-Target by PCR for AAA TAM cloning(pUC19-AAA-Target)
R-19-AAA-Target	TGTCCTTAATATTCATCTTTCATTCACTGGCCGTCGTTTTAC
F-19-AAT-Target	TGAATGATGAATATTAAGGACAATCATCCTCTAG	Linearized pUC19-TTGAT-Target by PCR for AAT TAM cloning(pUC19-AAT-Target)
R-19-AAT-Target	TGTCCTTAATATTCATCATTCATTCACTGGCCGTCGTTTTAC
F-19-AAC-Target	TGAACGATGAATATTAAGGACAATCATCCTCTAG	Linearized pUC19-TTGAT-Target by PCR for AAC TAM cloning(pUC19-AAC-Target)
R-19-AAC-Target	TGTCCTTAATATTCATCGTTCATTCACTGGCCGTCGTTTTAC
F-19-AAG-Target	TGAAGGATGAATATTAAGGACAATCATCCTCTAG	Linearized pUC19-TTGAT-Target by PCR for AAG TAM cloning(pUC19-AAG-Target)
R-19-AAG-Target	TGTCCTTAATATTCATCCTTCATTCACTGGCCGTCGTTTTAC
F-19-ATA-Target	TGATAGATGAATATTAAGGACAATCATCCTCTAG	Linearized pUC19-TTGAT-Target by PCR for ATA TAM cloning(pUC19-ATA-Target)
R-19-ATA-Target	TGTCCTTAATATTCATCTATCATTCACTGGCCGTCGTTTTAC
F-19-ATT-Target	TGATTGATGAATATTAAGGACAATCATCCTCTAG	Linearized pUC19-TTGAT-Target by PCR for ATT TAM cloning(pUC19-ATT-Target)
R-19-ATT-Target	TGTCCTTAATATTCATCAATCATTCACTGGCCGTCGTTTTAC
F-19-ATC-Target	TGATCGATGAATATTAAGGACAATCATCCTCTAG	Linearized pUC19-TTGAT-Target by PCR for ATC TAM cloning(pUC19-ATC-Target)
R-19-ATC-Target	TGTCCTTAATATTCATCGATCATTCACTGGCCGTCGTTTTAC
F-19-ATG-Target	TGATGGATGAATATTAAGGACAATCATCCTCTAG	Linearized pUC19-TTGAT-Target by PCR for ATG TAM cloning(pUC19-ATG-Target)
R-19-ATG-Target	TGTCCTTAATATTCATCCATCATTCACTGGCCGTCGTTTTAC
F-19-ACA-Target	TGACAGATGAATATTAAGGACAATCATCCTCTAG	Linearized pUC19-TTGAT-Target by PCR for ACA TAM cloning(pUC19-ACA-Target)
R-19-ACA-Target	TGTCCTTAATATTCATCTGTCATTCACTGGCCGTCGTTTTAC
F-19-ACT-Target	TGACTGATGAATATTAAGGACAATCATCCTCTAG	Linearized pUC19-TTGAT-Target by PCR for ACT TAM cloning(pUC19-ACT-Target)
R-19-ACT-Target	TGTCCTTAATATTCATCAGTCATTCACTGGCCGTCGTTTTAC
F-19-ACC-Target	TGACCGATGAATATTAAGGACAATCATCCTCTAG	Linearized pUC19-TTGAT-Target by PCR for ACC TAM cloning(pUC19-ACC-Target)
R-19-ACC-Target	TGTCCTTAATATTCATCGGTCATTCACTGGCCGTCGTTTTAC
F-19-ACG-Target	TGACGGATGAATATTAAGGACAATCATCCTCTAG	Linearized pUC19-TTGAT-Target by PCR for ACG TAM cloning(pUC19-ACG-Target)
R-19-ACG-Target	TGTCCTTAATATTCATCCGTCATTCACTGGCCGTCGTTTTAC
F-19-AGA-Target	TGAGAGATGAATATTAAGGACAATCATCCTCTAG	Linearized pUC19-TTGAT-Target by PCR for AGA TAM cloning(pUC19-AGA-Target)
R-19-AGA-Target	TGTCCTTAATATTCATCTCTCATTCACTGGCCGTCGTTTTAC
F-19-AGT-Target	TGAGTGATGAATATTAAGGACAATCATCCTCTAG	Linearized pUC19-TTGAT-Target by PCR for AGT TAM cloning(pUC19-AGT-Target)
R-19-AGT-Target	TGTCCTTAATATTCATCACTCATTCACTGGCCGTCGTTTTAC
F-19-AGC-Target	TGAGCGATGAATATTAAGGACAATCATCCTCTAG	Linearized pUC19-TTGAT-Target by PCR for AGC TAM cloning(pUC19-AGC-Target)
R-19-AGC-Target	TGTCCTTAATATTCATCGCTCATTCACTGGCCGTCGTTTTAC
F-19-AGG-Target	TGAGGGATGAATATTAAGGACAATCATCCTCTAG	Linearized pUC19-TTGAT-Target by PCR for AGG TAM cloning(pUC19-AGG-Target)
R-19-AGG-Target	TGTCCTTAATATTCATCCCTCATTCACTGGCCGTCGTTTTAC
F-19-TAA-Target	TGTAAGATGAATATTAAGGACAATCATCCTCTAG	Linearized pUC19-TTGAT-Target by PCR for TAA TAM cloning(pUC19-TAA-Target)
R-19-TAA-Target	TGTCCTTAATATTCATCTTACATTCACTGGCCGTCGTTTTAC
F-19-TAT-Target	TGTATGATGAATATTAAGGACAATCATCCTCTAG	Linearized pUC19-TTGAT-Target by PCR for TAT TAM cloning(pUC19-TAT-Target)
R-19-TAT-Target	TGTCCTTAATATTCATCATACATTCACTGGCCGTCGTTTTAC
F-19-TAC-Target	TGTACGATGAATATTAAGGACAATCATCCTCTAG	Linearized pUC19-TTGAT-Target by PCR for TAC TAM cloning(pUC19-TAC-Target)
R-19-TAC-Target	TGTCCTTAATATTCATCGTACATTCACTGGCCGTCGTTTTAC
F-19-TAG-Target	TGTAGGATGAATATTAAGGACAATCATCCTCTAG	Linearized pUC19-TTGAT-Target by PCR for TAG TAM cloning(pUC19-TAG-Target)
R-19-TAG-Target	TGTCCTTAATATTCATCCTACATTCACTGGCCGTCGTTTTAC
F-19-TTA-Target	TGTTAGATGAATATTAAGGACAATCATCCTCTAG	Linearized pUC19-TTGAT-Target by PCR for TTA TAM cloning(pUC19-TTA-Target)
R-19-TTA-Target	TGTCCTTAATATTCATCTAACATTCACTGGCCGTCGTTTTAC
F-19-TTT-Target	TGTTTGATGAATATTAAGGACAATCATCCTCTAG	Linearized pUC19-TTGAT-Target by PCR for TTT TAM cloning(pUC19-TTT-Target)
R-19-TTT-Target	TGTCCTTAATATTCATCAAACATTCACTGGCCGTCGTTTTAC
F-19-TTC-Target	TGTTCGATGAATATTAAGGACAATCATCCTCTAG	Linearized pUC19-TTGAT-Target by PCR for TTC TAM cloning(pUC19-TTC-Target)
R-19-TTC-Target	TGTCCTTAATATTCATCGAACATTCACTGGCCGTCGTTTTAC
F-19-TTG-Target	TGTTGGATGAATATTAAGGACAATCATCCTCTAG	Linearized pUC19-TTGAT-Target by PCR for TTG TAM cloning(pUC19-TTG-Target)
R-19-TTG-Target	TGTCCTTAATATTCATCCAACATTCACTGGCCGTCGTTTTAC
F-19-TCA-Target	TGTCAGATGAATATTAAGGACAATCATCCTCTAG	Linearized pUC19-TTGAT-Target by PCR for AAA TCA cloning(pUC19-TCA-Target)
R-19-TCA-Target	TGTCCTTAATATTCATCTGACATTCACTGGCCGTCGTTTTAC
F-19-TCT-Target	TGTCTGATGAATATTAAGGACAATCATCCTCTAG	Linearized pUC19-TTGAT-Target by PCR for TCT TAM cloning(pUC19-TCT-Target)
R-19-TCT-Target	TGTCCTTAATATTCATCAGACATTCACTGGCCGTCGTTTTAC
F-19-TCC-Target	TGTCCGATGAATATTAAGGACAATCATCCTCTAG	Linearized pUC19-TTGAT-Target by PCR for TCC TAM cloning(pUC19-TCC-Target)
R-19-TCC-Target	TGTCCTTAATATTCATCGGACATTCACTGGCCGTCGTTTTAC
F-19-TCG-Target	TGTCGGATGAATATTAAGGACAATCATCCTCTAG	Linearized pUC19-TTGAT-Target by PCR for TCG TAM cloning(pUC19-TCG-Target)
R-19-TCG-Target	TGTCCTTAATATTCATCCGACATTCACTGGCCGTCGTTTTAC
F-19-TGA-Target	TGTGAGATGAATATTAAGGACAATCATCCTCTAG	Linearized pUC19-TTGAT-Target by PCR for TGA TAM cloning(pUC19-TGA-Target)
R-19-TGA-Target	TGTCCTTAATATTCATCTCACATTCACTGGCCGTCGTTTTAC
F-19-TGT-Target	TGTGTGATGAATATTAAGGACAATCATCCTCTAG	Linearized pUC19-TTGAT-Target by PCR for TGT TAM cloning(pUC19-TGT-Target)
R-19-TGT-Target	TGTCCTTAATATTCATCACACATTCACTGGCCGTCGTTTTAC
F-19-TGC-Target	TGTGCGATGAATATTAAGGACAATCATCCTCTAG	Linearized pUC19-TTGAT-Target by PCR for TGC TAM cloning(pUC19-TGC-Target)
R-19-TGC-Target	TGTCCTTAATATTCATCGCACATTCACTGGCCGTCGTTTTAC
F-19-TGG-Target	TGTGGGATGAATATTAAGGACAATCATCCTCTAG	Linearized pUC19-TTGAT-Target by PCR for TGG TAM cloning(pUC19-TGG-Target)
R-19-TGG-Target	TGTCCTTAATATTCATCCCACATTCACTGGCCGTCGTTTTAC
F-19-CAA-Target	TGCAAGATGAATATTAAGGACAATCATCCTCTAG	Linearized pUC19-TTGAT-Target by PCR for CAA TAM cloning(pUC19-CAA-Target)
R-19-CAA-Target	TGTCCTTAATATTCATCTTGCATTCACTGGCCGTCGTTTTAC
F-19-CAT-Target	TGCATGATGAATATTAAGGACAATCATCCTCTAG	Linearized pUC19-TTGAT-Target by PCR for CAT TAM cloning(pUC19-CAT-Target)
R-19-CAT-Target	TGTCCTTAATATTCATCATGCATTCACTGGCCGTCGTTTTAC
F-19-CAC-Target	TGCACGATGAATATTAAGGACAATCATCCTCTAG	Linearized pUC19-TTGAT-Target by PCR for CAC TAM cloning(pUC19-CAC-Target)
R-19-CAC-Target	TGTCCTTAATATTCATCGTGCATTCACTGGCCGTCGTTTTAC
F-19-CAG-Target	TGCAGGATGAATATTAAGGACAATCATCCTCTAG	Linearized pUC19-TTGAT-Target by PCR for CAG TAM cloning(pUC19-CAG-Target)
R-19-CAG-Target	TGTCCTTAATATTCATCCTGCATTCACTGGCCGTCGTTTTAC
F-19-CTA-Target	TGCTAGATGAATATTAAGGACAATCATCCTCTAG	Linearized pUC19-TTGAT-Target by PCR for CTA TAM cloning(pUC19-CTA-Target)
R-19-CTA-Target	TGTCCTTAATATTCATCTAGCATTCACTGGCCGTCGTTTTAC
F-19-CTT-Target	TGCTTGATGAATATTAAGGACAATCATCCTCTAG	Linearized pUC19-TTGAT-Target by PCR for CTT TAM cloning(pUC19-CTT-Target)
R-19-CTT-Target	TGTCCTTAATATTCATCAAGCATTCACTGGCCGTCGTTTTAC
F-19-CTC-Target	TGCTCGATGAATATTAAGGACAATCATCCTCTAG	Linearized pUC19-TTGAT-Target by PCR for CTC TAM cloning(pUC19-CTC-Target)
R-19-CTC-Target	TGTCCTTAATATTCATCGAGCATTCACTGGCCGTCGTTTTAC
F-19-CTG-Target	TGCTGGATGAATATTAAGGACAATCATCCTCTAG	Linearized pUC19-TTGAT-Target by PCR for CTG TAM cloning(pUC19-CTG-Target)
R-19-CTG-Target	TGTCCTTAATATTCATCCAGCATTCACTGGCCGTCGTTTTAC
F-19-CCA-Target	TGCCAGATGAATATTAAGGACAATCATCCTCTAG	Linearized pUC19-TTGAT-Target by PCR for CCA TAM cloning(pUC19-CCA-Target)
R-19-CCA-Target	TGTCCTTAATATTCATCTGGCATTCACTGGCCGTCGTTTTAC
F-19-CCT-Target	TGCCTGATGAATATTAAGGACAATCATCCTCTAG	Linearized pUC19-TTGAT-Target by PCR for CCT TAM cloning(pUC19-CCT-Target)
R-19-CCT-Target	TGTCCTTAATATTCATCAGGCATTCACTGGCCGTCGTTTTAC
F-19-CCC-Target	TGCCCGATGAATATTAAGGACAATCATCCTCTAG	Linearized pUC19-TTGAT-Target by PCR for CCC TAM cloning(pUC19-CCC-Target)
R-19-CCC-Target	TGTCCTTAATATTCATCGGGCATTCACTGGCCGTCGTTTTAC
F-19-CCG-Target	TGCCGGATGAATATTAAGGACAATCATCCTCTAG	Linearized pUC19-TTGAT-Target by PCR for CCG TAM cloning(pUC19-CCG-Target)
R-19-CCG-Target	TGTCCTTAATATTCATCCGGCATTCACTGGCCGTCGTTTTAC
F-19-CGA-Target	TGCGAGATGAATATTAAGGACAATCATCCTCTAG	Linearized pUC19-TTGAT-Target by PCR for CGA TAM cloning(pUC19-CGA-Target)
R-19-CGA-Target	TGTCCTTAATATTCATCTCGCATTCACTGGCCGTCGTTTTAC
F-19-CGT-Target	TGCGTGATGAATATTAAGGACAATCATCCTCTAG	Linearized pUC19-TTGAT-Target by PCR for CGT TAM cloning(pUC19-CGT-Target)
R-19-CGT-Target	TGTCCTTAATATTCATCACGCATTCACTGGCCGTCGTTTTAC
F-19-CGC-Target	TGCGCGATGAATATTAAGGACAATCATCCTCTAG	Linearized pUC19-TTGAT-Target by PCR for CGC TAM cloning(pUC19-CGC-Target)
R-19-CGC-Target	TGTCCTTAATATTCATCGCGCATTCACTGGCCGTCGTTTTAC
F-19-CGG-Target	TGCGGGATGAATATTAAGGACAATCATCCTCTAG	Linearized pUC19-TTGAT-Target by PCR for CGG TAM cloning(pUC19-CGG-Target)
R-19-CGG-Target	TGTCCTTAATATTCATCCCGCATTCACTGGCCGTCGTTTTAC
F-19-GAA-Target	TGGAAGATGAATATTAAGGACAATCATCCTCTAG	Linearized pUC19-TTGAT-Target by PCR for GAA TAM cloning(pUC19-GAA-Target)
R-19-GAA-Target	TGTCCTTAATATTCATCTTCCATTCACTGGCCGTCGTTTTAC
F-19-GAT-Target	TGGATGATGAATATTAAGGACAATCATCCTCTAG	Linearized pUC19-TTGAT-Target by PCR for GAT TAM cloning(pUC19-GAT-Target)
R-19-GAT-Target	TGTCCTTAATATTCATCATCCATTCACTGGCCGTCGTTTTAC
F-19-GAC-Target	TGGACGATGAATATTAAGGACAATCATCCTCTAG	Linearized pUC19-TTGAT-Target by PCR for GAC TAM cloning(pUC19-GAC-Target)
R-19-GAC-Target	TGTCCTTAATATTCATCGTCCATTCACTGGCCGTCGTTTTAC
F-19-GAG-Target	TGGAGGATGAATATTAAGGACAATCATCCTCTAG	Linearized pUC19-TTGAT-Target by PCR for GAG TAM cloning(pUC19-GAG-Target)
R-19-GAG-Target	TGTCCTTAATATTCATCCTCCATTCACTGGCCGTCGTTTTAC
F-19-GTA-Target	TGGTAGATGAATATTAAGGACAATCATCCTCTAG	Linearized pUC19-TTGAT-Target by PCR for GTA TAM cloning(pUC19-GTA-Target)
R-19-GTA-Target	TGTCCTTAATATTCATCTACCATTCACTGGCCGTCGTTTTAC
F-19-GTT-Target	TGGTTGATGAATATTAAGGACAATCATCCTCTAG	Linearized pUC19-TTGAT-Target by PCR for GTT TAM cloning(pUC19-GTT-Target)
R-19-GTT-Target	TGTCCTTAATATTCATCAACCATTCACTGGCCGTCGTTTTAC
F-19-GTC-Target	TGGTCGATGAATATTAAGGACAATCATCCTCTAG	Linearized pUC19-TTGAT-Target by PCR for GTC TAM cloning(pUC19-GTC-Target)
R-19-GTC-Target	TGTCCTTAATATTCATCGACCATTCACTGGCCGTCGTTTTAC
F-19-GTG-Target	TGGTGGATGAATATTAAGGACAATCATCCTCTAG	Linearized pUC19-TTGAT-Target by PCR for GTG TAM cloning(pUC19-GTG-Target)
R-19-GTG-Target	TGTCCTTAATATTCATCCACCATTCACTGGCCGTCGTTTTAC
F-19-GCA-Target	TGGCAGATGAATATTAAGGACAATCATCCTCTAG	Linearized pUC19-TTGAT-Target by PCR for GAC TAM cloning(pUC19-GCA-Target)
R-19-GCA-Target	TGTCCTTAATATTCATCTGCCATTCACTGGCCGTCGTTTTAC
F-19-GCT-Target	TGGCTGATGAATATTAAGGACAATCATCCTCTAG	Linearized pUC19-TTGAT-Target by PCR for GCT TAM cloning(pUC19-GCT-Target)
R-19-GCT-Target	TGTCCTTAATATTCATCAGCCATTCACTGGCCGTCGTTTTAC
F-19-GCC-Target	TGGCCGATGAATATTAAGGACAATCATCCTCTAG	Linearized pUC19-TTGAT-Target by PCR for GCC TAM cloning(pUC19-GCC-Target)
R-19-GCC-Target	TGTCCTTAATATTCATCGGCCATTCACTGGCCGTCGTTTTAC
F-19-GCG-Target	TGGCGGATGAATATTAAGGACAATCATCCTCTAG	Linearized pUC19-TTGAT-Target by PCR for GCG TAM cloning(pUC19-GCG-Target)
R-19-GCG-Target	TGTCCTTAATATTCATCCGCCATTCACTGGCCGTCGTTTTAC
F-19-GGA-Target	TGGGAGATGAATATTAAGGACAATCATCCTCTAG	Linearized pUC19-TTGAT-Target by PCR for GGA TAM cloning(pUC19-GGA-Target)
R-19-GGA-Target	TGTCCTTAATATTCATCTCCCATTCACTGGCCGTCGTTTTAC
F-19-GGT-Target	TGGGTGATGAATATTAAGGACAATCATCCTCTAG	Linearized pUC19-TTGAT-Target by PCR for GGT TAM cloning(pUC19-GGT-Target)
R-19-GGT-Target	TGTCCTTAATATTCATCACCCATTCACTGGCCGTCGTTTTAC
F-19-GGC-Target	TGGGCGATGAATATTAAGGACAATCATCCTCTAG	Linearized pUC19-TTGAT-Target by PCR for GGC TAM cloning(pUC19-GGC-Target)
R-19-GGC-Target	TGTCCTTAATATTCATCGCCCATTCACTGGCCGTCGTTTTAC
F-19-GGG-Target	TGGGGGATGAATATTAAGGACAATCATCCTCTAG	Linearized pUC19-TTGAT-Target by PCR for GGG TAM cloning(pUC19-GGG-Target)
R-19-GGG-Target	TGTCCTTAATATTCATCCCCCATTCACTGGCCGTCGTTTTAC
F-19-1	TCAGTGGAACGAAAACTCACGTTAAGG	Amplification target plasmid used for generating dsDNA cleavage substrates
R-19-1	GCGTCAGACCCCGTAGAAAAGATC
F-19-2	GGTCCTCCGATCGTTGTCAGAA	Amplification target plasmid only used for generating 3N-TAM dsDNA cleavage substrates
R-19-2	GGGGAAACGCCTGGTATCTTTAT
The primer used in the construction of pMG36c-ISLde6-ωRNA derived genome interference plasmids
primer	sequence(5'-3')	description
F-ISLde6-lacZ-T3-10nt	GGAGGTTCAATATCAGCAATGGCCGGCATGGTCCCAGCCTCCTC	Linearized pMG36c-ωRNA-ISLde6-by PCR for Target "lacZ-T3-10nt" cloning(pMG36c-ISLde6-ωRNA-lacZ-T3-10nt)
R-ISLde6-lacZ-T3-10nt	ATTGCTGATATTGAACCTCCTACGACTAAAGTCGC
F-ISLde6-lacZ-T3-12nt	GGTTCAATATCAGCAATGGGGCCGGCATGGTCCCAGCCTCCTC	Linearized pMG36c-ωRNA-ISLde6-by PCR for Target "lacZ-T3-12nt" cloning(pMG36c-ISLde6-ωRNA-lacZ-T3-12nt)
R-ISLde6-lacZ-T3-12nt	CCATTGCTGATATTGAACCTCCTACGACTAAAGTCGC
F-ISLde6-lacZ-T3-14nt	TCAATATCAGCAATGGGCGGCCGGCATGGTCCCAGCCTCCTC	Linearized pMG36c-ωRNA-ISLde6-by PCR for Target "lacZ-T3-14nt" cloning(pMG36c-ISLde6-ωRNA-lacZ-T3-14nt)
R-ISLde6-lacZ-T3-14nt	GCCCATTGCTGATATTGAACCTCCTACGACTAAAGTCGC
F-ISLde6-lacZ-T3-16nt	TCAATATCAGCAATGGGCTAGGCCGGCATGGTCCCAGCCTCCTC	Linearized pMG36c-ωRNA-ISLde6-by PCR for Target "lacZ-T3-16nt" cloning(pMG36c-ISLde6-ωRNA-lacZ-T3-16nt)
R-ISLde6-lacZ-T3-16nt	GCCCATTGCTGATATTGAACCTCCTACGACTAAAGTCGC
F-ISLde6-lacZ-T3-18nt	TATCAGCAATGGGCTAGTGGCCGGCATGGTCCCAGCCTCCTC	Linearized pMG36c-ωRNA-ISLde6-by PCR for Target "lacZ-T3-18nt" cloning(pMG36c-ISLde6-ωRNA-lacZ-T3-18nt)
R-ISLde6-lacZ-T3-18nt	CACTAGCCCATTGCTGATATTGAACCTCCTACGACTAAAGTCGC
F-ISLde6-lacZ-T3-20nt	TATCAGCAATGGGCTAGTGCGGCCGGCATGGTCCCAGCCTCCTC	Linearized pMG36c-ωRNA-ISLde6-by PCR for Target "lacZ-T3-20nt" cloning(pMG36c-ISLde6-ωRNA-lacZ-T3-20nt)
R-ISLde6-lacZ-T3-20nt	CACTAGCCCATTGCTGATATTGAACCTCCTACGACTAAAGTCGC
F-ISLde6-lacZ-T3-22nt	TATCAGCAATGGGCTAGTGCGCGGCCGGCATGGTCCCAGCCTCCTC	Linearized pMG36c-ωRNA-ISLde6-by PCR for Target "lacZ-T3-22nt" cloning(pMG36c-ISLde6-ωRNA-lacZ-T3-22nt)
R-ISLde6-lacZ-T3-22nt	CACTAGCCCATTGCTGATATTGAACCTCCTACGACTAAAGTCGC
F-ISLde6-lacZ-T3-24nt	TATCAGCAATGGGCTAGTGCGCAAGGCCGGCATGGTCCCAGCCTCCTC	Linearized pMG36c-ωRNA-ISLde6-by PCR for Target "lacZ-T3-24nt" cloning(pMG36c-ISLde6-ωRNA-lacZ-T3-24nt)
R-ISLde6-lacZ-T3-24nt	CACTAGCCCATTGCTGATATTGAACCTCCTACGACTAAAGTCGC
F-ISLde6-lacZ-T3-26nt	TCAGCAATGGGCTAGTGCGCAAGAGGCCGGCATGGTCCCAGCCTCCTC	Linearized pMG36c-ωRNA-ISLde6-by PCR for Target "lacZ-T3-26nt" cloning(pMG36c-ISLde6-ωRNA-lacZ-T3-24nt)
R-ISLde6-lacZ-T3-26nt	CACTAGCCCATTGCTGATATTGAACCTCCTACGACTAAAGTCGC
F-ISLde6-lacZ-T3-28nt	GGCTAGTGCGCAAGACAGGCCGGCATGGTCCCAGCCTCCTC	Linearized pMG36c-ωRNA-ISLde6-by PCR for Target "lacZ-T3-28nt" cloning(pMG36c-ISLde6-ωRNA-lacZ-T3-26nt)
R-ISLde6-lacZ-T3-28nt	CTGTCTTGCGCACTAGCCCATTGCTGATATTGAACCTCCTACGACTAAAGTCGC
F-ISLde6-lacZ-T3-30nt	GCTAGTGCGCAAGACATCGGCCGGCATGGTCCCAGCCTCCTC	Linearized pMG36c-ωRNA-ISLde6-by PCR for Target "lacZ-T3-30nt" cloning(pMG36c-ISLde6-ωRNA-lacZ-T3-30nt)
R-ISLde6-lacZ-T3-30nt	GATGTCTTGCGCACTAGCCCATTGCTGATATTGAACCTCCTACGACTAAAGTCGC
The primer used in the construction of pMG36c-ISLam-ωRNA derived genome interference plasmids
primer	sequence(5'-3')	description
F-ISLam-lacZ-T4-10nt	GTTGACTGGTCCAGGAGGCCGGCATGGTCCCAGCCTCCTC	Linearized pMG36c-ωRNA-ISLam-by PCR for Target "lacZ-T4-10nt" cloning(pMG36c-ISLam-ωRNA-lacZ-T4-10nt)
R-ISLam-lacZ-T4-10nt	CCTCCTGGACCAGTCAACTACCCTAGACTGAAGT
F-ISLam-lacZ-T4-12nt	GTTGACTGGTCCAGGATAGGCCGGCATGGTCCCAGCCTCCTC	Linearized pMG36c-ωRNA-ISLam-by PCR for Target "lacZ-T4-12nt" cloning(pMG36c-ISLam-ωRNA-lacZ-T4-12nt)
R-ISLam-lacZ-T4-12nt	TATCCTGGACCAGTCAACTACCCTAGACTGAAGT
F-ISLam-lacZ-T4-14nt	GTTGACTGGTCCAGGATAACGGCCGGCATGGTCCCAGCCTCCTC	Linearized pMG36c-ωRNA-ISLam-by PCR for Target "lacZ-T4-14nt" cloning(pMG36c-ISLam-ωRNA-lacZ-T4-14nt)
R-ISLam-lacZ-T4-14nt	GTTATCCTGGACCAGTCAACTACCCTAGACTGAAGT
F-ISLam-lacZ-T4-16nt	TTGACTGGTCCAGGATAACCGGGCCGGCATGGTCCCAGCCTCCTC	Linearized pMG36c-ωRNA-ISLam-by PCR for Target "lacZ-T4-16nt" cloning(pMG36c-ISLam-ωRNA-lacZ-T4-16nt)
R-ISLam-lacZ-T4-16nt	GTTATCCTGGACCAGTCAACTACCCTAGACTGAAGT
F-ISLam-lacZ-T4-18nt	TGGTCCAGGATAACCGCCGGCCGGCATGGTCCCAGCCTCCTC	Linearized pMG36c-ωRNA-ISLam-by PCR for Target "lacZ-T4-18nt" cloning(pMG36c-ISLam-ωRNA-lacZ-T4-18nt)
R-ISLam-lacZ-T4-18nt	GGCGGTTATCCTGGACCAGTCAACTACCCTAGACTGAAGT
F-ISLam-lacZ-T4-20nt	TGGTCCAGGATAACCGCCTGGGCCGGCATGGTCCCAGCCTCCTC	Linearized pMG36c-ωRNA-ISLam-by PCR for Target "lacZ-T4-20nt" cloning(pMG36c-ISLam-ωRNA-lacZ-T4-20nt)
R-ISLam-lacZ-T4-20nt	CAGGCGGTTATCCTGGACCAGTCAACTACCCTAGACTGAAGT
F-ISLam-lacZ-T4-22nt	CAGGATAACCGCCTGGAGGCCGGCATGGTCCCAGCCTCCTC	Linearized pMG36c-ωRNA-ISLam-by PCR for Target "lacZ-T4-22nt" cloning(pMG36c-ISLam-ωRNA-lacZ-T4-22nt)
R-ISLam-lacZ-T4-22nt	CTCCAGGCGGTTATCCTGGACCAGTCAACTACCCTAGACTGAAGT
F-ISLam-lacZ-T4-24nt	CAGGATAACCGCCTGGATAGGCCGGCATGGTCCCAGCCTCCTC	Linearized pMG36c-ωRNA-ISLam-by PCR for Target "lacZ-T4-24nt" cloning(pMG36c-ISLam-ωRNA-lacZ-T4-24nt)
R-ISLam-lacZ-T4-24nt	TATCCAGGCGGTTATCCTGGACCAGTCAACTACCCTAGACTGAAGT
F-ISLam-lacZ-T4-26nt	CAGGATAACCGCCTGGATAAAGGCCGGCATGGTCCCAGCCTCCTC	Linearized pMG36c-ωRNA-ISLam-by PCR for Target “lacZ-T4-26nt" cloning(pMG36c-ISLam-ωRNA-lacZ-T4-26nt)
R-ISLam-lacZ-T4-26nt	TTTATCCAGGCGGTTATCCTGGACCAGTCAACTACCCTAGACTGAAGT
F-ISLam-lacZ-T4-28nt	GGATAACCGCCTGGATAAATAGGCCGGCATGGTCCCAGCCTCCTC	Linearized pMG36c-ωRNA-ISLam-by PCR for Target "lacZ-T4-28nt“ cloning(pMG36c-ISLam-ωRNA-lacZ-T4-28nt)
R-ISLam-lacZ-T4-28nt	TTTATCCAGGCGGTTATCCTGGACCAGTCAACTACCCTAGACTGAAGT
F-ISLam-lacZ-T4-30nt	GGATAACCGCCTGGATAAATATTGGCCGGCATGGTCCCAGCCTCCTC	Linearized pMG36c-ωRNA-ISLam-by PCR for Target "lacZ-T4-30nt" cloning(pMG36c-ISLam-ωRNA-lacZ-T4-30nt)
R-ISLam-lacZ-T4-30nt	TTTATCCAGGCGGTTATCCTGGACCAGTCAACTACCCTAGACTGAAGT
The primer used in the construction of pET30a derived protein expression plasmids
primer	sequence(5'-3')	description
F-30a-TnpB	TAGTCTTCTGGTCTGGTGCCACGCGGTCT	Linearized pET30a by PCR for ISLde6-10His and ISLam-14His cloning
R-30a-TnpB	CATATGTATATCTCCTTCTTAAAGTTAAAC
F-30a-ISLde6-10His	TAAGAAGGAGATATACATATGGTGTCTAATGAAGAAAAGTATGG	Amplification ISLde6-10His protein coding sequence for ISLde6-10His cloning(pET30a-ISLde6-10His)
R-30a-ISLde6-10His	GGCACCAGACCAGAAGACTAATGATGATGGTGGTGGTG
F-30a-RNA	GATGAATATTAAGGACAATCGGCCGGCATGGTCCCAGCCTCCTCGCT	Linearized pET30a-ISLde6-10His by PCR for ISLde6-ωRNA-T and ISLde6-ωRNA-T cloning
R-30a-RNA	CCTATAGTGAGTCGTATTAATCGCCCATTCGCCAATCCGGATAT
F-30a-ISLde6-RNA	TAATACGACTCACTATAGGGGCGAAACGGAACAATCGTCCTTAG	Amplification ISLde6-ωRNA-Target coding sequence for ISLde6-ωRNA-guide cloning(pET30a-ISLde6-ωRNA-T)
R-30a-ISLde6-RNA	GATTGTCCTTAATATTCATCTTGAACCTCCTACGACTAAAGTCGC
F-30a-ISLam-14His	AGAAGGAGATATACATATGATGAAAAGAATGAGCAGTTTAGC	Amplification ISLam-14His protein coding sequence for ISLam-14His cloning(pET30a-ISLam-14His)
R-30a-ISLam-14His	CTACCCGGTATGGTGATGACTGCCTG
F-30a-ISLam-RNA	TTAATACGACTCACTATAGGAAAGGCTGCAGTCCGTTAG	Amplification ISLam-ωRNA-Target coding sequence for ISLam-ωRNA-guide cloning(pET30a-ISLam-ωRNA-T)
R-30a-ISLam-RNA	GATGAATATTAAGGACAATCGGCCGGCATGGTCCCAGCCTCCTC

## Sheet: fig.4
The primer used in the construction of ISLde6 variant plasmids
primer	sequence(5'-3')	description
F-pSMC-K62E-T4	TCTCTCAAGAACCAATCCAATACGTTCTTAATAAG	Linearized pSMC-ISLde6-T4 by PCR to introduce K62E mutation to ISLde6 (pSMC-K62E-T4)
R-pSMC-K62E-T4	TATTGGATTGGTTCTTGAGAGAATGGCATTGGTCTAC
F-pSMC-K62R-T4	TCTCTCAAAGACCAATCCAATACGTTCTTAATAAG	Linearized pSMC-ISLde6-T4 by PCR to introduce K62R mutation to ISLde6 (pSMC-K62R-T4)
R-pSMC-K62R-T4	TATTGGATTGGTCTTTGAGAGAATGGCATTGGTCTAC
F-pSMC-Y66R-T4	GCCAATCCAAAGAGTTCTTAATAAGATCAAGACCGG	Linearized pSMC-ISLde6-T4 by PCR to introduce Y66R mutation to ISLde6 (pSMC-Y66R-T4)
R-pSMC-Y66R-T4	TAAGAACTCTTTGGATTGGCTTTTGAGAGAATG
F-pSMC-N69D-T4	CAATACGTTCTTGACAAGATCAAGACCGGATTCATTAAG	Linearized pSMC-ISLde6-T4 by PCR to introduce N69D mutation to ISLde6 (pSMC-N69D-T4)
R-pSMC-N69D-T4	GATCTTGTCAAGAACGTATTGGATTGGCTT
F-pSMC6-N69R-T4	CAATACGTTCTTAGAAAGATCAAGACCGGATTCATTAAG	Linearized pSMC-ISLde6-T4 by PCR to introduce N69R mutation to ISLde6 (pSMC-N69R-T4)
R-pSMC6-N69R-T4	GATCTTTCTAAGAACGTATTGGATTGGCTT
F-pSMC-S94E-T4	TCTTGTCCGAACACTCTGCCGATGAATTC	Linearized pSMC-ISLde6-T4 by PCR to introduce S94E mutation to ISLde6 (pSMC-S94E-T4)
R-pSMC-S94E-T4	GCAGAGTGTTCGGACAAGAATAAGACACTCTTC
F-pSMC-S94R-T4	CTTGTCCAGACACTCTGCCGATGAATTCC	Linearized pSMC-ISLde6-T4 by PCR to introduce S94R mutation to ISLde6 (pSMC-S94R-T4)
R-pSMC-S94R-T4	GGAATTCATCGGCAGAGTGTCTGGACAAGAATAAGACACTCTTC
F-pSMC-H95E-T4	CTTGTCCTCCGAATCTGCCGATGAATTCCTTAAAAC	Linearized pSMC-ISLde6-T4 by PCR to introduce H95E mutation to ISLde6 (pSMC-H95E-T4)
R-pSMC-H95E-T4	GCAGATTCGGAGGACAAGAATAAGACACTC
F-pSMC-T106K-T4	CTGTTTACAAGAACTTTTCTCAGTACCGTAAGAG	Linearized pSMC-ISLde6-T4 by PCR to introduce T106K mutation to ISLde6 (pSMC-T106K-T4)
R-pSMC-T106K-T4	GAGAAAAGTTCTTGTAAACAGTTTTAAGGAATTCATC
F-pSMC-T106N-T4	CTGTTTACAACAACTTTTCTCAGTACCGTAAGAG	Linearized pSMC-ISLde6-T4 by PCR to introduce T106N mutation to ISLde6 (pSMC-T106N-T4)
R-pSMC-T106N-T4	CTGAGAAAAGTTGTTGTAAACAGTTTTAAGGAATTCATC
F-pSMC-Q110K-T4	CACTAACTTTTCTAAGTACCGTAAGAGATTGGTCAAG	Linearized pSMC-ISLde6-T4 by PCR to introduce Q110K mutation to ISLde6 (pSMC-Q110K-T4)
R-pSMC-Q110K-T4	CGGTACTTAGAAAAGTTAGTGTAAACAGTTTTAAGG
F-pSMC-K117R-T4	GAGATTGGTCAGAGCTGATAAATCCATGGACG	Linearized pSMC-ISLde6-T4 by PCR to introduce K117R mutation to ISLde6 (pSMC-K117R-T4)
R-pSMC-K117R-T4	TATCAGCTCTGACCAATCTCTTACGGTACTG
F-pSMC-Y151R-T4	CAAGTCTTGGAGACGTAAAGGTTCCATTAACTTC	Linearized pSMC-ISLde6-T4 by PCR to introduce Y151R mutation to ISLde6 (pSMC-Y151R-T4)
R-pSMC-Y151R-T4	CTTTACGTCTCCAAGACTTGTGCAATTGGTTC
F-pSMC-R152Y-T4	GTCTTGGTACTACAAAGGTTCCATTAACTTCTTG	Linearized pSMC-ISLde6-T4 by PCR to introduce R152Y mutation to ISLde6 (pSMC-R152Y-T4)
R-pSMC-R152Y-T4	GAACCTTTGTAGTACCAAGACTTGTGCAATTG
F-pSMC-S155R-T4	CGTAAAGGTAGAATTAACTTCTTGAGAAACGGTG	Linearized pSMC-ISLde6-T4 by PCR to introduce S155R mutation to ISLde6 (pSMC-S155R-T4)
R-pSMC-S155R-T4	GAAGTTAATTCTACCTTTACGGTACCAAGACTTG
F-pSMC-N161K-T4	CTTCTTGAGAAAAGGTGCTTCTTTCAGAACC	Linearized pSMC-ISLde6-T4 by PCR to introduce N161K mutation to ISLde6 (pSMC-N161K-T4)
R-pSMC-N161K-T4	GAAGCACCTTTTCTCAAGAAGTTAATGGAACCTTTAC
F-pSMC-Q171P-T4	CATCACTTCCCCTAAGCTACCTGAAGACTCTAAG	Linearized pSMC-ISLde6-T4 by PCR to introduce Q171P mutation to ISLde6 (pSMC-Q171P-T4)
R-pSMC-Q171P-T4	GTAGCTTAGGGGAAGTGATGGTTCTGAAAG
F-pSMC-Q171K-T4	CCATCACTTCCAAGAAGCTACCTGAAGACTCTAAGG	Linearized pSMC-ISLde6-T4 by PCR to introduce Q171K mutation to ISLde6 (pSMC-Q171K-T4)
R-pSMC-Q171K-T4	AGCTTCTTGGAAGTGATGGTTCTGAAAGAAG
F-pSMC-Q171R-T4	CCATCACTTCCAGAAAGCTACCTGAAGACTCTAAG	Linearized pSMC-ISLde6-T4 by PCR to introduce Q171R mutation to ISLde6 (pSMC-Q171R-T4)
R-pSMC-Q171R-T4	GTAGCTTTCTGGAAGTGATGGTTCTGAAAG
F-pSMC-D207N-T4	GTTATTGAAAACTTGTCTGAATTGAACTTGAAAGAC	Linearized pSMC-ISLde6-T4 by PCR to introduce D207N mutation to ISLde6 (pSMC-D207N-T4)
R-pSMC-D207N-T4	CAATTCAGACAAGTTTTCAATAACTTCGACGGTACC
F-pSMC-K222R-T4	GACAAAGATTAGAAAATTGCCAGACGGTTCTTAC	Linearized pSMC-ISLde6-T4 by PCR to introduce K222R mutation to ISLde6 (pSMC-K222R-T4)
R-pSMC-K222R-T4	GGCAATTTTCTAATCTTTGTCAAAGCAATGTCTTTC
F-pSMC-S236E-T4	CAATTGACCTTTGAATTGCCAAGAAAGAAGCAAAAG	Linearized pSMC-ISLde6-T4 by PCR to introduce S236E mutation to ISLde6 (pSMC-S236E-T4)
R-pSMC-S236E-T4	CTTGGCAATTCAAAGGTCAATTGTAATCTGTAAG
F-pSMC-S236Q-T4	CAATTGACCTTTGAATTGCCAAGAAAGAAGCAAAAG	Linearized pSMC-ISLde6-T4 by PCR to introduce S236Q mutation to ISLde6 (pSMC-S236Q-T4)
R-pSMC-S236Q-T4	GGCAATTCAAAGGTCAATTGTAATCTGTAAG
F-pSMC-S236R-T4	CAATTGACCTTTAGATTGCCAAGAAAGAAGCAAAAG	Linearized pSMC-ISLde6-T4 by PCR to introduce S236R mutation to ISLde6 (pSMC-S236R-T4)
R-pSMC-S236R-T4	CTTGGCAATCTAAAGGTCAATTGTAATCTGTAAGAAC
F-pSMC-K240R-T4	CCTTGCCAAGAAGAAAGCAAAAGTCCAAGACCATC	Linearized pSMC-ISLde6-T4 by PCR to introduce K240R mutation to ISLde6 (pSMC-K240R-T4)
R-pSMC-K240R-T4	TGCTTTCTTCTTGGCAAGGAAAAGGTC
F-pSMC-D293R-T4	CTGCTCGTAGATTAGAAGGTAACGCTCACGG	Linearized pSMC-ISLde6-T4 by PCR to introduce D293R mutation to ISLde6 (pSMC-D293R-T4)
R-pSMC-D293R-T4	CCTTCTAATCTACGAGCAGATTTGATGGC
F-pSMC-R310H-T4	GAAAGCTCGACCATAGACAACAAAAGTTGAATGCC	Linearized pSMC-ISLde6-T4 by PCR to introduce R310H mutation to ISLde6 (pSMC-R310H-T4)
R-pSMC-R310H-T4	GTTGTCTATGGTCGAGCTTTCTGTATAACTTG
F-pSMC-N321R-T4	GCCAAGAGATCTAGAATGTTGACCAATGAATATAGAC	Linearized pSMC-ISLde6-T4 by PCR to introduce N321R mutation to ISLde6 (pSMC-N321R-T4)
R-pSMC-N321R-T4	CAACATTCTAGATCTCTTGGCATTCAAC
F-pSMC-N325D-T4	CATGTTGACCGACGAATATAGACATTTGGTCCACG	Linearized pSMC-ISLde6-T4 by PCR to introduce N325D mutation to ISLde6 (pSMC-N325D-T4)
R-pSMC-N325D-T4	CTATATTCGTCGGTCAACATGTTAGATCTCTTG
F-pSMC-E350N-T4	GATGCTTACAACATGAGAAAGAGAGGTAAGGGT	Linearized pSMC-ISLde6-T4 by PCR to introduce E350N mutation to ISLde6 (pSMC-E350N-T4)
R-pSMC-E350N-T4	CTTTCTCATGTTGTAAGCATCTAATTTTTCAACAACG
F-pSMC-E350K-T4	GATGCTTACAAGATGAGAAAGAGAGGTAAGG	Linearized pSMC-ISLde6-T4 by PCR to introduce E350K mutation to ISLde6 (pSMC-E350K-T4)
R-pSMC-E350K-T4	CTTTCTCATCTTGTAAGCATCTAATTTTTCAACAAC
F-pSMC-E350R-T4	GATGCTTACAGAATGAGAAAGAGAGGTAAGG	Linearized pSMC-ISLde6-T4 by PCR to introduce E350R mutation to ISLde6 (pSMC-E350R-T4)
R-pSMC-E350R-T4	CTTTCTCATTCTGTAAGCATCTAATTTTTCAACAAC
F-pSMC-M351L-T4	GATGCTTACGAATTAAGAAAGAGAGGTAAGGGTTC	Linearized pSMC-ISLde6-T4 by PCR to introduce M351L mutation to ISLde6 (pSMC-M351L-T4)
R-pSMC-M351L-T4	CTCTTTCTTAATTCGTAAGCATCTAATTTTTCAAC
F-pSMC-K362R-T4	CGCTCAAAGAAGAGGTATCAACAGACGTTTAGCT	Linearized pSMC-ISLde6-T4 by PCR to introduce K362R mutation to ISLde6 (pSMC-K362R-T4)
R-pSMC-K362R-T4	GTTGATACCTCTTCTTTGAGCGGAACCCTTAC
F-pSMC-N365R-T4	GGGTATCAGAAGACGTTTAGCTGTTTTGAAG	Linearized pSMC-ISLde6-T4 by PCR to introduce N365R mutation to ISLde6 (pSMC-N365R-T4)
R-pSMC-N365R-T4	GCTAAACGTCTTCTGATACCCTTTCTTTGAGCG
F-pSMC-R367T-T4	GTATCAACAGAACCTTAGCTGTTTTGAAGCCATAC	Linearized pSMC-ISLde6-T4 by PCR to introduce R367T mutation to ISLde6 (pSMC-R367T-T4)
R-pSMC-R367T-T4	CAGCTAAGGTTCTGTTGATACCCTTTCTTTG
F-pSMC-K372N-T4	GCTGTTTTGAACCCATACGAATTGATGACCATTTTG	Linearized pSMC-ISLde6-T4 by PCR to introduce K372N mutation to ISLde6 (pSMC-K372N-T4)
R-pSMC-K372N-T4	CGTATGGGTTCAAAACAGCTAAACGTCTGTTG
F-pSMC-S382Y-T4	CCATTTTGGAATATTTGGTCAAAAAGCAAAACAAAAG	Linearized pSMC-ISLde6-T4 by PCR to introduce S382Y mutation to ISLde6 (pSMC-S382Y-T4)
R-pSMC-S382Y-T4	GACCAAATATTCCAAAATGGTCATCAATTCG
F-pSMC-S382R-T4	GACCATTTTGGAAAGATTGGTCAAAAAGCAAAACAAAAG	Linearized pSMC-ISLde6-T4 by PCR to introduce S382R mutation to ISLde6 (pSMC-S382R-T4)
R-pSMC-S382R-T4	GACCAATCTTTCCAAAATGGTCATCAATTCGTATG
F-pSMC-K386W-T4	GGTCAAATGGCAAAACAAAAGATTCGTTAAGG	Linearized pSMC-ISLde6-T4 by PCR to introduce K386W mutation to ISLde6 (pSMC-K386W-T4)
R-pSMC-K386W-T4	CTTTTGTTTTGCCATTTGACCAAAGATTCCAAAATG
F-pSMC-K386R-T4	CTTTGGTCAAAAGACAAAACAAAAGATTCGTTAAGG	Linearized pSMC-ISLde6-T4 by PCR to introduce K386R mutation to ISLde6 (pSMC-K386R-T4)
R-pSMC-K386R-T4	GTTTTGTCTTTTGACCAAAGATTCCAAAATGG
F-pSMC-S400R-T4	CTTTCTGGACTAGAAAGGCTTGTCACGATTGC	Linearized pSMC-ISLde6-T4 by PCR to introduce S400R mutation to ISLde6 (pSMC-S400R-T4)
R-pSMC-S400R-T4	GCCTTTCTAGTCCAGAAAGAATCAACCTTAACG
F-pSMC-S400D-T4	CTTTCTGGACTGATAAGGCTTGTCACGATTGC	Linearized pSMC-ISLde6-T4 by PCR to introduce S400D mutation to ISLde6 (pSMC-S400D-T4)
R-pSMC-S400D-T4	AGCCTTATCAGTCCAGAAAGAATCAACCTTAACG
F-SC-ISLde6-T1	CTCAAATGAGCTTCAAATTGGGCCGGCATGGTCCCAGCCTCCTC	Linearized pSMC-ISLde6-ωRNA by PCR for Target1 cloning(pSMC-E350R-T1)
R-SC-ISLde6-T1	CAATTTGAAGCTCATTTGAGTTGAACCTCCTACGACTAAAGTC
F-SC-ISLde6-T2	TAAATGCTCTTTTTGAATATGGCCGGCATGGTCCCAGCCTCCTC	Linearized pSMC-ISLde6-ωRNA by PCR for Target2 cloning(pSMC-E350R-T2)
R-SC-ISLde6-T2	ATATTCAAAAAGAGCATTTATTGAACCTCCTACGACTAAAGTCGC
F-SC-ISLde6-T3	TGCATTTTCTGCCAACAACTGGCCGGCATGGTCCCAGCCTCCTC	Linearized pSMC-ISLde6-ωRNA by PCR for Target3 cloning(pSMC-E350R-T3)
R-SC-ISLde6-T3	AGTTGTTGGCAGAAAATGCATTGAACCTCCTACGACTAAAGTCGC
F-SC-ISLde6-T4	GCTTGCGTCACTTCTCAATTGGCCGGCATGGTCCCAGCCTCCTC	Linearized pSMC-ISLde6-ωRNA by PCR for Target4 cloning(pSMC-E350R-T4)
R-SC-ISLde6-T4	AATTGAGAAGTGACGCAAGCTTGAACCTCCTACGACTAAAGTCGC
F-SC-ISLde6-T5	TGGAATATCAGTTCTACCTGGGCCGGCATGGTCCCAGCCTCCTC	Linearized pSMC-ISLde6-ωRNA by PCR for Target5 cloning(pSMC-E350R-T5)
R-SC-ISLde6-T5	CAGGTAGAACTGATATTCCATTGAACCTCCTACGACTAAAGTCGCA

## Sheet: fig.5
These primers were used to fuse various functional domains to ISLde6.
primer	sequence(5'-3')	description
F-N-ISLde6	CAAGAAGAAAAGGAAAGTGGGTGGTGGCGGTTCTGTTTCTAACGAAGAAAAGTACGGTT	Linearized pSMC-ISLde6-T4 by PCR for fusing functional domain to the N-terminal of ISLde6
R-N-ISLde6	GACCTTTCTCTTCTTTTTTGG
F-C-ISLde6	CACCTTCCTCTTCTTCTTGGGGTCAGCCCTGCTAACTTCAGTAACCAAGG	Linearized pSMC-ISLde6-T4 by PCR for fusing functional domain to the C-terminal of ISLde6
R-C-ISLde6	GGTTCTAAGAGACCAGCTGCGACGAAG
F-N-Sso7d	GCCTCCAAAAAAGAAGAGAAAGGTCATGGCCACCGTTAAGTTCAAG	Amplification Sso7d protein coding sequence for cloning Sso7d to the N-terminal of ISLde6(pSMC-Sso7d-ISLde6-T4)
R-N-Sso7d	CACTTTCCTTTTCTTCTTGGGGTCAGCCCTGCTCTTCTTTTGTTTTTCTAACATTTGTAAC
F-C-Sso7d	CAAGAAGAAGAGGAAGGTGGGTGGTGGCGGTTCTATGGCCACCGTTAAGTTCAAG	Amplification Sso7d protein coding sequence for cloning Sso7d to the C-terminal of ISLde6(pSMC-ISLde6-Sso7d-T4)
R-C-Sso7d	CAGCTGGTCTCTTAGAACCCTTCTTTTGTTTTTCTAACATTTG
F-C-T5E	GGAAGGTGGGTGGTGGCGGTTCTTCCAAATCTTGGGGAAAGTTTATTG	Amplification T5E protein coding sequence for cloning T5E to the C-terminal of ISLde6(pSMC-ISLde6-T5E-T4)
R-C-T5E	CAGCTGGTCTCTTAGAACCTTGTTCAGCAATTTCCAAAATATC
F-N-T5E	CTCCAAAAAAGAAGAGAAAGGTCTCCAAATCTTGGGGAAAGTTTATTG	Amplification T5E protein coding sequence for cloning T5E to the N-terminal of ISLde6(pSMC-T5E-ISLde6-T4)
R-N-T5E	CACTTTCCTTTTCTTCTTGGGGTCAGCCCTGCTTGTTCAGCAATTTCCAAAATATCTT
F-C-ExoIII	GGAAGGTGGGTGGTGGCGGTTCTATGAAGTTCGTTTCTTTCAAC	Amplification ExoIII protein coding sequence for cloning ExoIII to the C-terminal of ISLde6(pSMC-ISLde6-ExoIII-T4)
R-C-ExoIII	CAGCTGGTCTCTTAGAACCTCTTCTAAAAGTAGCCCAAACTG
F-N-ExoIII	TACAAAATGCCTCCAAAAAAGAAGAGAAAGGTCATGAAGTTCGTTTCTTTCAACAT	Amplification ExoIII protein coding sequence for cloning ExoIII to the N-terminal of ISLde6(pSMC-ExoIII-ISLde6-T4)
R-N-ExoIII	CCACTTTCCTTTTCTTCTTGGGGTCAGCCCTGCTTCTTCTAAAAGTAGCCCAAACTGGA
F-N-T5E	CAAGAAGAAGAGGAAGGTGGGTGGTGGCGGTTCTTCCAAATCTTGGGGAAAGTTTATTG	Linearized pSMC-ISLde6-T5E-T4 by PCR for fusing Sso7d to the N-terminal of ISLde6
R-N-T5E	CTTAACGGTGGCCATAGAACCGCCACCACCCAC
F-Sso7d-T5	GGTTCTATGGCCACCGTTAAGTTCAAG	Amplification Sso7d protein coding sequence for cloning Sso7d to the N-terminal of T5E(pSMC-ISLde6-Sso7d-T5E-T4)
R-Sso7d-T5	CACCTTCCTCTTCTTCTTGGGGTCAGCCCTGCTCTTCTTTTGTTTTTCTAACATTTG
F-C-T5E	GGTTCTAAGAGACCAGCTGCGAC	Linearized pSMC-ISLde6-T5E-T4 by PCR for fusing Sso7d to the C-terminal of ISLde6
R-C-T5E	CCTTCCTCTTCTTCTTGGGGTCAGCCCTGCTAGAACCTTGTTCAGCAATTTCCAAAAT
F-T5-Sso7d	CCAAGAAGAAGAGGAAGGTGGGTGGTGGCGGTTCTATGGCCACCGTTAAGTTC	Amplification Sso7d protein coding sequence for cloning Sso7d to the C-terminal of T5E(pSMC-ISLde6-T5E-Sso7d-T4)
R-T5-Sso7d	GCAGCTGGTCTCTTAGAACCCTTCTTTTGTTTTTCTAACATTTG
