# Supplementary material
Source: Research Square preprint supplement (doi:10.21203/rs.3.rs-9485642/v1)
Supplement: Supplementary file 2 [file ca46d4a7adf031eacbde905e.xlsx]

## Sheet: fig.2
fig2. b
	Transformed efficiency			p value	Guide sequence	Target site number
ISLde4-NT	1752	2116	2116	0.178448	AGGTCTTCGACGTCGAAGAC(NT)	0
ISLde4-T	1988	1204	1532		TGCGCATACTGCAGCTAATT	30
ISLde5-NT	1610	1900	1760	0.120601	AGGTCTTCGACGTCGAAGAC(NT)	0
ISLde5-T	1225	925	1700		CTAGATTTTCGCGATTTACC	32
ISLde6-NT	1594	1935	1783	5.65888e-05	AGGTCTTCGACGTCGAAGAC(NT)	0
ISLde6-T	0	0	0		TTGCGCATGGATATAGTTAA	32
ISLag3-NT	1463	2723	2107	0.325812	AGGTCTTCGACGTCGAAGAC(NT)	0
ISLag3-T	1806	1729	1498		GACGACCAATAATAGTATCA	32
ISLhe6-NT	1732	934	1654	0.225459	AGGTCTTCGACGTCGAAGAC(NT)	0
ISLhe6-T	1098	1116	1005		GTTAACTTCGATAGTTGGCA	31
ISLam-NT	1725	1323	1941	0.000780625	AGGTCTTCGACGTCGAAGAC(NT)	0
ISLam-T	0	0	0		CAAAGTGACGTGGCAGTTTA	32
ISLfe4-NT	\	1432	1614	0.000199433	AGGTCTTCGACGTCGAAGAC(NT)	0
ISLfe4-T	14	5	17		CAAAGTGACGTGGCAGTTTA	32
ISLru3-NT	1809	2322	1524	0.00127853	AGGTCTTCGACGTCGAAGAC(NT)	0
ISLru3-T	0	0	0		GACGACCAATAATAGTATCA	32
ISLhe7-NT	2131	2289	2399	8.1618e-06	AGGTCTTCGACGTCGAAGAC(NT)	0
ISLhe7-T	0	0	0		ACTAAGACCATCACGACGCA	32
ISLeq-NT	2036	2439	2439	0.158929	AGGTCTTCGACGTCGAAGAC(NT)	0
ISLeq-T	2916	2314	3134		GACGACCAATAATAGTATCA	32
ISLag4-NT	2635	2226	2669	7.08936e-05	AGGTCTTCGACGTCGAAGAC(NT)	0
ISLag4-T	76	106	93		GTTAAACGAAAATAATAACG	30
ISLre3-NT	1512	1446	1170	0.000726015	AGGTCTTCGACGTCGAAGAC(NT)	0
ISLre3-T	216	336	366		GATGAATATTAAGGACAATC	30
ISDra2-NT	1546	1230	1610	0.000296668	AGGTCTTCGACGTCGAAGAC(NT)	0
ISDra2-T	55	96	39		TTGCGCATGGATATAGTTAA	32
fig2. c
	Deletion efficiency(%)			Target sequence(5'-3')
ISLde6-T1	0.19	0.56	0.75	CTCAAATGAGCTTCAAATTG
ISLde6-T2	0.12	0.67	1.33	TAAATGCTCTTTTTGAATAT
ISLde6-T3	0	0.2	0	TGCATTTTCTGCCAACAACT
ISLde6-T4	3.45	4.76	4.87	GCTTGCGTCACTTCTCAATT
ISLde6-T5	1.89	2.95	2.54	TGGAATATCAGTTCTACCTG
ISLam-T1	0.55	0.31	0.59	TCAAAAATGGTATAGCAGTT
ISLam-T2	0.13	0.23	0.03	TTTGGGATGTTTTACTTGAA
ISLam-T3	0	0.1	0.38	AACCGCACATGCGGCAGACA
ISLam-T4	0.14	0.12	0	AAGATTTTGGCGTTCCATTT
ISLam-T5	0	0.24	0.13	TTCCACGCTTGCTTGCGGAA
ISLfe4-T1	0	0	0	TTTGGGATGTTTTACTTGAA
ISLfe4-T2	0	0	0	TCAAAAATGGTATAGCAGTT
ISLfe4-T3	1.2	1.56	3.33	AAGATTTTGGCGTTCCATTT
ISLfe4-T4	0	0	0	AACCGCACATGCGGCAGACA
ISLfe4-T5	0	0.12	0	TTCCACGCTTGCTTGCGGAA
ISLhe7-T1	0	0	0	CTTTTGTATGTTTGTCTCCA
ISLhe7-T2	0	0	0	GTGACCTACTTTTCTGTTAG
ISLhe7-T3	0	0.45	0	TAAAGCAAGAAGAAGAAGTT
ISLhe7-T4	0	0	0	TGATATACTTGTACAGCAAA
ISLhe7-T5	0.3	0	0	ACATGAAATGCTCCATAATA
ISDra2-T1	0.52	0	0.4	CTCAAATGAGCTTCAAATTG
ISDra2-T2	0.12	0.2	0	TAAATGCTCTTTTTGAATAT
ISDra2-T3	0.75	0.46	0.32	TGCATTTTCTGCCAACAACT
ISDra2-T4	1.01	1.46	2.37	GCTTGCGTCACTTCTCAATT
ISDra2-T5	0.14	0.89	0.59	TGGAATATCAGTTCTACCTG

## Sheet: fig.3
fig.3c
	ISLam cleavage ratio			ISLde6 cleavage ratio
On target	0.6	0.4	0.7	0.8	0.8	0.7
Mis-12	0.3	0	0	0.2	0.1	0
Mis-34	0	0	0	0	0.1	0.2
Mis-56	0	0.1	0.1	0.1	0	0.1
Mis-78	0	0	0	0	0.1	0.2
Mis-910	0.1	0.2	0.1	0.2	0	0.1
Mis-1112	0	0	0	0	0	0
Mis-1314	0	0	0	0.1	0	0.1
Mis-1516	0.6	0.6	0.4	0.6	0.6	0.7
Mis-1718	0.8	0.8	0.8	0.8	0.7	0.8
Mis-1920	0.7	0.8	0.7	0.8	0.7	0.8
Target sequence(5'-3')	GATGAATATTAAGGACAATC			GATGAATATTAAGGACAATC
fig.3d
	ISLde6 cleavage ratio (%)			ISLam cleavage ratio (%)
20℃	19.0816	23.5248	21.6654	20.9413	25.7517	26.6589	21.4239	24.4506
25℃	48.8642	37.5826	59.1635	52.4689	46.3981	30.3929	48.5368	43.0866
30℃	74.0676	47.219	83.0249	72.2936	68.7392	41.9485	68.1038	60.9938
37℃	81.0989	89.2264	89.1359	74.5719	79.084	76.9988	86.4871	76.8849
42℃	73.1172	71.6111	84.9871	71.3214	72.7477	80.3293	76.5718	74.7995
Target sequence(5'-3')	GATGAATATTAAGGACAATC			GATGAATATTAAGGACAATC
fig.3e
	ISLam interferency efficiency(%)			ISLde6 interferency efficiency(%)
10nt	39	30	23	38	45	36
12nt	34	37	23	50	68	40
14nt	60	65	70	72	77	79
16nt	93	79	79	85	80	72
18nt	96	95	92	98	90	87
20nt	97	85	89	99	90	94
22nt	81	98	90	88	88	88
24nt	96	94	97	88	88	85
26nt	94	92	94	97	97	96
28nt	96	96	98	82	96	96
30nt	95	95	93	45	55	35
Target sequence(5'-3')	listed in Supplemental table 2			listed in Supplemental table 2
fig.3f
TAM	ISLde6 cleavage ratio (%)
Ctrl（No target）	0	0	0
ttgat	76.06	59.99	71.42
atgat	65.76	67.66	68.08
ctgat	59.41	70.32	65.96
gtgat	\	66.13	67.1
tagat	63.23	64.61	66.55
tcgat	65.71	72.12	69.98
tggat	64.53	74.98	67.68
ttaat	15.45	15.02	7.23
tttat	65.35	25.31	32.17
ttcat	50.25	25.98	26.87
ttgtt	\	32.29	38.19
ttgct	68.36	69.09	60.47
ttggt	60.9	70.85	62.5
ttgaa	25.85	35.74	29.92
ttgac	64.61	71	62.66
ttgag	70.56	75.55	71.64
Target sequence(5'-3')	GATGAATATTAAGGACAATC
fig.3f
TAM	ISLam cleavage ratio(%)
Ctrl（No target）	0	0	0
tttaa	82.22	80.26	75.79
attaa	73.16	72.64	65.61
cttaa	55.78	46.8	50.3
gttaa	16.58	29.88	17.47
tataa	5.7	1.2	0.8
tctaa	0.9	1.832	0.392
tgtaa	2.397	3.273	2.598
ttaaa	6.142	0.46	6.38
tttaa	47.61	43.09	50.92
ttcaa	11.11	13.92	9.61
tttta	13.52	22.72	16.73
tttca	14.84	2.58	6.33
tttga	28.34	23.57	20.41
tttaa	11.57	0.1	7.09
tttac	13.17	15.77	6.85
tttag	10.74	12.96	7.85
Target sequence(5'-3')	GATGAATATTAAGGACAATC
fig.3g
TAM(3N)	ISLde6 cleavage ratio(%)
AAA	0	0	0
AAT	0	0.1	0
AAC	0.1	0	0
AAG	0	0	0
ATA	0	0.1	0
ATT	0	0	0
ATC	0.1	0	0
ATG	0	0	0
ACA	0	0	0
ACT	0	0	0
ACC	0	0	0
ACG	0	0	0
AGA	0	0	0
AGT	0	0	0
AGC	0	0	0
AGG	0	0	0
TAA	0	0	0
TAT	0.7	0.8	0.6
TAC	0	0	0
TAG	0	0	0
TTA	0	0	0
TTT	0	0	0
TTC	0	0	0
TTG	0	0	0
TCA	0	0	0.1
TCT	0.2	0.3	0.1
TCC	0	0	0
TCG	0.1	0	0
TGA	0	0	0
TGT	0.2	0.2	0.2
TGC	0	0	0
TGG	0	0	0
CAA	0	0	0
CAT	0.1	0.2	0
CAC	0	0	0
CAG	0	0	0
CTA	0	0	0.1
CTT	0	0	0
CTC	0	0	0
CTG	0	0	0
CCA	0	0	0
CCT	0.1	0	0
CCC	0	0	0
CCG	0	0	0
CGA	0	0	0.1
CGT	0	0.1	0
CGC	0	0	0
CGG	0	0	0.1
GAA	0	0	0
GAT	0.9	0.8	0.7
GAC	0.1	0	0
GAG	0.5	0.5	0.4
GTA	0	0.1	0
GTT	0.6	0.7	0.6
GTC	0	0	0
GTG	0.1	0	0
GCA	0	0	0
GCT	0.5	0.6	0.4
GCC	0	0.1	0
GCG	0.3	0.1	0.2
GGA	0.1	0.1	0.1
GGT	0.4	0.2	0
GGC	0	0	0
GGG	0.6	0.6	0.5
Target sequence(5'-3')	GATGAATATTAAGGACAATC

## Sheet: fig.4
fig.4c	Deletion efficiency(%)			p value(compare to wt group)	The multiple of increase(compared to Ctrl)
Ctrl	3.41	8.6	4.2	\	\
N4Y	3.45	3.53	3.75	0.8722	0.661937
G9F	100	96.83	99.02	<0.0001	18.2511
F45H	1.63	0	2.13	0.007	0.231956
P56Y	0.49	0.6	3.23	0.0125	0.266502
N62R	0.9	0.22	0	0.0003	0.0690932
K62E	1	0.33	0.62	0.0009	0.120296
Y66R	0	0	0	<0.0001	0
T68R	0	0	0	<0.0001	0
N69R	0	0	0	<0.0001	0
N69D	2	0	0.51	0.0018	0.154843
K70R	3.29	2.2	3.85	0.5363	0.576188
I71R	0	0	0	<0.0001	0
T73R	0	0.39	0	0.0001	0.0240592
G74R	0	0.25	0	0.0001	0.0154226
F75R	0	0	0	<0.0001	0
D78R	0	0	0	<0.0001	0
S94R	0.3	0	0	0.0001	0.0185071
S94E	0	0	2.34	0.0014	0.144355
H95E	3.41	0.23	1.25	0.0218	0.301666
T106K	2.41	0.4	2.34	0.0279	0.317705
T106E	1.56	2.91	1.87	0.0782	0.391117
T106N	0	2.76	0.22	0.003	0.183837
Q110K	2	0	1.2	0.0038	0.197409
K117R	1.41	1.04	0	0.0016	0.151141
M132R	0	0	0.18	<0.0001	0.0111043
Y151R	1.87	0	0	0.0008	0.115361
R152Y	0	0	0	<0.0001	0
S155R	0	0	0	<0.0001	0
R160K	8.11	1.92	2	0.9957	0.742134
N161K	0	0	1.15	0.0003	0.0709439
Q171R	0	0		0.0007	0
Q171K	1	2.34	0	0.0045	0.206046
Q171P	2.34	1.89	3.66	0.2401	0.486737
N190R	0	2.44	1.7	0.0104	0.255398
D207N	4.5	5.49	4.36	>0.9999	0.885256
K222R	0	0	0	<0.0001	0
F235Y	0	0	0	<0.0001	0
S236R	1.21	0		0.0044	0.0746453
S236Q	0	0	0	<0.0001	0
S236E	1.35	0	2.36	0.0066	0.228871
K240R	0.92	4.44	0	0.0338	0.33066
Q242R	3.23	0	0	0.004	0.19926
F260Y	0	0	0	<0.0001	0
R277E	0	0	0	<0.0001	0
D293R	0	0	0	<0.0001	0
L308R	0	0	0	<0.0001	0
R310H	0.21	1.03	0.23	0.0005	0.0906848
K314R	0	0	0	<0.0001	0
N321R	0	0	0	<0.0001	0
N325D	0	0	0	<0.0001	0
E350R	16.95	26.83	26.32	<0.0001	4.32449
E350N	2.67	2.92	0	0.0415	0.344849
E350K	16.4	17.8	20.89	<0.0001	3.39852
M351L	0	2.22	3.15	0.0341	0.331277
K362R	0	0	0	<0.0001	0
N365R	0	0	0	<0.0001	0
R367T	0.76	2.44	2.87	0.0627	0.37446
K372N	0	3	1.67	0.0177	0.288094
K372R	0	0	0	<0.0001	0
S382R	0.18	0	0	<0.0001	0.0111043
S382Y	0.92	0.49	0.47	0.0008	0.115978
L383K	0	0		0.0007	0
K386R	4.55	0	0	0.0157	0.280691
K386W	0.25	0	0.06	0.0001	0.019124
S400R	0	0	0	<0.0001	0
S400D	0	3.54	0.83	0.0131	0.269587
fig4. d	Deletion efficiency(%)
	TnpB			TnpB-G9F			TnpB-E350R			TnpB-G9F/E350R			p value(TnpB-G9F compared to TnpB)	The multiple of increase(TnpB-G9F compared to TnpB)	p value(TnpB-E350R compared to TnpB)	The multiple of increase(TnpB-E350R compared to TnpB)	p value(TnpB-G9F/E350R compared to TnpB)	The multiple of increase(TnpB-G9F/E350R compared to TnpB)	Target sequence(5'-3')
ADE2-1	0.19	0.12	0.24	5.98	16	15.38	2.29	1.28	2.44	6.7	9.95	4.96	0.0193532	67.9273	0.00763019	10.9273	0.00865276	39.2909	CTCAAATGAGCTTCAAATTG
ADE2-2	0.22	0.46	0.84	0.38	0.44	0.47	0.43	0.73	3.76	1.41	1.04	0.29	0.695882	0.848684	0.352719	3.23684	0.339913	1.80263	TAAATGCTCTTTTTGAATAT
ADE2-3	1.18	0.1	0.5	100	100	100	0.43	0.56	0.89	100	100	100	6.0679e-10	168.539	0.927402	1.05618	6.0679e-10	168.539	TGCATTTTCTGCCAACAACT
ADE2-4	5.32	4.78	6.12	100	100	100	47.65	55.67	40.71	100	100	100	1.72008e-09	18.4957	0.000603674	8.87978	1.72008e-09	18.4957	GCTTGCGTCACTTCTCAATT
ADE2-5	3.36	3.33	2.18	4.4	1.6	3.78	4.36	3.33	3.18	99.11	98.04	99.28	0.761561	1.10259	0.282298	1.22548	6.46002e-09	33.4194	TGGAATATCAGTTCTACCTG
																		296.43
																		8.87	33.4194
																		9.78	30.3098
																		10.87	27.2705

## Sheet: fig.5.
fig5. d	Cleavage ratio (%)
MgCl2 (mM)	TnpB			TnpB-G9F			TnpB-E350R			p value(TnpB vs TnpB-G9F)	p value(TnpB vs TnpB-E350R)
25	83	89	90	88	92	90	96	93	90	0.34142	0.111972
2.5	47	61	59	64	72	67	64	50	59	0.0726355	0.755262
0.25	43	59	55	59	67	62	62	47	57	0.125277	0.669489
0.1	8	15	15	44	51	48	41	35	39	0.000346846	0.000929981
0.025	11	18	19	34	40	31	36	29	31	0.00650113	0.00804989
0.01	9	12	11	28	33	33	32	27	29	0.000393694	0.000390584
Target sequence(5'-3')	GATGAATATTAAGGACAATC
fig5. e	Cleavage ratio (%)
Time (min)	TnpB			TnpB-G9F			TnpB-E350R
0min	0	0	0	0	0	0	0	0	0
0.5min	2	1	1	15	12	15	21	19	15
1min	9	3	3	19	15	13	29	25	29
2min	9	3	4	12	17	16	10	30	32
5min	9	6	7	22	20	19	29	43	40
10min	6	10	7	32	25	29	38	47	45
30min	5	16	15	22	41	39	50	50	48
60min	19	20	17	38	39	40	51	54	50
120min	34	26	25	50	41	45	52	58	53
Target sequence(5'-3')	GATGAATATTAAGGACAATC
fig5. f	Cleavage ratio (%)
Time (min)	TnpB			TnpB-G9F			TnpB-E350R
0min	0	0	0	0	0	0	0	0	0
0.5min	34	30	28	30	29	26	45	40	42
1min	48	39	32	39	35	30	51	49	50
2min	31	42	39	41	45	41	47	51	53
5min	43	42	41	48	50	45	56	51	57
10min	40	45	47	49	51	48	54	58	60
30min	54	46	49	61	55	51	50	59	65
60min	53	48	48	59	55	55	60	60	58
120min	59	47	47	66	52	54	70	64	60
Target sequence(5'-3')	GATGAATATTAAGGACAATC
fig5. g	Cleavage ratio (%)
Time (min)	TnpB			TnpB-G9F			TnpB-E350R
0min	0	0	0	0	0	0	0	0	0
0.5min	51	49	47	41	37	37	59	53	49
1min	62	52	51	43	38	41	61	59	55
2min	56	55	58	39	47	52	55	63	65
5min	64	60	63	61	53	59	61	67	70
10min	64	66	60	58	60	64	67	70	69
30min	66	68	59	60	63	61	75	77	65
60min	72	60	62	65	60	67	77	74	70
120min	67	63	60	68	62	61	78	80	72
Target sequence(5'-3')	GATGAATATTAAGGACAATC

## Sheet: fig.6
fig.6b	Deletion efficiency (%)			p value (compared withTnpB group)	The multiple of increase (compared withTnpB group)	Target sequence(5'-3')
TnpB	3.13	4.3	4.85	\	\	GCTTGCGTCACTTCTCAATT
TnpB-Sso7d	25.93	24.29	16.67	0.00327863	5.44707	GCTTGCGTCACTTCTCAATT
TnpB-ISLde6	5.51	1.59	5.49	0.944648	1.02524	GCTTGCGTCACTTCTCAATT
Sso7d-TnpB-Sso7d	0	0	\	0.00904237	\	GCTTGCGTCACTTCTCAATT
TnpB-T5E	91.74	88.87	94.13	1.64956e-06	22.373	GCTTGCGTCACTTCTCAATT
T5E-TnpB	0	0.12	0	0.495025	0.00977199	GCTTGCGTCACTTCTCAATT
TnpB-ExoIII	0	0.84	1.45	5.45211e-07	0.186482	GCTTGCGTCACTTCTCAATT
ExoIII-TnpB	1.4	0.26	1.2	0.0611885	0.232899	GCTTGCGTCACTTCTCAATT
fig.6c	Deletion efficiency (%)
	TnpB-T5E			TnpB-Sso7d-T5E			TnpB-T5E-Sso7d			p value(TnpB-T5E vs TnpB-Sso7d-T5E)	p value(TnpB-T5E vs TnpB-T5E-Sso7d)	p value(TnpB-Sso7d-T5E vs TnpB-T5E-Sso7d)	Target sequence(5'-3')
ADE2-1	2.47	2.51	1.35	10.18	12.34	15.21	5.39	6.16	0	0.00224979	0.428009	0.0227663	CTCAAATGAGCTTCAAATTG
ADE2-2	1.25	0.34	1.21	1.67	1.22	0.36	0.15	2.81	0	0.772828	0.95835	0.926935	TAAATGCTCTTTTTGAATAT
ADE2-3	0.36	0.24	0.17	1.22	0.67	1.12	0.1	0	0.7	0.0137573	0.966756	0.0560762	TGCATTTTCTGCCAACAACT
ADE2-4	90.1	75.78	87.23	90.8	96.34	98.22	50	85.71	86.67	0.0936848	0.469519	0.162269	GCTTGCGTCACTTCTCAATT
ADE2-5	11.56	8.34	10.25	75.36	55.64	63.45	25.37	19.05	16.57	0.00070579	0.0209123	0.00212619	TGGAATATCAGTTCTACCTG
fig. 6d	Integration efficiency (%)
	SpCas9			TnpB-G9F/E350R			FIRE-TnpB			p value(SpCas9 vs TnpB-G9F/E350R)	p value(FIRE-TnpB vs ISLde6-G9F/E350R	p value(FIRE-TnpB vs SpCas9)	SpCas9 target sequence(5'-3')	TnpB target sequence(5'-3')
NTS-1	5.49	2.11	4.78	3.2	3.76	4.87	17.67	11.15	13.32	0.880029	0.00695359	0.0103417	AGTATTTTTTTCATATCAA	ATGAAAAAAATACTACGAA
NTS-2	2	3.35	3.31	3.09	3.14	2.57	50.31	60.75	38.93	0.238221	0.0134164	0.0178113	TCGGAGGAGAATATCGGAGG	ATGTACAAACAATATCCTCC
NTS-3	3.24	5.91	4.43	2.6	1.54	4.56	20.26	30.24	15.23	0.927146	0.00171992	0.00172683	GATGATGGCAAGTTGCAGAG	GATGGCAAGTTGCAGAGAGG
fig.6e	Deletion efficiency (%)			Target sequence(5'-3')
S. cerevisiae M
ΔSpt23p-T1	95.45	85	80	CGACACGTTCAATTTGGCAG	3249bp	260.45	86.8167
ΔSpt23p-T2	100	90.91	95.23	ACATCTATTACAAACATAGG		286.14	95.38
ΔSpt23p-T3	95	91.67	84.21	AGCAATTGTAATAACAACAA		270.88	90.2933
						0	0
S. cerevisiae MP						0	0
ΔFps1p-T1	80.95	93.33	73.33	GATGTGGCATTGGGCTGGGC	2010bp	247.61	82.5367
ΔFps1p-T2	95.23	80	69.23	CGGTGCCTTCACAGGCGCTT		244.46	81.4867
ΔFps1p-T3	91.67	85	88.46	GATgtttattttgattttca		265.13	88.3767
						0	0
S. cerevisiae CEN.PK2-1c						0	0
ΔATF2-T1	100	95.23	100	ctgAGCTCTGATTTGTTCTA	1608bp	295.23	98.41
ΔATF2-T2	90.91	88.89	95	TATGATGAAGAGTTCATCGA		274.8	91.6
ΔATF2-T3	97.5	95.45	75	TTTATCGTtgaaaacaagaa		267.95	89.3167
						0	0
S. cerevisiae S288C						0	0
ΔCAN1-T1	88.89	75	100	ggaagcgacccagaactcga	1809bp	263.89	87.9633
ΔCAN1-T2	100	95	100	taacgctgccttcacatttc		295	98.3333
ΔCAN1-T3	91.67	88.46	97.56	agaccaaataaaatacggga		277.69	92.5633
						0	0
P. acidilactici LA412						0	0
ΔpyrE-T1	97.56	97.5	100	ATTCCTAACACGGTGGAAAA	684bp	295.06	98.3533
ΔpyrE-T2	95.23	95	100	TTGTTCACCGCACGAAGTTG		290.23	96.7433
ΔpyrE-T3	95	100	93.75	TGCGTTGGATTTTGAAAGTG		288.75	96.25
						0	0
L. reuteri 03						0	0
ΔlacZ-T1	97.56	100	100	GCGTTCCCTAAAACACCAGC	1580	297.56	99.1867
ΔlacZ-T2	88.88	88.89	95.45	tatttacgttttcaatcgac		273.22	91.0733
ΔlacZ-T3	90.91	100	95.23	agcgcgcctttaaccattgc		286.14	95.38
						0	0
L. reuteri H1-2					1239bp	0	0
ΔpduP-T1	100	97.56	95	GCTACCGCTGATATTGACTT		292.56	97.52
ΔpduP-T2	100	95.45	100	GACGCAATTGCTGCTGCTAA		295.45	98.4833
ΔpduP-T3	100	100	100	GCCAATCTTACCAGTTGTTT		300	100
						0	0
L. lactis LL09						0	0
ΔnisinRK-T1	90.91	84.62	84.21	CAGGTTCTGAATAACTTATA	2019bp	259.74	86.58
ΔnisinRK-T2	93.33	84.21	95.23	TCCTCTTGTTCAGGAAAAGT		272.77	90.9233
ΔnisinRK-T3	100	95.23	97.5	tataagaaattgaacgaagc		292.73	97.5767
						0	0
E.coliMG 1655					2182bp	0	0
ΔmaeB-T1	97.5	100	100	GTATTTGACATTGAAGTTGA		297.5	99.1667
ΔmaeB-T2	95	100	91.67	CTGCAAGCCCAGTTTCTGAA		286.67	95.5567
ΔmaeB-T3	97.5	95.45	100	GGTGAAATGCACGGCGATGC		292.95	97.65
						0	0
B. subtilis SCK6					1980bp	0	0
Δamy-T1	50	60	80.95	tcccttcctttacttggtta		190.95	63.65
Δamy-T2	69.23	80	62.06	agagacagaggatgaacctg		211.29	70.43
Δamy-T3	50	60.71	48	cattgaaagaatgtgttaca		158.71	52.9033

## Sheet: figs.1
fig1. a, b	Number
#family	genome containing TnpB	Types of tnpB (70% cluster)
Enterobacteriaceae	10434	19
Bacillaceae	2474	170
Lactobacillaceae	1428	97
Peptostreptococcaceae	1170	24
Burkholderiaceae	931	27
Enterococcaceae	578	10
Clostridiaceae	571	62
Morganellaceae	394	10
Streptomycetaceae	364	49
Moraxellaceae	287	22

## Sheet: figs.2
figs.2a
TnpB	the copy number in orignal genome
SisTnpB	1
ISDra2	7
ISDge10	1
ISAba30	1
ISTfu1	2
ISLde4	5
ISLde5	8
ISLde6	3
ISLag3	12
ISLhe6	5
ISLam	22
ISLfe4	16
ISLru3	12
ISLhe7	16
ISLeq	3
ISLag4	11
ISLre3	4
ISLke	4
ISLin	7
ISLsa	3
ISCfu	3
ISCal	4
ISLac	7
ISLde	4
ISLcr	5
ISSha	3
ISLmu	7
ISLcr2	3
ISLca	7
ISAco	8
ISLmu2	5
ISLko	7
ISCsp	3
ISSpa	3
ISSsi	4
ISLmu3	8
ISLsa2	4
ISLpa	4
ISSsi2	8
ISSha2	3
ISSha3	6
ISLru2	16
ISLba	8
ISLfe2	13
ISLpa2	5
ISCfu2	6
ISLhi	6
ISLac2	4
ISSpe	6
ISLdo	3
ISLsp	4
ISLsp2	7
ISLde2	3
ISLhe3	7
ISLde3	3
ISLfe3	4
ISLfe	4
ISLhe4	4
ISLfe5	4
ISLan	3
ISLin2	3
ISLhe5	6
ISLru	4
ISLag	3
ISLpa3	3
ISLhe	4
ISLag2	4
ISLre2	10
ISLhe2	3
ISLre	3
figs.2a
TnpB	TAM	reRNA(5'-3', without guide sequence)
ISLde4	AAGGG	GAAGCATGGCGAATTCTTTGACTGTGCGTATGATAAAAGCATCAGAAGCTAGGGCTCCCCCTAGTGGAGGTGCATACAACCGAACGCACAAGGCATTTCCTCGTGAAAAAGCCTAAAAAAATCCTCTAGCTTCGGCTAGAGGACAAGAATGTGTTTATTGCTATTCACCTGAATAGCATTGGATATGTTTTTGAATTCGG
ISLde5	AAAAG	GGCAGATAAAAAGCTATTGGATAAATGCCATTTGGCGTTATTTGACAGCCAACCGTACTCACTGACCTTAACTTCAAAAGGTTAAAAATCTGATTTCTTTTGCCAAGTTGAATCTACTCATAGATTTAACTAGAAAGGAATATCAGAAAAACTTACCAATATTGATGTGATTATCAAGATTTAGTAAGTTTTATGATTCGG
ISLde6	TTGAT	GGCGAAACGGAACAATCGTCCTTAGCACTAGACGGTGTTATCTGCGTAATCTTCTGAGCGAGTCAAAACGAAGACGAGATGACATTGGGCAGTTGTGAAACTAACCTAAACACTCTGAGTACTTCTAAGAGTTGTCGATCTTACGTGTAATGTGTTGGGTGGCCCCCAGATTCCTGCGACTTTAGTCGTAGGAGGTTCAA
ISLag3	TTCAT	TCCAACTATTGGGTACGCAATATATTAGTGGGCAAGAACAACCTAAATTTGAATTAACAACTAATGCGTAAACGTGTTAGTTAAGTGGGTGCTGTCAACCACCCAATGATGTAGCCACGTATAGTGTGGAAGCAATTAATTGCGTTATGACCACTGACCGTAAGGTCGTGAGCTACAAGCCTCTCACTTTAGTGAGGGGTAGTTGA
ISLhe6	ATATA	GCGTCCACTTGACAAACGAAAATAGCTTGGCGACTGGCTTTAGCTGGGTTGACGCTGTTGTAAAGTTGTCCTTATAGCTTCGGTTATTATCATAGATAAACGGAGTGTTTTAAAAAGGTTAACGGCAGATATTGGCTAAAAAAAGTTGCATTCTTAGGAAAATAGGGTCATTTGAAGCAAAATGACTGTATTGACCTAATATTTTCTAACAT
ISLam	TTTAA	AAAGGCTGCAGTCCGTTAGCAACTTGCGGACTTAAAAGGCTTTGGTAATTAGACGACCTCTATCGGCAATAGTCAAAAGACTATTGCTGGTAAGTCAAGTCCGTATCTAAGCAAGTTGGTGTTCTGGTTAGCGCAAGCTAACGAGCCACTAAGCCCTAGACTTCAGTCTAGGGTAGTTGAC
ISLfe4	TTTAA	TAGCTAAACTAGCCTAGCTTATCTGTCCCTATGGCAACCTGGGGACATAAAAGGCGTTGGTAATTAGACGACCGCTATTTGATTACAATTTCAGTTAGTCAAATAAGTTGTCCCTATCTACGCAAATTGTGGTTCGAAATCCGTGATGATATTCGGCTCACAAGCCACTGACTTTAGTCAGTGGTGGTTGAC
ISLru3	TTCAT	CACGCAATATGTTAGTGGCAATGAACGCCCGTCTTTCAACAAATTAACAGCCGGTGAGTAAATCTCGTTGGCTAAACGGGTGTGTCGTCAACCACCCGATGATGTAGCCACATCGTGAAGAAGCACATTAGTGCGTTACTACTTCTAAGCCGTTAGGCTTGTGAGCTACAAGCCATCGATTTTAATCGGTGGTAGTTGAC
ISLhe7	TTTTT	GTCAAACCAAGCATGATCGAGATATTAATGCGGCAGTTAATATCTTGCATAAAGGAAGTACAAAGCTAAATGGTCAGGGACTGGCCATGGTAACAAGCTGAGTTCCGTGAGTTAGGTATTTGACTAGTTCAATGTAAGATCCTAAACACTACTCAGTGTTCCCAGAAACCCGTCACTTTAGTGCCGGTGTAGTTCAT
ISLeq	TTCAT	CCAACTTATCAAAAATTAGTCTAGTGTATAAATTATGCTAGACCGCCGTACCTATCAACGTGCGGAAACGTCTTTTGACGTTTGAGAAGCAACAGCGTAAAAGACTTTTAGCCTTTGGTTGTGGGAGAGTTTATTTACTCGCTTGTACCACGACTAGTTAGTTGCAAACCTGGGAATTTATTCCCAGGTAGTTGATT
ISLag4	GGAGG	TGCTTTACTGTAAAAATAAACGGGGTGGGCTACACCCTTAAGCTACAAGAGTCAGTCACTGTCATTACCCCCTAGTTGGGATATGGGAATACTGGTGTTGACGGTAGTAAATAAAATTAAGAAAGGAAGGCTATATTCTTTCTGATAATGTAGAAGAAGCTACACGCTTTTCTATGTTATTCTACATTTTATATAGCAGG
ISLre3	TTTAT	ATATTAACGCTGCACAAGTCATCTTGCAAAAAGGATTAGCTATCCGATAGATAAAGTTAGGCTCGGGACGAGCCTTGGCTAATAGTCGTAACCTCTGCTTGAAGGTTCGTTCAGAATCGGTAGGGTAAGTATGCGATGTTTCCAGAATCTCCCACTTCAAGCATTAAACCGTAGGTTTAGCTAAGTGGGAGTAGTTCAAT

## Sheet: figs.6
figs.6a	Integration efficiency (%)
	SpCas9			TnpB-G9F/E350R			p value	Taget sequence of SpCas9(5'-3')	Target sequence ofTnpB-G9F/E350R (5'-3')
T1	75	93.75	87.5	73.33	80.59	80	0.281421	ATGTTCTGAGACGTAAGAAA	GTTAGTGTCAAAAATTATAT
T2	89.54	78.75	75	67.14	68.75	89.82	0.528821	TTTGGCTTTGATTTTGGCAT	TTTGGCATCGGTTCGGTTCT
figs. 6c	Cumulative mass loss (g)
	WT			WT::GlcA
24h	4.35	2.02	3.87	4.88	6.53	7.25
48h	4.87	6.56	4.21	17.21	19.01	16.82
72h	5.42	5.21	7.89	20.39	23.45	22.21
figs. 6d	Residual reducing sugar (g/L)
WT	497.819	438.15	438.15
WT::GlcA	40.3752	39.5826	27.5527
figs.6e	Integration efficiency (%)			Target sequence (5'-3')	PAM/TAM
SpCas9	6.79	8.67	8.33	GATGATGGCAAGTTCCAGAG	3'-AGG
FIRE-TnpB	67.62	38.33	45.89	GATGGCAAGTTCCAGAGAGG	5'-ATGAT
