# Supplementary material
Source: Research Square preprint supplement (doi:10.21203/rs.3.rs-9485642/v1)
Supplement: Supplementary file 3 [file d2e00b655cc4a0d5b467152e.xlsx]

## Sheet: fig.2
fig.2
Strains	Characteristic
Escherichia. coli DH5α	Host for plasmid construction
Escherichia. coli Rosetta	Host for protein purification
Limosilactobacillus. reuteri 03	Lab isolated
Lactococcus lactis LL09	Lab isolated
Saccharomyces cerevisiae S288C	Haploid yeast,MATα+ SUC2+ gal2+ mal2+ mel+ flo1+ flo8-1+ hap1+ ho+ bio1+ bio6+
Saccharomyces cerevisiae M	Polyploid yeast
Plasmid	description	guide sequecne(5'→3')	figure
Genome interference and editing plasmids for lactic acid bacteria
pMG36c2	Shuttle vector for L. reuteri and E. coli	\
pMG36e2	Shuttle vector for L. lactis and E. coli	\
pMG36c2-ISLde4-ωRNA-NT	Control plasmid in ISLde4-based L. reuteri 03 genome interference experiments, without guide sequence	AGGTCTTCGACGTCGAAGAC(NT)	fig.2b
pMG36c2-ISLde4-ωRNA-T	Testing plasmid in ISLde4-based L. reuteri 03 genome interference experiments, with guide sequence	TGCGCATACTGCAGCTAATT	fig.2b
pMG36c2-ISLde5-ωRNA-NT	Control plasmid in ISLde5-based L. reuteri 03 genome interference experiments, without guide sequence	AGGTCTTCGACGTCGAAGAC(NT)	fig.2b
pMG36c2-ISLde5-ωRNA-T	Testing plasmid in ISLde5-based L. reuteri 03 genome interference experiments, with guide sequence	CTAGATTTTCGCGATTTACC	fig.2b
pMG36c2-ISLde6-ωRNA-NT	Control plasmid in ISLde6-based L. reuteri 03 genome interference experiments, without guide sequence	AGGTCTTCGACGTCGAAGAC(NT)	fig.2b
pMG36c2-ISLde6-ωRNA-T	Testing plasmid in ISLde6-based L. reuteri 03 genome interference experiments, with guide sequence	TTGCGCATGGATATAGTTAA	fig.2b
pMG36c2-ISLag3-ωRNA-NT	Control plasmid in ISLag3-based L. reuteri 03 genome interference experiments, without guide sequence	AGGTCTTCGACGTCGAAGAC(NT)	fig.2b
pMG36c2-ISLag3-ωRNA-T	Testing plasmid in ISLag3-based L. reuteri 03 genome interference experiments, with guide sequence	GACGACCAATAATAGTATCA	fig.2b
pMG36c2-ISLhe6-ωRNA-NT	Control plasmid in ISLhe6-based L. reuteri 03 genome interference experiments, without guide sequence	AGGTCTTCGACGTCGAAGAC(NT)	fig.2b
pMG36c2-ISLhe6-ωRNA-T	Testing plasmid in ISLhe6-based L. reuteri 03 genome interference experiments, with guide sequence	GTTAACTTCGATAGTTGGCA	fig.2b
pMG36c2-ISLam-ωRNA-NT	Control plasmid in ISLam-based L. reuteri 03 genome interference experiments, without guide sequence	AGGTCTTCGACGTCGAAGAC(NT)	fig.2b
pMG36c2-ISLam-ωRNA-T	Testing plasmid in ISLam-based L. reuteri 03 genome interference experiments, with guide sequence	CAAAGTGACGTGGCAGTTTA	fig.2b
pMG36c2-ISLfe4-ωRNA-NT	Control plasmid in ISLfe4-based L. reuteri 03 genome interference experiments, without guide sequence	AGGTCTTCGACGTCGAAGAC(NT)	fig.2b
pMG36c2-ISLfe4-ωRNA-T	Testing plasmid in ISLfe4-based L. reuteri 03 genome interference experiments, with guide sequence	CAAAGTGACGTGGCAGTTTA	fig.2b
pMG36c2-ISLru3-ωRNA-NT	Control plasmid in ISLru3-based L. reuteri 03 genome interference experiments, without guide sequence	AGGTCTTCGACGTCGAAGAC(NT)	fig.2b
pMG36c2-ISLru3-ωRNA-T	Testing plasmid in ISLru3-based L. reuteri 03 genome interference experiments, with guide sequence	GACGACCAATAATAGTATCA	fig.2b
pMG36c2-ISLhe7-ωRNA-NT	Control plasmid in ISLhe7-based L. reuteri 03 genome interference experiments, without guide sequence	AGGTCTTCGACGTCGAAGAC(NT)	fig.2b
pMG36c2-ISLhe7-ωRNA-T	Testing plasmid in ISLhe7-based L. reuteri 03 genome interference experiments, with guide sequence	ACTAAGACCATCACGACGCA	fig.2b
pMG36c2-ISLeq-ωRNA-NT	Control plasmid in ISLeq-based L. reuteri 03 genome interference experiments, without guide sequence	AGGTCTTCGACGTCGAAGAC(NT)	fig.2b
pMG36c2-ISLeq-ωRNA-T	Testing plasmid in ISLeq-based L. reuteri 03 genome interference experiments, with guide sequence	GACGACCAATAATAGTATCA	fig.2b
pMG36c2-ISLag4-ωRNA-NT	Control plasmid in ISLag4-based L. reuteri 03 genome interference experiments, without guide sequence	AGGTCTTCGACGTCGAAGAC(NT)	fig.2b
pMG36c2-ISLag4-ωRNA-T	Testing plasmid in ISLag4-based L. reuteri 03 genome interference experiments, with guide sequence	GTTAAACGAAAATAATAACG	fig.2b
pMG36c2-ISLre3-ωRNA-NT	Control plasmid in ISLre3-based L. reuteri 03 genome interference experiments, without guide sequence	AGGTCTTCGACGTCGAAGAC(NT)	fig.2b
pMG36c2-ISLre3-ωRNA-T	Testing plasmid in ISLre3-based L. reuteri 03 genome interference experiments, with guide sequence	GATGAATATTAAGGACAATC	fig.2b
pMG36c2-ISDra2-ωRNA-NT	Control plasmid in ISDra2-based L. reuteri 03 genome interference experiments, without guide sequence	AGGTCTTCGACGTCGAAGAC(NT)	fig.2b
pMG36c2-ISDra2-ωRNA-T	Testing plasmid in ISDra2-based L. reuteri 03 genome interference experiments, with guide sequence	TTGCGCATGGATATAGTTAA	fig.2b
pMG36e2-ISLde6-LR	Control plasmid for lacZ knockout, used to investigate knockout occurrence in the absence of a guide	AGGTCTTCGACGTCGAAGAC(NT)	fig.2d
pMG36e2-ISLde6-lacZ-T1-LR	ISLde6-mediated lacZ knockout plasmid for L. reuteri 03, targeting lacZ-T1	GCGTTCCCTAAAACACCAGC	fig.2d
pMG36e2-ISLde6-lacZ-T2-LR	ISLde6-mediated lacZ knockout plasmid for L. reuteri 03, targeting lacZ-T2	ATCGTTCTTGCAACTTCAAC	fig.2d
pMG36c2-ISLde6-LR	Control plasmid for nisinRK knockout, used to investigate knockout occurrence in the absence of a guide	AGGTCTTCGACGTCGAAGAC(NT)	fig.2e
pMG36c2-ISLde6-nisinRK-T1-LR	ISLde6-mediated nisinRK knockout plasmid for L. lactis LL09, targeting lacZ-T1	CAGGTTCTGAATAACTTATA	fig.2e
pMG36c2-ISLde6-nisinRK-T2-LR	ISLde6-mediated nisinRK knockout plasmid for L. lactis LL09, targeting lacZ-T1	TCCTCTTGTTCAGGAAAAGT	fig.2e
Genome editing plasmids for S. cerevisiae	description	guide sequence(5'→3')	figure
pSMC	Shuttle vector for S. cerevisiae and E. coli		\
pSMC-ISLde6-T1	ISLde6-mediated knockout plasmid for the ADE2 gene in S. cerevisiae S288C, using the guide ISLde6-T1	CTCAAATGAGCTTCAAATTG	fig.2c
pSMC-ISLde6-T2	ISLde6-mediated knockout plasmid for the ADE2 gene in S. cerevisiae S288C, using the guide ISLde6-T2	TAAATGCTCTTTTTGAATAT	fig.2c
pSMC-ISLde6-T3	ISLde6-mediated knockout plasmid for the ADE2 gene in S. cerevisiae S288C, using the guide ISLde6-T3	TGCATTTTCTGCCAACAACT	fig.2c
pSMC-ISLde6-T4	ISLde6-mediated knockout plasmid for the ADE2 gene in S. cerevisiae S288C, using the guide ISLde6-T4	GCTTGCGTCACTTCTCAATT	fig.2c
pSMC-ISLde6-T5	ISLde6-mediated knockout plasmid for the ADE2 gene in S. cerevisiae S288C, using the guide ISLde6-T5	TGGAATATCAGTTCTACCTG	fig.2c
pSMC-ISLam-T1	ISLam-mediated knockout plasmid for the ADE2 gene in S. cerevisiae S288C, using the guide ISLam-T1	TCAAAAATGGTATAGCAGTT	fig.2c
pSMC-ISLam-T2	ISLam-mediated knockout plasmid for the ADE2 gene in S. cerevisiae S288C, using the guide ISLam-T2	TTTGGGATGTTTTACTTGAA	fig.2c
pSMC-ISLam-T3	ISLam-mediated knockout plasmid for the ADE2 gene in S. cerevisiae S288C, using the guide ISLam-T3	AACCGCACATGCGGCAGACA	fig.2c
pSMC-ISLam-T4	ISLam-mediated knockout plasmid for the ADE2 gene in S. cerevisiae S288C, using the guide ISLam-T4	AAGATTTTGGCGTTCCATTT	fig.2c
pSMC-ISLam-T5	ISLam-mediated knockout plasmid for the ADE2 gene in S. cerevisiae S288C, using the guide ISLam-T5	TTCCACGCTTGCTTGCGGAA	fig.2c
pSMC-ISLfe4-T1	ISLfe4-mediated knockout plasmid for the ADE2 gene in S. cerevisiae S288C, using the guide ISLfe4-T1	TTTGGGATGTTTTACTTGAA	fig.2c
pSMC-ISLfe4-T2	ISLfe4-mediated knockout plasmid for the ADE2 gene in S. cerevisiae S288C, using the guide ISLfe4-T2	TCAAAAATGGTATAGCAGTT	fig.2c
pSMC-ISLfe4-T3	ISLfe4-mediated knockout plasmid for the ADE2 gene in S. cerevisiae S288C, using the guide ISLfe4-T3	AAGATTTTGGCGTTCCATTT	fig.2c
pSMC-ISLfe4-T4	ISLfe4-mediated knockout plasmid for the ADE2 gene in S. cerevisiae S288C, using the guide ISLfe4-T4	AACCGCACATGCGGCAGACA	fig.2c
pSMC-ISLfe4-T5	ISLfe4-mediated knockout plasmid for the ADE2 gene in S. cerevisiae S288C, using the guide ISLfe4-T5	TTCCACGCTTGCTTGCGGAA	fig.2c
pSMC-ISLhe7-T1	ISLhe7-mediated knockout plasmid for the ADE2 gene in S. cerevisiae S288C, using the guide ISLhe7-T1	CTTTTGTATGTTTGTCTCCA	fig.2c
pSMC-ISLhe7-T2	ISLhe7-mediated knockout plasmid for the ADE2 gene in S. cerevisiae S288C, using the guide ISLhe7-T2	GTGACCTACTTTTCTGTTAG	fig.2c
pSMC-ISLhe7-T3	ISLhe7-mediated knockout plasmid for the ADE2 gene in S. cerevisiae S288C, using the guide ISLhe7-T3	TAAAGCAAGAAGAAGAAGTT	fig.2c
pSMC-ISLhe7-T4	ISLhe7-mediated knockout plasmid for the ADE2 gene in S. cerevisiae S288C, using the guide ISLhe7-T4	TGATATACTTGTACAGCAAA	fig.2c
pSMC-ISLhe7-T5	ISLhe7-mediated knockout plasmid for the ADE2 gene in S. cerevisiae S288C, using the guide ISLhe7-T5	ACATGAAATGCTCCATAATA	fig.2c
pSMC-ISDra2-T1	ISDra2-mediated knockout plasmid for the ADE2 gene in S. cerevisiae S288C, using the guide ISDra2-T1	CTCAAATGAGCTTCAAATTG	fig.2c
pSMC-ISDra2-T2	ISDra2-mediated knockout plasmid for the ADE2 gene in S. cerevisiae S288C, using the guide ISDra2-T2	TAAATGCTCTTTTTGAATAT	fig.2c
pSMC-ISDra2-T3	ISDra2-mediated knockout plasmid for the ADE2 gene in S. cerevisiae S288C, using the guide ISDra2-T3	TGCATTTTCTGCCAACAACT	fig.2c
pSMC-ISDra2-T4	ISDra2-mediated knockout plasmid for the ADE2 gene in S. cerevisiae S288C, using the guide ISDra2-T4	GCTTGCGTCACTTCTCAATT	fig.2c
pSMC-ISDra2-T5	ISDra2-mediated knockout plasmid for the ADE2 gene in S. cerevisiae S288C, using the guide ISDra2-T5	TGGAATATCAGTTCTACCTG	fig.2c
donor used for S. cerevisiae editing	description	sequence(5'→3')	Figure
donor used for ADE2 deletion	L arm and R arm designed for ADE2 deletion	TTTAAGAGATATTAAATATTAGTGAGAAGCCGAGAATTTTGTAACACCAACATAACACTGACATCTTTAACAACTTTTAATTATGATACATTTCTTACGTCATGATTGATTATTACAGCTATGCTGACAAATGACTCTTGTTGCATGGCTACGAACCGGGTAATACTAAGTGATTGACTCTTGCTGACCTTTTATTAAGAACTAAATGGACAATATTATGGAGCATTTCATGTATAAATTGGTGCGTAAAATCGTTGGATCTCTCTTCTAAGTACATCCTACTATAACAATCAAGAAAAACAAGAAAATCGGACAAAACAATCAAGTATGGATTCTAGAACAGTTGGTATATTAGGAGGGGGACAATTGGGACGTATGATTGTTGAGGCAGCAAACAGG…	fig.2c

## Sheet: fig.3
fig.3
Cleavage substrates	sequence (5'→3')		Figure
ISLde6/ISLam cleavage dsDNA substrate, without TAM but with target	TCAGTGGAACGAAAACTCACGTTAAGGGATTTTGGTCATGAGATTATCAAAAAGGATCTTCACCTAGATCCTTTTAAATTAAAAATGAAGTTTTAAATCAATCTAAAGTATATATGAGTAAACTTGGTCTGACAGTTACCAATGCTTAATCAGTGAGGCACCTATCTCAGCGATCTGTCTATTTCGTTCATCCATAGTTGCCTGACTCCCCGTCGTGTAGATAACTACGATACGGGAGGGCTTACCATCTGGCCCCAGTGCTGCAATGATACCGCGAGACCCACGCTCACCGGCTCCAGATTTATCAGCAATAAACCAGCCAGCCGGAAGGGCCGAGCGCAGAAGTGGTCCTGCAACTTTATCCGCCTCCATCCAGTCTATTAATTGTTGCCGGGAAGC…		fig.3a
ISLde6/ISLam cleavage dsDNA substrate, without TAM and target	TCAGTGGAACGAAAACTCACGTTAAGGGATTTTGGTCATGAGATTATCAAAAAGGATCTTCACCTAGATCCTTTTAAATTAAAAATGAAGTTTTAAATCAATCTAAAGTATATATGAGTAAACTTGGTCTGACAGTTACCAATGCTTAATCAGTGAGGCACCTATCTCAGCGATCTGTCTATTTCGTTCATCCATAGTTGCCTGACTCCCCGTCGTGTAGATAACTACGATACGGGAGGGCTTACCATCTGGCCCCAGTGCTGCAATGATACCGCGAGACCCACGCTCACCGGCTCCAGATTTATCAGCAATAAACCAGCCAGCCGGAAGGGCCGAGCGCAGAAGTGGTCCTGCAACTTTATCCGCCTCCATCCAGTCTATTAATTGTTGCCGGGAAGC…		fig.3a
ISLde6 cleavage dsDNA substrate, with TAM and target	TCAGTGGAACGAAAACTCACGTTAAGGGATTTTGGTCATGAGATTATCAAAAAGGATCTTCACCTAGATCCTTTTAAATTAAAAATGAAGTTTTAAATCAATCTAAAGTATATATGAGTAAACTTGGTCTGACAGTTACCAATGCTTAATCAGTGAGGCACCTATCTCAGCGATCTGTCTATTTCGTTCATCCATAGTTGCCTGACTCCCCGTCGTGTAGATAACTACGATACGGGAGGGCTTACCATCTGGCCCCAGTGCTGCAATGATACCGCGAGACCCACGCTCACCGGCTCCAGATTTATCAGCAATAAACCAGCCAGCCGGAAGGGCCGAGCGCAGAAGTGGTCCTGCAACTTTATCCGCCTCCATCCAGTCTATTAATTGTTGCCGGGAAGC…		fig.3a
ISLam cleavage dsDNA substrate, with TAM and target	TCAGTGGAACGAAAACTCACGTTAAGGGATTTTGGTCATGAGATTATCAAAAAGGATCTTCACCTAGATCCTTTTAAATTAAAAATGAAGTTTTAAATCAATCTAAAGTATATATGAGTAAACTTGGTCTGACAGTTACCAATGCTTAATCAGTGAGGCACCTATCTCAGCGATCTGTCTATTTCGTTCATCCATAGTTGCCTGACTCCCCGTCGTGTAGATAACTACGATACGGGAGGGCTTACCATCTGGCCCCAGTGCTGCAATGATACCGCGAGACCCACGCTCACCGGCTCCAGATTTATCAGCAATAAACCAGCCAGCCGGAAGGGCCGAGCGCAGAAGTGGTCCTGCAACTTTATCCGCCTCCATCCAGTCTATTAATTGTTGCCGGGAAGC…		fig.3a
Cleavage substrates with mismatch target squence	sequence (5'→3')
ISLde6 cleavage dsDNA substrate,on target	TCAGTGGAACGAAAACTCACGTTAAGGGATTTTGGTCATGAGATTATCAAAAAGGATCTTCACCTAGATCCTTTTAAATTAAAAATGAAGTTTTAAATCAATCTAAAGTATATATGAGTAAACTTGGTCTGACAGTTACCAATGCTTAATCAGTGAGGCACCTATCTCAGCGATCTGTCTATTTCGTTCATCCATAGTTGCCTGACTCCCCGTCGTGTAGATAACTACGATACGGGAGGGCTTACCATCTGGCCCCAGTGCTGCAATGATACCGCGAGACCCACGCTCACCGGCTCCAGATTTATCAGCAATAAACCAGCCAGCCGGAAGGGCCGAGCGCAGAAGTGGTCCTGCAACTTTATCCGCCTCCATCCAGTCTATTAATTGTTGCCGGGAAGC…		fig.3c,3d
ISLde6 cleavage dsDNA substrate,mismatch on the 1-2 base of taget sequence	TCAGTGGAACGAAAACTCACGTTAAGGGATTTTGGTCATGAGATTATCAAAAAGGATCTTCACCTAGATCCTTTTAAATTAAAAATGAAGTTTTAAATCAATCTAAAGTATATATGAGTAAACTTGGTCTGACAGTTACCAATGCTTAATCAGTGAGGCACCTATCTCAGCGATCTGTCTATTTCGTTCATCCATAGTTGCCTGACTCCCCGTCGTGTAGATAACTACGATACGGGAGGGCTTACCATCTGGCCCCAGTGCTGCAATGATACCGCGAGACCCACGCTCACCGGCTCCAGATTTATCAGCAATAAACCAGCCAGCCGGAAGGGCCGAGCGCAGAAGTGGTCCTGCAACTTTATCCGCCTCCATCCAGTCTATTAATTGTTGCCGGGAAGC…		fig.3c
ISLde6 cleavage dsDNA substrate,mismatch on the 3-4 base of taget sequence	TCAGTGGAACGAAAACTCACGTTAAGGGATTTTGGTCATGAGATTATCAAAAAGGATCTTCACCTAGATCCTTTTAAATTAAAAATGAAGTTTTAAATCAATCTAAAGTATATATGAGTAAACTTGGTCTGACAGTTACCAATGCTTAATCAGTGAGGCACCTATCTCAGCGATCTGTCTATTTCGTTCATCCATAGTTGCCTGACTCCCCGTCGTGTAGATAACTACGATACGGGAGGGCTTACCATCTGGCCCCAGTGCTGCAATGATACCGCGAGACCCACGCTCACCGGCTCCAGATTTATCAGCAATAAACCAGCCAGCCGGAAGGGCCGAGCGCAGAAGTGGTCCTGCAACTTTATCCGCCTCCATCCAGTCTATTAATTGTTGCCGGGAAGC…		fig.3c
ISLde6 cleavage dsDNA substrate,mismatch on the 5-6 base of taget sequence	TCAGTGGAACGAAAACTCACGTTAAGGGATTTTGGTCATGAGATTATCAAAAAGGATCTTCACCTAGATCCTTTTAAATTAAAAATGAAGTTTTAAATCAATCTAAAGTATATATGAGTAAACTTGGTCTGACAGTTACCAATGCTTAATCAGTGAGGCACCTATCTCAGCGATCTGTCTATTTCGTTCATCCATAGTTGCCTGACTCCCCGTCGTGTAGATAACTACGATACGGGAGGGCTTACCATCTGGCCCCAGTGCTGCAATGATACCGCGAGACCCACGCTCACCGGCTCCAGATTTATCAGCAATAAACCAGCCAGCCGGAAGGGCCGAGCGCAGAAGTGGTCCTGCAACTTTATCCGCCTCCATCCAGTCTATTAATTGTTGCCGGGAAGC…		fig.3c
ISLde6 cleavage dsDNA substrate,mismatch on the 7-8 base of taget sequence	TCAGTGGAACGAAAACTCACGTTAAGGGATTTTGGTCATGAGATTATCAAAAAGGATCTTCACCTAGATCCTTTTAAATTAAAAATGAAGTTTTAAATCAATCTAAAGTATATATGAGTAAACTTGGTCTGACAGTTACCAATGCTTAATCAGTGAGGCACCTATCTCAGCGATCTGTCTATTTCGTTCATCCATAGTTGCCTGACTCCCCGTCGTGTAGATAACTACGATACGGGAGGGCTTACCATCTGGCCCCAGTGCTGCAATGATACCGCGAGACCCACGCTCACCGGCTCCAGATTTATCAGCAATAAACCAGCCAGCCGGAAGGGCCGAGCGCAGAAGTGGTCCTGCAACTTTATCCGCCTCCATCCAGTCTATTAATTGTTGCCGGGAAGC…		fig.3c
ISLde6 cleavage dsDNA substrate,mismatch on the 9-10 base of taget sequence	TCAGTGGAACGAAAACTCACGTTAAGGGATTTTGGTCATGAGATTATCAAAAAGGATCTTCACCTAGATCCTTTTAAATTAAAAATGAAGTTTTAAATCAATCTAAAGTATATATGAGTAAACTTGGTCTGACAGTTACCAATGCTTAATCAGTGAGGCACCTATCTCAGCGATCTGTCTATTTCGTTCATCCATAGTTGCCTGACTCCCCGTCGTGTAGATAACTACGATACGGGAGGGCTTACCATCTGGCCCCAGTGCTGCAATGATACCGCGAGACCCACGCTCACCGGCTCCAGATTTATCAGCAATAAACCAGCCAGCCGGAAGGGCCGAGCGCAGAAGTGGTCCTGCAACTTTATCCGCCTCCATCCAGTCTATTAATTGTTGCCGGGAAGC…		fig.3c
ISLde6 cleavage dsDNA substrate,mismatch on the 11-12 base of taget sequence	TCAGTGGAACGAAAACTCACGTTAAGGGATTTTGGTCATGAGATTATCAAAAAGGATCTTCACCTAGATCCTTTTAAATTAAAAATGAAGTTTTAAATCAATCTAAAGTATATATGAGTAAACTTGGTCTGACAGTTACCAATGCTTAATCAGTGAGGCACCTATCTCAGCGATCTGTCTATTTCGTTCATCCATAGTTGCCTGACTCCCCGTCGTGTAGATAACTACGATACGGGAGGGCTTACCATCTGGCCCCAGTGCTGCAATGATACCGCGAGACCCACGCTCACCGGCTCCAGATTTATCAGCAATAAACCAGCCAGCCGGAAGGGCCGAGCGCAGAAGTGGTCCTGCAACTTTATCCGCCTCCATCCAGTCTATTAATTGTTGCCGGGAAGC…		fig.3c
ISLde6 cleavage dsDNA substrate,mismatch on the 13-14 base of taget sequence	TCAGTGGAACGAAAACTCACGTTAAGGGATTTTGGTCATGAGATTATCAAAAAGGATCTTCACCTAGATCCTTTTAAATTAAAAATGAAGTTTTAAATCAATCTAAAGTATATATGAGTAAACTTGGTCTGACAGTTACCAATGCTTAATCAGTGAGGCACCTATCTCAGCGATCTGTCTATTTCGTTCATCCATAGTTGCCTGACTCCCCGTCGTGTAGATAACTACGATACGGGAGGGCTTACCATCTGGCCCCAGTGCTGCAATGATACCGCGAGACCCACGCTCACCGGCTCCAGATTTATCAGCAATAAACCAGCCAGCCGGAAGGGCCGAGCGCAGAAGTGGTCCTGCAACTTTATCCGCCTCCATCCAGTCTATTAATTGTTGCCGGGAAGC…		fig.3c
ISLde6 cleavage dsDNA substrate,mismatch on the 15-16 base of taget sequence	TCAGTGGAACGAAAACTCACGTTAAGGGATTTTGGTCATGAGATTATCAAAAAGGATCTTCACCTAGATCCTTTTAAATTAAAAATGAAGTTTTAAATCAATCTAAAGTATATATGAGTAAACTTGGTCTGACAGTTACCAATGCTTAATCAGTGAGGCACCTATCTCAGCGATCTGTCTATTTCGTTCATCCATAGTTGCCTGACTCCCCGTCGTGTAGATAACTACGATACGGGAGGGCTTACCATCTGGCCCCAGTGCTGCAATGATACCGCGAGACCCACGCTCACCGGCTCCAGATTTATCAGCAATAAACCAGCCAGCCGGAAGGGCCGAGCGCAGAAGTGGTCCTGCAACTTTATCCGCCTCCATCCAGTCTATTAATTGTTGCCGGGAAGC…		fig.3c
ISLde6 cleavage dsDNA substrate,mismatch on the 17-18 base of taget sequence	TCAGTGGAACGAAAACTCACGTTAAGGGATTTTGGTCATGAGATTATCAAAAAGGATCTTCACCTAGATCCTTTTAAATTAAAAATGAAGTTTTAAATCAATCTAAAGTATATATGAGTAAACTTGGTCTGACAGTTACCAATGCTTAATCAGTGAGGCACCTATCTCAGCGATCTGTCTATTTCGTTCATCCATAGTTGCCTGACTCCCCGTCGTGTAGATAACTACGATACGGGAGGGCTTACCATCTGGCCCCAGTGCTGCAATGATACCGCGAGACCCACGCTCACCGGCTCCAGATTTATCAGCAATAAACCAGCCAGCCGGAAGGGCCGAGCGCAGAAGTGGTCCTGCAACTTTATCCGCCTCCATCCAGTCTATTAATTGTTGCCGGGAAGC…		fig.3c
ISLde6 cleavage dsDNA substrate,mismatch on the 19-20 base of taget sequence	TCAGTGGAACGAAAACTCACGTTAAGGGATTTTGGTCATGAGATTATCAAAAAGGATCTTCACCTAGATCCTTTTAAATTAAAAATGAAGTTTTAAATCAATCTAAAGTATATATGAGTAAACTTGGTCTGACAGTTACCAATGCTTAATCAGTGAGGCACCTATCTCAGCGATCTGTCTATTTCGTTCATCCATAGTTGCCTGACTCCCCGTCGTGTAGATAACTACGATACGGGAGGGCTTACCATCTGGCCCCAGTGCTGCAATGATACCGCGAGACCCACGCTCACCGGCTCCAGATTTATCAGCAATAAACCAGCCAGCCGGAAGGGCCGAGCGCAGAAGTGGTCCTGCAACTTTATCCGCCTCCATCCAGTCTATTAATTGTTGCCGGGAAGC…		fig.3c
ISLam cleavage dsDNA substrate,on target	TCAGTGGAACGAAAACTCACGTTAAGGGATTTTGGTCATGAGATTATCAAAAAGGATCTTCACCTAGATCCTTTTAAATTAAAAATGAAGTTTTAAATCAATCTAAAGTATATATGAGTAAACTTGGTCTGACAGTTACCAATGCTTAATCAGTGAGGCACCTATCTCAGCGATCTGTCTATTTCGTTCATCCATAGTTGCCTGACTCCCCGTCGTGTAGATAACTACGATACGGGAGGGCTTACCATCTGGCCCCAGTGCTGCAATGATACCGCGAGACCCACGCTCACCGGCTCCAGATTTATCAGCAATAAACCAGCCAGCCGGAAGGGCCGAGCGCAGAAGTGGTCCTGCAACTTTATCCGCCTCCATCCAGTCTATTAATTGTTGCCGGGAAGC…		fig.3c, 3d
ISLam cleavage dsDNA substrate,mismatch on the 1-2 base of taget sequence	TCAGTGGAACGAAAACTCACGTTAAGGGATTTTGGTCATGAGATTATCAAAAAGGATCTTCACCTAGATCCTTTTAAATTAAAAATGAAGTTTTAAATCAATCTAAAGTATATATGAGTAAACTTGGTCTGACAGTTACCAATGCTTAATCAGTGAGGCACCTATCTCAGCGATCTGTCTATTTCGTTCATCCATAGTTGCCTGACTCCCCGTCGTGTAGATAACTACGATACGGGAGGGCTTACCATCTGGCCCCAGTGCTGCAATGATACCGCGAGACCCACGCTCACCGGCTCCAGATTTATCAGCAATAAACCAGCCAGCCGGAAGGGCCGAGCGCAGAAGTGGTCCTGCAACTTTATCCGCCTCCATCCAGTCTATTAATTGTTGCCGGGAAGC…		fig.3c
ISLam cleavage dsDNA substrate,mismatch on the 3-4 base of taget sequence	TCAGTGGAACGAAAACTCACGTTAAGGGATTTTGGTCATGAGATTATCAAAAAGGATCTTCACCTAGATCCTTTTAAATTAAAAATGAAGTTTTAAATCAATCTAAAGTATATATGAGTAAACTTGGTCTGACAGTTACCAATGCTTAATCAGTGAGGCACCTATCTCAGCGATCTGTCTATTTCGTTCATCCATAGTTGCCTGACTCCCCGTCGTGTAGATAACTACGATACGGGAGGGCTTACCATCTGGCCCCAGTGCTGCAATGATACCGCGAGACCCACGCTCACCGGCTCCAGATTTATCAGCAATAAACCAGCCAGCCGGAAGGGCCGAGCGCAGAAGTGGTCCTGCAACTTTATCCGCCTCCATCCAGTCTATTAATTGTTGCCGGGAAGC…		fig.3c
ISLam cleavage dsDNA substrate,mismatch on the 5-6 base of taget sequence	TCAGTGGAACGAAAACTCACGTTAAGGGATTTTGGTCATGAGATTATCAAAAAGGATCTTCACCTAGATCCTTTTAAATTAAAAATGAAGTTTTAAATCAATCTAAAGTATATATGAGTAAACTTGGTCTGACAGTTACCAATGCTTAATCAGTGAGGCACCTATCTCAGCGATCTGTCTATTTCGTTCATCCATAGTTGCCTGACTCCCCGTCGTGTAGATAACTACGATACGGGAGGGCTTACCATCTGGCCCCAGTGCTGCAATGATACCGCGAGACCCACGCTCACCGGCTCCAGATTTATCAGCAATAAACCAGCCAGCCGGAAGGGCCGAGCGCAGAAGTGGTCCTGCAACTTTATCCGCCTCCATCCAGTCTATTAATTGTTGCCGGGAAGC…		fig.3c
ISLam cleavage dsDNA substrate,mismatch on the 7-8 base of taget sequence	TCAGTGGAACGAAAACTCACGTTAAGGGATTTTGGTCATGAGATTATCAAAAAGGATCTTCACCTAGATCCTTTTAAATTAAAAATGAAGTTTTAAATCAATCTAAAGTATATATGAGTAAACTTGGTCTGACAGTTACCAATGCTTAATCAGTGAGGCACCTATCTCAGCGATCTGTCTATTTCGTTCATCCATAGTTGCCTGACTCCCCGTCGTGTAGATAACTACGATACGGGAGGGCTTACCATCTGGCCCCAGTGCTGCAATGATACCGCGAGACCCACGCTCACCGGCTCCAGATTTATCAGCAATAAACCAGCCAGCCGGAAGGGCCGAGCGCAGAAGTGGTCCTGCAACTTTATCCGCCTCCATCCAGTCTATTAATTGTTGCCGGGAAGC…		fig.3c
ISLam cleavage dsDNA substrate,mismatch on the 9-10 base of taget sequence	TCAGTGGAACGAAAACTCACGTTAAGGGATTTTGGTCATGAGATTATCAAAAAGGATCTTCACCTAGATCCTTTTAAATTAAAAATGAAGTTTTAAATCAATCTAAAGTATATATGAGTAAACTTGGTCTGACAGTTACCAATGCTTAATCAGTGAGGCACCTATCTCAGCGATCTGTCTATTTCGTTCATCCATAGTTGCCTGACTCCCCGTCGTGTAGATAACTACGATACGGGAGGGCTTACCATCTGGCCCCAGTGCTGCAATGATACCGCGAGACCCACGCTCACCGGCTCCAGATTTATCAGCAATAAACCAGCCAGCCGGAAGGGCCGAGCGCAGAAGTGGTCCTGCAACTTTATCCGCCTCCATCCAGTCTATTAATTGTTGCCGGGAAGC…		fig.3c
ISLam cleavage dsDNA substrate,mismatch on the 11-12 base of taget sequence	TCAGTGGAACGAAAACTCACGTTAAGGGATTTTGGTCATGAGATTATCAAAAAGGATCTTCACCTAGATCCTTTTAAATTAAAAATGAAGTTTTAAATCAATCTAAAGTATATATGAGTAAACTTGGTCTGACAGTTACCAATGCTTAATCAGTGAGGCACCTATCTCAGCGATCTGTCTATTTCGTTCATCCATAGTTGCCTGACTCCCCGTCGTGTAGATAACTACGATACGGGAGGGCTTACCATCTGGCCCCAGTGCTGCAATGATACCGCGAGACCCACGCTCACCGGCTCCAGATTTATCAGCAATAAACCAGCCAGCCGGAAGGGCCGAGCGCAGAAGTGGTCCTGCAACTTTATCCGCCTCCATCCAGTCTATTAATTGTTGCCGGGAAGC…		fig.3c
ISLam cleavage dsDNA substrate,mismatch on the 13-14 base of taget sequence	TCAGTGGAACGAAAACTCACGTTAAGGGATTTTGGTCATGAGATTATCAAAAAGGATCTTCACCTAGATCCTTTTAAATTAAAAATGAAGTTTTAAATCAATCTAAAGTATATATGAGTAAACTTGGTCTGACAGTTACCAATGCTTAATCAGTGAGGCACCTATCTCAGCGATCTGTCTATTTCGTTCATCCATAGTTGCCTGACTCCCCGTCGTGTAGATAACTACGATACGGGAGGGCTTACCATCTGGCCCCAGTGCTGCAATGATACCGCGAGACCCACGCTCACCGGCTCCAGATTTATCAGCAATAAACCAGCCAGCCGGAAGGGCCGAGCGCAGAAGTGGTCCTGCAACTTTATCCGCCTCCATCCAGTCTATTAATTGTTGCCGGGAAGC…		fig.3c
ISLam cleavage dsDNA substrate,mismatch on the 15-16 base of taget sequence	TCAGTGGAACGAAAACTCACGTTAAGGGATTTTGGTCATGAGATTATCAAAAAGGATCTTCACCTAGATCCTTTTAAATTAAAAATGAAGTTTTAAATCAATCTAAAGTATATATGAGTAAACTTGGTCTGACAGTTACCAATGCTTAATCAGTGAGGCACCTATCTCAGCGATCTGTCTATTTCGTTCATCCATAGTTGCCTGACTCCCCGTCGTGTAGATAACTACGATACGGGAGGGCTTACCATCTGGCCCCAGTGCTGCAATGATACCGCGAGACCCACGCTCACCGGCTCCAGATTTATCAGCAATAAACCAGCCAGCCGGAAGGGCCGAGCGCAGAAGTGGTCCTGCAACTTTATCCGCCTCCATCCAGTCTATTAATTGTTGCCGGGAAGC…		fig.3c
ISLam cleavage dsDNA substrate,mismatch on the 17-18 base of taget sequence	TCAGTGGAACGAAAACTCACGTTAAGGGATTTTGGTCATGAGATTATCAAAAAGGATCTTCACCTAGATCCTTTTAAATTAAAAATGAAGTTTTAAATCAATCTAAAGTATATATGAGTAAACTTGGTCTGACAGTTACCAATGCTTAATCAGTGAGGCACCTATCTCAGCGATCTGTCTATTTCGTTCATCCATAGTTGCCTGACTCCCCGTCGTGTAGATAACTACGATACGGGAGGGCTTACCATCTGGCCCCAGTGCTGCAATGATACCGCGAGACCCACGCTCACCGGCTCCAGATTTATCAGCAATAAACCAGCCAGCCGGAAGGGCCGAGCGCAGAAGTGGTCCTGCAACTTTATCCGCCTCCATCCAGTCTATTAATTGTTGCCGGGAAGC…		fig.3c
ISLam cleavage dsDNA substrate,mismatch on the 19-20 base of taget sequence	TCAGTGGAACGAAAACTCACGTTAAGGGATTTTGGTCATGAGATTATCAAAAAGGATCTTCACCTAGATCCTTTTAAATTAAAAATGAAGTTTTAAATCAATCTAAAGTATATATGAGTAAACTTGGTCTGACAGTTACCAATGCTTAATCAGTGAGGCACCTATCTCAGCGATCTGTCTATTTCGTTCATCCATAGTTGCCTGACTCCCCGTCGTGTAGATAACTACGATACGGGAGGGCTTACCATCTGGCCCCAGTGCTGCAATGATACCGCGAGACCCACGCTCACCGGCTCCAGATTTATCAGCAATAAACCAGCCAGCCGGAAGGGCCGAGCGCAGAAGTGGTCCTGCAACTTTATCCGCCTCCATCCAGTCTATTAATTGTTGCCGGGAAGC…		fig.3c
Cleavage substrates with different TAM (5'-TTGAT or 5'-TTTAA TAM with saturation mutations )	sequence (5'→3')
ISLde6 cleavage dsDNA substrate, ctrl group(no target)	TCAGTGGAACGAAAACTCACGTTAAGGGATTTTGGTCATGAGATTATCAAAAAGGATCTTCACCTAGATCCTTTTAAATTAAAAATGAAGTTTTAAATCAATCTAAAGTATATATGAGTAAACTTGGTCTGACAGTTACCAATGCTTAATCAGTGAGGCACCTATCTCAGCGATCTGTCTATTTCGcTCgTCCATAGTTGCCTGACTCCCCGTCGTGTAGATAACTACGATACGGGAGGGCTTACCATCTGGCCCCAGTGCTGCAATGATACCGCGAGACCCACGCTCACCGGCTCCAGATTTATCAGCAATAAACCAGCCAGCCGGAAGGGCCGAGCGCAGAAGTGGTCCTGCAACTTTATCCGCCTCCATCCAGTCTATTAATTGTTGCCGGGAAGC…		fig.3f
ISLde6 cleavage dsDNA substrate, TTGAT TAM	TCAGTGGAACGAAAACTCACGTTAAGGGATTTTGGTCATGAGATTATCAAAAAGGATCTTCACCTAGATCCTTTTAAATTAAAAATGAAGTTTTAAATCAATCTAAAGTATATATGAGTAAACTTGGTCTGACAGTTACCAATGCTTAATCAGTGAGGCACCTATCTCAGCGATCTGTCTATTTCGTTCATCCATAGTTGCCTGACTCCCCGTCGTGTAGATAACTACGATACGGGAGGGCTTACCATCTGGCCCCAGTGCTGCAATGATACCGCGAGACCCACGCTCACCGGCTCCAGATTTATCAGCAATAAACCAGCCAGCCGGAAGGGCCGAGCGCAGAAGTGGTCCTGCAACTTTATCCGCCTCCATCCAGTCTATTAATTGTTGCCGGGAAGC…		fig.3f
ISLde6 cleavage dsDNA substrate, ATGAT TAM	TCAGTGGAACGAAAACTCACGTTAAGGGATTTTGGTCATGAGATTATCAAAAAGGATCTTCACCTAGATCCTTTTAAATTAAAAATGAAGTTTTAAATCAATCTAAAGTATATATGAGTAAACTTGGTCTGACAGTTACCAATGCTTAATCAGTGAGGCACCTATCTCAGCGATCTGTCTATTTCGTTCATCCATAGTTGCCTGACTCCCCGTCGTGTAGATAACTACGATACGGGAGGGCTTACCATCTGGCCCCAGTGCTGCAATGATACCGCGAGACCCACGCTCACCGGCTCCAGATTTATCAGCAATAAACCAGCCAGCCGGAAGGGCCGAGCGCAGAAGTGGTCCTGCAACTTTATCCGCCTCCATCCAGTCTATTAATTGTTGCCGGGAAGC…		fig.3f
ISLde6 cleavage dsDNA substrate, CTGAT TAM	TCAGTGGAACGAAAACTCACGTTAAGGGATTTTGGTCATGAGATTATCAAAAAGGATCTTCACCTAGATCCTTTTAAATTAAAAATGAAGTTTTAAATCAATCTAAAGTATATATGAGTAAACTTGGTCTGACAGTTACCAATGCTTAATCAGTGAGGCACCTATCTCAGCGATCTGTCTATTTCGTTCATCCATAGTTGCCTGACTCCCCGTCGTGTAGATAACTACGATACGGGAGGGCTTACCATCTGGCCCCAGTGCTGCAATGATACCGCGAGACCCACGCTCACCGGCTCCAGATTTATCAGCAATAAACCAGCCAGCCGGAAGGGCCGAGCGCAGAAGTGGTCCTGCAACTTTATCCGCCTCCATCCAGTCTATTAATTGTTGCCGGGAAGC…		fig.3f
ISLde6 cleavage dsDNA substrate, GTGAT TAM	TCAGTGGAACGAAAACTCACGTTAAGGGATTTTGGTCATGAGATTATCAAAAAGGATCTTCACCTAGATCCTTTTAAATTAAAAATGAAGTTTTAAATCAATCTAAAGTATATATGAGTAAACTTGGTCTGACAGTTACCAATGCTTAATCAGTGAGGCACCTATCTCAGCGATCTGTCTATTTCGTTCATCCATAGTTGCCTGACTCCCCGTCGTGTAGATAACTACGATACGGGAGGGCTTACCATCTGGCCCCAGTGCTGCAATGATACCGCGAGACCCACGCTCACCGGCTCCAGATTTATCAGCAATAAACCAGCCAGCCGGAAGGGCCGAGCGCAGAAGTGGTCCTGCAACTTTATCCGCCTCCATCCAGTCTATTAATTGTTGCCGGGAAGC…		fig.3f
ISLde6 cleavage dsDNA substrate, TAGAT TAM	TCAGTGGAACGAAAACTCACGTTAAGGGATTTTGGTCATGAGATTATCAAAAAGGATCTTCACCTAGATCCTTTTAAATTAAAAATGAAGTTTTAAATCAATCTAAAGTATATATGAGTAAACTTGGTCTGACAGTTACCAATGCTTAATCAGTGAGGCACCTATCTCAGCGATCTGTCTATTTCGTTCATCCATAGTTGCCTGACTCCCCGTCGTGTAGATAACTACGATACGGGAGGGCTTACCATCTGGCCCCAGTGCTGCAATGATACCGCGAGACCCACGCTCACCGGCTCCAGATTTATCAGCAATAAACCAGCCAGCCGGAAGGGCCGAGCGCAGAAGTGGTCCTGCAACTTTATCCGCCTCCATCCAGTCTATTAATTGTTGCCGGGAAGC…		fig.3f
ISLde6 cleavage dsDNA substrate, TCGAT TAM	TCAGTGGAACGAAAACTCACGTTAAGGGATTTTGGTCATGAGATTATCAAAAAGGATCTTCACCTAGATCCTTTTAAATTAAAAATGAAGTTTTAAATCAATCTAAAGTATATATGAGTAAACTTGGTCTGACAGTTACCAATGCTTAATCAGTGAGGCACCTATCTCAGCGATCTGTCTATTTCGTTCATCCATAGTTGCCTGACTCCCCGTCGTGTAGATAACTACGATACGGGAGGGCTTACCATCTGGCCCCAGTGCTGCAATGATACCGCGAGACCCACGCTCACCGGCTCCAGATTTATCAGCAATAAACCAGCCAGCCGGAAGGGCCGAGCGCAGAAGTGGTCCTGCAACTTTATCCGCCTCCATCCAGTCTATTAATTGTTGCCGGGAAGC…		fig.3f
ISLde6 cleavage dsDNA substrate, TGGAT TAM	TCAGTGGAACGAAAACTCACGTTAAGGGATTTTGGTCATGAGATTATCAAAAAGGATCTTCACCTAGATCCTTTTAAATTAAAAATGAAGTTTTAAATCAATCTAAAGTATATATGAGTAAACTTGGTCTGACAGTTACCAATGCTTAATCAGTGAGGCACCTATCTCAGCGATCTGTCTATTTCGTTCATCCATAGTTGCCTGACTCCCCGTCGTGTAGATAACTACGATACGGGAGGGCTTACCATCTGGCCCCAGTGCTGCAATGATACCGCGAGACCCACGCTCACCGGCTCCAGATTTATCAGCAATAAACCAGCCAGCCGGAAGGGCCGAGCGCAGAAGTGGTCCTGCAACTTTATCCGCCTCCATCCAGTCTATTAATTGTTGCCGGGAAGC…		fig.3f
ISLde6 cleavage dsDNA substrate, TTAAT TAM	TCAGTGGAACGAAAACTCACGTTAAGGGATTTTGGTCATGAGATTATCAAAAAGGATCTTCACCTAGATCCTTTTAAATTAAAAATGAAGTTTTAAATCAATCTAAAGTATATATGAGTAAACTTGGTCTGACAGTTACCAATGCTTAATCAGTGAGGCACCTATCTCAGCGATCTGTCTATTTCGTTCATCCATAGTTGCCTGACTCCCCGTCGTGTAGATAACTACGATACGGGAGGGCTTACCATCTGGCCCCAGTGCTGCAATGATACCGCGAGACCCACGCTCACCGGCTCCAGATTTATCAGCAATAAACCAGCCAGCCGGAAGGGCCGAGCGCAGAAGTGGTCCTGCAACTTTATCCGCCTCCATCCAGTCTATTAATTGTTGCCGGGAAGC…		fig.3f
ISLde6 cleavage dsDNA substrate, TTTAT TAM	TCAGTGGAACGAAAACTCACGTTAAGGGATTTTGGTCATGAGATTATCAAAAAGGATCTTCACCTAGATCCTTTTAAATTAAAAATGAAGTTTTAAATCAATCTAAAGTATATATGAGTAAACTTGGTCTGACAGTTACCAATGCTTAATCAGTGAGGCACCTATCTCAGCGATCTGTCTATTTCGTTCATCCATAGTTGCCTGACTCCCCGTCGTGTAGATAACTACGATACGGGAGGGCTTACCATCTGGCCCCAGTGCTGCAATGATACCGCGAGACCCACGCTCACCGGCTCCAGATTTATCAGCAATAAACCAGCCAGCCGGAAGGGCCGAGCGCAGAAGTGGTCCTGCAACTTTATCCGCCTCCATCCAGTCTATTAATTGTTGCCGGGAAGC…		fig.3f
ISLde6 cleavage dsDNA substrate, TTCAT TAM	TCAGTGGAACGAAAACTCACGTTAAGGGATTTTGGTCATGAGATTATCAAAAAGGATCTTCACCTAGATCCTTTTAAATTAAAAATGAAGTTTTAAATCAATCTAAAGTATATATGAGTAAACTTGGTCTGACAGTTACCAATGCTTAATCAGTGAGGCACCTATCTCAGCGATCTGTCTATTTCGTTCATCCATAGTTGCCTGACTCCCCGTCGTGTAGATAACTACGATACGGGAGGGCTTACCATCTGGCCCCAGTGCTGCAATGATACCGCGAGACCCACGCTCACCGGCTCCAGATTTATCAGCAATAAACCAGCCAGCCGGAAGGGCCGAGCGCAGAAGTGGTCCTGCAACTTTATCCGCCTCCATCCAGTCTATTAATTGTTGCCGGGAAGC…		fig.3f
ISLde6 cleavage dsDNA substrate, TTGTT TAM	TCAGTGGAACGAAAACTCACGTTAAGGGATTTTGGTCATGAGATTATCAAAAAGGATCTTCACCTAGATCCTTTTAAATTAAAAATGAAGTTTTAAATCAATCTAAAGTATATATGAGTAAACTTGGTCTGACAGTTACCAATGCTTAATCAGTGAGGCACCTATCTCAGCGATCTGTCTATTTCGTTCATCCATAGTTGCCTGACTCCCCGTCGTGTAGATAACTACGATACGGGAGGGCTTACCATCTGGCCCCAGTGCTGCAATGATACCGCGAGACCCACGCTCACCGGCTCCAGATTTATCAGCAATAAACCAGCCAGCCGGAAGGGCCGAGCGCAGAAGTGGTCCTGCAACTTTATCCGCCTCCATCCAGTCTATTAATTGTTGCCGGGAAGC…		fig.3f
ISLde6 cleavage dsDNA substrate, TTGCT TAM	TCAGTGGAACGAAAACTCACGTTAAGGGATTTTGGTCATGAGATTATCAAAAAGGATCTTCACCTAGATCCTTTTAAATTAAAAATGAAGTTTTAAATCAATCTAAAGTATATATGAGTAAACTTGGTCTGACAGTTACCAATGCTTAATCAGTGAGGCACCTATCTCAGCGATCTGTCTATTTCGTTCATCCATAGTTGCCTGACTCCCCGTCGTGTAGATAACTACGATACGGGAGGGCTTACCATCTGGCCCCAGTGCTGCAATGATACCGCGAGACCCACGCTCACCGGCTCCAGATTTATCAGCAATAAACCAGCCAGCCGGAAGGGCCGAGCGCAGAAGTGGTCCTGCAACTTTATCCGCCTCCATCCAGTCTATTAATTGTTGCCGGGAAGC…		fig.3f
ISLde6 cleavage dsDNA substrate, TTGGT TAM	TCAGTGGAACGAAAACTCACGTTAAGGGATTTTGGTCATGAGATTATCAAAAAGGATCTTCACCTAGATCCTTTTAAATTAAAAATGAAGTTTTAAATCAATCTAAAGTATATATGAGTAAACTTGGTCTGACAGTTACCAATGCTTAATCAGTGAGGCACCTATCTCAGCGATCTGTCTATTTCGTTCATCCATAGTTGCCTGACTCCCCGTCGTGTAGATAACTACGATACGGGAGGGCTTACCATCTGGCCCCAGTGCTGCAATGATACCGCGAGACCCACGCTCACCGGCTCCAGATTTATCAGCAATAAACCAGCCAGCCGGAAGGGCCGAGCGCAGAAGTGGTCCTGCAACTTTATCCGCCTCCATCCAGTCTATTAATTGTTGCCGGGAAGC…		fig.3f
ISLde6 cleavage dsDNA substrate, TTGAA TAM	TCAGTGGAACGAAAACTCACGTTAAGGGATTTTGGTCATGAGATTATCAAAAAGGATCTTCACCTAGATCCTTTTAAATTAAAAATGAAGTTTTAAATCAATCTAAAGTATATATGAGTAAACTTGGTCTGACAGTTACCAATGCTTAATCAGTGAGGCACCTATCTCAGCGATCTGTCTATTTCGTTCATCCATAGTTGCCTGACTCCCCGTCGTGTAGATAACTACGATACGGGAGGGCTTACCATCTGGCCCCAGTGCTGCAATGATACCGCGAGACCCACGCTCACCGGCTCCAGATTTATCAGCAATAAACCAGCCAGCCGGAAGGGCCGAGCGCAGAAGTGGTCCTGCAACTTTATCCGCCTCCATCCAGTCTATTAATTGTTGCCGGGAAGC…		fig.3f
ISLde6 cleavage dsDNA substrate, TTGAC TAM	TCAGTGGAACGAAAACTCACGTTAAGGGATTTTGGTCATGAGATTATCAAAAAGGATCTTCACCTAGATCCTTTTAAATTAAAAATGAAGTTTTAAATCAATCTAAAGTATATATGAGTAAACTTGGTCTGACAGTTACCAATGCTTAATCAGTGAGGCACCTATCTCAGCGATCTGTCTATTTCGTTCATCCATAGTTGCCTGACTCCCCGTCGTGTAGATAACTACGATACGGGAGGGCTTACCATCTGGCCCCAGTGCTGCAATGATACCGCGAGACCCACGCTCACCGGCTCCAGATTTATCAGCAATAAACCAGCCAGCCGGAAGGGCCGAGCGCAGAAGTGGTCCTGCAACTTTATCCGCCTCCATCCAGTCTATTAATTGTTGCCGGGAAGC…		fig.3f
ISLde6 cleavage dsDNA substrate, TTGAG TAM	TCAGTGGAACGAAAACTCACGTTAAGGGATTTTGGTCATGAGATTATCAAAAAGGATCTTCACCTAGATCCTTTTAAATTAAAAATGAAGTTTTAAATCAATCTAAAGTATATATGAGTAAACTTGGTCTGACAGTTACCAATGCTTAATCAGTGAGGCACCTATCTCAGCGATCTGTCTATTTCGTTCATCCATAGTTGCCTGACTCCCCGTCGTGTAGATAACTACGATACGGGAGGGCTTACCATCTGGCCCCAGTGCTGCAATGATACCGCGAGACCCACGCTCACCGGCTCCAGATTTATCAGCAATAAACCAGCCAGCCGGAAGGGCCGAGCGCAGAAGTGGTCCTGCAACTTTATCCGCCTCCATCCAGTCTATTAATTGTTGCCGGGAAGC…		fig.3f
ISLam cleavage dsDNA substrate, ctrl group(no target)	TCAGTGGAACGAAAACTCACGTTAAGGGATTTTGGTCATGAGATTATCAAAAAGGATCTTCACCTAGATCCTTTTAAATTAAAAATGAAGTTTTAAATCAATCTAAAGTATATATGAGTAAACTTGGTCTGACAGTTACCAATGCTTAATCAGTGAGGCACCTATCTCAGCGATCTGTCTATTTCGcTCgTCCATAGTTGCCTGACTCCCCGTCGTGTAGATAACTACGATACGGGAGGGCTTACCATCTGGCCCCAGTGCTGCAATGATACCGCGAGACCCACGCTCACCGGCTCCAGATTTATCAGCAATAAACCAGCCAGCCGGAAGGGCCGAGCGCAGAAGTGGTCCTGCAACTTTATCCGCCTCCATCCAGTCTATTAATTGTTGCCGGGAAGC…		fig.3f
ISLam cleavage dsDNA substrate, TTTAA TAM	TCAGTGGAACGAAAACTCACGTTAAGGGATTTTGGTCATGAGATTATCAAAAAGGATCTTCACCTAGATCCTTTTAAATTAAAAATGAAGTTTTAAATCAATCTAAAGTATATATGAGTAAACTTGGTCTGACAGTTACCAATGCTTAATCAGTGAGGCACCTATCTCAGCGATCTGTCTATTTCGTTCATCCATAGTTGCCTGACTCCCCGTCGTGTAGATAACTACGATACGGGAGGGCTTACCATCTGGCCCCAGTGCTGCAATGATACCGCGAGACCCACGCTCACCGGCTCCAGATTTATCAGCAATAAACCAGCCAGCCGGAAGGGCCGAGCGCAGAAGTGGTCCTGCAACTTTATCCGCCTCCATCCAGTCTATTAATTGTTGCCGGGAAGC…		fig.3f
ISLam cleavage dsDNA substrate, ATTAA TAM	TCAGTGGAACGAAAACTCACGTTAAGGGATTTTGGTCATGAGATTATCAAAAAGGATCTTCACCTAGATCCTTTTAAATTAAAAATGAAGTTTTAAATCAATCTAAAGTATATATGAGTAAACTTGGTCTGACAGTTACCAATGCTTAATCAGTGAGGCACCTATCTCAGCGATCTGTCTATTTCGTTCATCCATAGTTGCCTGACTCCCCGTCGTGTAGATAACTACGATACGGGAGGGCTTACCATCTGGCCCCAGTGCTGCAATGATACCGCGAGACCCACGCTCACCGGCTCCAGATTTATCAGCAATAAACCAGCCAGCCGGAAGGGCCGAGCGCAGAAGTGGTCCTGCAACTTTATCCGCCTCCATCCAGTCTATTAATTGTTGCCGGGAAGC…		fig.3f
ISLam cleavage dsDNA substrate, CTTAA TAM	TCAGTGGAACGAAAACTCACGTTAAGGGATTTTGGTCATGAGATTATCAAAAAGGATCTTCACCTAGATCCTTTTAAATTAAAAATGAAGTTTTAAATCAATCTAAAGTATATATGAGTAAACTTGGTCTGACAGTTACCAATGCTTAATCAGTGAGGCACCTATCTCAGCGATCTGTCTATTTCGTTCATCCATAGTTGCCTGACTCCCCGTCGTGTAGATAACTACGATACGGGAGGGCTTACCATCTGGCCCCAGTGCTGCAATGATACCGCGAGACCCACGCTCACCGGCTCCAGATTTATCAGCAATAAACCAGCCAGCCGGAAGGGCCGAGCGCAGAAGTGGTCCTGCAACTTTATCCGCCTCCATCCAGTCTATTAATTGTTGCCGGGAAGC…		fig.3f
ISLam cleavage dsDNA substrate, GTTAA TAM	TCAGTGGAACGAAAACTCACGTTAAGGGATTTTGGTCATGAGATTATCAAAAAGGATCTTCACCTAGATCCTTTTAAATTAAAAATGAAGTTTTAAATCAATCTAAAGTATATATGAGTAAACTTGGTCTGACAGTTACCAATGCTTAATCAGTGAGGCACCTATCTCAGCGATCTGTCTATTTCGTTCATCCATAGTTGCCTGACTCCCCGTCGTGTAGATAACTACGATACGGGAGGGCTTACCATCTGGCCCCAGTGCTGCAATGATACCGCGAGACCCACGCTCACCGGCTCCAGATTTATCAGCAATAAACCAGCCAGCCGGAAGGGCCGAGCGCAGAAGTGGTCCTGCAACTTTATCCGCCTCCATCCAGTCTATTAATTGTTGCCGGGAAGC…		fig.3f
ISLam cleavage dsDNA substrate, TATAA TAM	TCAGTGGAACGAAAACTCACGTTAAGGGATTTTGGTCATGAGATTATCAAAAAGGATCTTCACCTAGATCCTTTTAAATTAAAAATGAAGTTTTAAATCAATCTAAAGTATATATGAGTAAACTTGGTCTGACAGTTACCAATGCTTAATCAGTGAGGCACCTATCTCAGCGATCTGTCTATTTCGTTCATCCATAGTTGCCTGACTCCCCGTCGTGTAGATAACTACGATACGGGAGGGCTTACCATCTGGCCCCAGTGCTGCAATGATACCGCGAGACCCACGCTCACCGGCTCCAGATTTATCAGCAATAAACCAGCCAGCCGGAAGGGCCGAGCGCAGAAGTGGTCCTGCAACTTTATCCGCCTCCATCCAGTCTATTAATTGTTGCCGGGAAGC…		fig.3f
ISLam cleavage dsDNA substrate, TCTAA TAM	TCAGTGGAACGAAAACTCACGTTAAGGGATTTTGGTCATGAGATTATCAAAAAGGATCTTCACCTAGATCCTTTTAAATTAAAAATGAAGTTTTAAATCAATCTAAAGTATATATGAGTAAACTTGGTCTGACAGTTACCAATGCTTAATCAGTGAGGCACCTATCTCAGCGATCTGTCTATTTCGTTCATCCATAGTTGCCTGACTCCCCGTCGTGTAGATAACTACGATACGGGAGGGCTTACCATCTGGCCCCAGTGCTGCAATGATACCGCGAGACCCACGCTCACCGGCTCCAGATTTATCAGCAATAAACCAGCCAGCCGGAAGGGCCGAGCGCAGAAGTGGTCCTGCAACTTTATCCGCCTCCATCCAGTCTATTAATTGTTGCCGGGAAGC…		fig.3f
ISLam cleavage dsDNA substrate, TGTAA TAM	TCAGTGGAACGAAAACTCACGTTAAGGGATTTTGGTCATGAGATTATCAAAAAGGATCTTCACCTAGATCCTTTTAAATTAAAAATGAAGTTTTAAATCAATCTAAAGTATATATGAGTAAACTTGGTCTGACAGTTACCAATGCTTAATCAGTGAGGCACCTATCTCAGCGATCTGTCTATTTCGTTCATCCATAGTTGCCTGACTCCCCGTCGTGTAGATAACTACGATACGGGAGGGCTTACCATCTGGCCCCAGTGCTGCAATGATACCGCGAGACCCACGCTCACCGGCTCCAGATTTATCAGCAATAAACCAGCCAGCCGGAAGGGCCGAGCGCAGAAGTGGTCCTGCAACTTTATCCGCCTCCATCCAGTCTATTAATTGTTGCCGGGAAGC…		fig.3f
ISLam cleavage dsDNA substrate, TTAAA TAM	TCAGTGGAACGAAAACTCACGTTAAGGGATTTTGGTCATGAGATTATCAAAAAGGATCTTCACCTAGATCCTTTTAAATTAAAAATGAAGTTTTAAATCAATCTAAAGTATATATGAGTAAACTTGGTCTGACAGTTACCAATGCTTAATCAGTGAGGCACCTATCTCAGCGATCTGTCTATTTCGTTCATCCATAGTTGCCTGACTCCCCGTCGTGTAGATAACTACGATACGGGAGGGCTTACCATCTGGCCCCAGTGCTGCAATGATACCGCGAGACCCACGCTCACCGGCTCCAGATTTATCAGCAATAAACCAGCCAGCCGGAAGGGCCGAGCGCAGAAGTGGTCCTGCAACTTTATCCGCCTCCATCCAGTCTATTAATTGTTGCCGGGAAGC…		fig.3f
ISLam cleavage dsDNA substrate, TTCAA TAM	TCAGTGGAACGAAAACTCACGTTAAGGGATTTTGGTCATGAGATTATCAAAAAGGATCTTCACCTAGATCCTTTTAAATTAAAAATGAAGTTTTAAATCAATCTAAAGTATATATGAGTAAACTTGGTCTGACAGTTACCAATGCTTAATCAGTGAGGCACCTATCTCAGCGATCTGTCTATTTCGTTCATCCATAGTTGCCTGACTCCCCGTCGTGTAGATAACTACGATACGGGAGGGCTTACCATCTGGCCCCAGTGCTGCAATGATACCGCGAGACCCACGCTCACCGGCTCCAGATTTATCAGCAATAAACCAGCCAGCCGGAAGGGCCGAGCGCAGAAGTGGTCCTGCAACTTTATCCGCCTCCATCCAGTCTATTAATTGTTGCCGGGAAGC…		fig.3f
ISLam cleavage dsDNA substrate, TTGAA TAM	TCAGTGGAACGAAAACTCACGTTAAGGGATTTTGGTCATGAGATTATCAAAAAGGATCTTCACCTAGATCCTTTTAAATTAAAAATGAAGTTTTAAATCAATCTAAAGTATATATGAGTAAACTTGGTCTGACAGTTACCAATGCTTAATCAGTGAGGCACCTATCTCAGCGATCTGTCTATTTCGTTCATCCATAGTTGCCTGACTCCCCGTCGTGTAGATAACTACGATACGGGAGGGCTTACCATCTGGCCCCAGTGCTGCAATGATACCGCGAGACCCACGCTCACCGGCTCCAGATTTATCAGCAATAAACCAGCCAGCCGGAAGGGCCGAGCGCAGAAGTGGTCCTGCAACTTTATCCGCCTCCATCCAGTCTATTAATTGTTGCCGGGAAGC…		fig.3f
ISLam cleavage dsDNA substrate, TTTTA TAM	TCAGTGGAACGAAAACTCACGTTAAGGGATTTTGGTCATGAGATTATCAAAAAGGATCTTCACCTAGATCCTTTTAAATTAAAAATGAAGTTTTAAATCAATCTAAAGTATATATGAGTAAACTTGGTCTGACAGTTACCAATGCTTAATCAGTGAGGCACCTATCTCAGCGATCTGTCTATTTCGTTCATCCATAGTTGCCTGACTCCCCGTCGTGTAGATAACTACGATACGGGAGGGCTTACCATCTGGCCCCAGTGCTGCAATGATACCGCGAGACCCACGCTCACCGGCTCCAGATTTATCAGCAATAAACCAGCCAGCCGGAAGGGCCGAGCGCAGAAGTGGTCCTGCAACTTTATCCGCCTCCATCCAGTCTATTAATTGTTGCCGGGAAGC…		fig.3f
ISLam cleavage dsDNA substrate, TTTCA TAM	TCAGTGGAACGAAAACTCACGTTAAGGGATTTTGGTCATGAGATTATCAAAAAGGATCTTCACCTAGATCCTTTTAAATTAAAAATGAAGTTTTAAATCAATCTAAAGTATATATGAGTAAACTTGGTCTGACAGTTACCAATGCTTAATCAGTGAGGCACCTATCTCAGCGATCTGTCTATTTCGTTCATCCATAGTTGCCTGACTCCCCGTCGTGTAGATAACTACGATACGGGAGGGCTTACCATCTGGCCCCAGTGCTGCAATGATACCGCGAGACCCACGCTCACCGGCTCCAGATTTATCAGCAATAAACCAGCCAGCCGGAAGGGCCGAGCGCAGAAGTGGTCCTGCAACTTTATCCGCCTCCATCCAGTCTATTAATTGTTGCCGGGAAGC…		fig.3f
ISLam cleavage dsDNA substrate, TTTGA TAM	TCAGTGGAACGAAAACTCACGTTAAGGGATTTTGGTCATGAGATTATCAAAAAGGATCTTCACCTAGATCCTTTTAAATTAAAAATGAAGTTTTAAATCAATCTAAAGTATATATGAGTAAACTTGGTCTGACAGTTACCAATGCTTAATCAGTGAGGCACCTATCTCAGCGATCTGTCTATTTCGTTCATCCATAGTTGCCTGACTCCCCGTCGTGTAGATAACTACGATACGGGAGGGCTTACCATCTGGCCCCAGTGCTGCAATGATACCGCGAGACCCACGCTCACCGGCTCCAGATTTATCAGCAATAAACCAGCCAGCCGGAAGGGCCGAGCGCAGAAGTGGTCCTGCAACTTTATCCGCCTCCATCCAGTCTATTAATTGTTGCCGGGAAGC…		fig.3f
ISLam cleavage dsDNA substrate, TTTAT TAM	TCAGTGGAACGAAAACTCACGTTAAGGGATTTTGGTCATGAGATTATCAAAAAGGATCTTCACCTAGATCCTTTTAAATTAAAAATGAAGTTTTAAATCAATCTAAAGTATATATGAGTAAACTTGGTCTGACAGTTACCAATGCTTAATCAGTGAGGCACCTATCTCAGCGATCTGTCTATTTCGTTCATCCATAGTTGCCTGACTCCCCGTCGTGTAGATAACTACGATACGGGAGGGCTTACCATCTGGCCCCAGTGCTGCAATGATACCGCGAGACCCACGCTCACCGGCTCCAGATTTATCAGCAATAAACCAGCCAGCCGGAAGGGCCGAGCGCAGAAGTGGTCCTGCAACTTTATCCGCCTCCATCCAGTCTATTAATTGTTGCCGGGAAGC…		fig.3f
ISLam cleavage dsDNA substrate, TTTAC TAM	TCAGTGGAACGAAAACTCACGTTAAGGGATTTTGGTCATGAGATTATCAAAAAGGATCTTCACCTAGATCCTTTTAAATTAAAAATGAAGTTTTAAATCAATCTAAAGTATATATGAGTAAACTTGGTCTGACAGTTACCAATGCTTAATCAGTGAGGCACCTATCTCAGCGATCTGTCTATTTCGTTCATCCATAGTTGCCTGACTCCCCGTCGTGTAGATAACTACGATACGGGAGGGCTTACCATCTGGCCCCAGTGCTGCAATGATACCGCGAGACCCACGCTCACCGGCTCCAGATTTATCAGCAATAAACCAGCCAGCCGGAAGGGCCGAGCGCAGAAGTGGTCCTGCAACTTTATCCGCCTCCATCCAGTCTATTAATTGTTGCCGGGAAGC…		fig.3f
ISLam cleavage dsDNA substrate, TTTAG TAM	TCAGTGGAACGAAAACTCACGTTAAGGGATTTTGGTCATGAGATTATCAAAAAGGATCTTCACCTAGATCCTTTTAAATTAAAAATGAAGTTTTAAATCAATCTAAAGTATATATGAGTAAACTTGGTCTGACAGTTACCAATGCTTAATCAGTGAGGCACCTATCTCAGCGATCTGTCTATTTCGTTCATCCATAGTTGCCTGACTCCCCGTCGTGTAGATAACTACGATACGGGAGGGCTTACCATCTGGCCCCAGTGCTGCAATGATACCGCGAGACCCACGCTCACCGGCTCCAGATTTATCAGCAATAAACCAGCCAGCCGGAAGGGCCGAGCGCAGAAGTGGTCCTGCAACTTTATCCGCCTCCATCCAGTCTATTAATTGTTGCCGGGAAGC…		fig.3f
Cleavage substrates with NNN TAM	sequence (5'→3')
ISLde6 cleavage dsDNA substrate, AAA TAM	TCAGTGGAACGAAAACTCACGTTAAGGGATTTTGGTCATGAGATTATCAAAAAGGATCTTCACCTAGATCCTTTTAAATTAAAAATGAAGTTTTAAATCAATCTAAAGTATATATGAGTAAACTTGGTCTGACAGTTACCAATGCTTAATCAGTGAGGCACCTATCTCAGCGATCTGTCTATTTCGTTCATCCATAGTTGCCTGACTCCCCGTCGTGTAGATAACTACGATACGGGAGGGCTTACCATCTGGCCCCAGTGCTGCAATGATACCGCGAGACCCACGCTCACCGGCTCCAGATTTATCAGCAATAAACCAGCCAGCCGGAAGGGCCGAGCGCAGAAGTGGTCCTGCAACTTTATCCGCCTCCATCCAGTCTATTAATTGTTGCCGGGAAGC…		fig.3g
ISLde6 cleavage dsDNA substrate, AAT TAM	TCAGTGGAACGAAAACTCACGTTAAGGGATTTTGGTCATGAGATTATCAAAAAGGATCTTCACCTAGATCCTTTTAAATTAAAAATGAAGTTTTAAATCAATCTAAAGTATATATGAGTAAACTTGGTCTGACAGTTACCAATGCTTAATCAGTGAGGCACCTATCTCAGCGATCTGTCTATTTCGTTCATCCATAGTTGCCTGACTCCCCGTCGTGTAGATAACTACGATACGGGAGGGCTTACCATCTGGCCCCAGTGCTGCAATGATACCGCGAGACCCACGCTCACCGGCTCCAGATTTATCAGCAATAAACCAGCCAGCCGGAAGGGCCGAGCGCAGAAGTGGTCCTGCAACTTTATCCGCCTCCATCCAGTCTATTAATTGTTGCCGGGAAGC…		fig.3g
ISLde6 cleavage dsDNA substrate, AAC TAM	TCAGTGGAACGAAAACTCACGTTAAGGGATTTTGGTCATGAGATTATCAAAAAGGATCTTCACCTAGATCCTTTTAAATTAAAAATGAAGTTTTAAATCAATCTAAAGTATATATGAGTAAACTTGGTCTGACAGTTACCAATGCTTAATCAGTGAGGCACCTATCTCAGCGATCTGTCTATTTCGTTCATCCATAGTTGCCTGACTCCCCGTCGTGTAGATAACTACGATACGGGAGGGCTTACCATCTGGCCCCAGTGCTGCAATGATACCGCGAGACCCACGCTCACCGGCTCCAGATTTATCAGCAATAAACCAGCCAGCCGGAAGGGCCGAGCGCAGAAGTGGTCCTGCAACTTTATCCGCCTCCATCCAGTCTATTAATTGTTGCCGGGAAGC…		fig.3g
ISLde6 cleavage dsDNA substrate, AAG TAM	TCAGTGGAACGAAAACTCACGTTAAGGGATTTTGGTCATGAGATTATCAAAAAGGATCTTCACCTAGATCCTTTTAAATTAAAAATGAAGTTTTAAATCAATCTAAAGTATATATGAGTAAACTTGGTCTGACAGTTACCAATGCTTAATCAGTGAGGCACCTATCTCAGCGATCTGTCTATTTCGTTCATCCATAGTTGCCTGACTCCCCGTCGTGTAGATAACTACGATACGGGAGGGCTTACCATCTGGCCCCAGTGCTGCAATGATACCGCGAGACCCACGCTCACCGGCTCCAGATTTATCAGCAATAAACCAGCCAGCCGGAAGGGCCGAGCGCAGAAGTGGTCCTGCAACTTTATCCGCCTCCATCCAGTCTATTAATTGTTGCCGGGAAGC…		fig.3g
ISLde6 cleavage dsDNA substrate, ATA TAM	TCAGTGGAACGAAAACTCACGTTAAGGGATTTTGGTCATGAGATTATCAAAAAGGATCTTCACCTAGATCCTTTTAAATTAAAAATGAAGTTTTAAATCAATCTAAAGTATATATGAGTAAACTTGGTCTGACAGTTACCAATGCTTAATCAGTGAGGCACCTATCTCAGCGATCTGTCTATTTCGTTCATCCATAGTTGCCTGACTCCCCGTCGTGTAGATAACTACGATACGGGAGGGCTTACCATCTGGCCCCAGTGCTGCAATGATACCGCGAGACCCACGCTCACCGGCTCCAGATTTATCAGCAATAAACCAGCCAGCCGGAAGGGCCGAGCGCAGAAGTGGTCCTGCAACTTTATCCGCCTCCATCCAGTCTATTAATTGTTGCCGGGAAGC…		fig.3g
ISLde6 cleavage dsDNA substrate, ATT TAM	TCAGTGGAACGAAAACTCACGTTAAGGGATTTTGGTCATGAGATTATCAAAAAGGATCTTCACCTAGATCCTTTTAAATTAAAAATGAAGTTTTAAATCAATCTAAAGTATATATGAGTAAACTTGGTCTGACAGTTACCAATGCTTAATCAGTGAGGCACCTATCTCAGCGATCTGTCTATTTCGTTCATCCATAGTTGCCTGACTCCCCGTCGTGTAGATAACTACGATACGGGAGGGCTTACCATCTGGCCCCAGTGCTGCAATGATACCGCGAGACCCACGCTCACCGGCTCCAGATTTATCAGCAATAAACCAGCCAGCCGGAAGGGCCGAGCGCAGAAGTGGTCCTGCAACTTTATCCGCCTCCATCCAGTCTATTAATTGTTGCCGGGAAGC…		fig.3g
ISLde6 cleavage dsDNA substrate, ATC TAM	TCAGTGGAACGAAAACTCACGTTAAGGGATTTTGGTCATGAGATTATCAAAAAGGATCTTCACCTAGATCCTTTTAAATTAAAAATGAAGTTTTAAATCAATCTAAAGTATATATGAGTAAACTTGGTCTGACAGTTACCAATGCTTAATCAGTGAGGCACCTATCTCAGCGATCTGTCTATTTCGTTCATCCATAGTTGCCTGACTCCCCGTCGTGTAGATAACTACGATACGGGAGGGCTTACCATCTGGCCCCAGTGCTGCAATGATACCGCGAGACCCACGCTCACCGGCTCCAGATTTATCAGCAATAAACCAGCCAGCCGGAAGGGCCGAGCGCAGAAGTGGTCCTGCAACTTTATCCGCCTCCATCCAGTCTATTAATTGTTGCCGGGAAGC…		fig.3g
ISLde6 cleavage dsDNA substrate, ATG TAM	TCAGTGGAACGAAAACTCACGTTAAGGGATTTTGGTCATGAGATTATCAAAAAGGATCTTCACCTAGATCCTTTTAAATTAAAAATGAAGTTTTAAATCAATCTAAAGTATATATGAGTAAACTTGGTCTGACAGTTACCAATGCTTAATCAGTGAGGCACCTATCTCAGCGATCTGTCTATTTCGTTCATCCATAGTTGCCTGACTCCCCGTCGTGTAGATAACTACGATACGGGAGGGCTTACCATCTGGCCCCAGTGCTGCAATGATACCGCGAGACCCACGCTCACCGGCTCCAGATTTATCAGCAATAAACCAGCCAGCCGGAAGGGCCGAGCGCAGAAGTGGTCCTGCAACTTTATCCGCCTCCATCCAGTCTATTAATTGTTGCCGGGAAGC…		fig.3g
ISLde6 cleavage dsDNA substrate, ACA TAM	TCAGTGGAACGAAAACTCACGTTAAGGGATTTTGGTCATGAGATTATCAAAAAGGATCTTCACCTAGATCCTTTTAAATTAAAAATGAAGTTTTAAATCAATCTAAAGTATATATGAGTAAACTTGGTCTGACAGTTACCAATGCTTAATCAGTGAGGCACCTATCTCAGCGATCTGTCTATTTCGTTCATCCATAGTTGCCTGACTCCCCGTCGTGTAGATAACTACGATACGGGAGGGCTTACCATCTGGCCCCAGTGCTGCAATGATACCGCGAGACCCACGCTCACCGGCTCCAGATTTATCAGCAATAAACCAGCCAGCCGGAAGGGCCGAGCGCAGAAGTGGTCCTGCAACTTTATCCGCCTCCATCCAGTCTATTAATTGTTGCCGGGAAGC…		fig.3g
ISLde6 cleavage dsDNA substrate, ACT TAM	TCAGTGGAACGAAAACTCACGTTAAGGGATTTTGGTCATGAGATTATCAAAAAGGATCTTCACCTAGATCCTTTTAAATTAAAAATGAAGTTTTAAATCAATCTAAAGTATATATGAGTAAACTTGGTCTGACAGTTACCAATGCTTAATCAGTGAGGCACCTATCTCAGCGATCTGTCTATTTCGTTCATCCATAGTTGCCTGACTCCCCGTCGTGTAGATAACTACGATACGGGAGGGCTTACCATCTGGCCCCAGTGCTGCAATGATACCGCGAGACCCACGCTCACCGGCTCCAGATTTATCAGCAATAAACCAGCCAGCCGGAAGGGCCGAGCGCAGAAGTGGTCCTGCAACTTTATCCGCCTCCATCCAGTCTATTAATTGTTGCCGGGAAGC…		fig.3g
ISLde6 cleavage dsDNA substrate, ACC TAM	TCAGTGGAACGAAAACTCACGTTAAGGGATTTTGGTCATGAGATTATCAAAAAGGATCTTCACCTAGATCCTTTTAAATTAAAAATGAAGTTTTAAATCAATCTAAAGTATATATGAGTAAACTTGGTCTGACAGTTACCAATGCTTAATCAGTGAGGCACCTATCTCAGCGATCTGTCTATTTCGTTCATCCATAGTTGCCTGACTCCCCGTCGTGTAGATAACTACGATACGGGAGGGCTTACCATCTGGCCCCAGTGCTGCAATGATACCGCGAGACCCACGCTCACCGGCTCCAGATTTATCAGCAATAAACCAGCCAGCCGGAAGGGCCGAGCGCAGAAGTGGTCCTGCAACTTTATCCGCCTCCATCCAGTCTATTAATTGTTGCCGGGAAGC…		fig.3g
ISLde6 cleavage dsDNA substrate, ACG TAM	TCAGTGGAACGAAAACTCACGTTAAGGGATTTTGGTCATGAGATTATCAAAAAGGATCTTCACCTAGATCCTTTTAAATTAAAAATGAAGTTTTAAATCAATCTAAAGTATATATGAGTAAACTTGGTCTGACAGTTACCAATGCTTAATCAGTGAGGCACCTATCTCAGCGATCTGTCTATTTCGTTCATCCATAGTTGCCTGACTCCCCGTCGTGTAGATAACTACGATACGGGAGGGCTTACCATCTGGCCCCAGTGCTGCAATGATACCGCGAGACCCACGCTCACCGGCTCCAGATTTATCAGCAATAAACCAGCCAGCCGGAAGGGCCGAGCGCAGAAGTGGTCCTGCAACTTTATCCGCCTCCATCCAGTCTATTAATTGTTGCCGGGAAGC…		fig.3g
ISLde6 cleavage dsDNA substrate, AGA TAM	TCAGTGGAACGAAAACTCACGTTAAGGGATTTTGGTCATGAGATTATCAAAAAGGATCTTCACCTAGATCCTTTTAAATTAAAAATGAAGTTTTAAATCAATCTAAAGTATATATGAGTAAACTTGGTCTGACAGTTACCAATGCTTAATCAGTGAGGCACCTATCTCAGCGATCTGTCTATTTCGTTCATCCATAGTTGCCTGACTCCCCGTCGTGTAGATAACTACGATACGGGAGGGCTTACCATCTGGCCCCAGTGCTGCAATGATACCGCGAGACCCACGCTCACCGGCTCCAGATTTATCAGCAATAAACCAGCCAGCCGGAAGGGCCGAGCGCAGAAGTGGTCCTGCAACTTTATCCGCCTCCATCCAGTCTATTAATTGTTGCCGGGAAGC…		fig.3g
ISLde6 cleavage dsDNA substrate, AGT TAM	TCAGTGGAACGAAAACTCACGTTAAGGGATTTTGGTCATGAGATTATCAAAAAGGATCTTCACCTAGATCCTTTTAAATTAAAAATGAAGTTTTAAATCAATCTAAAGTATATATGAGTAAACTTGGTCTGACAGTTACCAATGCTTAATCAGTGAGGCACCTATCTCAGCGATCTGTCTATTTCGTTCATCCATAGTTGCCTGACTCCCCGTCGTGTAGATAACTACGATACGGGAGGGCTTACCATCTGGCCCCAGTGCTGCAATGATACCGCGAGACCCACGCTCACCGGCTCCAGATTTATCAGCAATAAACCAGCCAGCCGGAAGGGCCGAGCGCAGAAGTGGTCCTGCAACTTTATCCGCCTCCATCCAGTCTATTAATTGTTGCCGGGAAGC…		fig.3g
ISLde6 cleavage dsDNA substrate, AGC TAM	TCAGTGGAACGAAAACTCACGTTAAGGGATTTTGGTCATGAGATTATCAAAAAGGATCTTCACCTAGATCCTTTTAAATTAAAAATGAAGTTTTAAATCAATCTAAAGTATATATGAGTAAACTTGGTCTGACAGTTACCAATGCTTAATCAGTGAGGCACCTATCTCAGCGATCTGTCTATTTCGTTCATCCATAGTTGCCTGACTCCCCGTCGTGTAGATAACTACGATACGGGAGGGCTTACCATCTGGCCCCAGTGCTGCAATGATACCGCGAGACCCACGCTCACCGGCTCCAGATTTATCAGCAATAAACCAGCCAGCCGGAAGGGCCGAGCGCAGAAGTGGTCCTGCAACTTTATCCGCCTCCATCCAGTCTATTAATTGTTGCCGGGAAGC…		fig.3g
ISLde6 cleavage dsDNA substrate, AGG TAM	TCAGTGGAACGAAAACTCACGTTAAGGGATTTTGGTCATGAGATTATCAAAAAGGATCTTCACCTAGATCCTTTTAAATTAAAAATGAAGTTTTAAATCAATCTAAAGTATATATGAGTAAACTTGGTCTGACAGTTACCAATGCTTAATCAGTGAGGCACCTATCTCAGCGATCTGTCTATTTCGTTCATCCATAGTTGCCTGACTCCCCGTCGTGTAGATAACTACGATACGGGAGGGCTTACCATCTGGCCCCAGTGCTGCAATGATACCGCGAGACCCACGCTCACCGGCTCCAGATTTATCAGCAATAAACCAGCCAGCCGGAAGGGCCGAGCGCAGAAGTGGTCCTGCAACTTTATCCGCCTCCATCCAGTCTATTAATTGTTGCCGGGAAGC…		fig.3g
ISLde6 cleavage dsDNA substrate, TAA TAM	TCAGTGGAACGAAAACTCACGTTAAGGGATTTTGGTCATGAGATTATCAAAAAGGATCTTCACCTAGATCCTTTTAAATTAAAAATGAAGTTTTAAATCAATCTAAAGTATATATGAGTAAACTTGGTCTGACAGTTACCAATGCTTAATCAGTGAGGCACCTATCTCAGCGATCTGTCTATTTCGTTCATCCATAGTTGCCTGACTCCCCGTCGTGTAGATAACTACGATACGGGAGGGCTTACCATCTGGCCCCAGTGCTGCAATGATACCGCGAGACCCACGCTCACCGGCTCCAGATTTATCAGCAATAAACCAGCCAGCCGGAAGGGCCGAGCGCAGAAGTGGTCCTGCAACTTTATCCGCCTCCATCCAGTCTATTAATTGTTGCCGGGAAGC…		fig.3g
ISLde6 cleavage dsDNA substrate, TAT TAM	TCAGTGGAACGAAAACTCACGTTAAGGGATTTTGGTCATGAGATTATCAAAAAGGATCTTCACCTAGATCCTTTTAAATTAAAAATGAAGTTTTAAATCAATCTAAAGTATATATGAGTAAACTTGGTCTGACAGTTACCAATGCTTAATCAGTGAGGCACCTATCTCAGCGATCTGTCTATTTCGTTCATCCATAGTTGCCTGACTCCCCGTCGTGTAGATAACTACGATACGGGAGGGCTTACCATCTGGCCCCAGTGCTGCAATGATACCGCGAGACCCACGCTCACCGGCTCCAGATTTATCAGCAATAAACCAGCCAGCCGGAAGGGCCGAGCGCAGAAGTGGTCCTGCAACTTTATCCGCCTCCATCCAGTCTATTAATTGTTGCCGGGAAGC…		fig.3g
ISLde6 cleavage dsDNA substrate, TAC TAM	TCAGTGGAACGAAAACTCACGTTAAGGGATTTTGGTCATGAGATTATCAAAAAGGATCTTCACCTAGATCCTTTTAAATTAAAAATGAAGTTTTAAATCAATCTAAAGTATATATGAGTAAACTTGGTCTGACAGTTACCAATGCTTAATCAGTGAGGCACCTATCTCAGCGATCTGTCTATTTCGTTCATCCATAGTTGCCTGACTCCCCGTCGTGTAGATAACTACGATACGGGAGGGCTTACCATCTGGCCCCAGTGCTGCAATGATACCGCGAGACCCACGCTCACCGGCTCCAGATTTATCAGCAATAAACCAGCCAGCCGGAAGGGCCGAGCGCAGAAGTGGTCCTGCAACTTTATCCGCCTCCATCCAGTCTATTAATTGTTGCCGGGAAGC…		fig.3g
ISLde6 cleavage dsDNA substrate, TAG TAM	TCAGTGGAACGAAAACTCACGTTAAGGGATTTTGGTCATGAGATTATCAAAAAGGATCTTCACCTAGATCCTTTTAAATTAAAAATGAAGTTTTAAATCAATCTAAAGTATATATGAGTAAACTTGGTCTGACAGTTACCAATGCTTAATCAGTGAGGCACCTATCTCAGCGATCTGTCTATTTCGTTCATCCATAGTTGCCTGACTCCCCGTCGTGTAGATAACTACGATACGGGAGGGCTTACCATCTGGCCCCAGTGCTGCAATGATACCGCGAGACCCACGCTCACCGGCTCCAGATTTATCAGCAATAAACCAGCCAGCCGGAAGGGCCGAGCGCAGAAGTGGTCCTGCAACTTTATCCGCCTCCATCCAGTCTATTAATTGTTGCCGGGAAGC…		fig.3g
ISLde6 cleavage dsDNA substrate, TTA TAM	TCAGTGGAACGAAAACTCACGTTAAGGGATTTTGGTCATGAGATTATCAAAAAGGATCTTCACCTAGATCCTTTTAAATTAAAAATGAAGTTTTAAATCAATCTAAAGTATATATGAGTAAACTTGGTCTGACAGTTACCAATGCTTAATCAGTGAGGCACCTATCTCAGCGATCTGTCTATTTCGTTCATCCATAGTTGCCTGACTCCCCGTCGTGTAGATAACTACGATACGGGAGGGCTTACCATCTGGCCCCAGTGCTGCAATGATACCGCGAGACCCACGCTCACCGGCTCCAGATTTATCAGCAATAAACCAGCCAGCCGGAAGGGCCGAGCGCAGAAGTGGTCCTGCAACTTTATCCGCCTCCATCCAGTCTATTAATTGTTGCCGGGAAGC…		fig.3g
ISLde6 cleavage dsDNA substrate, TTT TAM	TCAGTGGAACGAAAACTCACGTTAAGGGATTTTGGTCATGAGATTATCAAAAAGGATCTTCACCTAGATCCTTTTAAATTAAAAATGAAGTTTTAAATCAATCTAAAGTATATATGAGTAAACTTGGTCTGACAGTTACCAATGCTTAATCAGTGAGGCACCTATCTCAGCGATCTGTCTATTTCGTTCATCCATAGTTGCCTGACTCCCCGTCGTGTAGATAACTACGATACGGGAGGGCTTACCATCTGGCCCCAGTGCTGCAATGATACCGCGAGACCCACGCTCACCGGCTCCAGATTTATCAGCAATAAACCAGCCAGCCGGAAGGGCCGAGCGCAGAAGTGGTCCTGCAACTTTATCCGCCTCCATCCAGTCTATTAATTGTTGCCGGGAAGC…		fig.3g
ISLde6 cleavage dsDNA substrate, TTC TAM	TCAGTGGAACGAAAACTCACGTTAAGGGATTTTGGTCATGAGATTATCAAAAAGGATCTTCACCTAGATCCTTTTAAATTAAAAATGAAGTTTTAAATCAATCTAAAGTATATATGAGTAAACTTGGTCTGACAGTTACCAATGCTTAATCAGTGAGGCACCTATCTCAGCGATCTGTCTATTTCGTTCATCCATAGTTGCCTGACTCCCCGTCGTGTAGATAACTACGATACGGGAGGGCTTACCATCTGGCCCCAGTGCTGCAATGATACCGCGAGACCCACGCTCACCGGCTCCAGATTTATCAGCAATAAACCAGCCAGCCGGAAGGGCCGAGCGCAGAAGTGGTCCTGCAACTTTATCCGCCTCCATCCAGTCTATTAATTGTTGCCGGGAAGC…		fig.3g
ISLde6 cleavage dsDNA substrate, TTG TAM	TCAGTGGAACGAAAACTCACGTTAAGGGATTTTGGTCATGAGATTATCAAAAAGGATCTTCACCTAGATCCTTTTAAATTAAAAATGAAGTTTTAAATCAATCTAAAGTATATATGAGTAAACTTGGTCTGACAGTTACCAATGCTTAATCAGTGAGGCACCTATCTCAGCGATCTGTCTATTTCGTTCATCCATAGTTGCCTGACTCCCCGTCGTGTAGATAACTACGATACGGGAGGGCTTACCATCTGGCCCCAGTGCTGCAATGATACCGCGAGACCCACGCTCACCGGCTCCAGATTTATCAGCAATAAACCAGCCAGCCGGAAGGGCCGAGCGCAGAAGTGGTCCTGCAACTTTATCCGCCTCCATCCAGTCTATTAATTGTTGCCGGGAAGC…		fig.3g
ISLde6 cleavage dsDNA substrate, TCA TAM	TCAGTGGAACGAAAACTCACGTTAAGGGATTTTGGTCATGAGATTATCAAAAAGGATCTTCACCTAGATCCTTTTAAATTAAAAATGAAGTTTTAAATCAATCTAAAGTATATATGAGTAAACTTGGTCTGACAGTTACCAATGCTTAATCAGTGAGGCACCTATCTCAGCGATCTGTCTATTTCGTTCATCCATAGTTGCCTGACTCCCCGTCGTGTAGATAACTACGATACGGGAGGGCTTACCATCTGGCCCCAGTGCTGCAATGATACCGCGAGACCCACGCTCACCGGCTCCAGATTTATCAGCAATAAACCAGCCAGCCGGAAGGGCCGAGCGCAGAAGTGGTCCTGCAACTTTATCCGCCTCCATCCAGTCTATTAATTGTTGCCGGGAAGC…		fig.3g
ISLde6 cleavage dsDNA substrate, TCT TAM	TCAGTGGAACGAAAACTCACGTTAAGGGATTTTGGTCATGAGATTATCAAAAAGGATCTTCACCTAGATCCTTTTAAATTAAAAATGAAGTTTTAAATCAATCTAAAGTATATATGAGTAAACTTGGTCTGACAGTTACCAATGCTTAATCAGTGAGGCACCTATCTCAGCGATCTGTCTATTTCGTTCATCCATAGTTGCCTGACTCCCCGTCGTGTAGATAACTACGATACGGGAGGGCTTACCATCTGGCCCCAGTGCTGCAATGATACCGCGAGACCCACGCTCACCGGCTCCAGATTTATCAGCAATAAACCAGCCAGCCGGAAGGGCCGAGCGCAGAAGTGGTCCTGCAACTTTATCCGCCTCCATCCAGTCTATTAATTGTTGCCGGGAAGC…		fig.3g
ISLde6 cleavage dsDNA substrate, TCC TAM	TCAGTGGAACGAAAACTCACGTTAAGGGATTTTGGTCATGAGATTATCAAAAAGGATCTTCACCTAGATCCTTTTAAATTAAAAATGAAGTTTTAAATCAATCTAAAGTATATATGAGTAAACTTGGTCTGACAGTTACCAATGCTTAATCAGTGAGGCACCTATCTCAGCGATCTGTCTATTTCGTTCATCCATAGTTGCCTGACTCCCCGTCGTGTAGATAACTACGATACGGGAGGGCTTACCATCTGGCCCCAGTGCTGCAATGATACCGCGAGACCCACGCTCACCGGCTCCAGATTTATCAGCAATAAACCAGCCAGCCGGAAGGGCCGAGCGCAGAAGTGGTCCTGCAACTTTATCCGCCTCCATCCAGTCTATTAATTGTTGCCGGGAAGC…		fig.3g
ISLde6 cleavage dsDNA substrate, TCG TAM	TCAGTGGAACGAAAACTCACGTTAAGGGATTTTGGTCATGAGATTATCAAAAAGGATCTTCACCTAGATCCTTTTAAATTAAAAATGAAGTTTTAAATCAATCTAAAGTATATATGAGTAAACTTGGTCTGACAGTTACCAATGCTTAATCAGTGAGGCACCTATCTCAGCGATCTGTCTATTTCGTTCATCCATAGTTGCCTGACTCCCCGTCGTGTAGATAACTACGATACGGGAGGGCTTACCATCTGGCCCCAGTGCTGCAATGATACCGCGAGACCCACGCTCACCGGCTCCAGATTTATCAGCAATAAACCAGCCAGCCGGAAGGGCCGAGCGCAGAAGTGGTCCTGCAACTTTATCCGCCTCCATCCAGTCTATTAATTGTTGCCGGGAAGC…		fig.3g
ISLde6 cleavage dsDNA substrate, TGA TAM	TCAGTGGAACGAAAACTCACGTTAAGGGATTTTGGTCATGAGATTATCAAAAAGGATCTTCACCTAGATCCTTTTAAATTAAAAATGAAGTTTTAAATCAATCTAAAGTATATATGAGTAAACTTGGTCTGACAGTTACCAATGCTTAATCAGTGAGGCACCTATCTCAGCGATCTGTCTATTTCGTTCATCCATAGTTGCCTGACTCCCCGTCGTGTAGATAACTACGATACGGGAGGGCTTACCATCTGGCCCCAGTGCTGCAATGATACCGCGAGACCCACGCTCACCGGCTCCAGATTTATCAGCAATAAACCAGCCAGCCGGAAGGGCCGAGCGCAGAAGTGGTCCTGCAACTTTATCCGCCTCCATCCAGTCTATTAATTGTTGCCGGGAAGC…		fig.3g
ISLde6 cleavage dsDNA substrate, TGT TAM	TCAGTGGAACGAAAACTCACGTTAAGGGATTTTGGTCATGAGATTATCAAAAAGGATCTTCACCTAGATCCTTTTAAATTAAAAATGAAGTTTTAAATCAATCTAAAGTATATATGAGTAAACTTGGTCTGACAGTTACCAATGCTTAATCAGTGAGGCACCTATCTCAGCGATCTGTCTATTTCGTTCATCCATAGTTGCCTGACTCCCCGTCGTGTAGATAACTACGATACGGGAGGGCTTACCATCTGGCCCCAGTGCTGCAATGATACCGCGAGACCCACGCTCACCGGCTCCAGATTTATCAGCAATAAACCAGCCAGCCGGAAGGGCCGAGCGCAGAAGTGGTCCTGCAACTTTATCCGCCTCCATCCAGTCTATTAATTGTTGCCGGGAAGC…		fig.3g
ISLde6 cleavage dsDNA substrate, TGC TAM	TCAGTGGAACGAAAACTCACGTTAAGGGATTTTGGTCATGAGATTATCAAAAAGGATCTTCACCTAGATCCTTTTAAATTAAAAATGAAGTTTTAAATCAATCTAAAGTATATATGAGTAAACTTGGTCTGACAGTTACCAATGCTTAATCAGTGAGGCACCTATCTCAGCGATCTGTCTATTTCGTTCATCCATAGTTGCCTGACTCCCCGTCGTGTAGATAACTACGATACGGGAGGGCTTACCATCTGGCCCCAGTGCTGCAATGATACCGCGAGACCCACGCTCACCGGCTCCAGATTTATCAGCAATAAACCAGCCAGCCGGAAGGGCCGAGCGCAGAAGTGGTCCTGCAACTTTATCCGCCTCCATCCAGTCTATTAATTGTTGCCGGGAAGC…		fig.3g
ISLde6 cleavage dsDNA substrate, TGG TAM	TCAGTGGAACGAAAACTCACGTTAAGGGATTTTGGTCATGAGATTATCAAAAAGGATCTTCACCTAGATCCTTTTAAATTAAAAATGAAGTTTTAAATCAATCTAAAGTATATATGAGTAAACTTGGTCTGACAGTTACCAATGCTTAATCAGTGAGGCACCTATCTCAGCGATCTGTCTATTTCGTTCATCCATAGTTGCCTGACTCCCCGTCGTGTAGATAACTACGATACGGGAGGGCTTACCATCTGGCCCCAGTGCTGCAATGATACCGCGAGACCCACGCTCACCGGCTCCAGATTTATCAGCAATAAACCAGCCAGCCGGAAGGGCCGAGCGCAGAAGTGGTCCTGCAACTTTATCCGCCTCCATCCAGTCTATTAATTGTTGCCGGGAAGC…		fig.3g
ISLde6 cleavage dsDNA substrate, CAA TAM	TCAGTGGAACGAAAACTCACGTTAAGGGATTTTGGTCATGAGATTATCAAAAAGGATCTTCACCTAGATCCTTTTAAATTAAAAATGAAGTTTTAAATCAATCTAAAGTATATATGAGTAAACTTGGTCTGACAGTTACCAATGCTTAATCAGTGAGGCACCTATCTCAGCGATCTGTCTATTTCGTTCATCCATAGTTGCCTGACTCCCCGTCGTGTAGATAACTACGATACGGGAGGGCTTACCATCTGGCCCCAGTGCTGCAATGATACCGCGAGACCCACGCTCACCGGCTCCAGATTTATCAGCAATAAACCAGCCAGCCGGAAGGGCCGAGCGCAGAAGTGGTCCTGCAACTTTATCCGCCTCCATCCAGTCTATTAATTGTTGCCGGGAAGC…		fig.3g
ISLde6 cleavage dsDNA substrate, CAT TAM	TCAGTGGAACGAAAACTCACGTTAAGGGATTTTGGTCATGAGATTATCAAAAAGGATCTTCACCTAGATCCTTTTAAATTAAAAATGAAGTTTTAAATCAATCTAAAGTATATATGAGTAAACTTGGTCTGACAGTTACCAATGCTTAATCAGTGAGGCACCTATCTCAGCGATCTGTCTATTTCGTTCATCCATAGTTGCCTGACTCCCCGTCGTGTAGATAACTACGATACGGGAGGGCTTACCATCTGGCCCCAGTGCTGCAATGATACCGCGAGACCCACGCTCACCGGCTCCAGATTTATCAGCAATAAACCAGCCAGCCGGAAGGGCCGAGCGCAGAAGTGGTCCTGCAACTTTATCCGCCTCCATCCAGTCTATTAATTGTTGCCGGGAAGC…		fig.3g
ISLde6 cleavage dsDNA substrate, CAC TAM	TCAGTGGAACGAAAACTCACGTTAAGGGATTTTGGTCATGAGATTATCAAAAAGGATCTTCACCTAGATCCTTTTAAATTAAAAATGAAGTTTTAAATCAATCTAAAGTATATATGAGTAAACTTGGTCTGACAGTTACCAATGCTTAATCAGTGAGGCACCTATCTCAGCGATCTGTCTATTTCGTTCATCCATAGTTGCCTGACTCCCCGTCGTGTAGATAACTACGATACGGGAGGGCTTACCATCTGGCCCCAGTGCTGCAATGATACCGCGAGACCCACGCTCACCGGCTCCAGATTTATCAGCAATAAACCAGCCAGCCGGAAGGGCCGAGCGCAGAAGTGGTCCTGCAACTTTATCCGCCTCCATCCAGTCTATTAATTGTTGCCGGGAAGC…		fig.3g
ISLde6 cleavage dsDNA substrate, CAG TAM	TCAGTGGAACGAAAACTCACGTTAAGGGATTTTGGTCATGAGATTATCAAAAAGGATCTTCACCTAGATCCTTTTAAATTAAAAATGAAGTTTTAAATCAATCTAAAGTATATATGAGTAAACTTGGTCTGACAGTTACCAATGCTTAATCAGTGAGGCACCTATCTCAGCGATCTGTCTATTTCGTTCATCCATAGTTGCCTGACTCCCCGTCGTGTAGATAACTACGATACGGGAGGGCTTACCATCTGGCCCCAGTGCTGCAATGATACCGCGAGACCCACGCTCACCGGCTCCAGATTTATCAGCAATAAACCAGCCAGCCGGAAGGGCCGAGCGCAGAAGTGGTCCTGCAACTTTATCCGCCTCCATCCAGTCTATTAATTGTTGCCGGGAAGC…		fig.3g
ISLde6 cleavage dsDNA substrate, CTA TAM	TCAGTGGAACGAAAACTCACGTTAAGGGATTTTGGTCATGAGATTATCAAAAAGGATCTTCACCTAGATCCTTTTAAATTAAAAATGAAGTTTTAAATCAATCTAAAGTATATATGAGTAAACTTGGTCTGACAGTTACCAATGCTTAATCAGTGAGGCACCTATCTCAGCGATCTGTCTATTTCGTTCATCCATAGTTGCCTGACTCCCCGTCGTGTAGATAACTACGATACGGGAGGGCTTACCATCTGGCCCCAGTGCTGCAATGATACCGCGAGACCCACGCTCACCGGCTCCAGATTTATCAGCAATAAACCAGCCAGCCGGAAGGGCCGAGCGCAGAAGTGGTCCTGCAACTTTATCCGCCTCCATCCAGTCTATTAATTGTTGCCGGGAAGC…		fig.3g
ISLde6 cleavage dsDNA substrate, CTT TAM	TCAGTGGAACGAAAACTCACGTTAAGGGATTTTGGTCATGAGATTATCAAAAAGGATCTTCACCTAGATCCTTTTAAATTAAAAATGAAGTTTTAAATCAATCTAAAGTATATATGAGTAAACTTGGTCTGACAGTTACCAATGCTTAATCAGTGAGGCACCTATCTCAGCGATCTGTCTATTTCGTTCATCCATAGTTGCCTGACTCCCCGTCGTGTAGATAACTACGATACGGGAGGGCTTACCATCTGGCCCCAGTGCTGCAATGATACCGCGAGACCCACGCTCACCGGCTCCAGATTTATCAGCAATAAACCAGCCAGCCGGAAGGGCCGAGCGCAGAAGTGGTCCTGCAACTTTATCCGCCTCCATCCAGTCTATTAATTGTTGCCGGGAAGC…		fig.3g
ISLde6 cleavage dsDNA substrate, CTC TAM	TCAGTGGAACGAAAACTCACGTTAAGGGATTTTGGTCATGAGATTATCAAAAAGGATCTTCACCTAGATCCTTTTAAATTAAAAATGAAGTTTTAAATCAATCTAAAGTATATATGAGTAAACTTGGTCTGACAGTTACCAATGCTTAATCAGTGAGGCACCTATCTCAGCGATCTGTCTATTTCGTTCATCCATAGTTGCCTGACTCCCCGTCGTGTAGATAACTACGATACGGGAGGGCTTACCATCTGGCCCCAGTGCTGCAATGATACCGCGAGACCCACGCTCACCGGCTCCAGATTTATCAGCAATAAACCAGCCAGCCGGAAGGGCCGAGCGCAGAAGTGGTCCTGCAACTTTATCCGCCTCCATCCAGTCTATTAATTGTTGCCGGGAAGC…		fig.3g
ISLde6 cleavage dsDNA substrate, CTG TAM	TCAGTGGAACGAAAACTCACGTTAAGGGATTTTGGTCATGAGATTATCAAAAAGGATCTTCACCTAGATCCTTTTAAATTAAAAATGAAGTTTTAAATCAATCTAAAGTATATATGAGTAAACTTGGTCTGACAGTTACCAATGCTTAATCAGTGAGGCACCTATCTCAGCGATCTGTCTATTTCGTTCATCCATAGTTGCCTGACTCCCCGTCGTGTAGATAACTACGATACGGGAGGGCTTACCATCTGGCCCCAGTGCTGCAATGATACCGCGAGACCCACGCTCACCGGCTCCAGATTTATCAGCAATAAACCAGCCAGCCGGAAGGGCCGAGCGCAGAAGTGGTCCTGCAACTTTATCCGCCTCCATCCAGTCTATTAATTGTTGCCGGGAAGC…		fig.3g
ISLde6 cleavage dsDNA substrate, CCA TAM	TCAGTGGAACGAAAACTCACGTTAAGGGATTTTGGTCATGAGATTATCAAAAAGGATCTTCACCTAGATCCTTTTAAATTAAAAATGAAGTTTTAAATCAATCTAAAGTATATATGAGTAAACTTGGTCTGACAGTTACCAATGCTTAATCAGTGAGGCACCTATCTCAGCGATCTGTCTATTTCGTTCATCCATAGTTGCCTGACTCCCCGTCGTGTAGATAACTACGATACGGGAGGGCTTACCATCTGGCCCCAGTGCTGCAATGATACCGCGAGACCCACGCTCACCGGCTCCAGATTTATCAGCAATAAACCAGCCAGCCGGAAGGGCCGAGCGCAGAAGTGGTCCTGCAACTTTATCCGCCTCCATCCAGTCTATTAATTGTTGCCGGGAAGC…		fig.3g
ISLde6 cleavage dsDNA substrate, CCT TAM	TCAGTGGAACGAAAACTCACGTTAAGGGATTTTGGTCATGAGATTATCAAAAAGGATCTTCACCTAGATCCTTTTAAATTAAAAATGAAGTTTTAAATCAATCTAAAGTATATATGAGTAAACTTGGTCTGACAGTTACCAATGCTTAATCAGTGAGGCACCTATCTCAGCGATCTGTCTATTTCGTTCATCCATAGTTGCCTGACTCCCCGTCGTGTAGATAACTACGATACGGGAGGGCTTACCATCTGGCCCCAGTGCTGCAATGATACCGCGAGACCCACGCTCACCGGCTCCAGATTTATCAGCAATAAACCAGCCAGCCGGAAGGGCCGAGCGCAGAAGTGGTCCTGCAACTTTATCCGCCTCCATCCAGTCTATTAATTGTTGCCGGGAAGC…		fig.3g
ISLde6 cleavage dsDNA substrate, CCC TAM	TCAGTGGAACGAAAACTCACGTTAAGGGATTTTGGTCATGAGATTATCAAAAAGGATCTTCACCTAGATCCTTTTAAATTAAAAATGAAGTTTTAAATCAATCTAAAGTATATATGAGTAAACTTGGTCTGACAGTTACCAATGCTTAATCAGTGAGGCACCTATCTCAGCGATCTGTCTATTTCGTTCATCCATAGTTGCCTGACTCCCCGTCGTGTAGATAACTACGATACGGGAGGGCTTACCATCTGGCCCCAGTGCTGCAATGATACCGCGAGACCCACGCTCACCGGCTCCAGATTTATCAGCAATAAACCAGCCAGCCGGAAGGGCCGAGCGCAGAAGTGGTCCTGCAACTTTATCCGCCTCCATCCAGTCTATTAATTGTTGCCGGGAAGC…		fig.3g
ISLde6 cleavage dsDNA substrate, CCG TAM	TCAGTGGAACGAAAACTCACGTTAAGGGATTTTGGTCATGAGATTATCAAAAAGGATCTTCACCTAGATCCTTTTAAATTAAAAATGAAGTTTTAAATCAATCTAAAGTATATATGAGTAAACTTGGTCTGACAGTTACCAATGCTTAATCAGTGAGGCACCTATCTCAGCGATCTGTCTATTTCGTTCATCCATAGTTGCCTGACTCCCCGTCGTGTAGATAACTACGATACGGGAGGGCTTACCATCTGGCCCCAGTGCTGCAATGATACCGCGAGACCCACGCTCACCGGCTCCAGATTTATCAGCAATAAACCAGCCAGCCGGAAGGGCCGAGCGCAGAAGTGGTCCTGCAACTTTATCCGCCTCCATCCAGTCTATTAATTGTTGCCGGGAAGC…		fig.3g
ISLde6 cleavage dsDNA substrate, CGA TAM	TCAGTGGAACGAAAACTCACGTTAAGGGATTTTGGTCATGAGATTATCAAAAAGGATCTTCACCTAGATCCTTTTAAATTAAAAATGAAGTTTTAAATCAATCTAAAGTATATATGAGTAAACTTGGTCTGACAGTTACCAATGCTTAATCAGTGAGGCACCTATCTCAGCGATCTGTCTATTTCGTTCATCCATAGTTGCCTGACTCCCCGTCGTGTAGATAACTACGATACGGGAGGGCTTACCATCTGGCCCCAGTGCTGCAATGATACCGCGAGACCCACGCTCACCGGCTCCAGATTTATCAGCAATAAACCAGCCAGCCGGAAGGGCCGAGCGCAGAAGTGGTCCTGCAACTTTATCCGCCTCCATCCAGTCTATTAATTGTTGCCGGGAAGC…		fig.3g
ISLde6 cleavage dsDNA substrate, CGT TAM	TCAGTGGAACGAAAACTCACGTTAAGGGATTTTGGTCATGAGATTATCAAAAAGGATCTTCACCTAGATCCTTTTAAATTAAAAATGAAGTTTTAAATCAATCTAAAGTATATATGAGTAAACTTGGTCTGACAGTTACCAATGCTTAATCAGTGAGGCACCTATCTCAGCGATCTGTCTATTTCGTTCATCCATAGTTGCCTGACTCCCCGTCGTGTAGATAACTACGATACGGGAGGGCTTACCATCTGGCCCCAGTGCTGCAATGATACCGCGAGACCCACGCTCACCGGCTCCAGATTTATCAGCAATAAACCAGCCAGCCGGAAGGGCCGAGCGCAGAAGTGGTCCTGCAACTTTATCCGCCTCCATCCAGTCTATTAATTGTTGCCGGGAAGC…		fig.3g
ISLde6 cleavage dsDNA substrate, CGC TAM	TCAGTGGAACGAAAACTCACGTTAAGGGATTTTGGTCATGAGATTATCAAAAAGGATCTTCACCTAGATCCTTTTAAATTAAAAATGAAGTTTTAAATCAATCTAAAGTATATATGAGTAAACTTGGTCTGACAGTTACCAATGCTTAATCAGTGAGGCACCTATCTCAGCGATCTGTCTATTTCGTTCATCCATAGTTGCCTGACTCCCCGTCGTGTAGATAACTACGATACGGGAGGGCTTACCATCTGGCCCCAGTGCTGCAATGATACCGCGAGACCCACGCTCACCGGCTCCAGATTTATCAGCAATAAACCAGCCAGCCGGAAGGGCCGAGCGCAGAAGTGGTCCTGCAACTTTATCCGCCTCCATCCAGTCTATTAATTGTTGCCGGGAAGC…		fig.3g
ISLde6 cleavage dsDNA substrate, CGG TAM	TCAGTGGAACGAAAACTCACGTTAAGGGATTTTGGTCATGAGATTATCAAAAAGGATCTTCACCTAGATCCTTTTAAATTAAAAATGAAGTTTTAAATCAATCTAAAGTATATATGAGTAAACTTGGTCTGACAGTTACCAATGCTTAATCAGTGAGGCACCTATCTCAGCGATCTGTCTATTTCGTTCATCCATAGTTGCCTGACTCCCCGTCGTGTAGATAACTACGATACGGGAGGGCTTACCATCTGGCCCCAGTGCTGCAATGATACCGCGAGACCCACGCTCACCGGCTCCAGATTTATCAGCAATAAACCAGCCAGCCGGAAGGGCCGAGCGCAGAAGTGGTCCTGCAACTTTATCCGCCTCCATCCAGTCTATTAATTGTTGCCGGGAAGC…		fig.3g
ISLde6 cleavage dsDNA substrate, GAA TAM	TCAGTGGAACGAAAACTCACGTTAAGGGATTTTGGTCATGAGATTATCAAAAAGGATCTTCACCTAGATCCTTTTAAATTAAAAATGAAGTTTTAAATCAATCTAAAGTATATATGAGTAAACTTGGTCTGACAGTTACCAATGCTTAATCAGTGAGGCACCTATCTCAGCGATCTGTCTATTTCGTTCATCCATAGTTGCCTGACTCCCCGTCGTGTAGATAACTACGATACGGGAGGGCTTACCATCTGGCCCCAGTGCTGCAATGATACCGCGAGACCCACGCTCACCGGCTCCAGATTTATCAGCAATAAACCAGCCAGCCGGAAGGGCCGAGCGCAGAAGTGGTCCTGCAACTTTATCCGCCTCCATCCAGTCTATTAATTGTTGCCGGGAAGC…		fig.3g
ISLde6 cleavage dsDNA substrate, GAT TAM	TCAGTGGAACGAAAACTCACGTTAAGGGATTTTGGTCATGAGATTATCAAAAAGGATCTTCACCTAGATCCTTTTAAATTAAAAATGAAGTTTTAAATCAATCTAAAGTATATATGAGTAAACTTGGTCTGACAGTTACCAATGCTTAATCAGTGAGGCACCTATCTCAGCGATCTGTCTATTTCGTTCATCCATAGTTGCCTGACTCCCCGTCGTGTAGATAACTACGATACGGGAGGGCTTACCATCTGGCCCCAGTGCTGCAATGATACCGCGAGACCCACGCTCACCGGCTCCAGATTTATCAGCAATAAACCAGCCAGCCGGAAGGGCCGAGCGCAGAAGTGGTCCTGCAACTTTATCCGCCTCCATCCAGTCTATTAATTGTTGCCGGGAAGC…		fig.3g
ISLde6 cleavage dsDNA substrate, GAC TAM	TCAGTGGAACGAAAACTCACGTTAAGGGATTTTGGTCATGAGATTATCAAAAAGGATCTTCACCTAGATCCTTTTAAATTAAAAATGAAGTTTTAAATCAATCTAAAGTATATATGAGTAAACTTGGTCTGACAGTTACCAATGCTTAATCAGTGAGGCACCTATCTCAGCGATCTGTCTATTTCGTTCATCCATAGTTGCCTGACTCCCCGTCGTGTAGATAACTACGATACGGGAGGGCTTACCATCTGGCCCCAGTGCTGCAATGATACCGCGAGACCCACGCTCACCGGCTCCAGATTTATCAGCAATAAACCAGCCAGCCGGAAGGGCCGAGCGCAGAAGTGGTCCTGCAACTTTATCCGCCTCCATCCAGTCTATTAATTGTTGCCGGGAAGC…		fig.3g
ISLde6 cleavage dsDNA substrate, GAG TAM	TCAGTGGAACGAAAACTCACGTTAAGGGATTTTGGTCATGAGATTATCAAAAAGGATCTTCACCTAGATCCTTTTAAATTAAAAATGAAGTTTTAAATCAATCTAAAGTATATATGAGTAAACTTGGTCTGACAGTTACCAATGCTTAATCAGTGAGGCACCTATCTCAGCGATCTGTCTATTTCGTTCATCCATAGTTGCCTGACTCCCCGTCGTGTAGATAACTACGATACGGGAGGGCTTACCATCTGGCCCCAGTGCTGCAATGATACCGCGAGACCCACGCTCACCGGCTCCAGATTTATCAGCAATAAACCAGCCAGCCGGAAGGGCCGAGCGCAGAAGTGGTCCTGCAACTTTATCCGCCTCCATCCAGTCTATTAATTGTTGCCGGGAAGC…		fig.3g
ISLde6 cleavage dsDNA substrate, GTA TAM	TCAGTGGAACGAAAACTCACGTTAAGGGATTTTGGTCATGAGATTATCAAAAAGGATCTTCACCTAGATCCTTTTAAATTAAAAATGAAGTTTTAAATCAATCTAAAGTATATATGAGTAAACTTGGTCTGACAGTTACCAATGCTTAATCAGTGAGGCACCTATCTCAGCGATCTGTCTATTTCGTTCATCCATAGTTGCCTGACTCCCCGTCGTGTAGATAACTACGATACGGGAGGGCTTACCATCTGGCCCCAGTGCTGCAATGATACCGCGAGACCCACGCTCACCGGCTCCAGATTTATCAGCAATAAACCAGCCAGCCGGAAGGGCCGAGCGCAGAAGTGGTCCTGCAACTTTATCCGCCTCCATCCAGTCTATTAATTGTTGCCGGGAAGC…		fig.3g
ISLde6 cleavage dsDNA substrate, GTT TAM	TCAGTGGAACGAAAACTCACGTTAAGGGATTTTGGTCATGAGATTATCAAAAAGGATCTTCACCTAGATCCTTTTAAATTAAAAATGAAGTTTTAAATCAATCTAAAGTATATATGAGTAAACTTGGTCTGACAGTTACCAATGCTTAATCAGTGAGGCACCTATCTCAGCGATCTGTCTATTTCGTTCATCCATAGTTGCCTGACTCCCCGTCGTGTAGATAACTACGATACGGGAGGGCTTACCATCTGGCCCCAGTGCTGCAATGATACCGCGAGACCCACGCTCACCGGCTCCAGATTTATCAGCAATAAACCAGCCAGCCGGAAGGGCCGAGCGCAGAAGTGGTCCTGCAACTTTATCCGCCTCCATCCAGTCTATTAATTGTTGCCGGGAAGC…		fig.3g
ISLde6 cleavage dsDNA substrate, GTC TAM	TCAGTGGAACGAAAACTCACGTTAAGGGATTTTGGTCATGAGATTATCAAAAAGGATCTTCACCTAGATCCTTTTAAATTAAAAATGAAGTTTTAAATCAATCTAAAGTATATATGAGTAAACTTGGTCTGACAGTTACCAATGCTTAATCAGTGAGGCACCTATCTCAGCGATCTGTCTATTTCGTTCATCCATAGTTGCCTGACTCCCCGTCGTGTAGATAACTACGATACGGGAGGGCTTACCATCTGGCCCCAGTGCTGCAATGATACCGCGAGACCCACGCTCACCGGCTCCAGATTTATCAGCAATAAACCAGCCAGCCGGAAGGGCCGAGCGCAGAAGTGGTCCTGCAACTTTATCCGCCTCCATCCAGTCTATTAATTGTTGCCGGGAAGC…		fig.3g
ISLde6 cleavage dsDNA substrate, GTG TAM	TCAGTGGAACGAAAACTCACGTTAAGGGATTTTGGTCATGAGATTATCAAAAAGGATCTTCACCTAGATCCTTTTAAATTAAAAATGAAGTTTTAAATCAATCTAAAGTATATATGAGTAAACTTGGTCTGACAGTTACCAATGCTTAATCAGTGAGGCACCTATCTCAGCGATCTGTCTATTTCGTTCATCCATAGTTGCCTGACTCCCCGTCGTGTAGATAACTACGATACGGGAGGGCTTACCATCTGGCCCCAGTGCTGCAATGATACCGCGAGACCCACGCTCACCGGCTCCAGATTTATCAGCAATAAACCAGCCAGCCGGAAGGGCCGAGCGCAGAAGTGGTCCTGCAACTTTATCCGCCTCCATCCAGTCTATTAATTGTTGCCGGGAAGC…		fig.3g
ISLde6 cleavage dsDNA substrate, GCA TAM	TCAGTGGAACGAAAACTCACGTTAAGGGATTTTGGTCATGAGATTATCAAAAAGGATCTTCACCTAGATCCTTTTAAATTAAAAATGAAGTTTTAAATCAATCTAAAGTATATATGAGTAAACTTGGTCTGACAGTTACCAATGCTTAATCAGTGAGGCACCTATCTCAGCGATCTGTCTATTTCGTTCATCCATAGTTGCCTGACTCCCCGTCGTGTAGATAACTACGATACGGGAGGGCTTACCATCTGGCCCCAGTGCTGCAATGATACCGCGAGACCCACGCTCACCGGCTCCAGATTTATCAGCAATAAACCAGCCAGCCGGAAGGGCCGAGCGCAGAAGTGGTCCTGCAACTTTATCCGCCTCCATCCAGTCTATTAATTGTTGCCGGGAAGC…		fig.3g
ISLde6 cleavage dsDNA substrate, GCT TAM	TCAGTGGAACGAAAACTCACGTTAAGGGATTTTGGTCATGAGATTATCAAAAAGGATCTTCACCTAGATCCTTTTAAATTAAAAATGAAGTTTTAAATCAATCTAAAGTATATATGAGTAAACTTGGTCTGACAGTTACCAATGCTTAATCAGTGAGGCACCTATCTCAGCGATCTGTCTATTTCGTTCATCCATAGTTGCCTGACTCCCCGTCGTGTAGATAACTACGATACGGGAGGGCTTACCATCTGGCCCCAGTGCTGCAATGATACCGCGAGACCCACGCTCACCGGCTCCAGATTTATCAGCAATAAACCAGCCAGCCGGAAGGGCCGAGCGCAGAAGTGGTCCTGCAACTTTATCCGCCTCCATCCAGTCTATTAATTGTTGCCGGGAAGC…		fig.3g
ISLde6 cleavage dsDNA substrate, GCC TAM	TCAGTGGAACGAAAACTCACGTTAAGGGATTTTGGTCATGAGATTATCAAAAAGGATCTTCACCTAGATCCTTTTAAATTAAAAATGAAGTTTTAAATCAATCTAAAGTATATATGAGTAAACTTGGTCTGACAGTTACCAATGCTTAATCAGTGAGGCACCTATCTCAGCGATCTGTCTATTTCGTTCATCCATAGTTGCCTGACTCCCCGTCGTGTAGATAACTACGATACGGGAGGGCTTACCATCTGGCCCCAGTGCTGCAATGATACCGCGAGACCCACGCTCACCGGCTCCAGATTTATCAGCAATAAACCAGCCAGCCGGAAGGGCCGAGCGCAGAAGTGGTCCTGCAACTTTATCCGCCTCCATCCAGTCTATTAATTGTTGCCGGGAAGC…		fig.3g
ISLde6 cleavage dsDNA substrate, GCG TAM	TCAGTGGAACGAAAACTCACGTTAAGGGATTTTGGTCATGAGATTATCAAAAAGGATCTTCACCTAGATCCTTTTAAATTAAAAATGAAGTTTTAAATCAATCTAAAGTATATATGAGTAAACTTGGTCTGACAGTTACCAATGCTTAATCAGTGAGGCACCTATCTCAGCGATCTGTCTATTTCGTTCATCCATAGTTGCCTGACTCCCCGTCGTGTAGATAACTACGATACGGGAGGGCTTACCATCTGGCCCCAGTGCTGCAATGATACCGCGAGACCCACGCTCACCGGCTCCAGATTTATCAGCAATAAACCAGCCAGCCGGAAGGGCCGAGCGCAGAAGTGGTCCTGCAACTTTATCCGCCTCCATCCAGTCTATTAATTGTTGCCGGGAAGC…		fig.3g
ISLde6 cleavage dsDNA substrate, GGA TAM	TCAGTGGAACGAAAACTCACGTTAAGGGATTTTGGTCATGAGATTATCAAAAAGGATCTTCACCTAGATCCTTTTAAATTAAAAATGAAGTTTTAAATCAATCTAAAGTATATATGAGTAAACTTGGTCTGACAGTTACCAATGCTTAATCAGTGAGGCACCTATCTCAGCGATCTGTCTATTTCGTTCATCCATAGTTGCCTGACTCCCCGTCGTGTAGATAACTACGATACGGGAGGGCTTACCATCTGGCCCCAGTGCTGCAATGATACCGCGAGACCCACGCTCACCGGCTCCAGATTTATCAGCAATAAACCAGCCAGCCGGAAGGGCCGAGCGCAGAAGTGGTCCTGCAACTTTATCCGCCTCCATCCAGTCTATTAATTGTTGCCGGGAAGC…		fig.3g
ISLde6 cleavage dsDNA substrate, GGT TAM	TCAGTGGAACGAAAACTCACGTTAAGGGATTTTGGTCATGAGATTATCAAAAAGGATCTTCACCTAGATCCTTTTAAATTAAAAATGAAGTTTTAAATCAATCTAAAGTATATATGAGTAAACTTGGTCTGACAGTTACCAATGCTTAATCAGTGAGGCACCTATCTCAGCGATCTGTCTATTTCGTTCATCCATAGTTGCCTGACTCCCCGTCGTGTAGATAACTACGATACGGGAGGGCTTACCATCTGGCCCCAGTGCTGCAATGATACCGCGAGACCCACGCTCACCGGCTCCAGATTTATCAGCAATAAACCAGCCAGCCGGAAGGGCCGAGCGCAGAAGTGGTCCTGCAACTTTATCCGCCTCCATCCAGTCTATTAATTGTTGCCGGGAAGC…		fig.3g
ISLde6 cleavage dsDNA substrate, GGC TAM	TCAGTGGAACGAAAACTCACGTTAAGGGATTTTGGTCATGAGATTATCAAAAAGGATCTTCACCTAGATCCTTTTAAATTAAAAATGAAGTTTTAAATCAATCTAAAGTATATATGAGTAAACTTGGTCTGACAGTTACCAATGCTTAATCAGTGAGGCACCTATCTCAGCGATCTGTCTATTTCGTTCATCCATAGTTGCCTGACTCCCCGTCGTGTAGATAACTACGATACGGGAGGGCTTACCATCTGGCCCCAGTGCTGCAATGATACCGCGAGACCCACGCTCACCGGCTCCAGATTTATCAGCAATAAACCAGCCAGCCGGAAGGGCCGAGCGCAGAAGTGGTCCTGCAACTTTATCCGCCTCCATCCAGTCTATTAATTGTTGCCGGGAAGC…		fig.3g
ISLde6 cleavage dsDNA substrate, GGG TAM	TCAGTGGAACGAAAACTCACGTTAAGGGATTTTGGTCATGAGATTATCAAAAAGGATCTTCACCTAGATCCTTTTAAATTAAAAATGAAGTTTTAAATCAATCTAAAGTATATATGAGTAAACTTGGTCTGACAGTTACCAATGCTTAATCAGTGAGGCACCTATCTCAGCGATCTGTCTATTTCGTTCATCCATAGTTGCCTGACTCCCCGTCGTGTAGATAACTACGATACGGGAGGGCTTACCATCTGGCCCCAGTGCTGCAATGATACCGCGAGACCCACGCTCACCGGCTCCAGATTTATCAGCAATAAACCAGCCAGCCGGAAGGGCCGAGCGCAGAAGTGGTCCTGCAACTTTATCCGCCTCCATCCAGTCTATTAATTGTTGCCGGGAAGC…		fig.3g
Genome interference plasmids for L. reuteri 03	plasmid description	guide sequence(5'→3')
pMG36e2-ISLde6-lacZ-T3-10nt	ISLde6-mediated lacZ interference plasmid for L. reuteri 03, targeting lacZ, with guide length of 10nt	TATCAGCAAT	fig.3e
pMG36e2-ISLde6-lacZ-T3-12nt	ISLde6-mediated lacZ interference plasmid for L. reuteri 03, targeting lacZ, with guide length of 12nt	TATCAGCAATGG	fig.3e
pMG36e2-ISLde6-lacZ-T3-14nt	ISLde6-mediated lacZ interference plasmid for L. reuteri 03, targeting lacZ, with guide length of 14nt	TATCAGCAATGGGC	fig.3e
pMG36e2-ISLde6-lacZ-T3-16nt	ISLde6-mediated lacZ interference plasmid for L. reuteri 03, targeting lacZ, with guide length of 16nt	TATCAGCAATGGGCTA	fig.3e
pMG36e2-ISLde6-lacZ-T3-18nt	ISLde6-mediated lacZ interference plasmid for L. reuteri 03, targeting lacZ, with guide length of 18nt	TATCAGCAATGGGCTAGT	fig.3e
pMG36e2-ISLde6-lacZ-T3-20nt	ISLde6-mediated lacZ interference plasmid for L. reuteri 03, targeting lacZ, with guide length of 20nt	TATCAGCAATGGGCTAGTGC	fig.3e
pMG36e2-ISLde6-lacZ-T3-22nt	ISLde6-mediated lacZ interference plasmid for L. reuteri 03, targeting lacZ, with guide length of 22nt	TATCAGCAATGGGCTAGTGCGC	fig.3e
pMG36e2-ISLde6-lacZ-T3-24nt	ISLde6-mediated lacZ interference plasmid for L. reuteri 03, targeting lacZ, with guide length of 24nt	TATCAGCAATGGGCTAGTGCGCAA	fig.3e
pMG36e2-ISLde6-lacZ-T3-26nt	ISLde6-mediated lacZ interference plasmid for L. reuteri 03, targeting lacZ, with guide length of 26nt	TATCAGCAATGGGCTAGTGCGCAAGA	fig.3e
pMG36e2-ISLde6-lacZ-T3-28nt	ISLde6-mediated lacZ interference plasmid for L. reuteri 03, targeting lacZ, with guide length of 28nt	TATCAGCAATGGGCTAGTGCGCAAGACA	fig.3e
pMG36e2-ISLde6-lacZ-T3-30nt	ISLde6-mediated lacZ interference plasmid for L. reuteri 03, targeting lacZ, with guide length of 30nt	TATCAGCAATGGGCTAGTGCGCAAGACATC	fig.3e
pMG36e2-ISLam-lacZ-T4-10nt	ISLam-mediated lacZ interference plasmid for L. reuteri 03, targeting lacZ, with guide length of 10nt	TGGTCCAGGA	fig.3e
pMG36e2-ISLam-lacZ-T4-12nt	ISLam-mediated lacZ interference plasmid for L. reuteri 03, targeting lacZ, with guide length of 12nt	TGGTCCAGGATA	fig.3e
pMG36e2-ISLam-lacZ-T4-14nt	ISLam-mediated lacZ interference plasmid for L. reuteri 03, targeting lacZ, with guide length of 14nt	TGGTCCAGGATAAC	fig.3e
pMG36e2-ISLam-lacZ-T4-16nt	ISLam-mediated lacZ interference plasmid for L. reuteri 03, targeting lacZ, with guide length of 16nt	TGGTCCAGGATAACCG	fig.3e
pMG36e2-ISLam-lacZ-T4-18nt	ISLam-mediated lacZ interference plasmid for L. reuteri 03, targeting lacZ, with guide length of 18nt	TGGTCCAGGATAACCGCC	fig.3e
pMG36e2-ISLam-lacZ-T4-20nt	ISLam-mediated lacZ interference plasmid for L. reuteri 03, targeting lacZ, with guide length of 20nt	TGGTCCAGGATAACCGCCTG	fig.3e
pMG36e2-ISLam-lacZ-T4-22nt	ISLam-mediated lacZ interference plasmid for L. reuteri 03, targeting lacZ, with guide length of 22nt	TGGTCCAGGATAACCGCCTGGA	fig.3e
pMG36e2-ISLam-lacZ-T4-24nt	ISLam-mediated lacZ interference plasmid for L. reuteri 03, targeting lacZ, with guide length of 24nt	TGGTCCAGGATAACCGCCTGGATA	fig.3e
pMG36e2-ISLam-lacZ-T4-26nt	ISLam-mediated lacZ interference plasmid for L. reuteri 03, targeting lacZ, with guide length of 26nt	TGGTCCAGGATAACCGCCTGGATAAA	fig.3e
pMG36e2-ISLam-lacZ-T4-28nt	ISLam-mediated lacZ interference plasmid for L. reuteri 03, targeting lacZ, with guide length of 28nt	TGGTCCAGGATAACCGCCTGGATAAATA	fig.3e
pMG36e2-ISLam-lacZ-T4-30nt	ISLam-mediated lacZ interference plasmid for L. reuteri 03, targeting lacZ, with guide length of 30nt	TGGTCCAGGATAACCGCCTGGATAAATATT	fig.3e
Protein expression plasmids	plasmid description	guide sequence(5'→3')
pET30a-ISLde6-ωRNA-T	ISLde6-10His protein and ISLde6-ωRNA expression plasmid	GATGAATATTAAGGACAATC
pET30a-ISLam-ωRNA-T	ISLam-14His protein and ISLam-ωRNA expression plasmid	GATGAATATTAAGGACAATC
plasmid	description	protein sequence	ωRNA sequence(5'-3')	guide sequence(5'→3')	figure
pET30a-ωRNA-ISLde6-10His	Plasmid for ISLde6-10His protein-RNP complex expression	MVSNEEKYGFTRQYHVLLTDKQKIQHEKALKTQNALFQYALKYLFKTYGVKHIGRPMPFSQKPIQYVLNKIKTGFIKDKYGLARWKKSVLFLSSHSADEFLKTVYTNFSQYRKRLVKADKSMDEKARYNFKMNVTKDKYGKHKNQLHKSWYRKGSINFLRNGASFRTITSQKLPEDSKGGIRIEDKHTDNHTFLTVADFGTVEVIEDLSELNLKDIALTKIKKLPDGSYRLQLTFSLPRKKQKSKTIQGFDWNMAGNEAFCSSDGKRIKVSDAAIKRADEYEQKINAIKSARDLEGNAHGQSKLYRKLDRRQQKLNAKRSNMLTNEYRHLVHEVVDDCDTIVVEKLDAYEMRKRGKGSAQRKGINRRLAVLKPYELMTILESLVKKQNKRFVKVDSFWT…	GGCGAAACGGAACAATCGTCCTTAGCACTAGACGGTGTTATCTGCGTAATCTTCTGAGCGAGTCAAAACGAAGACGAGATGACATTGGGCAGTTGTGAAACTAACCTAAACACTCTGAGTACTTCTAAGAGTTGTCGATCTTACGTGTAATGTGTTGGGTGGCCCCCAGATTCCTGCGACTTTAGTCGTAGGAGGTTCAA	GATGAATATTAAGGACAATC	fig. 3a
pET30a-ωRNA-ISLam-14His	Plasmid for ISLam-14His protein-RNP complex expression	MKRMSSLAYHFGVKLRFYPSSKQKKIIKLNYDAQRFVYNSYVGRNRSNYHAKHYLAVRQYQAMPFAFSILNNYETRLAEEVVTNSELLDKPRNIRDTYSFLRVKEIDSLAIANAIQNYQKAWNNYRKIGHGIPTFHKKRSDWSYQTNCQYPKQSEAYLDNGTARFIDAKHIKLPKLGIVRIAGFRKLIKERLLKQIPTRIGTVTIKKTADDQFYLSMQLGSDTAFVKELPKTQSQIGIDLNLDNFLTASNGAMVANPRFYRKTKKKLAHAQRVLSRRQRRAKKEGRNLRTAKNYQKQRLSVARLHDKIRRQREDFLQVLSTALIKNHDLVVAEELRNRNLLKNHALSQSISDVGWRSFLNMLAYKADLYGKEFLTIDPKYTTQRCHACGSIMGQNGYKK…	AAAGGCTGCAGTCCGTTAGCAACTTGCGGACTTAAAAGGCTTTGGTAATTAGACGACCTCTATCGGCAATAGTCAAAAGACTATTGCTGGTAAGTCAAGTCCGTATCTAAGCAAGTTGGTGTTCTGGTTAGCGCAAGCTAACGAGCCACTAAGCCCTAGACTTCAGTCTAGGGTAGTTGAC	GATGAATATTAAGGACAATC	fig. 3b

## Sheet: fig.4
fig.4
Plasmids	description	guide sequecne(5'→3')	protein sequence	figure
pSMC-ISLde6-T4	Wild-type ISLde6-mediated knockout plasmid for the ADE2 gene in S. cerevisiae S288C, using the guide ADE2-4	GCTTGCGTCACTTCTCAATT	MPPKKKRKVVSNEEKYGFTRQYHVLLTDKQKIQHEKALKTQNALFQYALKYLFKTYGVKHIGRPMPFSQKPIQYVLNKIKTGFIKDKYGLARWKKSVLFLSSHSADEFLKTVYTNFSQYRKRLVKADKSMDEKARYNFKMNVTKDKYGKHKNQLHKSWYRKGSINFLRNGASFRTITSQKLPEDSKGGIRIEDKHTDNHTFLTVADFGTVEVIEDLSELNLKDIALTKIKKLPDGSYRLQLTFSLPRKKQKSKTIQGFDWNMAGNEAFCSSDGKRIKVSDAAIKRADEYEQKINAIKSARDLEGNAHGQSKLYRKLDRRQQKLNAKRSNMLTNEYRHLVHEVVDDCDTIVVEKLDAYEMRKRGKGSAQRKGINRRLAVLKPYELMTILESLVKKQNKRF…	fig.4c
pSMC-N4Y-T4	ISLde6-N4Y mediated knockout plasmid for the ADE2 gene in S. cerevisiae S288C, using the guide ADE2-4	GCTTGCGTCACTTCTCAATT	MPPKKKRKVVSYEEKYGFTRQYHVLLTDKQKIQHEKALKTQNALFQYALKYLFKTYGVKHIGRPMPFSQKPIQYVLNKIKTGFIKDKYGLARWKKSVLFLSSHSADEFLKTVYTNFSQYRKRLVKADKSMDEKARYNFKMNVTKDKYGKHKNQLHKSWYRKGSINFLRNGASFRTITSQKLPEDSKGGIRIEDKHTDNHTFLTVADFGTVEVIEDLSELNLKDIALTKIKKLPDGSYRLQLTFSLPRKKQKSKTIQGFDWNMAGNEAFCSSDGKRIKVSDAAIKRADEYEQKINAIKSARDLEGNAHGQSKLYRKLDRRQQKLNAKRSNMLTNEYRHLVHEVVDDCDTIVVEKLDAYEMRKRGKGSAQRKGINRRLAVLKPYELMTILESLVKKQNKRF…	fig.4c
pSMC-G9F-T4	ISLde6-G9F mediated knockout plasmid for the ADE2 gene in S. cerevisiae S288C, using the guide ADE2-4	GCTTGCGTCACTTCTCAATT	MPPKKKRKVVSNEEKYFFTRQYHVLLTDKQKIQHEKALKTQNALFQYALKYLFKTYGVKHIGRPMPFSQKPIQYVLNKIKTGFIKDKYGLARWKKSVLFLSSHSADEFLKTVYTNFSQYRKRLVKADKSMDEKARYNFKMNVTKDKYGKHKNQLHKSWYRKGSINFLRNGASFRTITSQKLPEDSKGGIRIEDKHTDNHTFLTVADFGTVEVIEDLSELNLKDIALTKIKKLPDGSYRLQLTFSLPRKKQKSKTIQGFDWNMAGNEAFCSSDGKRIKVSDAAIKRADEYEQKINAIKSARDLEGNAHGQSKLYRKLDRRQQKLNAKRSNMLTNEYRHLVHEVVDDCDTIVVEKLDAYEMRKRGKGSAQRKGINRRLAVLKPYELMTILESLVKKQNKRF…	fig.4c
pSMC-K62E-T4	ISLde6-K62E mediated knockout plasmid for the ADE2 gene in S. cerevisiae S288C, using the guide ADE2-4	GCTTGCGTCACTTCTCAATT	MPPKKKRKVVSNEEKYGFTRQYHVLLTDKQKIQHEKALKTQNALFQYALKYLFKTYGVKHIGRPMPFSQEPIQYVLNKIKTGFIKDKYGLARWKKSVLFLSSHSADEFLKTVYTNFSQYRKRLVKADKSMDEKARYNFKMNVTKDKYGKHKNQLHKSWYRKGSINFLRNGASFRTITSQKLPEDSKGGIRIEDKHTDNHTFLTVADFGTVEVIEDLSELNLKDIALTKIKKLPDGSYRLQLTFSLPRKKQKSKTIQGFDWNMAGNEAFCSSDGKRIKVSDAAIKRADEYEQKINAIKSARDLEGNAHGQSKLYRKLDRRQQKLNAKRSNMLTNEYRHLVHEVVDDCDTIVVEKLDAYEMRKRGKGSAQRKGINRRLAVLKPYELMTILESLVKKQNKRF…	fig.4c
pSMC-K62R-T4	ISLde6-K62R mediated knockout plasmid for the ADE2 gene in S. cerevisiae S288C, using the guide ADE2-4	GCTTGCGTCACTTCTCAATT	MPPKKKRKVVSNEEKYGFTRQYHVLLTDKQKIQHEKALKTQNALFQYALKYLFKTYGVKHIGRPMPFSQRPIQYVLNKIKTGFIKDKYGLARWKKSVLFLSSHSADEFLKTVYTNFSQYRKRLVKADKSMDEKARYNFKMNVTKDKYGKHKNQLHKSWYRKGSINFLRNGASFRTITSQKLPEDSKGGIRIEDKHTDNHTFLTVADFGTVEVIEDLSELNLKDIALTKIKKLPDGSYRLQLTFSLPRKKQKSKTIQGFDWNMAGNEAFCSSDGKRIKVSDAAIKRADEYEQKINAIKSARDLEGNAHGQSKLYRKLDRRQQKLNAKRSNMLTNEYRHLVHEVVDDCDTIVVEKLDAYEMRKRGKGSAQRKGINRRLAVLKPYELMTILESLVKKQNKRF…	fig.4c
pSMC-Y66R-T4	ISLde6-Y66R mediated knockout plasmid for the ADE2 gene in S. cerevisiae S288C, using the guide ADE2-4	GCTTGCGTCACTTCTCAATT	MPPKKKRKVVSNEEKYGFTRQYHVLLTDKQKIQHEKALKTQNALFQYALKYLFKTYGVKHIGRPMPFSQKPIQRVLNKIKTGFIKDKYGLARWKKSVLFLSSHSADEFLKTVYTNFSQYRKRLVKADKSMDEKARYNFKMNVTKDKYGKHKNQLHKSWYRKGSINFLRNGASFRTITSQKLPEDSKGGIRIEDKHTDNHTFLTVADFGTVEVIEDLSELNLKDIALTKIKKLPDGSYRLQLTFSLPRKKQKSKTIQGFDWNMAGNEAFCSSDGKRIKVSDAAIKRADEYEQKINAIKSARDLEGNAHGQSKLYRKLDRRQQKLNAKRSNMLTNEYRHLVHEVVDDCDTIVVEKLDAYEMRKRGKGSAQRKGINRRLAVLKPYELMTILESLVKKQNKRF…	fig.4c
pSMC-L68R-T4	ISLde6-T68R mediated knockout plasmid for the ADE2 gene in S. cerevisiae S288C, using the guide ADE2-4	GCTTGCGTCACTTCTCAATT	MPPKKKRKVVSNEEKYGFTRQYHVLLTDKQKIQHEKALKTQNALFQYALKYLFKTYGVKHIGRPMPFSQKPIQYVRNKIKTGFIKDKYGLARWKKSVLFLSSHSADEFLKTVYTNFSQYRKRLVKADKSMDEKARYNFKMNVTKDKYGKHKNQLHKSWYRKGSINFLRNGASFRTITSQKLPEDSKGGIRIEDKHTDNHTFLTVADFGTVEVIEDLSELNLKDIALTKIKKLPDGSYRLQLTFSLPRKKQKSKTIQGFDWNMAGNEAFCSSDGKRIKVSDAAIKRADEYEQKINAIKSARDLEGNAHGQSKLYRKLDRRQQKLNAKRSNMLTNEYRHLVHEVVDDCDTIVVEKLDAYEMRKRGKGSAQRKGINRRLAVLKPYELMTILESLVKKQNKRF…	fig.4c
pSMC-N69D-T4	ISLde6-N69D mediated knockout plasmid for the ADE2 gene in S. cerevisiae S288C, using the guide ADE2-4	GCTTGCGTCACTTCTCAATT	MPPKKKRKVVSNEEKYGFTRQYHVLLTDKQKIQHEKALKTQNALFQYALKYLFKTYGVKHIGRPMPFSQKPIQYVLDKIKTGFIKDKYGLARWKKSVLFLSSHSADEFLKTVYTNFSQYRKRLVKADKSMDEKARYNFKMNVTKDKYGKHKNQLHKSWYRKGSINFLRNGASFRTITSQKLPEDSKGGIRIEDKHTDNHTFLTVADFGTVEVIEDLSELNLKDIALTKIKKLPDGSYRLQLTFSLPRKKQKSKTIQGFDWNMAGNEAFCSSDGKRIKVSDAAIKRADEYEQKINAIKSARDLEGNAHGQSKLYRKLDRRQQKLNAKRSNMLTNEYRHLVHEVVDDCDTIVVEKLDAYEMRKRGKGSAQRKGINRRLAVLKPYELMTILESLVKKQNKRF…	fig.4c
pSMC-N69R-T4	ISLde6-N69R mediated knockout plasmid for the ADE2 gene in S. cerevisiae S288C, using the guide ADE2-4	GCTTGCGTCACTTCTCAATT	MPPKKKRKVVSNEEKYGFTRQYHVLLTDKQKIQHEKALKTQNALFQYALKYLFKTYGVKHIGRPMPFSQKPIQYVLRKIKTGFIKDKYGLARWKKSVLFLSSHSADEFLKTVYTNFSQYRKRLVKADKSMDEKARYNFKMNVTKDKYGKHKNQLHKSWYRKGSINFLRNGASFRTITSQKLPEDSKGGIRIEDKHTDNHTFLTVADFGTVEVIEDLSELNLKDIALTKIKKLPDGSYRLQLTFSLPRKKQKSKTIQGFDWNMAGNEAFCSSDGKRIKVSDAAIKRADEYEQKINAIKSARDLEGNAHGQSKLYRKLDRRQQKLNAKRSNMLTNEYRHLVHEVVDDCDTIVVEKLDAYEMRKRGKGSAQRKGINRRLAVLKPYELMTILESLVKKQNKRF…	fig.4c
pSMC-K70R-T4	ISLde6-K70R mediated knockout plasmid for the ADE2 gene in S. cerevisiae S288C, using the guide ADE2-4	GCTTGCGTCACTTCTCAATT	MPPKKKRKVVSNEEKYGFTRQYHVLLTDKQKIQHEKALKTQNALFQYALKYLFKTYGVKHIGRPMPFSQKPIQYVLNRIKTGFIKDKYGLARWKKSVLFLSSHSADEFLKTVYTNFSQYRKRLVKADKSMDEKARYNFKMNVTKDKYGKHKNQLHKSWYRKGSINFLRNGASFRTITSQKLPEDSKGGIRIEDKHTDNHTFLTVADFGTVEVIEDLSELNLKDIALTKIKKLPDGSYRLQLTFSLPRKKQKSKTIQGFDWNMAGNEAFCSSDGKRIKVSDAAIKRADEYEQKINAIKSARDLEGNAHGQSKLYRKLDRRQQKLNAKRSNMLTNEYRHLVHEVVDDCDTIVVEKLDAYEMRKRGKGSAQRKGINRRLAVLKPYELMTILESLVKKQNKRF…	fig.4c
pSMC-I71R-T4	ISLde6-I71R mediated knockout plasmid for the ADE2 gene in S. cerevisiae S288C, using the guide ADE2-4	GCTTGCGTCACTTCTCAATT	MPPKKKRKVVSNEEKYGFTRQYHVLLTDKQKIQHEKALKTQNALFQYALKYLFKTYGVKHIGRPMPFSQKPIQYVLNKRKTGFIKDKYGLARWKKSVLFLSSHSADEFLKTVYTNFSQYRKRLVKADKSMDEKARYNFKMNVTKDKYGKHKNQLHKSWYRKGSINFLRNGASFRTITSQKLPEDSKGGIRIEDKHTDNHTFLTVADFGTVEVIEDLSELNLKDIALTKIKKLPDGSYRLQLTFSLPRKKQKSKTIQGFDWNMAGNEAFCSSDGKRIKVSDAAIKRADEYEQKINAIKSARDLEGNAHGQSKLYRKLDRRQQKLNAKRSNMLTNEYRHLVHEVVDDCDTIVVEKLDAYEMRKRGKGSAQRKGINRRLAVLKPYELMTILESLVKKQNKRF…	fig.4c
pSMC-T73R-T4	ISLde6-T73R mediated knockout plasmid for the ADE2 gene in S. cerevisiae S288C, using the guide ADE2-4	GCTTGCGTCACTTCTCAATT	MPPKKKRKVVSNEEKYGFTRQYHVLLTDKQKIQHEKALKTQNALFQYALKYLFKTYGVKHIGRPMPFSQKPIQYVLNKIKRGFIKDKYGLARWKKSVLFLSSHSADEFLKTVYTNFSQYRKRLVKADKSMDEKARYNFKMNVTKDKYGKHKNQLHKSWYRKGSINFLRNGASFRTITSQKLPEDSKGGIRIEDKHTDNHTFLTVADFGTVEVIEDLSELNLKDIALTKIKKLPDGSYRLQLTFSLPRKKQKSKTIQGFDWNMAGNEAFCSSDGKRIKVSDAAIKRADEYEQKINAIKSARDLEGNAHGQSKLYRKLDRRQQKLNAKRSNMLTNEYRHLVHEVVDDCDTIVVEKLDAYEMRKRGKGSAQRKGINRRLAVLKPYELMTILESLVKKQNKRF…	fig.4c
pSMC-G74R-T4	ISLde6-G74R mediated knockout plasmid for the ADE2 gene in S. cerevisiae S288C, using the guide ADE2-4	GCTTGCGTCACTTCTCAATT	MPPKKKRKVVSNEEKYGFTRQYHVLLTDKQKIQHEKALKTQNALFQYALKYLFKTYGVKHIGRPMPFSQKPIQYVLNKIKTRFIKDKYGLARWKKSVLFLSSHSADEFLKTVYTNFSQYRKRLVKADKSMDEKARYNFKMNVTKDKYGKHKNQLHKSWYRKGSINFLRNGASFRTITSQKLPEDSKGGIRIEDKHTDNHTFLTVADFGTVEVIEDLSELNLKDIALTKIKKLPDGSYRLQLTFSLPRKKQKSKTIQGFDWNMAGNEAFCSSDGKRIKVSDAAIKRADEYEQKINAIKSARDLEGNAHGQSKLYRKLDRRQQKLNAKRSNMLTNEYRHLVHEVVDDCDTIVVEKLDAYEMRKRGKGSAQRKGINRRLAVLKPYELMTILESLVKKQNKRF…	fig.4c
pSMC-F75R-T4	ISLde6-F75R mediated knockout plasmid for the ADE2 gene in S. cerevisiae S288C, using the guide ADE2-4	GCTTGCGTCACTTCTCAATT	MPPKKKRKVVSNEEKYGFTRQYHVLLTDKQKIQHEKALKTQNALFQYALKYLFKTYGVKHIGRPMPFSQKPIQYVLNKIKTGRIKDKYGLARWKKSVLFLSSHSADEFLKTVYTNFSQYRKRLVKADKSMDEKARYNFKMNVTKDKYGKHKNQLHKSWYRKGSINFLRNGASFRTITSQKLPEDSKGGIRIEDKHTDNHTFLTVADFGTVEVIEDLSELNLKDIALTKIKKLPDGSYRLQLTFSLPRKKQKSKTIQGFDWNMAGNEAFCSSDGKRIKVSDAAIKRADEYEQKINAIKSARDLEGNAHGQSKLYRKLDRRQQKLNAKRSNMLTNEYRHLVHEVVDDCDTIVVEKLDAYEMRKRGKGSAQRKGINRRLAVLKPYELMTILESLVKKQNKRF…	fig.4c
pSMC-D78R-T4	ISLde6-D78R mediated knockout plasmid for the ADE2 gene in S. cerevisiae S288C, using the guide ADE2-4	GCTTGCGTCACTTCTCAATT	MPPKKKRKVVSNEEKYGFTRQYHVLLTDKQKIQHEKALKTQNALFQYALKYLFKTYGVKHIGRPMPFSQKPIQYVLNKIKTGFIKRKYGLARWKKSVLFLSSHSADEFLKTVYTNFSQYRKRLVKADKSMDEKARYNFKMNVTKDKYGKHKNQLHKSWYRKGSINFLRNGASFRTITSQKLPEDSKGGIRIEDKHTDNHTFLTVADFGTVEVIEDLSELNLKDIALTKIKKLPDGSYRLQLTFSLPRKKQKSKTIQGFDWNMAGNEAFCSSDGKRIKVSDAAIKRADEYEQKINAIKSARDLEGNAHGQSKLYRKLDRRQQKLNAKRSNMLTNEYRHLVHEVVDDCDTIVVEKLDAYEMRKRGKGSAQRKGINRRLAVLKPYELMTILESLVKKQNKRF…	fig.4c
pSMC-S94E-T4	ISLde6-S94E mediated knockout plasmid for the ADE2 gene in S. cerevisiae S288C, using the guide ADE2-4	GCTTGCGTCACTTCTCAATT	MPPKKKRKVVSNEEKYGFTRQYHVLLTDKQKIQHEKALKTQNALFQYALKYLFKTYGVKHIGRPMPFSQKPIQYVLNKIKTGFIKDKYGLARWKKSVLFLSEHSADEFLKTVYTNFSQYRKRLVKADKSMDEKARYNFKMNVTKDKYGKHKNQLHKSWYRKGSINFLRNGASFRTITSQKLPEDSKGGIRIEDKHTDNHTFLTVADFGTVEVIEDLSELNLKDIALTKIKKLPDGSYRLQLTFSLPRKKQKSKTIQGFDWNMAGNEAFCSSDGKRIKVSDAAIKRADEYEQKINAIKSARDLEGNAHGQSKLYRKLDRRQQKLNAKRSNMLTNEYRHLVHEVVDDCDTIVVEKLDAYEMRKRGKGSAQRKGINRRLAVLKPYELMTILESLVKKQNKRF…	fig.4c
pSMC-S94R-T4	ISLde6-S94R mediated knockout plasmid for the ADE2 gene in S. cerevisiae S288C, using the guide ADE2-4	GCTTGCGTCACTTCTCAATT	MPPKKKRKVVSNEEKYGFTRQYHVLLTDKQKIQHEKALKTQNALFQYALKYLFKTYGVKHIGRPMPFSQKPIQYVLNKIKTGFIKDKYGLARWKKSVLFLSRHSADEFLKTVYTNFSQYRKRLVKADKSMDEKARYNFKMNVTKDKYGKHKNQLHKSWYRKGSINFLRNGASFRTITSQKLPEDSKGGIRIEDKHTDNHTFLTVADFGTVEVIEDLSELNLKDIALTKIKKLPDGSYRLQLTFSLPRKKQKSKTIQGFDWNMAGNEAFCSSDGKRIKVSDAAIKRADEYEQKINAIKSARDLEGNAHGQSKLYRKLDRRQQKLNAKRSNMLTNEYRHLVHEVVDDCDTIVVEKLDAYEMRKRGKGSAQRKGINRRLAVLKPYELMTILESLVKKQNKRF…	fig.4c
pSMC-H95E-T4	ISLde6-H95E mediated knockout plasmid for the ADE2 gene in S. cerevisiae S288C, using the guide ADE2-4	GCTTGCGTCACTTCTCAATT	MPPKKKRKVVSNEEKYGFTRQYHVLLTDKQKIQHEKALKTQNALFQYALKYLFKTYGVKHIGRPMPFSQKPIQYVLNKIKTGFIKDKYGLARWKKSVLFLSSESADEFLKTVYTNFSQYRKRLVKADKSMDEKARYNFKMNVTKDKYGKHKNQLHKSWYRKGSINFLRNGASFRTITSQKLPEDSKGGIRIEDKHTDNHTFLTVADFGTVEVIEDLSELNLKDIALTKIKKLPDGSYRLQLTFSLPRKKQKSKTIQGFDWNMAGNEAFCSSDGKRIKVSDAAIKRADEYEQKINAIKSARDLEGNAHGQSKLYRKLDRRQQKLNAKRSNMLTNEYRHLVHEVVDDCDTIVVEKLDAYEMRKRGKGSAQRKGINRRLAVLKPYELMTILESLVKKQNKRF…	fig.4c
pSMC-T106K-T4	ISLde6-T106K mediated knockout plasmid for the ADE2 gene in S. cerevisiae S288C, using the guide ADE2-4	GCTTGCGTCACTTCTCAATT	MPPKKKRKVVSNEEKYGFTRQYHVLLTDKQKIQHEKALKTQNALFQYALKYLFKTYGVKHIGRPMPFSQKPIQYVLNKIKTGFIKDKYGLARWKKSVLFLSSHSADEFLKTVYKNFSQYRKRLVKADKSMDEKARYNFKMNVTKDKYGKHKNQLHKSWYRKGSINFLRNGASFRTITSQKLPEDSKGGIRIEDKHTDNHTFLTVADFGTVEVIEDLSELNLKDIALTKIKKLPDGSYRLQLTFSLPRKKQKSKTIQGFDWNMAGNEAFCSSDGKRIKVSDAAIKRADEYEQKINAIKSARDLEGNAHGQSKLYRKLDRRQQKLNAKRSNMLTNEYRHLVHEVVDDCDTIVVEKLDAYEMRKRGKGSAQRKGINRRLAVLKPYELMTILESLVKKQNKRF…	fig.4c
pSMC-T106E-T4	ISLde6-T106E mediated knockout plasmid for the ADE2 gene in S. cerevisiae S288C, using the guide ADE2-4	GCTTGCGTCACTTCTCAATT	MPPKKKRKVVSNEEKYGFTRQYHVLLTDKQKIQHEKALKTQNALFQYALKYLFKTYGVKHIGRPMPFSQKPIQYVLNKIKTGFIKDKYGLARWKKSVLFLSSHSADEFLKTVYENFSQYRKRLVKADKSMDEKARYNFKMNVTKDKYGKHKNQLHKSWYRKGSINFLRNGASFRTITSQKLPEDSKGGIRIEDKHTDNHTFLTVADFGTVEVIEDLSELNLKDIALTKIKKLPDGSYRLQLTFSLPRKKQKSKTIQGFDWNMAGNEAFCSSDGKRIKVSDAAIKRADEYEQKINAIKSARDLEGNAHGQSKLYRKLDRRQQKLNAKRSNMLTNEYRHLVHEVVDDCDTIVVEKLDAYEMRKRGKGSAQRKGINRRLAVLKPYELMTILESLVKKQNKRF…	fig.4c
pSMC-T106N-T4	ISLde6-T106N mediated knockout plasmid for the ADE2 gene in S. cerevisiae S288C, using the guide ADE2-4	GCTTGCGTCACTTCTCAATT	MPPKKKRKVVSNEEKYGFTRQYHVLLTDKQKIQHEKALKTQNALFQYALKYLFKTYGVKHIGRPMPFSQKPIQYVLNKIKTGFIKDKYGLARWKKSVLFLSSHSADEFLKTVYNNFSQYRKRLVKADKSMDEKARYNFKMNVTKDKYGKHKNQLHKSWYRKGSINFLRNGASFRTITSQKLPEDSKGGIRIEDKHTDNHTFLTVADFGTVEVIEDLSELNLKDIALTKIKKLPDGSYRLQLTFSLPRKKQKSKTIQGFDWNMAGNEAFCSSDGKRIKVSDAAIKRADEYEQKINAIKSARDLEGNAHGQSKLYRKLDRRQQKLNAKRSNMLTNEYRHLVHEVVDDCDTIVVEKLDAYEMRKRGKGSAQRKGINRRLAVLKPYELMTILESLVKKQNKRF…	fig.4c
pSMC-Q110K-T4	ISLde6-Q110K mediated knockout plasmid for the ADE2 gene in S. cerevisiae S288C, using the guide ADE2-4	GCTTGCGTCACTTCTCAATT	MPPKKKRKVVSNEEKYGFTRQYHVLLTDKQKIQHEKALKTQNALFQYALKYLFKTYGVKHIGRPMPFSQKPIQYVLNKIKTGFIKDKYGLARWKKSVLFLSSHSADEFLKTVYTNFSKYRKRLVKADKSMDEKARYNFKMNVTKDKYGKHKNQLHKSWYRKGSINFLRNGASFRTITSQKLPEDSKGGIRIEDKHTDNHTFLTVADFGTVEVIEDLSELNLKDIALTKIKKLPDGSYRLQLTFSLPRKKQKSKTIQGFDWNMAGNEAFCSSDGKRIKVSDAAIKRADEYEQKINAIKSARDLEGNAHGQSKLYRKLDRRQQKLNAKRSNMLTNEYRHLVHEVVDDCDTIVVEKLDAYEMRKRGKGSAQRKGINRRLAVLKPYELMTILESLVKKQNKRF…	fig.4c
pSMC-K117R-T4	ISLde6-K117R mediated knockout plasmid for the ADE2 gene in S. cerevisiae S288C, using the guide ADE2-4	GCTTGCGTCACTTCTCAATT	MPPKKKRKVVSNEEKYGFTRQYHVLLTDKQKIQHEKALKTQNALFQYALKYLFKTYGVKHIGRPMPFSQKPIQYVLNKIKTGFIKDKYGLARWKKSVLFLSSHSADEFLKTVYTNFSQYRKRLVRADKSMDEKARYNFKMNVTKDKYGKHKNQLHKSWYRKGSINFLRNGASFRTITSQKLPEDSKGGIRIEDKHTDNHTFLTVADFGTVEVIEDLSELNLKDIALTKIKKLPDGSYRLQLTFSLPRKKQKSKTIQGFDWNMAGNEAFCSSDGKRIKVSDAAIKRADEYEQKINAIKSARDLEGNAHGQSKLYRKLDRRQQKLNAKRSNMLTNEYRHLVHEVVDDCDTIVVEKLDAYEMRKRGKGSAQRKGINRRLAVLKPYELMTILESLVKKQNKRF…	fig.4c
pSMC-Y151R-T4	ISLde6-Y151R mediated knockout plasmid for the ADE2 gene in S. cerevisiae S288C, using the guide ADE2-4	GCTTGCGTCACTTCTCAATT	MPPKKKRKVVSNEEKYGFTRQYHVLLTDKQKIQHEKALKTQNALFQYALKYLFKTYGVKHIGRPMPFSQKPIQYVLNKIKTGFIKDKYGLARWKKSVLFLSSHSADEFLKTVYTNFSQYRKRLVRADKSMDEKARYNFKMNVTKDKYGKHKNQLHKSWRRKGSINFLRNGASFRTITSQKLPEDSKGGIRIEDKHTDNHTFLTVADFGTVEVIEDLSELNLKDIALTKIKKLPDGSYRLQLTFSLPRKKQKSKTIQGFDWNMAGNEAFCSSDGKRIKVSDAAIKRADEYEQKINAIKSARDLEGNAHGQSKLYRKLDRRQQKLNAKRSNMLTNEYRHLVHEVVDDCDTIVVEKLDAYEMRKRGKGSAQRKGINRRLAVLKPYELMTILESLVKKQNKRF…	fig.4c
pSMC-R152Y-T4	ISLde6-R152Y mediated knockout plasmid for the ADE2 gene in S. cerevisiae S288C, using the guide ADE2-4	GCTTGCGTCACTTCTCAATT	MPPKKKRKVVSNEEKYGFTRQYHVLLTDKQKIQHEKALKTQNALFQYALKYLFKTYGVKHIGRPMPFSQKPIQYVLNKIKTGFIKDKYGLARWKKSVLFLSSHSADEFLKTVYTNFSQYRKRLVRADKSMDEKARYNFKMNVTKDKYGKHKNQLHKSWYYKGSINFLRNGASFRTITSQKLPEDSKGGIRIEDKHTDNHTFLTVADFGTVEVIEDLSELNLKDIALTKIKKLPDGSYRLQLTFSLPRKKQKSKTIQGFDWNMAGNEAFCSSDGKRIKVSDAAIKRADEYEQKINAIKSARDLEGNAHGQSKLYRKLDRRQQKLNAKRSNMLTNEYRHLVHEVVDDCDTIVVEKLDAYEMRKRGKGSAQRKGINRRLAVLKPYELMTILESLVKKQNKRF…	fig.4c
pSMC-S155R-T4	ISLde6-S155R mediated knockout plasmid for the ADE2 gene in S. cerevisiae S288C, using the guide ADE2-4	GCTTGCGTCACTTCTCAATT	MPPKKKRKVVSNEEKYGFTRQYHVLLTDKQKIQHEKALKTQNALFQYALKYLFKTYGVKHIGRPMPFSQKPIQYVLNKIKTGFIKDKYGLARWKKSVLFLSSHSADEFLKTVYTNFSQYRKRLVRADKSMDEKARYNFKMNVTKDKYGKHKNQLHKSWYRKGRINFLRNGASFRTITSQKLPEDSKGGIRIEDKHTDNHTFLTVADFGTVEVIEDLSELNLKDIALTKIKKLPDGSYRLQLTFSLPRKKQKSKTIQGFDWNMAGNEAFCSSDGKRIKVSDAAIKRADEYEQKINAIKSARDLEGNAHGQSKLYRKLDRRQQKLNAKRSNMLTNEYRHLVHEVVDDCDTIVVEKLDAYEMRKRGKGSAQRKGINRRLAVLKPYELMTILESLVKKQNKRF…	fig.4c
pSMC-R160K-T4	ISLde6-R160K mediated knockout plasmid for the ADE2 gene in S. cerevisiae S288C, using the guide ADE2-4	GCTTGCGTCACTTCTCAATT	MPPKKKRKVVSNEEKYGFTRQYHVLLTDKQKIQHEKALKTQNALFQYALKYLFKTYGVKHIGRPMPFSQKPIQYVLNKIKTGFIKDKYGLARWKKSVLFLSSHSADEFLKTVYTNFSQYRKRLVKADKSMDEKARYNFKMNVTKDKYGKHKNQLHKSWYRKGSINFLKNGASFRTITSQKLPEDSKGGIRIEDKHTDNHTFLTVADFGTVEVIEDLSELNLKDIALTKIKKLPDGSYRLQLTFSLPRKKQKSKTIQGFDWNMAGNEAFCSSDGKRIKVSDAAIKRADEYEQKINAIKSARDLEGNAHGQSKLYRKLDRRQQKLNAKRSNMLTNEYRHLVHEVVDDCDTIVVEKLDAYEMRKRGKGSAQRKGINRRLAVLKPYELMTILESLVKKQNKRF…	fig.4c
pSMC-N161K-T4	ISLde6-N161K mediated knockout plasmid for the ADE2 gene in S. cerevisiae S288C, using the guide ADE2-4	GCTTGCGTCACTTCTCAATT	MPPKKKRKVVSNEEKYGFTRQYHVLLTDKQKIQHEKALKTQNALFQYALKYLFKTYGVKHIGRPMPFSQKPIQYVLNKIKTGFIKDKYGLARWKKSVLFLSSHSADEFLKTVYTNFSQYRKRLVRADKSMDEKARYNFKMNVTKDKYGKHKNQLHKSWYRKGRINFLRKGASFRTITSQKLPEDSKGGIRIEDKHTDNHTFLTVADFGTVEVIEDLSELNLKDIALTKIKKLPDGSYRLQLTFSLPRKKQKSKTIQGFDWNMAGNEAFCSSDGKRIKVSDAAIKRADEYEQKINAIKSARDLEGNAHGQSKLYRKLDRRQQKLNAKRSNMLTNEYRHLVHEVVDDCDTIVVEKLDAYEMRKRGKGSAQRKGINRRLAVLKPYELMTILESLVKKQNKRF…	fig.4c
pSMC-Q171P-T4	ISLde6-Q171P mediated knockout plasmid for the ADE2 gene in S. cerevisiae S288C, using the guide ADE2-4	GCTTGCGTCACTTCTCAATT	MPPKKKRKVVSNEEKYGFTRQYHVLLTDKQKIQHEKALKTQNALFQYALKYLFKTYGVKHIGRPMPFSQKPIQYVLNKIKTGFIKDKYGLARWKKSVLFLSSHSADEFLKTVYTNFSQYRKRLVRADKSMDEKARYNFKMNVTKDKYGKHKNQLHKSWYRKGRINFLRNGASFRTITSpKLPEDSKGGIRIEDKHTDNHTFLTVADFGTVEVIEDLSELNLKDIALTKIKKLPDGSYRLQLTFSLPRKKQKSKTIQGFDWNMAGNEAFCSSDGKRIKVSDAAIKRADEYEQKINAIKSARDLEGNAHGQSKLYRKLDRRQQKLNAKRSNMLTNEYRHLVHEVVDDCDTIVVEKLDAYEMRKRGKGSAQRKGINRRLAVLKPYELMTILESLVKKQNKRF…	fig.4c
pSMC-Q171K-T4	ISLde6-Q171K mediated knockout plasmid for the ADE2 gene in S. cerevisiae S288C, using the guide ADE2-4	GCTTGCGTCACTTCTCAATT	MPPKKKRKVVSNEEKYGFTRQYHVLLTDKQKIQHEKALKTQNALFQYALKYLFKTYGVKHIGRPMPFSQKPIQYVLNKIKTGFIKDKYGLARWKKSVLFLSSHSADEFLKTVYTNFSQYRKRLVRADKSMDEKARYNFKMNVTKDKYGKHKNQLHKSWYRKGRINFLRNGASFRTITSkKLPEDSKGGIRIEDKHTDNHTFLTVADFGTVEVIEDLSELNLKDIALTKIKKLPDGSYRLQLTFSLPRKKQKSKTIQGFDWNMAGNEAFCSSDGKRIKVSDAAIKRADEYEQKINAIKSARDLEGNAHGQSKLYRKLDRRQQKLNAKRSNMLTNEYRHLVHEVVDDCDTIVVEKLDAYEMRKRGKGSAQRKGINRRLAVLKPYELMTILESLVKKQNKRF…	fig.4c
pSMC-Q171R-T4	ISLde6-Q171R mediated knockout plasmid for the ADE2 gene in S. cerevisiae S288C, using the guide ADE2-4	GCTTGCGTCACTTCTCAATT	MPPKKKRKVVSNEEKYGFTRQYHVLLTDKQKIQHEKALKTQNALFQYALKYLFKTYGVKHIGRPMPFSQKPIQYVLNKIKTGFIKDKYGLARWKKSVLFLSSHSADEFLKTVYTNFSQYRKRLVRADKSMDEKARYNFKMNVTKDKYGKHKNQLHKSWYRKGRINFLRNGASFRTITSrKLPEDSKGGIRIEDKHTDNHTFLTVADFGTVEVIEDLSELNLKDIALTKIKKLPDGSYRLQLTFSLPRKKQKSKTIQGFDWNMAGNEAFCSSDGKRIKVSDAAIKRADEYEQKINAIKSARDLEGNAHGQSKLYRKLDRRQQKLNAKRSNMLTNEYRHLVHEVVDDCDTIVVEKLDAYEMRKRGKGSAQRKGINRRLAVLKPYELMTILESLVKKQNKRF…	fig.4c
pSMC-N190R-T4	ISLde6-N190R mediated knockout plasmid for the ADE2 gene in S. cerevisiae S288C, using the guide ADE2-4	GCTTGCGTCACTTCTCAATT	MPPKKKRKVVSNEEKYGFTRQYHVLLTDKQKIQHEKALKTQNALFQYALKYLFKTYGVKHIGRPMPFSQKPIQYVLNKIKTGFIKDKYGLARWKKSVLFLSSHSADEFLKTVYTNFSQYRKRLVKADKSMDEKARYNFKMNVTKDKYGKHKNQLHKSWYRKGSINFLRNGASFRTITSQKLPEDSKGGIRIEDKHTDRHTFLTVADFGTVEVIEDLSELNLKDIALTKIKKLPDGSYRLQLTFSLPRKKQKSKTIQGFDWNMAGNEAFCSSDGKRIKVSDAAIKRADEYEQKINAIKSARDLEGNAHGQSKLYRKLDRRQQKLNAKRSNMLTNEYRHLVHEVVDDCDTIVVEKLDAYEMRKRGKGSAQRKGINRRLAVLKPYELMTILESLVKKQNKRF…	fig.4c
pSMC-D207N-T4	ISLde6-D207N mediated knockout plasmid for the ADE2 gene in S. cerevisiae S288C, using the guide ADE2-4	GCTTGCGTCACTTCTCAATT	MPPKKKRKVVSNEEKYGFTRQYHVLLTDKQKIQHEKALKTQNALFQYALKYLFKTYGVKHIGRPMPFSQKPIQYVLNKIKTGFIKDKYGLARWKKSVLFLSSHSADEFLKTVYTNFSQYRKRLVRADKSMDEKARYNFKMNVTKDKYGKHKNQLHKSWYRKGRINFLRNGASFRTITSQKLPEDSKGGIRIEDKHTDNHTFLTVADFGTVEVIEnLSELNLKDIALTKIKKLPDGSYRLQLTFSLPRKKQKSKTIQGFDWNMAGNEAFCSSDGKRIKVSDAAIKRADEYEQKINAIKSARDLEGNAHGQSKLYRKLDRRQQKLNAKRSNMLTNEYRHLVHEVVDDCDTIVVEKLDAYEMRKRGKGSAQRKGINRRLAVLKPYELMTILESLVKKQNKRF…	fig.4c
pSMC-K222R-T4	ISLde6-K222R mediated knockout plasmid for the ADE2 gene in S. cerevisiae S288C, using the guide ADE2-4	GCTTGCGTCACTTCTCAATT	MPPKKKRKVVSNEEKYGFTRQYHVLLTDKQKIQHEKALKTQNALFQYALKYLFKTYGVKHIGRPMPFSQKPIQYVLNKIKTGFIKDKYGLARWKKSVLFLSSHSADEFLKTVYTNFSQYRKRLVRADKSMDEKARYNFKMNVTKDKYGKHKNQLHKSWYRKGRINFLRNGASFRTITSQKLPEDSKGGIRIEDKHTDNHTFLTVADFGTVEVIEDLSELNLKDIALTKIrKLPDGSYRLQLTFSLPRKKQKSKTIQGFDWNMAGNEAFCSSDGKRIKVSDAAIKRADEYEQKINAIKSARDLEGNAHGQSKLYRKLDRRQQKLNAKRSNMLTNEYRHLVHEVVDDCDTIVVEKLDAYEMRKRGKGSAQRKGINRRLAVLKPYELMTILESLVKKQNKRF…	fig.4c
pSMC-F235Y-T4	ISLde6-F235Y mediated knockout plasmid for the ADE2 gene in S. cerevisiae S288C, using the guide ADE2-4	GCTTGCGTCACTTCTCAATT	MPPKKKRKVVSNEEKYGFTRQYHVLLTDKQKIQHEKALKTQNALFQYALKYLFKTYGVKHIGRPMPFSQKPIQYVLNKIKTGFIKDKYGLARWKKSVLFLSSHSADEFLKTVYTNFSQYRKRLVKADKSMDEKARYNFKMNVTKDKYGKHKNQLHKSWYRKGSINFLRNGASFRTITSQKLPEDSKGGIRIEDKHTDNHTFLTVADFGTVEVIEDLSELNLKDIALTKIKKLPDGSYRLQLTYSLPRKKQKSKTIQGFDWNMAGNEAFCSSDGKRIKVSDAAIKRADEYEQKINAIKSARDLEGNAHGQSKLYRKLDRRQQKLNAKRSNMLTNEYRHLVHEVVDDCDTIVVEKLDAYEMRKRGKGSAQRKGINRRLAVLKPYELMTILESLVKKQNKRF…	fig.4c
pSMC-S236E-T4	ISLde6-S236E mediated knockout plasmid for the ADE2 gene in S. cerevisiae S288C, using the guide ADE2-4	GCTTGCGTCACTTCTCAATT	MPPKKKRKVVSNEEKYGFTRQYHVLLTDKQKIQHEKALKTQNALFQYALKYLFKTYGVKHIGRPMPFSQKPIQYVLNKIKTGFIKDKYGLARWKKSVLFLSSHSADEFLKTVYTNFSQYRKRLVRADKSMDEKARYNFKMNVTKDKYGKHKNQLHKSWYRKGRINFLRNGASFRTITSQKLPEDSKGGIRIEDKHTDNHTFLTVADFGTVEVIEDLSELNLKDIALTKIKKLPDGSYRLQLTFeLPRKKQKSKTIQGFDWNMAGNEAFCSSDGKRIKVSDAAIKRADEYEQKINAIKSARDLEGNAHGQSKLYRKLDRRQQKLNAKRSNMLTNEYRHLVHEVVDDCDTIVVEKLDAYEMRKRGKGSAQRKGINRRLAVLKPYELMTILESLVKKQNKRF…	fig.4c
pSMC-S236Q-T4	ISLde6-S236Q mediated knockout plasmid for the ADE2 gene in S. cerevisiae S288C, using the guide ADE2-4	GCTTGCGTCACTTCTCAATT	MPPKKKRKVVSNEEKYGFTRQYHVLLTDKQKIQHEKALKTQNALFQYALKYLFKTYGVKHIGRPMPFSQKPIQYVLNKIKTGFIKDKYGLARWKKSVLFLSSHSADEFLKTVYTNFSQYRKRLVRADKSMDEKARYNFKMNVTKDKYGKHKNQLHKSWYRKGRINFLRNGASFRTITSQKLPEDSKGGIRIEDKHTDNHTFLTVADFGTVEVIEDLSELNLKDIALTKIKKLPDGSYRLQLTFqLPRKKQKSKTIQGFDWNMAGNEAFCSSDGKRIKVSDAAIKRADEYEQKINAIKSARDLEGNAHGQSKLYRKLDRRQQKLNAKRSNMLTNEYRHLVHEVVDDCDTIVVEKLDAYEMRKRGKGSAQRKGINRRLAVLKPYELMTILESLVKKQNKRF…	fig.4c
pSMC-S236R-T4	ISLde6-S236R mediated knockout plasmid for the ADE2 gene in S. cerevisiae S288C, using the guide ADE2-4	GCTTGCGTCACTTCTCAATT	MPPKKKRKVVSNEEKYGFTRQYHVLLTDKQKIQHEKALKTQNALFQYALKYLFKTYGVKHIGRPMPFSQKPIQYVLNKIKTGFIKDKYGLARWKKSVLFLSSHSADEFLKTVYTNFSQYRKRLVRADKSMDEKARYNFKMNVTKDKYGKHKNQLHKSWYRKGRINFLRNGASFRTITSQKLPEDSKGGIRIEDKHTDNHTFLTVADFGTVEVIEDLSELNLKDIALTKIKKLPDGSYRLQLTFrLPRKKQKSKTIQGFDWNMAGNEAFCSSDGKRIKVSDAAIKRADEYEQKINAIKSARDLEGNAHGQSKLYRKLDRRQQKLNAKRSNMLTNEYRHLVHEVVDDCDTIVVEKLDAYEMRKRGKGSAQRKGINRRLAVLKPYELMTILESLVKKQNKRF…	fig.4c
pSMC-K240R-T4	ISLde6-K240R mediated knockout plasmid for the ADE2 gene in S. cerevisiae S288C, using the guide ADE2-4	GCTTGCGTCACTTCTCAATT	MPPKKKRKVVSNEEKYGFTRQYHVLLTDKQKIQHEKALKTQNALFQYALKYLFKTYGVKHIGRPMPFSQKPIQYVLNKIKTGFIKDKYGLARWKKSVLFLSSHSADEFLKTVYTNFSQYRKRLVRADKSMDEKARYNFKMNVTKDKYGKHKNQLHKSWYRKGRINFLRNGASFRTITSQKLPEDSKGGIRIEDKHTDNHTFLTVADFGTVEVIEDLSELNLKDIALTKIKKLPDGSYRLQLTFSLPRrKQKSKTIQGFDWNMAGNEAFCSSDGKRIKVSDAAIKRADEYEQKINAIKSARDLEGNAHGQSKLYRKLDRRQQKLNAKRSNMLTNEYRHLVHEVVDDCDTIVVEKLDAYEMRKRGKGSAQRKGINRRLAVLKPYELMTILESLVKKQNKRF…	fig.4c
pSMC-D293R-T4	ISLde6-D293R mediated knockout plasmid for the ADE2 gene in S. cerevisiae S288C, using the guide ADE2-4	GCTTGCGTCACTTCTCAATT	MPPKKKRKVVSNEEKYGFTRQYHVLLTDKQKIQHEKALKTQNALFQYALKYLFKTYGVKHIGRPMPFSQKPIQYVLNKIKTGFIKDKYGLARWKKSVLFLSSHSADEFLKTVYTNFSQYRKRLVRADKSMDEKARYNFKMNVTKDKYGKHKNQLHKSWYRKGRINFLRNGASFRTITSQKLPEDSKGGIRIEDKHTDNHTFLTVADFGTVEVIEDLSELNLKDIALTKIKKLPDGSYRLQLTFSLPRKKQKSKTIQGFDWNMAGNEAFCSSDGKRIKVSDAAIKRADEYEQKINAIKSARrLEGNAHGQSKLYRKLDRRQQKLNAKRSNMLTNEYRHLVHEVVDDCDTIVVEKLDAYEMRKRGKGSAQRKGINRRLAVLKPYELMTILESLVKKQNKRF…	fig.4c
pSMC-L308R-T4	ISLde6-L308R mediated knockout plasmid for the ADE2 gene in S. cerevisiae S288C, using the guide ADE2-4	GCTTGCGTCACTTCTCAATT	MPPKKKRKVVSNEEKYGFTRQYHVLLTDKQKIQHEKALKTQNALFQYALKYLFKTYGVKHIGRPMPFSQKPIQYVLNKIKTGFIKDKYGLARWKKSVLFLSSHSADEFLKTVYTNFSQYRKRLVKADKSMDEKARYNFKMNVTKDKYGKHKNQLHKSWYRKGSINFLRNGASFRTITSQKLPEDSKGGIRIEDKHTDNHTFLTVADFGTVEVIEDLSELNLKDIALTKIKKLPDGSYRLQLTFSLPRKKQKSKTIQGFDWNMAGNEAFCSSDGKRIKVSDAAIKRADEYEQKINAIKSARDLEGNAHGQSKLYRKRDRRQQKLNAKRSNMLTNEYRHLVHEVVDDCDTIVVEKLDAYEMRKRGKGSAQRKGINRRLAVLKPYELMTILESLVKKQNKRF…	fig.4c
pSMC-R310H-T4	ISLde6-R310H mediated knockout plasmid for the ADE2 gene in S. cerevisiae S288C, using the guide ADE2-4	GCTTGCGTCACTTCTCAATT	MPPKKKRKVVSNEEKYGFTRQYHVLLTDKQKIQHEKALKTQNALFQYALKYLFKTYGVKHIGRPMPFSQKPIQYVLNKIKTGFIKDKYGLARWKKSVLFLSSHSADEFLKTVYTNFSQYRKRLVRADKSMDEKARYNFKMNVTKDKYGKHKNQLHKSWYRKGRINFLRNGASFRTITSQKLPEDSKGGIRIEDKHTDNHTFLTVADFGTVEVIEDLSELNLKDIALTKIKKLPDGSYRLQLTFSLPRKKQKSKTIQGFDWNMAGNEAFCSSDGKRIKVSDAAIKRADEYEQKINAIKSARDLEGNAHGQSKLYRKLDhRQQKLNAKRSNMLTNEYRHLVHEVVDDCDTIVVEKLDAYEMRKRGKGSAQRKGINRRLAVLKPYELMTILESLVKKQNKRF…	fig.4c
pSMC-K314R-T4	ISLde6-K314R mediated knockout plasmid for the ADE2 gene in S. cerevisiae S288C, using the guide ADE2-4	GCTTGCGTCACTTCTCAATT	MPPKKKRKVVSNEEKYGFTRQYHVLLTDKQKIQHEKALKTQNALFQYALKYLFKTYGVKHIGRPMPFSQKPIQYVLNKIKTGFIKDKYGLARWKKSVLFLSSHSADEFLKTVYTNFSQYRKRLVKADKSMDEKARYNFKMNVTKDKYGKHKNQLHKSWYRKGSINFLRNGASFRTITSQKLPEDSKGGIRIEDKHTDNHTFLTVADFGTVEVIEDLSELNLKDIALTKIKKLPDGSYRLQLTFSLPRKKQKSKTIQGFDWNMAGNEAFCSSDGKRIKVSDAAIKRADEYEQKINAIKSARDLEGNAHGQSKLYRKLDRRQQRLNAKRSNMLTNEYRHLVHEVVDDCDTIVVEKLDAYEMRKRGKGSAQRKGINRRLAVLKPYELMTILESLVKKQNKRF…	fig.4c
pSMC-N321R-T4	ISLde6-N321R mediated knockout plasmid for the ADE2 gene in S. cerevisiae S288C, using the guide ADE2-4	GCTTGCGTCACTTCTCAATT	MPPKKKRKVVSNEEKYGFTRQYHVLLTDKQKIQHEKALKTQNALFQYALKYLFKTYGVKHIGRPMPFSQKPIQYVLNKIKTGFIKDKYGLARWKKSVLFLSSHSADEFLKTVYTNFSQYRKRLVRADKSMDEKARYNFKMNVTKDKYGKHKNQLHKSWYRKGRINFLRNGASFRTITSQKLPEDSKGGIRIEDKHTDNHTFLTVADFGTVEVIEDLSELNLKDIALTKIKKLPDGSYRLQLTFSLPRKKQKSKTIQGFDWNMAGNEAFCSSDGKRIKVSDAAIKRADEYEQKINAIKSARDLEGNAHGQSKLYRKLDRRQQKLNAKRSrMLTNEYRHLVHEVVDDCDTIVVEKLDAYEMRKRGKGSAQRKGINRRLAVLKPYELMTILESLVKKQNKRF…	fig.4c
pSMC-N325D-T4	ISLde6-N325D mediated knockout plasmid for the ADE2 gene in S. cerevisiae S288C, using the guide ADE2-4	GCTTGCGTCACTTCTCAATT	MPPKKKRKVVSNEEKYGFTRQYHVLLTDKQKIQHEKALKTQNALFQYALKYLFKTYGVKHIGRPMPFSQKPIQYVLNKIKTGFIKDKYGLARWKKSVLFLSSHSADEFLKTVYTNFSQYRKRLVRADKSMDEKARYNFKMNVTKDKYGKHKNQLHKSWYRKGRINFLRNGASFRTITSQKLPEDSKGGIRIEDKHTDNHTFLTVADFGTVEVIEDLSELNLKDIALTKIKKLPDGSYRLQLTFSLPRKKQKSKTIQGFDWNMAGNEAFCSSDGKRIKVSDAAIKRADEYEQKINAIKSARDLEGNAHGQSKLYRKLDRRQQKLNAKRSNMLTdEYRHLVHEVVDDCDTIVVEKLDAYEMRKRGKGSAQRKGINRRLAVLKPYELMTILESLVKKQNKRF…	fig.4c
pSMC-E350N-T4	ISLde6-E350N mediated knockout plasmid for the ADE2 gene in S. cerevisiae S288C, using the guide ADE2-4	GCTTGCGTCACTTCTCAATT	MPPKKKRKVVSNEEKYGFTRQYHVLLTDKQKIQHEKALKTQNALFQYALKYLFKTYGVKHIGRPMPFSQKPIQYVLNKIKTGFIKDKYGLARWKKSVLFLSSHSADEFLKTVYTNFSQYRKRLVRADKSMDEKARYNFKMNVTKDKYGKHKNQLHKSWYRKGRINFLRNGASFRTITSQKLPEDSKGGIRIEDKHTDNHTFLTVADFGTVEVIEDLSELNLKDIALTKIKKLPDGSYRLQLTFSLPRKKQKSKTIQGFDWNMAGNEAFCSSDGKRIKVSDAAIKRADEYEQKINAIKSARDLEGNAHGQSKLYRKLDRRQQKLNAKRSNMLTNEYRHLVHEVVDDCDTIVVEKLDAYnMRKRGKGSAQRKGINRRLAVLKPYELMTILESLVKKQNKRF…	fig.4c
pSMC-E350K-T4	ISLde6-E350K mediated knockout plasmid for the ADE2 gene in S. cerevisiae S288C, using the guide ADE2-4	GCTTGCGTCACTTCTCAATT	MPPKKKRKVVSNEEKYGFTRQYHVLLTDKQKIQHEKALKTQNALFQYALKYLFKTYGVKHIGRPMPFSQKPIQYVLNKIKTGFIKDKYGLARWKKSVLFLSSHSADEFLKTVYTNFSQYRKRLVRADKSMDEKARYNFKMNVTKDKYGKHKNQLHKSWYRKGRINFLRNGASFRTITSQKLPEDSKGGIRIEDKHTDNHTFLTVADFGTVEVIEDLSELNLKDIALTKIKKLPDGSYRLQLTFSLPRKKQKSKTIQGFDWNMAGNEAFCSSDGKRIKVSDAAIKRADEYEQKINAIKSARDLEGNAHGQSKLYRKLDRRQQKLNAKRSNMLTNEYRHLVHEVVDDCDTIVVEKLDAYkMRKRGKGSAQRKGINRRLAVLKPYELMTILESLVKKQNKRF…	fig.4c
pSMC-E350R-T4	ISLde6-E350R mediated knockout plasmid for the ADE2 gene in S. cerevisiae S288C, using the guide ADE2-4	GCTTGCGTCACTTCTCAATT	MPPKKKRKVVSNEEKYGFTRQYHVLLTDKQKIQHEKALKTQNALFQYALKYLFKTYGVKHIGRPMPFSQKPIQYVLNKIKTGFIKDKYGLARWKKSVLFLSSHSADEFLKTVYTNFSQYRKRLVRADKSMDEKARYNFKMNVTKDKYGKHKNQLHKSWYRKGRINFLRNGASFRTITSQKLPEDSKGGIRIEDKHTDNHTFLTVADFGTVEVIEDLSELNLKDIALTKIKKLPDGSYRLQLTFSLPRKKQKSKTIQGFDWNMAGNEAFCSSDGKRIKVSDAAIKRADEYEQKINAIKSARDLEGNAHGQSKLYRKLDRRQQKLNAKRSNMLTNEYRHLVHEVVDDCDTIVVEKLDAYrMRKRGKGSAQRKGINRRLAVLKPYELMTILESLVKKQNKRF…	fig.4c
pSMC-M351L-T4	ISLde6-M351L mediated knockout plasmid for the ADE2 gene in S. cerevisiae S288C, using the guide ADE2-4	GCTTGCGTCACTTCTCAATT	MPPKKKRKVVSNEEKYGFTRQYHVLLTDKQKIQHEKALKTQNALFQYALKYLFKTYGVKHIGRPMPFSQKPIQYVLNKIKTGFIKDKYGLARWKKSVLFLSSHSADEFLKTVYTNFSQYRKRLVRADKSMDEKARYNFKMNVTKDKYGKHKNQLHKSWYRKGRINFLRNGASFRTITSQKLPEDSKGGIRIEDKHTDNHTFLTVADFGTVEVIEDLSELNLKDIALTKIKKLPDGSYRLQLTFSLPRKKQKSKTIQGFDWNMAGNEAFCSSDGKRIKVSDAAIKRADEYEQKINAIKSARDLEGNAHGQSKLYRKLDRRQQKLNAKRSNMLTNEYRHLVHEVVDDCDTIVVEKLDAYElRKRGKGSAQRKGINRRLAVLKPYELMTILESLVKKQNKRF…	fig.4c
pSMC-K362R-T4	ISLde6-K362R mediated knockout plasmid for the ADE2 gene in S. cerevisiae S288C, using the guide ADE2-4	GCTTGCGTCACTTCTCAATT	MPPKKKRKVVSNEEKYGFTRQYHVLLTDKQKIQHEKALKTQNALFQYALKYLFKTYGVKHIGRPMPFSQKPIQYVLNKIKTGFIKDKYGLARWKKSVLFLSSHSADEFLKTVYTNFSQYRKRLVRADKSMDEKARYNFKMNVTKDKYGKHKNQLHKSWYRKGRINFLRNGASFRTITSQKLPEDSKGGIRIEDKHTDNHTFLTVADFGTVEVIEDLSELNLKDIALTKIKKLPDGSYRLQLTFSLPRKKQKSKTIQGFDWNMAGNEAFCSSDGKRIKVSDAAIKRADEYEQKINAIKSARDLEGNAHGQSKLYRKLDRRQQKLNAKRSNMLTNEYRHLVHEVVDDCDTIVVEKLDAYEMRKRGKGSAQRrGINRRLAVLKPYELMTILESLVKKQNKRF…	fig.4c
pSMC-N365R-T4	ISLde6-N365R mediated knockout plasmid for the ADE2 gene in S. cerevisiae S288C, using the guide ADE2-4	GCTTGCGTCACTTCTCAATT	MPPKKKRKVVSNEEKYGFTRQYHVLLTDKQKIQHEKALKTQNALFQYALKYLFKTYGVKHIGRPMPFSQKPIQYVLNKIKTGFIKDKYGLARWKKSVLFLSSHSADEFLKTVYTNFSQYRKRLVRADKSMDEKARYNFKMNVTKDKYGKHKNQLHKSWYRKGRINFLRNGASFRTITSQKLPEDSKGGIRIEDKHTDNHTFLTVADFGTVEVIEDLSELNLKDIALTKIKKLPDGSYRLQLTFSLPRKKQKSKTIQGFDWNMAGNEAFCSSDGKRIKVSDAAIKRADEYEQKINAIKSARDLEGNAHGQSKLYRKLDRRQQKLNAKRSNMLTNEYRHLVHEVVDDCDTIVVEKLDAYEMRKRGKGSAQRKGIrRRLAVLKPYELMTILESLVKKQNKRF…	fig.4c
pSMC-R367T-T4	ISLde6-R367T mediated knockout plasmid for the ADE2 gene in S. cerevisiae S288C, using the guide ADE2-4	GCTTGCGTCACTTCTCAATT	MPPKKKRKVVSNEEKYGFTRQYHVLLTDKQKIQHEKALKTQNALFQYALKYLFKTYGVKHIGRPMPFSQKPIQYVLNKIKTGFIKDKYGLARWKKSVLFLSSHSADEFLKTVYTNFSQYRKRLVRADKSMDEKARYNFKMNVTKDKYGKHKNQLHKSWYRKGRINFLRNGASFRTITSQKLPEDSKGGIRIEDKHTDNHTFLTVADFGTVEVIEDLSELNLKDIALTKIKKLPDGSYRLQLTFSLPRKKQKSKTIQGFDWNMAGNEAFCSSDGKRIKVSDAAIKRADEYEQKINAIKSARDLEGNAHGQSKLYRKLDRRQQKLNAKRSNMLTNEYRHLVHEVVDDCDTIVVEKLDAYEMRKRGKGSAQRKGINRtLAVLKPYELMTILESLVKKQNKRF…	fig.4c
pSMC-K372R-T4	ISLde6-K372R mediated knockout plasmid for the ADE2 gene in S. cerevisiae S288C, using the guide ADE2-4	GCTTGCGTCACTTCTCAATT	MPPKKKRKVVSNEEKYGFTRQYHVLLTDKQKIQHEKALKTQNALFQYALKYLFKTYGVKHIGRPMPFSQKPIQYVLNKIKTGFIKDKYGLARWKKSVLFLSSHSADEFLKTVYTNFSQYRKRLVKADKSMDEKARYNFKMNVTKDKYGKHKNQLHKSWYRKGSINFLRNGASFRTITSQKLPEDSKGGIRIEDKHTDNHTFLTVADFGTVEVIEDLSELNLKDIALTKIKKLPDGSYRLQLTFSLPRKKQKSKTIQGFDWNMAGNEAFCSSDGKRIKVSDAAIKRADEYEQKINAIKSARDLEGNAHGQSKLYRKLDRRQQKLNAKRSNMLTNEYRHLVHEVVDDCDTIVVEKLDAYEMRKRGKGSAQRKGINRRLAVLRPYELMTILESLVKKQNKRF…	fig.4c
pSMC-K372N-T4	ISLde6-K372N mediated knockout plasmid for the ADE2 gene in S. cerevisiae S288C, using the guide ADE2-4	GCTTGCGTCACTTCTCAATT	MPPKKKRKVVSNEEKYGFTRQYHVLLTDKQKIQHEKALKTQNALFQYALKYLFKTYGVKHIGRPMPFSQKPIQYVLNKIKTGFIKDKYGLARWKKSVLFLSSHSADEFLKTVYTNFSQYRKRLVRADKSMDEKARYNFKMNVTKDKYGKHKNQLHKSWYRKGRINFLRNGASFRTITSQKLPEDSKGGIRIEDKHTDNHTFLTVADFGTVEVIEDLSELNLKDIALTKIKKLPDGSYRLQLTFSLPRKKQKSKTIQGFDWNMAGNEAFCSSDGKRIKVSDAAIKRADEYEQKINAIKSARDLEGNAHGQSKLYRKLDRRQQKLNAKRSNMLTNEYRHLVHEVVDDCDTIVVEKLDAYEMRKRGKGSAQRKGINRRLAVLnPYELMTILESLVKKQNKRF…	fig.4c
pSMC-S382Y-T4	ISLde6-S382Y mediated knockout plasmid for the ADE2 gene in S. cerevisiae S288C, using the guide ADE2-4	GCTTGCGTCACTTCTCAATT	MPPKKKRKVVSNEEKYGFTRQYHVLLTDKQKIQHEKALKTQNALFQYALKYLFKTYGVKHIGRPMPFSQKPIQYVLNKIKTGFIKDKYGLARWKKSVLFLSSHSADEFLKTVYTNFSQYRKRLVRADKSMDEKARYNFKMNVTKDKYGKHKNQLHKSWYRKGRINFLRNGASFRTITSQKLPEDSKGGIRIEDKHTDNHTFLTVADFGTVEVIEDLSELNLKDIALTKIKKLPDGSYRLQLTFSLPRKKQKSKTIQGFDWNMAGNEAFCSSDGKRIKVSDAAIKRADEYEQKINAIKSARDLEGNAHGQSKLYRKLDRRQQKLNAKRSNMLTNEYRHLVHEVVDDCDTIVVEKLDAYEMRKRGKGSAQRKGINRRLAVLKPYELMTILEyLVKKQNKRF…	fig.4c
pSMC-S382R-T4	ISLde6-S382R mediated knockout plasmid for the ADE2 gene in S. cerevisiae S288C, using the guide ADE2-4	GCTTGCGTCACTTCTCAATT	MPPKKKRKVVSNEEKYGFTRQYHVLLTDKQKIQHEKALKTQNALFQYALKYLFKTYGVKHIGRPMPFSQKPIQYVLNKIKTGFIKDKYGLARWKKSVLFLSSHSADEFLKTVYTNFSQYRKRLVRADKSMDEKARYNFKMNVTKDKYGKHKNQLHKSWYRKGRINFLRNGASFRTITSQKLPEDSKGGIRIEDKHTDNHTFLTVADFGTVEVIEDLSELNLKDIALTKIKKLPDGSYRLQLTFSLPRKKQKSKTIQGFDWNMAGNEAFCSSDGKRIKVSDAAIKRADEYEQKINAIKSARDLEGNAHGQSKLYRKLDRRQQKLNAKRSNMLTNEYRHLVHEVVDDCDTIVVEKLDAYEMRKRGKGSAQRKGINRRLAVLKPYELMTILErLVKKQNKRF…	fig.4c
pSMC-K386W-T4	ISLde6-K386W mediated knockout plasmid for the ADE2 gene in S. cerevisiae S288C, using the guide ADE2-4	GCTTGCGTCACTTCTCAATT	MPPKKKRKVVSNEEKYGFTRQYHVLLTDKQKIQHEKALKTQNALFQYALKYLFKTYGVKHIGRPMPFSQKPIQYVLNKIKTGFIKDKYGLARWKKSVLFLSSHSADEFLKTVYTNFSQYRKRLVRADKSMDEKARYNFKMNVTKDKYGKHKNQLHKSWYRKGRINFLRNGASFRTITSQKLPEDSKGGIRIEDKHTDNHTFLTVADFGTVEVIEDLSELNLKDIALTKIKKLPDGSYRLQLTFSLPRKKQKSKTIQGFDWNMAGNEAFCSSDGKRIKVSDAAIKRADEYEQKINAIKSARDLEGNAHGQSKLYRKLDRRQQKLNAKRSNMLTNEYRHLVHEVVDDCDTIVVEKLDAYEMRKRGKGSAQRKGINRRLAVLKPYELMTILESLVKwQNKRF…	fig.4c
pSMC-K386R-T4	ISLde6-K386R mediated knockout plasmid for the ADE2 gene in S. cerevisiae S288C, using the guide ADE2-4	GCTTGCGTCACTTCTCAATT	MPPKKKRKVVSNEEKYGFTRQYHVLLTDKQKIQHEKALKTQNALFQYALKYLFKTYGVKHIGRPMPFSQKPIQYVLNKIKTGFIKDKYGLARWKKSVLFLSSHSADEFLKTVYTNFSQYRKRLVRADKSMDEKARYNFKMNVTKDKYGKHKNQLHKSWYRKGRINFLRNGASFRTITSQKLPEDSKGGIRIEDKHTDNHTFLTVADFGTVEVIEDLSELNLKDIALTKIKKLPDGSYRLQLTFSLPRKKQKSKTIQGFDWNMAGNEAFCSSDGKRIKVSDAAIKRADEYEQKINAIKSARDLEGNAHGQSKLYRKLDRRQQKLNAKRSNMLTNEYRHLVHEVVDDCDTIVVEKLDAYEMRKRGKGSAQRKGINRRLAVLKPYELMTILESLVKrQNKRF…	fig.4c
pSMC-S400R-T4	ISLde6-S400R mediated knockout plasmid for the ADE2 gene in S. cerevisiae S288C, using the guide ADE2-4	GCTTGCGTCACTTCTCAATT	MPPKKKRKVVSNEEKYGFTRQYHVLLTDKQKIQHEKALKTQNALFQYALKYLFKTYGVKHIGRPMPFSQKPIQYVLNKIKTGFIKDKYGLARWKKSVLFLSSHSADEFLKTVYTNFSQYRKRLVRADKSMDEKARYNFKMNVTKDKYGKHKNQLHKSWYRKGRINFLRNGASFRTITSQKLPEDSKGGIRIEDKHTDNHTFLTVADFGTVEVIEDLSELNLKDIALTKIKKLPDGSYRLQLTFSLPRKKQKSKTIQGFDWNMAGNEAFCSSDGKRIKVSDAAIKRADEYEQKINAIKSARDLEGNAHGQSKLYRKLDRRQQKLNAKRSNMLTNEYRHLVHEVVDDCDTIVVEKLDAYEMRKRGKGSAQRKGINRRLAVLKPYELMTILESLVKKQNKRF…	fig.4c
pSMC-S400D-T4	ISLde6-S400D mediated knockout plasmid for the ADE2 gene in S. cerevisiae S288C, using the guide ADE2-4	GCTTGCGTCACTTCTCAATT	MPPKKKRKVVSNEEKYGFTRQYHVLLTDKQKIQHEKALKTQNALFQYALKYLFKTYGVKHIGRPMPFSQKPIQYVLNKIKTGFIKDKYGLARWKKSVLFLSSHSADEFLKTVYTNFSQYRKRLVRADKSMDEKARYNFKMNVTKDKYGKHKNQLHKSWYRKGRINFLRNGASFRTITSQKLPEDSKGGIRIEDKHTDNHTFLTVADFGTVEVIEDLSELNLKDIALTKIKKLPDGSYRLQLTFSLPRKKQKSKTIQGFDWNMAGNEAFCSSDGKRIKVSDAAIKRADEYEQKINAIKSARDLEGNAHGQSKLYRKLDRRQQKLNAKRSNMLTNEYRHLVHEVVDDCDTIVVEKLDAYEMRKRGKGSAQRKGINRRLAVLKPYELMTILESLVKKQNKRF…	fig.4c
Plasmids	description	guide sequecne(5'→3')	protein sequence	figure
pSMC-TnpB-T1	TnpB-mediated knockout plasmid for the ADE2 gene in S. cerevisiae S288C, using the guide ADE2-1	CTCAAATGAGCTTCAAATTG	MPPKKKRKVVSNEEKYGFTRQYHVLLTDKQKIQHEKALKTQNALFQYALKYLFKTYGVKHIGRPMPFSQKPIQYVLNKIKTGFIKDKYGLARWKKSVLFLSSHSADEFLKTVYTNFSQYRKRLVKADKSMDEKARYNFKMNVTKDKYGKHKNQLHKSWYRKGSINFLRNGASFRTITSQKLPEDSKGGIRIEDKHTDNHTFLTVADFGTVEVIEDLSELNLKDIALTKIKKLPDGSYRLQLTFSLPRKKQKSKTIQGFDWNMAGNEAFCSSDGKRIKVSDAAIKRADEYEQKINAIKSARDLEGNAHGQSKLYRKLDRRQQKLNAKRSNMLTNEYRHLVHEVVDDCDTIVVEKLDAYEMRKRGKGSAQRKGINRRLAVLKPYELMTILESLVKKQNKRF…	fig.4d
pSMC-TnpB-T2	TnpB-mediated knockout plasmid for the ADE2 gene in S. cerevisiae S288C, using the guide ADE2-2	TAAATGCTCTTTTTGAATAT	MPPKKKRKVVSNEEKYGFTRQYHVLLTDKQKIQHEKALKTQNALFQYALKYLFKTYGVKHIGRPMPFSQKPIQYVLNKIKTGFIKDKYGLARWKKSVLFLSSHSADEFLKTVYTNFSQYRKRLVKADKSMDEKARYNFKMNVTKDKYGKHKNQLHKSWYRKGSINFLRNGASFRTITSQKLPEDSKGGIRIEDKHTDNHTFLTVADFGTVEVIEDLSELNLKDIALTKIKKLPDGSYRLQLTFSLPRKKQKSKTIQGFDWNMAGNEAFCSSDGKRIKVSDAAIKRADEYEQKINAIKSARDLEGNAHGQSKLYRKLDRRQQKLNAKRSNMLTNEYRHLVHEVVDDCDTIVVEKLDAYEMRKRGKGSAQRKGINRRLAVLKPYELMTILESLVKKQNKRF…	fig.4d
pSMC-TnpB-T3	TnpB-mediated knockout plasmid for the ADE2 gene in S. cerevisiae S288C, using the guide ADE2-3	TGCATTTTCTGCCAACAACT	MPPKKKRKVVSNEEKYGFTRQYHVLLTDKQKIQHEKALKTQNALFQYALKYLFKTYGVKHIGRPMPFSQKPIQYVLNKIKTGFIKDKYGLARWKKSVLFLSSHSADEFLKTVYTNFSQYRKRLVKADKSMDEKARYNFKMNVTKDKYGKHKNQLHKSWYRKGSINFLRNGASFRTITSQKLPEDSKGGIRIEDKHTDNHTFLTVADFGTVEVIEDLSELNLKDIALTKIKKLPDGSYRLQLTFSLPRKKQKSKTIQGFDWNMAGNEAFCSSDGKRIKVSDAAIKRADEYEQKINAIKSARDLEGNAHGQSKLYRKLDRRQQKLNAKRSNMLTNEYRHLVHEVVDDCDTIVVEKLDAYEMRKRGKGSAQRKGINRRLAVLKPYELMTILESLVKKQNKRF…	fig.4d
pSMC-TnpB-T4	TnpB-mediated knockout plasmid for the ADE2 gene in S. cerevisiae S288C, using the guide ADE2-4	GCTTGCGTCACTTCTCAATT	MPPKKKRKVVSNEEKYGFTRQYHVLLTDKQKIQHEKALKTQNALFQYALKYLFKTYGVKHIGRPMPFSQKPIQYVLNKIKTGFIKDKYGLARWKKSVLFLSSHSADEFLKTVYTNFSQYRKRLVKADKSMDEKARYNFKMNVTKDKYGKHKNQLHKSWYRKGSINFLRNGASFRTITSQKLPEDSKGGIRIEDKHTDNHTFLTVADFGTVEVIEDLSELNLKDIALTKIKKLPDGSYRLQLTFSLPRKKQKSKTIQGFDWNMAGNEAFCSSDGKRIKVSDAAIKRADEYEQKINAIKSARDLEGNAHGQSKLYRKLDRRQQKLNAKRSNMLTNEYRHLVHEVVDDCDTIVVEKLDAYEMRKRGKGSAQRKGINRRLAVLKPYELMTILESLVKKQNKRF…	fig.4d
pSMC-TnpB-T5	TnpB-mediated knockout plasmid for the ADE2 gene in S. cerevisiae S288C, using the guide ADE2-5	TGGAATATCAGTTCTACCTG	MPPKKKRKVVSNEEKYGFTRQYHVLLTDKQKIQHEKALKTQNALFQYALKYLFKTYGVKHIGRPMPFSQKPIQYVLNKIKTGFIKDKYGLARWKKSVLFLSSHSADEFLKTVYTNFSQYRKRLVKADKSMDEKARYNFKMNVTKDKYGKHKNQLHKSWYRKGSINFLRNGASFRTITSQKLPEDSKGGIRIEDKHTDNHTFLTVADFGTVEVIEDLSELNLKDIALTKIKKLPDGSYRLQLTFSLPRKKQKSKTIQGFDWNMAGNEAFCSSDGKRIKVSDAAIKRADEYEQKINAIKSARDLEGNAHGQSKLYRKLDRRQQKLNAKRSNMLTNEYRHLVHEVVDDCDTIVVEKLDAYEMRKRGKGSAQRKGINRRLAVLKPYELMTILESLVKKQNKRF…	fig.4d
pSMC-G9F-T1	TnpB-G9F-mediated knockout plasmid for the ADE2 gene in S. cerevisiae S288C, using the guide ADE2-1	CTCAAATGAGCTTCAAATTG	MPPKKKRKVVSNEEKYFFTRQYHVLLTDKQKIQHEKALKTQNALFQYALKYLFKTYGVKHIGRPMPFSQKPIQYVLNKIKTGFIKDKYGLARWKKSVLFLSSHSADEFLKTVYTNFSQYRKRLVKADKSMDEKARYNFKMNVTKDKYGKHKNQLHKSWYRKGSINFLRNGASFRTITSQKLPEDSKGGIRIEDKHTDNHTFLTVADFGTVEVIEDLSELNLKDIALTKIKKLPDGSYRLQLTFSLPRKKQKSKTIQGFDWNMAGNEAFCSSDGKRIKVSDAAIKRADEYEQKINAIKSARDLEGNAHGQSKLYRKLDRRQQKLNAKRSNMLTNEYRHLVHEVVDDCDTIVVEKLDAYEMRKRGKGSAQRKGINRRLAVLKPYELMTILESLVKKQNKRF…	fig.4d
pSMC-G9F-T2	TnpB-G9F-mediated knockout plasmid for the ADE2 gene in S. cerevisiae S288C, using the guide ADE2-2	TAAATGCTCTTTTTGAATAT	MPPKKKRKVVSNEEKYFFTRQYHVLLTDKQKIQHEKALKTQNALFQYALKYLFKTYGVKHIGRPMPFSQKPIQYVLNKIKTGFIKDKYGLARWKKSVLFLSSHSADEFLKTVYTNFSQYRKRLVKADKSMDEKARYNFKMNVTKDKYGKHKNQLHKSWYRKGSINFLRNGASFRTITSQKLPEDSKGGIRIEDKHTDNHTFLTVADFGTVEVIEDLSELNLKDIALTKIKKLPDGSYRLQLTFSLPRKKQKSKTIQGFDWNMAGNEAFCSSDGKRIKVSDAAIKRADEYEQKINAIKSARDLEGNAHGQSKLYRKLDRRQQKLNAKRSNMLTNEYRHLVHEVVDDCDTIVVEKLDAYEMRKRGKGSAQRKGINRRLAVLKPYELMTILESLVKKQNKRF…	fig.4d
pSMC-G9F-T3	TnpB-G9F-mediated knockout plasmid for the ADE2 gene in S. cerevisiae S288C, using the guide ADE2-3	TGCATTTTCTGCCAACAACT	MPPKKKRKVVSNEEKYFFTRQYHVLLTDKQKIQHEKALKTQNALFQYALKYLFKTYGVKHIGRPMPFSQKPIQYVLNKIKTGFIKDKYGLARWKKSVLFLSSHSADEFLKTVYTNFSQYRKRLVKADKSMDEKARYNFKMNVTKDKYGKHKNQLHKSWYRKGSINFLRNGASFRTITSQKLPEDSKGGIRIEDKHTDNHTFLTVADFGTVEVIEDLSELNLKDIALTKIKKLPDGSYRLQLTFSLPRKKQKSKTIQGFDWNMAGNEAFCSSDGKRIKVSDAAIKRADEYEQKINAIKSARDLEGNAHGQSKLYRKLDRRQQKLNAKRSNMLTNEYRHLVHEVVDDCDTIVVEKLDAYEMRKRGKGSAQRKGINRRLAVLKPYELMTILESLVKKQNKRF…	fig.4d
pSMC-G9F-T4	TnpB-G9F-mediated knockout plasmid for the ADE2 gene in S. cerevisiae S288C, using the guide ADE2-4	GCTTGCGTCACTTCTCAATT	MPPKKKRKVVSNEEKYFFTRQYHVLLTDKQKIQHEKALKTQNALFQYALKYLFKTYGVKHIGRPMPFSQKPIQYVLNKIKTGFIKDKYGLARWKKSVLFLSSHSADEFLKTVYTNFSQYRKRLVKADKSMDEKARYNFKMNVTKDKYGKHKNQLHKSWYRKGSINFLRNGASFRTITSQKLPEDSKGGIRIEDKHTDNHTFLTVADFGTVEVIEDLSELNLKDIALTKIKKLPDGSYRLQLTFSLPRKKQKSKTIQGFDWNMAGNEAFCSSDGKRIKVSDAAIKRADEYEQKINAIKSARDLEGNAHGQSKLYRKLDRRQQKLNAKRSNMLTNEYRHLVHEVVDDCDTIVVEKLDAYEMRKRGKGSAQRKGINRRLAVLKPYELMTILESLVKKQNKRF…	fig.4d
pSMC-G9F-T5	TnpB-G9F-mediated knockout plasmid for the ADE2 gene in S. cerevisiae S288C, using the guide ADE2-5	TGGAATATCAGTTCTACCTG	MPPKKKRKVVSNEEKYFFTRQYHVLLTDKQKIQHEKALKTQNALFQYALKYLFKTYGVKHIGRPMPFSQKPIQYVLNKIKTGFIKDKYGLARWKKSVLFLSSHSADEFLKTVYTNFSQYRKRLVKADKSMDEKARYNFKMNVTKDKYGKHKNQLHKSWYRKGSINFLRNGASFRTITSQKLPEDSKGGIRIEDKHTDNHTFLTVADFGTVEVIEDLSELNLKDIALTKIKKLPDGSYRLQLTFSLPRKKQKSKTIQGFDWNMAGNEAFCSSDGKRIKVSDAAIKRADEYEQKINAIKSARDLEGNAHGQSKLYRKLDRRQQKLNAKRSNMLTNEYRHLVHEVVDDCDTIVVEKLDAYEMRKRGKGSAQRKGINRRLAVLKPYELMTILESLVKKQNKRF…	fig.4d
pSMC-E350R-T1	TnpB-E350R-mediated knockout plasmid for the ADE2 gene in S. cerevisiae S288C, using the guide ADE2-1	CTCAAATGAGCTTCAAATTG	MPPKKKRKVVSNEEKYGFTRQYHVLLTDKQKIQHEKALKTQNALFQYALKYLFKTYGVKHIGRPMPFSQKPIQYVLNKIKTGFIKDKYGLARWKKSVLFLSSHSADEFLKTVYTNFSQYRKRLVRADKSMDEKARYNFKMNVTKDKYGKHKNQLHKSWYRKGRINFLRNGASFRTITSQKLPEDSKGGIRIEDKHTDNHTFLTVADFGTVEVIEDLSELNLKDIALTKIKKLPDGSYRLQLTFSLPRKKQKSKTIQGFDWNMAGNEAFCSSDGKRIKVSDAAIKRADEYEQKINAIKSARDLEGNAHGQSKLYRKLDRRQQKLNAKRSNMLTNEYRHLVHEVVDDCDTIVVEKLDAYrMRKRGKGSAQRKGINRRLAVLKPYELMTILESLVKKQNKRF…	fig.4d
pSMC-E350R-T2	TnpB-E350R-mediated knockout plasmid for the ADE2 gene in S. cerevisiae S288C, using the guide ADE2-2	TAAATGCTCTTTTTGAATAT	MPPKKKRKVVSNEEKYGFTRQYHVLLTDKQKIQHEKALKTQNALFQYALKYLFKTYGVKHIGRPMPFSQKPIQYVLNKIKTGFIKDKYGLARWKKSVLFLSSHSADEFLKTVYTNFSQYRKRLVRADKSMDEKARYNFKMNVTKDKYGKHKNQLHKSWYRKGRINFLRNGASFRTITSQKLPEDSKGGIRIEDKHTDNHTFLTVADFGTVEVIEDLSELNLKDIALTKIKKLPDGSYRLQLTFSLPRKKQKSKTIQGFDWNMAGNEAFCSSDGKRIKVSDAAIKRADEYEQKINAIKSARDLEGNAHGQSKLYRKLDRRQQKLNAKRSNMLTNEYRHLVHEVVDDCDTIVVEKLDAYrMRKRGKGSAQRKGINRRLAVLKPYELMTILESLVKKQNKRF…	fig.4d
pSMC-E350R-T3	TnpB-E350R-mediated knockout plasmid for the ADE2 gene in S. cerevisiae S288C, using the guide ADE2-3	TGCATTTTCTGCCAACAACT	MPPKKKRKVVSNEEKYGFTRQYHVLLTDKQKIQHEKALKTQNALFQYALKYLFKTYGVKHIGRPMPFSQKPIQYVLNKIKTGFIKDKYGLARWKKSVLFLSSHSADEFLKTVYTNFSQYRKRLVRADKSMDEKARYNFKMNVTKDKYGKHKNQLHKSWYRKGRINFLRNGASFRTITSQKLPEDSKGGIRIEDKHTDNHTFLTVADFGTVEVIEDLSELNLKDIALTKIKKLPDGSYRLQLTFSLPRKKQKSKTIQGFDWNMAGNEAFCSSDGKRIKVSDAAIKRADEYEQKINAIKSARDLEGNAHGQSKLYRKLDRRQQKLNAKRSNMLTNEYRHLVHEVVDDCDTIVVEKLDAYrMRKRGKGSAQRKGINRRLAVLKPYELMTILESLVKKQNKRF…	fig.4d
pSMC-E350R-T4	TnpB-E350R-mediated knockout plasmid for the ADE2 gene in S. cerevisiae S288C, using the guide ADE2-4	GCTTGCGTCACTTCTCAATT	MPPKKKRKVVSNEEKYGFTRQYHVLLTDKQKIQHEKALKTQNALFQYALKYLFKTYGVKHIGRPMPFSQKPIQYVLNKIKTGFIKDKYGLARWKKSVLFLSSHSADEFLKTVYTNFSQYRKRLVRADKSMDEKARYNFKMNVTKDKYGKHKNQLHKSWYRKGRINFLRNGASFRTITSQKLPEDSKGGIRIEDKHTDNHTFLTVADFGTVEVIEDLSELNLKDIALTKIKKLPDGSYRLQLTFSLPRKKQKSKTIQGFDWNMAGNEAFCSSDGKRIKVSDAAIKRADEYEQKINAIKSARDLEGNAHGQSKLYRKLDRRQQKLNAKRSNMLTNEYRHLVHEVVDDCDTIVVEKLDAYrMRKRGKGSAQRKGINRRLAVLKPYELMTILESLVKKQNKRF…	fig.4d
pSMC-E350R-T5	TnpB-E350R-mediated knockout plasmid for the ADE2 gene in S. cerevisiae S288C, using the guide ADE2-5	TGGAATATCAGTTCTACCTG	MPPKKKRKVVSNEEKYGFTRQYHVLLTDKQKIQHEKALKTQNALFQYALKYLFKTYGVKHIGRPMPFSQKPIQYVLNKIKTGFIKDKYGLARWKKSVLFLSSHSADEFLKTVYTNFSQYRKRLVRADKSMDEKARYNFKMNVTKDKYGKHKNQLHKSWYRKGRINFLRNGASFRTITSQKLPEDSKGGIRIEDKHTDNHTFLTVADFGTVEVIEDLSELNLKDIALTKIKKLPDGSYRLQLTFSLPRKKQKSKTIQGFDWNMAGNEAFCSSDGKRIKVSDAAIKRADEYEQKINAIKSARDLEGNAHGQSKLYRKLDRRQQKLNAKRSNMLTNEYRHLVHEVVDDCDTIVVEKLDAYrMRKRGKGSAQRKGINRRLAVLKPYELMTILESLVKKQNKRF…	fig.4d
pSMC-G9F/E350R-T1	TnpB-G9F/E350R-mediated knockout plasmid for the ADE2 gene in S. cerevisiae S288C, using the guide ADE2-1	CTCAAATGAGCTTCAAATTG	MPPKKKRKVVSNEEKYFFTRQYHVLLTDKQKIQHEKALKTQNALFQYALKYLFKTYGVKHIGRPMPFSQKPIQYVLNKIKTGFIKDKYGLARWKKSVLFLSSHSADEFLKTVYTNFSQYRKRLVRADKSMDEKARYNFKMNVTKDKYGKHKNQLHKSWYRKGRINFLRNGASFRTITSQKLPEDSKGGIRIEDKHTDNHTFLTVADFGTVEVIEDLSELNLKDIALTKIKKLPDGSYRLQLTFSLPRKKQKSKTIQGFDWNMAGNEAFCSSDGKRIKVSDAAIKRADEYEQKINAIKSARDLEGNAHGQSKLYRKLDRRQQKLNAKRSNMLTNEYRHLVHEVVDDCDTIVVEKLDAYrMRKRGKGSAQRKGINRRLAVLKPYELMTILESLVKKQNKRF…	fig.4d
pSMC-G9F/E350R-T2	TnpB-G9F/E350R-mediated knockout plasmid for the ADE2 gene in S. cerevisiae S288C, using the guide ADE2-2	TAAATGCTCTTTTTGAATAT	MPPKKKRKVVSNEEKYFFTRQYHVLLTDKQKIQHEKALKTQNALFQYALKYLFKTYGVKHIGRPMPFSQKPIQYVLNKIKTGFIKDKYGLARWKKSVLFLSSHSADEFLKTVYTNFSQYRKRLVRADKSMDEKARYNFKMNVTKDKYGKHKNQLHKSWYRKGRINFLRNGASFRTITSQKLPEDSKGGIRIEDKHTDNHTFLTVADFGTVEVIEDLSELNLKDIALTKIKKLPDGSYRLQLTFSLPRKKQKSKTIQGFDWNMAGNEAFCSSDGKRIKVSDAAIKRADEYEQKINAIKSARDLEGNAHGQSKLYRKLDRRQQKLNAKRSNMLTNEYRHLVHEVVDDCDTIVVEKLDAYrMRKRGKGSAQRKGINRRLAVLKPYELMTILESLVKKQNKRF…	fig.4d
pSMC-G9F/E350R-T3	TnpB-G9F/E350R-mediated knockout plasmid for the ADE2 gene in S. cerevisiae S288C, using the guide ADE2-3	TGCATTTTCTGCCAACAACT	MPPKKKRKVVSNEEKYFFTRQYHVLLTDKQKIQHEKALKTQNALFQYALKYLFKTYGVKHIGRPMPFSQKPIQYVLNKIKTGFIKDKYGLARWKKSVLFLSSHSADEFLKTVYTNFSQYRKRLVRADKSMDEKARYNFKMNVTKDKYGKHKNQLHKSWYRKGRINFLRNGASFRTITSQKLPEDSKGGIRIEDKHTDNHTFLTVADFGTVEVIEDLSELNLKDIALTKIKKLPDGSYRLQLTFSLPRKKQKSKTIQGFDWNMAGNEAFCSSDGKRIKVSDAAIKRADEYEQKINAIKSARDLEGNAHGQSKLYRKLDRRQQKLNAKRSNMLTNEYRHLVHEVVDDCDTIVVEKLDAYrMRKRGKGSAQRKGINRRLAVLKPYELMTILESLVKKQNKRF…	fig.4d
pSMC-G9F/E350R-T4	TnpB-G9F/E350R-mediated knockout plasmid for the ADE2 gene in S. cerevisiae S288C, using the guide ADE2-4	GCTTGCGTCACTTCTCAATT	MPPKKKRKVVSNEEKYFFTRQYHVLLTDKQKIQHEKALKTQNALFQYALKYLFKTYGVKHIGRPMPFSQKPIQYVLNKIKTGFIKDKYGLARWKKSVLFLSSHSADEFLKTVYTNFSQYRKRLVRADKSMDEKARYNFKMNVTKDKYGKHKNQLHKSWYRKGRINFLRNGASFRTITSQKLPEDSKGGIRIEDKHTDNHTFLTVADFGTVEVIEDLSELNLKDIALTKIKKLPDGSYRLQLTFSLPRKKQKSKTIQGFDWNMAGNEAFCSSDGKRIKVSDAAIKRADEYEQKINAIKSARDLEGNAHGQSKLYRKLDRRQQKLNAKRSNMLTNEYRHLVHEVVDDCDTIVVEKLDAYrMRKRGKGSAQRKGINRRLAVLKPYELMTILESLVKKQNKRF…	fig.4d
pSMC-G9F/E350R-T5	TnpB-G9F/E350R-mediated knockout plasmid for the ADE2 gene in S. cerevisiae S288C, using the guide ADE2-5	TGGAATATCAGTTCTACCTG	MPPKKKRKVVSNEEKYFFTRQYHVLLTDKQKIQHEKALKTQNALFQYALKYLFKTYGVKHIGRPMPFSQKPIQYVLNKIKTGFIKDKYGLARWKKSVLFLSSHSADEFLKTVYTNFSQYRKRLVRADKSMDEKARYNFKMNVTKDKYGKHKNQLHKSWYRKGRINFLRNGASFRTITSQKLPEDSKGGIRIEDKHTDNHTFLTVADFGTVEVIEDLSELNLKDIALTKIKKLPDGSYRLQLTFSLPRKKQKSKTIQGFDWNMAGNEAFCSSDGKRIKVSDAAIKRADEYEQKINAIKSARDLEGNAHGQSKLYRKLDRRQQKLNAKRSNMLTNEYRHLVHEVVDDCDTIVVEKLDAYrMRKRGKGSAQRKGINRRLAVLKPYELMTILESLVKKQNKRF…	fig.4d
note：red represents NLS (Nuclear Localization Signal), green is sso7d, blue is T5, underlined part is ISLde6, orange is EXOIII, and black is linker.
donor used for S. cerevisiae editing	description	sequence(5'→3')	Figure
donor used for ADE2 deletion	L arm and R arm designed for ADE2 deletion	TTTAAGAGATATTAAATATTAGTGAGAAGCCGAGAATTTTGTAACACCAACATAACACTGACATCTTTAACAACTTTTAATTATGATACATTTCTTACGTCATGATTGATTATTACAGCTATGCTGACAAATGACTCTTGTTGCATGGCTACGAACCGGGTAATACTAAGTGATTGACTCTTGCTGACCTTTTATTAAGAACTAAATGGACAATATTATGGAGCATTTCATGTATAAATTGGTGCGTAAAATCGTTGGATCTCTCTTCTAAGTACATCCTACTATAACAATCAAGAAAAACAAGAAAATCGGACAAAACAATCAAGTATGGATTCTAGAACAGTTGGTATATTAGGAGGGGGACAATTGGGACGTATGATTGTTGAGGCAGCAAACAGG…	fig.4c, d

## Sheet: fig.5
DNA substrates	NTS sequence(5'→3')	TS sequence(5'→3')	description	figure
Linear dsDNA	5’-5'6FAM-TCTGCAAGGTAGCGCTTGATGATGAATATTAAGGACAATCACTTACACAATCTAGATGC	5'-GCATCTAGATTGTGTAAGTGATTGTCCTTAATATTCATCATCAAGCGCTACCTTGCAGA	Synthetic 59-bp DNA substrate used for TnpB in vitro cleavage and EMSA assays	fig.5b, c, e and d；figs.5a, b and c
2mm-NTS-1	5’-5'6FAM-TCTGCAAGGTAGCGCTTGATCTTGAATATTAAGGACAATCACTTACACAATCTAGATGC	5'-GCATCTAGATTGTGTAAGTGATTGTCCTTAATATTCATCATCAAGCGCTACCTTGCAGA	Synthetic 59-bp DNA substrate used for in vitro cleavage by TnpB, containing mismatches at positions 1 and 2 (CT→GA) within the target region of the NTS strand.	figs.5d
2mm-NTS-2	5’-5'6FAM-TCTGCAAGGTAGCGCTTGATGATGAAATTTAAGGACAATCACTTACACAATCTAGATGC	5'-GCATCTAGATTGTGTAAGTGATTGTCCTTAATATTCATCATCAAGCGCTACCTTGCAGA	Synthetic 59-bp DNA substrate used for in vitro cleavage by TnpB, containing mismatches at positions 7 and 8 (TA→AT) within the target region of the NTS strand.	fig.5f and fig.5e
2mm-NTS-3	5’-5'6FAM-TCTGCAAGGTAGCGCTTGATGATGAATATTAAGGACAAAGACTTACACAATCTAGATGC	5'-GCATCTAGATTGTGTAAGTGATTGTCCTTAATATTCATCATCAAGCGCTACCTTGCAGA	Synthetic 59-bp DNA substrate used for in vitro cleavage by TnpB, containing mismatches at positions 19 and 20 (TC→AG) within the target region of the NTS strand.	fig.5g and figs. 5f
plasmid	description	protein sequence	ωRNA sequence(5'-3')	guide sequence(5'→3')	figure
pET30a-ωRNA-ISLde6-G9F-10His	Plasmid for ISLde6-G9F-10His protein-RNP complex expression	MVSNEEKYFFTRQYHVLLTDKQKIQHEKALKTQNALFQYALKYLFKTYGVKHIGRPMPFSQKPIQYVLNKIKTGFIKDKYGLARWKKSVLFLSSHSADEFLKTVYTNFSQYRKRLVKADKSMDEKARYNFKMNVTKDKYGKHKNQLHKSWYRKGSINFLRNGASFRTITSQKLPEDSKGGIRIEDKHTDNHTFLTVADFGTVEVIEDLSELNLKDIALTKIKKLPDGSYRLQLTFSLPRKKQKSKTIQGFDWNMAGNEAFCSSDGKRIKVSDAAIKRADEYEQKINAIKSARDLEGNAHGQSKLYRKLDRRQQKLNAKRSNMLTNEYRHLVHEVVDDCDTIVVEKLDAYEMRKRGKGSAQRKGINRRLAVLKPYELMTILESLVKKQNKRFVKVDSFWT…		GATGAATATTAAGGACAATC	figs. 3c
pET30a-ωRNA-ISLde6-E350R-10His	Plasmid for ISLde6-E350R-10His protein-RNP complex expression	MVSNEEKYGFTRQYHVLLTDKQKIQHEKALKTQNALFQYALKYLFKTYGVKHIGRPMPFSQKPIQYVLNKIKTGFIKDKYGLARWKKSVLFLSSHSADEFLKTVYTNFSQYRKRLVKADKSMDEKARYNFKMNVTKDKYGKHKNQLHKSWYRKGSINFLRNGASFRTITSQKLPEDSKGGIRIEDKHTDNHTFLTVADFGTVEVIEDLSELNLKDIALTKIKKLPDGSYRLQLTFSLPRKKQKSKTIQGFDWNMAGNEAFCSSDGKRIKVSDAAIKRADEYEQKINAIKSARDLEGNAHGQSKLYRKLDRRQQKLNAKRSNMLTNEYRHLVHEVVDDCDTIVVEKLDAYRMRKRGKGSAQRKGINRRLAVLKPYELMTILESLVKKQNKRFVKVDSFWT…	GGCGAAACGGAACAATCGTCCTTAGCACTAGACGGTGTTATCTGCGTAATCTTCTGAGCGAGTCAAAACGAAGACGAGATGACATTGGGCAGTTGTGAAACTAACCTAAACACTCTGAGTACTTCTAAGAGTTGTCGATCTTACGTGTAATGTGTTGGGTGGCCCCCAGATTCCTGCGACTTTAGTCGTAGGAGGTTCAA	GATGAATATTAAGGACAATC	figs. 3d

## Sheet: fig.6
fig.6
plasmids	description	protein sequence	guide sequence(5'→3')	Figure
pSMC-SpCas9-T1	SpCas9 mediated knockout plasmid for the ADE2 gene in S. cerevisiae M, using the guide T1	MPPKKKRKVDKKYSIGLDIGTNSVGWAVITDEYKVPSKKFKVLGNTDRHSIKKNLIGALLFDSGETAEATRLKRTARRRYTRRKNRICYLQEIFSNEMAKVDDSFFHRLEESFLVEEDKKHERHPIFGNIVDEVAYHEKYPTIYHLRKKLVDSTDKADLRLIYLALAHMIKFRGHFLIEGDLNPDNSDVDKLFIQLVQTYNQLFEENPINASGVDAKAILSARLSKSRRLENLIAQLPGEKKNGLFGNLIALSLGLTPNFKSNFDLAEDAKLQLSKDTYDDDLDNLLAQIGDQYADLFLAAKNLSDAILLSDILRVNTEITKAPLSASMIKRYDEHHQDLTLLKALVRQQLPEKYKEIFFDQSKNGYAGYIDGGASQEEFYKFIKPILEKMDGTEELLV…	ATGTTCTGAGACGTAAGAAA	fig.6a
pSMC-SpCas9-T2	SpCas9 mediated knockout plasmid for the ADE2 gene in S. cerevisiae M, using the guide T2	MPPKKKRKVDKKYSIGLDIGTNSVGWAVITDEYKVPSKKFKVLGNTDRHSIKKNLIGALLFDSGETAEATRLKRTARRRYTRRKNRICYLQEIFSNEMAKVDDSFFHRLEESFLVEEDKKHERHPIFGNIVDEVAYHEKYPTIYHLRKKLVDSTDKADLRLIYLALAHMIKFRGHFLIEGDLNPDNSDVDKLFIQLVQTYNQLFEENPINASGVDAKAILSARLSKSRRLENLIAQLPGEKKNGLFGNLIALSLGLTPNFKSNFDLAEDAKLQLSKDTYDDDLDNLLAQIGDQYADLFLAAKNLSDAILLSDILRVNTEITKAPLSASMIKRYDEHHQDLTLLKALVRQQLPEKYKEIFFDQSKNGYAGYIDGGASQEEFYKFIKPILEKMDGTEELLV…	TTTGGCTTTGATTTTGGCAT	fig.6a
pSMC-TnpB-G9F/E350R-T1	TnpB-G9F/E350R mediated knockout plasmid for the ADE2 gene in S. cerevisiae M, using the guide T1	MPPKKKRKVVSNEEKYFFTRQYHVLLTDKQKIQHEKALKTQNALFQYALKYLFKTYGVKHIGRPMPFSQKPIQYVLNKIKTGFIKDKYGLARWKKSVLFLSSHSADEFLKTVYTNFSQYRKRLVRADKSMDEKARYNFKMNVTKDKYGKHKNQLHKSWYRKGRINFLRNGASFRTITSQKLPEDSKGGIRIEDKHTDNHTFLTVADFGTVEVIEDLSELNLKDIALTKIKKLPDGSYRLQLTFSLPRKKQKSKTIQGFDWNMAGNEAFCSSDGKRIKVSDAAIKRADEYEQKINAIKSARDLEGNAHGQSKLYRKLDRRQQKLNAKRSNMLTNEYRHLVHEVVDDCDTIVVEKLDAYrMRKRGKGSAQRKGINRRLAVLKPYELMTILESLVKKQNKRF…	GTTAGTGTCAAAAATTATAT	fig.6a
pSMC-TnpB-G9F/E350R-T2	TnpB-G9F/E350R mediated knockout plasmid for the ADE2 gene in S. cerevisiae M, using the guide T2	MPPKKKRKVVSNEEKYFFTRQYHVLLTDKQKIQHEKALKTQNALFQYALKYLFKTYGVKHIGRPMPFSQKPIQYVLNKIKTGFIKDKYGLARWKKSVLFLSSHSADEFLKTVYTNFSQYRKRLVRADKSMDEKARYNFKMNVTKDKYGKHKNQLHKSWYRKGRINFLRNGASFRTITSQKLPEDSKGGIRIEDKHTDNHTFLTVADFGTVEVIEDLSELNLKDIALTKIKKLPDGSYRLQLTFSLPRKKQKSKTIQGFDWNMAGNEAFCSSDGKRIKVSDAAIKRADEYEQKINAIKSARDLEGNAHGQSKLYRKLDRRQQKLNAKRSNMLTNEYRHLVHEVVDDCDTIVVEKLDAYrMRKRGKGSAQRKGINRRLAVLKPYELMTILESLVKKQNKRF…	TTTGGCATCGGTTCGGTTCT	fig.6a
plasmids	description	protein sequence	guide sequence(5'→3')	Figure
pSMC-TnpB-T4	Wild-typeTnpB mediated knockout plasmid for the ADE2 gene in S. cerevisiae S288C, using the guide ADE2-4	MPPKKKRKVVSNEEKYGFTRQYHVLLTDKQKIQHEKALKTQNALFQYALKYLFKTYGVKHIGRPMPFSQKPIQYVLNKIKTGFIKDKYGLARWKKSVLFLSSHSADEFLKTVYTNFSQYRKRLVKADKSMDEKARYNFKMNVTKDKYGKHKNQLHKSWYRKGSINFLRNGASFRTITSQKLPEDSKGGIRIEDKHTDNHTFLTVADFGTVEVIEDLSELNLKDIALTKIKKLPDGSYRLQLTFSLPRKKQKSKTIQGFDWNMAGNEAFCSSDGKRIKVSDAAIKRADEYEQKINAIKSARDLEGNAHGQSKLYRKLDRRQQKLNAKRSNMLTNEYRHLVHEVVDDCDTIVVEKLDAYEMRKRGKGSAQRKGINRRLAVLKPYELMTILESLVKKQNKRF…	GCTTGCGTCACTTCTCAATT	fig.6g
pSMC-TnpB-Sso7d-T4	Fusion protein TnpB-Sso7d mediated knockout plasmid for the ADE2 gene in S. cerevisiae S288C, using the guide ADE2-4	MPPKKKRKVVSNEEKYGFTRQYHVLLTDKQKIQHEKALKTQNALFQYALKYLFKTYGVKHIGRPMPFSQKPIQYVLNKIKTGFIKDKYGLARWKKSVLFLSSHSADEFLKTVYTNFSQYRKRLVKADKSMDEKARYNFKMNVTKDKYGKHKNQLHKSWYRKGSINFLRNGASFRTITSQKLPEDSKGGIRIEDKHTDNHTFLTVADFGTVEVIEDLSELNLKDIALTKIKKLPDGSYRLQLTFSLPRKKQKSKTIQGFDWNMAGNEAFCSSDGKRIKVSDAAIKRADEYEQKINAIKSARDLEGNAHGQSKLYRKLDRRQQKLNAKRSNMLTNEYRHLVHEVVDDCDTIVVEKLDAYEMRKRGKGSAQRKGINRRLAVLKPYELMTILESLVKKQNKRF…	GCTTGCGTCACTTCTCAATT	fig.6g
pSMC-Sso7d-TnpB-T4	Fusion protein Sso7d-TnpB mediated knockout plasmid for the ADE2 gene in S. cerevisiae S288C, using the guide ADE2-4	MPPKKKRKVMATVKFKYKGEEKEVDISKIKKVWRVGKMISFTYDEGGGKTGRGAVSEKDAPKELLQMLEKQKKGSVSNEEKYGFTRQYHVLLTDKQKIQHEKALKTQNALFQYALKYLFKTYGVKHIGRPMPFSQKPIQYVLNKIKTGFIKDKYGLARWKKSVLFLSSHSADEFLKTVYTNFSQYRKRLVKADKSMDEKARYNFKMNVTKDKYGKHKNQLHKSWYRKGSINFLRNGASFRTITSQKLPEDSKGGIRIEDKHTDNHTFLTVADFGTVEVIEDLSELNLKDIALTKIKKLPDGSYRLQLTFSLPRKKQKSKTIQGFDWNMAGNEAFCSSDGKRIKVSDAAIKRADEYEQKINAIKSARDLEGNAHGQSKLYRKLDRRQQKLNAKRSNMLTN…	GCTTGCGTCACTTCTCAATT	fig.6g
pSMC-Sso7d-TnpB-Sso7d-T4	Fusion protein Sso7d-TnpB-Sso7d mediated knockout plasmid for the ADE2 gene in S. cerevisiae S288C, using the guide ADE2-4	MPPKKKRKVMATVKFKYKGEEKEVDISKIKKVWRVGKMISFTYDEGGGKTGRGAVSEKDAPKELLQMLEKQKKGSVSNEEKYGFTRQYHVLLTDKQKIQHEKALKTQNALFQYALKYLFKTYGVKHIGRPMPFSQKPIQYVLNKIKTGFIKDKYGLARWKKSVLFLSSHSADEFLKTVYTNFSQYRKRLVKADKSMDEKARYNFKMNVTKDKYGKHKNQLHKSWYRKGSINFLRNGASFRTITSQKLPEDSKGGIRIEDKHTDNHTFLTVADFGTVEVIEDLSELNLKDIALTKIKKLPDGSYRLQLTFSLPRKKQKSKTIQGFDWNMAGNEAFCSSDGKRIKVSDAAIKRADEYEQKINAIKSARDLEGNAHGQSKLYRKLDRRQQKLNAKRSNMLTN…	GCTTGCGTCACTTCTCAATT	fig.6g
pSMC-TnpB-T5E-T4	Fusion protein TnpB-T5E mediated knockout plasmid for the ADE2 gene in S. cerevisiae S288C, using the guide ADE2-4	MPPKKKRKVVSNEEKYGFTRQYHVLLTDKQKIQHEKALKTQNALFQYALKYLFKTYGVKHIGRPMPFSQKPIQYVLNKIKTGFIKDKYGLARWKKSVLFLSSHSADEFLKTVYTNFSQYRKRLVKADKSMDEKARYNFKMNVTKDKYGKHKNQLHKSWYRKGSINFLRNGASFRTITSQKLPEDSKGGIRIEDKHTDNHTFLTVADFGTVEVIEDLSELNLKDIALTKIKKLPDGSYRLQLTFSLPRKKQKSKTIQGFDWNMAGNEAFCSSDGKRIKVSDAAIKRADEYEQKINAIKSARDLEGNAHGQSKLYRKLDRRQQKLNAKRSNMLTNEYRHLVHEVVDDCDTIVVEKLDAYEMRKRGKGSAQRKGINRRLAVLKPYELMTILESLVKKQNKRF…	GCTTGCGTCACTTCTCAATT	fig.6g
pSMC-T5E-TnpB-T4	Fusion protein T5E-TnpB mediated knockout plasmid for the ADE2 gene in S. cerevisiae S288C, using the guide ADE2-4	MPPKKKRKVSKSWGKFIEEEEAEMASRRNLMIVDGTNLGFRFKHNNSKKPFASSYVSTIQSLAKSYSARTTIVLGDKGKSVFRLEHLPEYKGNRDEKYAQRTEEEKALDEQFFEYLKDAFELCKTTFPTFTIRGVEADDMAAYIVKLIGHLYDHVWLISTDGDWDTLLTDKVSRFSFTTRREYHLRDMYEHHNVDDVEQFISLKAIMGDLGDNIRGVEGIGAKRGYNIIREFGNVLDIIDQLPLPGKQKYIQNLNASEELLFRNLILVDLPTYCVDAIAAVGQDVLDKFTKDILEIAEQSRADPKKKRKVGGGGSVSNEEKYGFTRQYHVLLTDKQKIQHEKALKTQNALFQYALKYLFKTYGVKHIGRPMPFSQKPIQYVLNKIKTGFIKDKYGLARW…	GCTTGCGTCACTTCTCAATT	fig.6g
pSMC-TnpB-ExoIII-T4	Fusion protein TnpB-ExoIII mediated knockout plasmid for the ADE2 gene in S. cerevisiae S288C, using the guide ADE2-4	MPPKKKRKVVSNEEKYGFTRQYHVLLTDKQKIQHEKALKTQNALFQYALKYLFKTYGVKHIGRPMPFSQKPIQYVLNKIKTGFIKDKYGLARWKKSVLFLSSHSADEFLKTVYTNFSQYRKRLVKADKSMDEKARYNFKMNVTKDKYGKHKNQLHKSWYRKGSINFLRNGASFRTITSQKLPEDSKGGIRIEDKHTDNHTFLTVADFGTVEVIEDLSELNLKDIALTKIKKLPDGSYRLQLTFSLPRKKQKSKTIQGFDWNMAGNEAFCSSDGKRIKVSDAAIKRADEYEQKINAIKSARDLEGNAHGQSKLYRKLDRRQQKLNAKRSNMLTNEYRHLVHEVVDDCDTIVVEKLDAYEMRKRGKGSAQRKGINRRLAVLKPYELMTILESLVKKQNKRF…	GCTTGCGTCACTTCTCAATT	fig.6g
pSMC-ExoIII-TnpB-T4	Fusion protein ExoIII-TnpB mediated knockout plasmid for the ADE2 gene in S. cerevisiae S288C, using the guide ADE2-4	MPPKKKRKVMKFVSFNINGLRARPHQLEAIVEKHQPDVIGLQETKVHDDMFPLEEVAKLGYNVFYHGQKGHYGVALLTKETPIAVRRGFPGDDEEAQRRIIMAEIPSLLGNVTVINGYFPQGESRDHPIKFPAKAQFYQNLQNYLETELKRDNPVLIMGDMNISPTDLDIGIGEENRKRWLRTGKCSFLPEEREWMDRLMSWGLVDTFRHANPQTADRFSWFDYRSKGFDDNRGLRIDLLLASQPLAECCVETGIDYEIRSMEKPSDHAPVWATFRRSRADPKKKRKVGGGGSVSNEEKYGFTRQYHVLLTDKQKIQHEKALKTQNALFQYALKYLFKTYGVKHIGRPMPFSQKPIQYVLNKIKTGFIKDKYGLARWKKSVLFLSSHSADEFLKTVYTN…	GCTTGCGTCACTTCTCAATT	fig.6g
plasmids	description	protein sequence	guide sequence(5'→3')	Figure
pSMC-TnpB-T5E-T1	Fusion protein TnpB-T5E-mediated knockout plasmid for the ADE2 gene in S. cerevisiae S288C, using the guide ADE2-1	MPPKKKRKVVSNEEKYGFTRQYHVLLTDKQKIQHEKALKTQNALFQYALKYLFKTYGVKHIGRPMPFSQKPIQYVLNKIKTGFIKDKYGLARWKKSVLFLSSHSADEFLKTVYTNFSQYRKRLVKADKSMDEKARYNFKMNVTKDKYGKHKNQLHKSWYRKGSINFLRNGASFRTITSQKLPEDSKGGIRIEDKHTDNHTFLTVADFGTVEVIEDLSELNLKDIALTKIKKLPDGSYRLQLTFSLPRKKQKSKTIQGFDWNMAGNEAFCSSDGKRIKVSDAAIKRADEYEQKINAIKSARDLEGNAHGQSKLYRKLDRRQQKLNAKRSNMLTNEYRHLVHEVVDDCDTIVVEKLDAYEMRKRGKGSAQRKGINRRLAVLKPYELMTILESLVKKQNKRF…	CTCAAATGAGCTTCAAATTG	fig.6h
pSMC-TnpB-T5E-T2	Fusion protein TnpB-T5E-mediated knockout plasmid for the ADE2 gene in S. cerevisiae S288C, using the guide ADE2-2	MPPKKKRKVVSNEEKYGFTRQYHVLLTDKQKIQHEKALKTQNALFQYALKYLFKTYGVKHIGRPMPFSQKPIQYVLNKIKTGFIKDKYGLARWKKSVLFLSSHSADEFLKTVYTNFSQYRKRLVKADKSMDEKARYNFKMNVTKDKYGKHKNQLHKSWYRKGSINFLRNGASFRTITSQKLPEDSKGGIRIEDKHTDNHTFLTVADFGTVEVIEDLSELNLKDIALTKIKKLPDGSYRLQLTFSLPRKKQKSKTIQGFDWNMAGNEAFCSSDGKRIKVSDAAIKRADEYEQKINAIKSARDLEGNAHGQSKLYRKLDRRQQKLNAKRSNMLTNEYRHLVHEVVDDCDTIVVEKLDAYEMRKRGKGSAQRKGINRRLAVLKPYELMTILESLVKKQNKRF…	TAAATGCTCTTTTTGAATAT	fig.6h
pSMC-TnpB-T5E-T3	Fusion protein TnpB-T5E-mediated knockout plasmid for the ADE2 gene in S. cerevisiae S288C, using the guide ADE2-3	MPPKKKRKVVSNEEKYGFTRQYHVLLTDKQKIQHEKALKTQNALFQYALKYLFKTYGVKHIGRPMPFSQKPIQYVLNKIKTGFIKDKYGLARWKKSVLFLSSHSADEFLKTVYTNFSQYRKRLVKADKSMDEKARYNFKMNVTKDKYGKHKNQLHKSWYRKGSINFLRNGASFRTITSQKLPEDSKGGIRIEDKHTDNHTFLTVADFGTVEVIEDLSELNLKDIALTKIKKLPDGSYRLQLTFSLPRKKQKSKTIQGFDWNMAGNEAFCSSDGKRIKVSDAAIKRADEYEQKINAIKSARDLEGNAHGQSKLYRKLDRRQQKLNAKRSNMLTNEYRHLVHEVVDDCDTIVVEKLDAYEMRKRGKGSAQRKGINRRLAVLKPYELMTILESLVKKQNKRF…	TGCATTTTCTGCCAACAACT	fig.6h
pSMC-TnpB-T5E-T4	Fusion protein TnpB-T5E-mediated knockout plasmid for the ADE2 gene in S. cerevisiae S288C, using the guide ADE2-4	MPPKKKRKVVSNEEKYGFTRQYHVLLTDKQKIQHEKALKTQNALFQYALKYLFKTYGVKHIGRPMPFSQKPIQYVLNKIKTGFIKDKYGLARWKKSVLFLSSHSADEFLKTVYTNFSQYRKRLVKADKSMDEKARYNFKMNVTKDKYGKHKNQLHKSWYRKGSINFLRNGASFRTITSQKLPEDSKGGIRIEDKHTDNHTFLTVADFGTVEVIEDLSELNLKDIALTKIKKLPDGSYRLQLTFSLPRKKQKSKTIQGFDWNMAGNEAFCSSDGKRIKVSDAAIKRADEYEQKINAIKSARDLEGNAHGQSKLYRKLDRRQQKLNAKRSNMLTNEYRHLVHEVVDDCDTIVVEKLDAYEMRKRGKGSAQRKGINRRLAVLKPYELMTILESLVKKQNKRF…	GCTTGCGTCACTTCTCAATT	fig.6h
pSMC-TnpB-T5E-T5	Fusion protein TnpB-T5E-mediated knockout plasmid for the ADE2 gene in S. cerevisiae S288C, using the guide ADE2-5	MPPKKKRKVVSNEEKYGFTRQYHVLLTDKQKIQHEKALKTQNALFQYALKYLFKTYGVKHIGRPMPFSQKPIQYVLNKIKTGFIKDKYGLARWKKSVLFLSSHSADEFLKTVYTNFSQYRKRLVKADKSMDEKARYNFKMNVTKDKYGKHKNQLHKSWYRKGSINFLRNGASFRTITSQKLPEDSKGGIRIEDKHTDNHTFLTVADFGTVEVIEDLSELNLKDIALTKIKKLPDGSYRLQLTFSLPRKKQKSKTIQGFDWNMAGNEAFCSSDGKRIKVSDAAIKRADEYEQKINAIKSARDLEGNAHGQSKLYRKLDRRQQKLNAKRSNMLTNEYRHLVHEVVDDCDTIVVEKLDAYEMRKRGKGSAQRKGINRRLAVLKPYELMTILESLVKKQNKRF…	TGGAATATCAGTTCTACCTG	fig.6h
pSMC-TnpB-Sso7d-T5E-T1	Fusion protein TnpB-Sso7d-T5E-mediated knockout plasmid for the ADE2 gene in S. cerevisiae S288C, using the guide ADE2-1	MPPKKKRKVVSNEEKYGFTRQYHVLLTDKQKIQHEKALKTQNALFQYALKYLFKTYGVKHIGRPMPFSQKPIQYVLNKIKTGFIKDKYGLARWKKSVLFLSSHSADEFLKTVYTNFSQYRKRLVKADKSMDEKARYNFKMNVTKDKYGKHKNQLHKSWYRKGSINFLRNGASFRTITSQKLPEDSKGGIRIEDKHTDNHTFLTVADFGTVEVIEDLSELNLKDIALTKIKKLPDGSYRLQLTFSLPRKKQKSKTIQGFDWNMAGNEAFCSSDGKRIKVSDAAIKRADEYEQKINAIKSARDLEGNAHGQSKLYRKLDRRQQKLNAKRSNMLTNEYRHLVHEVVDDCDTIVVEKLDAYEMRKRGKGSAQRKGINRRLAVLKPYELMTILESLVKKQNKRF…	CTCAAATGAGCTTCAAATTG	fig.6h
pSMC-TnpB-Sso7d-T5E-T2	Fusion protein TnpB-Sso7d-T5E-mediated knockout plasmid for the ADE2 gene in S. cerevisiae S288C, using the guide ADE2-2	MPPKKKRKVVSNEEKYGFTRQYHVLLTDKQKIQHEKALKTQNALFQYALKYLFKTYGVKHIGRPMPFSQKPIQYVLNKIKTGFIKDKYGLARWKKSVLFLSSHSADEFLKTVYTNFSQYRKRLVKADKSMDEKARYNFKMNVTKDKYGKHKNQLHKSWYRKGSINFLRNGASFRTITSQKLPEDSKGGIRIEDKHTDNHTFLTVADFGTVEVIEDLSELNLKDIALTKIKKLPDGSYRLQLTFSLPRKKQKSKTIQGFDWNMAGNEAFCSSDGKRIKVSDAAIKRADEYEQKINAIKSARDLEGNAHGQSKLYRKLDRRQQKLNAKRSNMLTNEYRHLVHEVVDDCDTIVVEKLDAYEMRKRGKGSAQRKGINRRLAVLKPYELMTILESLVKKQNKRF…	TAAATGCTCTTTTTGAATAT	fig.6h
pSMC-TnpB-Sso7d-T5E-T3	Fusion protein TnpB-Sso7d-T5E-mediated knockout plasmid for the ADE2 gene in S. cerevisiae S288C, using the guide ADE2-3	MPPKKKRKVVSNEEKYGFTRQYHVLLTDKQKIQHEKALKTQNALFQYALKYLFKTYGVKHIGRPMPFSQKPIQYVLNKIKTGFIKDKYGLARWKKSVLFLSSHSADEFLKTVYTNFSQYRKRLVKADKSMDEKARYNFKMNVTKDKYGKHKNQLHKSWYRKGSINFLRNGASFRTITSQKLPEDSKGGIRIEDKHTDNHTFLTVADFGTVEVIEDLSELNLKDIALTKIKKLPDGSYRLQLTFSLPRKKQKSKTIQGFDWNMAGNEAFCSSDGKRIKVSDAAIKRADEYEQKINAIKSARDLEGNAHGQSKLYRKLDRRQQKLNAKRSNMLTNEYRHLVHEVVDDCDTIVVEKLDAYEMRKRGKGSAQRKGINRRLAVLKPYELMTILESLVKKQNKRF…	TGCATTTTCTGCCAACAACT	fig.6h
pSMC-TnpB-Sso7d-T5E-T4	Fusion protein TnpB-Sso7d-T5E-mediated knockout plasmid for the ADE2 gene in S. cerevisiae S288C, using the guide ADE2-4	MPPKKKRKVVSNEEKYGFTRQYHVLLTDKQKIQHEKALKTQNALFQYALKYLFKTYGVKHIGRPMPFSQKPIQYVLNKIKTGFIKDKYGLARWKKSVLFLSSHSADEFLKTVYTNFSQYRKRLVKADKSMDEKARYNFKMNVTKDKYGKHKNQLHKSWYRKGSINFLRNGASFRTITSQKLPEDSKGGIRIEDKHTDNHTFLTVADFGTVEVIEDLSELNLKDIALTKIKKLPDGSYRLQLTFSLPRKKQKSKTIQGFDWNMAGNEAFCSSDGKRIKVSDAAIKRADEYEQKINAIKSARDLEGNAHGQSKLYRKLDRRQQKLNAKRSNMLTNEYRHLVHEVVDDCDTIVVEKLDAYEMRKRGKGSAQRKGINRRLAVLKPYELMTILESLVKKQNKRF…	GCTTGCGTCACTTCTCAATT	fig.6h
pSMC-TnpB-Sso7d-T5E-T5	Fusion protein TnpB-Sso7d-T5E-mediated knockout plasmid for the ADE2 gene in S. cerevisiae S288C, using the guide ADE2-5	MPPKKKRKVVSNEEKYGFTRQYHVLLTDKQKIQHEKALKTQNALFQYALKYLFKTYGVKHIGRPMPFSQKPIQYVLNKIKTGFIKDKYGLARWKKSVLFLSSHSADEFLKTVYTNFSQYRKRLVKADKSMDEKARYNFKMNVTKDKYGKHKNQLHKSWYRKGSINFLRNGASFRTITSQKLPEDSKGGIRIEDKHTDNHTFLTVADFGTVEVIEDLSELNLKDIALTKIKKLPDGSYRLQLTFSLPRKKQKSKTIQGFDWNMAGNEAFCSSDGKRIKVSDAAIKRADEYEQKINAIKSARDLEGNAHGQSKLYRKLDRRQQKLNAKRSNMLTNEYRHLVHEVVDDCDTIVVEKLDAYEMRKRGKGSAQRKGINRRLAVLKPYELMTILESLVKKQNKRF…	TGGAATATCAGTTCTACCTG	fig.6h
pSMC-TnpB-T5E-Sso7d-T1	Fusion protein TnpB-T5E-Sso7d-mediated knockout plasmid for the ADE2 gene in S. cerevisiae S288C, using the guide ADE2-1	MPPKKKRKVVSNEEKYGFTRQYHVLLTDKQKIQHEKALKTQNALFQYALKYLFKTYGVKHIGRPMPFSQKPIQYVLNKIKTGFIKDKYGLARWKKSVLFLSSHSADEFLKTVYTNFSQYRKRLVKADKSMDEKARYNFKMNVTKDKYGKHKNQLHKSWYRKGSINFLRNGASFRTITSQKLPEDSKGGIRIEDKHTDNHTFLTVADFGTVEVIEDLSELNLKDIALTKIKKLPDGSYRLQLTFSLPRKKQKSKTIQGFDWNMAGNEAFCSSDGKRIKVSDAAIKRADEYEQKINAIKSARDLEGNAHGQSKLYRKLDRRQQKLNAKRSNMLTNEYRHLVHEVVDDCDTIVVEKLDAYEMRKRGKGSAQRKGINRRLAVLKPYELMTILESLVKKQNKRF…	CTCAAATGAGCTTCAAATTG	fig.6h
pSMC-TnpB-T5E-Sso7d-T2	Fusion protein TnpB-T5E-Sso7d-mediated knockout plasmid for the ADE2 gene in S. cerevisiae S288C, using the guide ADE2-2	MPPKKKRKVVSNEEKYGFTRQYHVLLTDKQKIQHEKALKTQNALFQYALKYLFKTYGVKHIGRPMPFSQKPIQYVLNKIKTGFIKDKYGLARWKKSVLFLSSHSADEFLKTVYTNFSQYRKRLVKADKSMDEKARYNFKMNVTKDKYGKHKNQLHKSWYRKGSINFLRNGASFRTITSQKLPEDSKGGIRIEDKHTDNHTFLTVADFGTVEVIEDLSELNLKDIALTKIKKLPDGSYRLQLTFSLPRKKQKSKTIQGFDWNMAGNEAFCSSDGKRIKVSDAAIKRADEYEQKINAIKSARDLEGNAHGQSKLYRKLDRRQQKLNAKRSNMLTNEYRHLVHEVVDDCDTIVVEKLDAYEMRKRGKGSAQRKGINRRLAVLKPYELMTILESLVKKQNKRF…	TAAATGCTCTTTTTGAATAT	fig.6h
pSMC-TnpB-T5E-Sso7d-T3	Fusion protein TnpB-T5E-Sso7d-mediated knockout plasmid for the ADE2 gene in S. cerevisiae S288C, using the guide ADE2-3	MPPKKKRKVVSNEEKYGFTRQYHVLLTDKQKIQHEKALKTQNALFQYALKYLFKTYGVKHIGRPMPFSQKPIQYVLNKIKTGFIKDKYGLARWKKSVLFLSSHSADEFLKTVYTNFSQYRKRLVKADKSMDEKARYNFKMNVTKDKYGKHKNQLHKSWYRKGSINFLRNGASFRTITSQKLPEDSKGGIRIEDKHTDNHTFLTVADFGTVEVIEDLSELNLKDIALTKIKKLPDGSYRLQLTFSLPRKKQKSKTIQGFDWNMAGNEAFCSSDGKRIKVSDAAIKRADEYEQKINAIKSARDLEGNAHGQSKLYRKLDRRQQKLNAKRSNMLTNEYRHLVHEVVDDCDTIVVEKLDAYEMRKRGKGSAQRKGINRRLAVLKPYELMTILESLVKKQNKRF…	TGCATTTTCTGCCAACAACT	fig.6h
pSMC-TnpB-T5E-Sso7d-T4	Fusion protein TnpB-T5E-Sso7d-mediated knockout plasmid for the ADE2 gene in S. cerevisiae S288C, using the guide ADE2-4	MPPKKKRKVVSNEEKYGFTRQYHVLLTDKQKIQHEKALKTQNALFQYALKYLFKTYGVKHIGRPMPFSQKPIQYVLNKIKTGFIKDKYGLARWKKSVLFLSSHSADEFLKTVYTNFSQYRKRLVKADKSMDEKARYNFKMNVTKDKYGKHKNQLHKSWYRKGSINFLRNGASFRTITSQKLPEDSKGGIRIEDKHTDNHTFLTVADFGTVEVIEDLSELNLKDIALTKIKKLPDGSYRLQLTFSLPRKKQKSKTIQGFDWNMAGNEAFCSSDGKRIKVSDAAIKRADEYEQKINAIKSARDLEGNAHGQSKLYRKLDRRQQKLNAKRSNMLTNEYRHLVHEVVDDCDTIVVEKLDAYEMRKRGKGSAQRKGINRRLAVLKPYELMTILESLVKKQNKRF…	GCTTGCGTCACTTCTCAATT	fig.6h
pSMC-TnpB-T5E-Sso7d-T5	Fusion protein TnpB-T5E-Sso7d-mediated knockout plasmid for the ADE2 gene in S. cerevisiae S288C, using the guide ADE2-5	MPPKKKRKVVSNEEKYGFTRQYHVLLTDKQKIQHEKALKTQNALFQYALKYLFKTYGVKHIGRPMPFSQKPIQYVLNKIKTGFIKDKYGLARWKKSVLFLSSHSADEFLKTVYTNFSQYRKRLVKADKSMDEKARYNFKMNVTKDKYGKHKNQLHKSWYRKGSINFLRNGASFRTITSQKLPEDSKGGIRIEDKHTDNHTFLTVADFGTVEVIEDLSELNLKDIALTKIKKLPDGSYRLQLTFSLPRKKQKSKTIQGFDWNMAGNEAFCSSDGKRIKVSDAAIKRADEYEQKINAIKSARDLEGNAHGQSKLYRKLDRRQQKLNAKRSNMLTNEYRHLVHEVVDDCDTIVVEKLDAYEMRKRGKGSAQRKGINRRLAVLKPYELMTILESLVKKQNKRF…	TGGAATATCAGTTCTACCTG	fig.6h
plasmids	description	protein sequence	guide sequence(5'→3')	Figure
pSMC-SpCas9-NTS1	SpCas9-mediated integration plasmid for the integration of astaxanthin metabolic pathway in S. cerevisiae M, using the guide NTS-T1	MPPKKKRKVDKKYSIGLDIGTNSVGWAVITDEYKVPSKKFKVLGNTDRHSIKKNLIGALLFDSGETAEATRLKRTARRRYTRRKNRICYLQEIFSNEMAKVDDSFFHRLEESFLVEEDKKHERHPIFGNIVDEVAYHEKYPTIYHLRKKLVDSTDKADLRLIYLALAHMIKFRGHFLIEGDLNPDNSDVDKLFIQLVQTYNQLFEENPINASGVDAKAILSARLSKSRRLENLIAQLPGEKKNGLFGNLIALSLGLTPNFKSNFDLAEDAKLQLSKDTYDDDLDNLLAQIGDQYADLFLAAKNLSDAILLSDILRVNTEITKAPLSASMIKRYDEHHQDLTLLKALVRQQLPEKYKEIFFDQSKNGYAGYIDGGASQEEFYKFIKPILEKMDGTEELLV…	AGTATTTTTTTCATATCAA	fig.6i
pSMC-SpCas9-NTS2	SpCas9-mediated integration plasmid for the integration of astaxanthin metabolic pathway in S. cerevisiae M, using the guide NTS-T2	MPPKKKRKVDKKYSIGLDIGTNSVGWAVITDEYKVPSKKFKVLGNTDRHSIKKNLIGALLFDSGETAEATRLKRTARRRYTRRKNRICYLQEIFSNEMAKVDDSFFHRLEESFLVEEDKKHERHPIFGNIVDEVAYHEKYPTIYHLRKKLVDSTDKADLRLIYLALAHMIKFRGHFLIEGDLNPDNSDVDKLFIQLVQTYNQLFEENPINASGVDAKAILSARLSKSRRLENLIAQLPGEKKNGLFGNLIALSLGLTPNFKSNFDLAEDAKLQLSKDTYDDDLDNLLAQIGDQYADLFLAAKNLSDAILLSDILRVNTEITKAPLSASMIKRYDEHHQDLTLLKALVRQQLPEKYKEIFFDQSKNGYAGYIDGGASQEEFYKFIKPILEKMDGTEELLV…	TCGGAGGAGAATATCGGAGG	fig.6i
pSMC-SpCas9-NTS3	SpCas9-mediated integration plasmid for the integration of astaxanthin metabolic pathway in S. cerevisiae M, using the guide NTS-T3	MPPKKKRKVDKKYSIGLDIGTNSVGWAVITDEYKVPSKKFKVLGNTDRHSIKKNLIGALLFDSGETAEATRLKRTARRRYTRRKNRICYLQEIFSNEMAKVDDSFFHRLEESFLVEEDKKHERHPIFGNIVDEVAYHEKYPTIYHLRKKLVDSTDKADLRLIYLALAHMIKFRGHFLIEGDLNPDNSDVDKLFIQLVQTYNQLFEENPINASGVDAKAILSARLSKSRRLENLIAQLPGEKKNGLFGNLIALSLGLTPNFKSNFDLAEDAKLQLSKDTYDDDLDNLLAQIGDQYADLFLAAKNLSDAILLSDILRVNTEITKAPLSASMIKRYDEHHQDLTLLKALVRQQLPEKYKEIFFDQSKNGYAGYIDGGASQEEFYKFIKPILEKMDGTEELLV…	GATGATGGCAAGTTGCAGAG	fig.6i
pSMC-TnpB-G9F/E350R-NTS1	TnpB-G9F/E350R-mediated integration plasmid for the integration of astaxanthin metabolic pathway in S. cerevisiae M, using the guide NTS-T1	MPPKKKRKVVSNEEKYFFTRQYHVLLTDKQKIQHEKALKTQNALFQYALKYLFKTYGVKHIGRPMPFSQKPIQYVLNKIKTGFIKDKYGLARWKKSVLFLSSHSADEFLKTVYTNFSQYRKRLVRADKSMDEKARYNFKMNVTKDKYGKHKNQLHKSWYRKGRINFLRNGASFRTITSQKLPEDSKGGIRIEDKHTDNHTFLTVADFGTVEVIEDLSELNLKDIALTKIKKLPDGSYRLQLTFSLPRKKQKSKTIQGFDWNMAGNEAFCSSDGKRIKVSDAAIKRADEYEQKINAIKSARDLEGNAHGQSKLYRKLDRRQQKLNAKRSNMLTNEYRHLVHEVVDDCDTIVVEKLDAYrMRKRGKGSAQRKGINRRLAVLKPYELMTILESLVKKQNKRF…	ATGAAAAAAATACTACGAA	fig.6i
pSMC-TnpB-G9F/E350R-NTS2	TnpB-G9F/E350R-mediated integration plasmid for the integration of astaxanthin metabolic pathway in S. cerevisiae M, using the guide NTS-T2	MPPKKKRKVVSNEEKYFFTRQYHVLLTDKQKIQHEKALKTQNALFQYALKYLFKTYGVKHIGRPMPFSQKPIQYVLNKIKTGFIKDKYGLARWKKSVLFLSSHSADEFLKTVYTNFSQYRKRLVRADKSMDEKARYNFKMNVTKDKYGKHKNQLHKSWYRKGRINFLRNGASFRTITSQKLPEDSKGGIRIEDKHTDNHTFLTVADFGTVEVIEDLSELNLKDIALTKIKKLPDGSYRLQLTFSLPRKKQKSKTIQGFDWNMAGNEAFCSSDGKRIKVSDAAIKRADEYEQKINAIKSARDLEGNAHGQSKLYRKLDRRQQKLNAKRSNMLTNEYRHLVHEVVDDCDTIVVEKLDAYrMRKRGKGSAQRKGINRRLAVLKPYELMTILESLVKKQNKRF…	ATGTACAAACAATATCCTCC	fig.6i
pSMC-TnpB-G9F/E350R-NTS3	TnpB-G9F/E350R-mediated integration plasmid for the integration of astaxanthin metabolic pathway in S. cerevisiae M, using the guide NTS-T3	MPPKKKRKVVSNEEKYFFTRQYHVLLTDKQKIQHEKALKTQNALFQYALKYLFKTYGVKHIGRPMPFSQKPIQYVLNKIKTGFIKDKYGLARWKKSVLFLSSHSADEFLKTVYTNFSQYRKRLVRADKSMDEKARYNFKMNVTKDKYGKHKNQLHKSWYRKGRINFLRNGASFRTITSQKLPEDSKGGIRIEDKHTDNHTFLTVADFGTVEVIEDLSELNLKDIALTKIKKLPDGSYRLQLTFSLPRKKQKSKTIQGFDWNMAGNEAFCSSDGKRIKVSDAAIKRADEYEQKINAIKSARDLEGNAHGQSKLYRKLDRRQQKLNAKRSNMLTNEYRHLVHEVVDDCDTIVVEKLDAYrMRKRGKGSAQRKGINRRLAVLKPYELMTILESLVKKQNKRF…	GATGGCAAGTTGCAGAGAGG	fig.6i
pSMC-FIRE-TnpB-NTS1	Fusion protein FIRE-TnpB-mediated integration plasmid for the integration of astaxanthin metabolic pathway in S. cerevisiae M, using the guide NTS-T1	MPPKKKRKVVSNEEKYFFTRQYHVLLTDKQKIQHEKALKTQNALFQYALKYLFKTYGVKHIGRPMPFSQKPIQYVLNKIKTGFIKDKYGLARWKKSVLFLSSHSADEFLKTVYTNFSQYRKRLVKADKSMDEKARYNFKMNVTKDKYGKHKNQLHKSWYRKGSINFLRNGASFRTITSQKLPEDSKGGIRIEDKHTDNHTFLTVADFGTVEVIEDLSELNLKDIALTKIKKLPDGSYRLQLTFSLPRKKQKSKTIQGFDWNMAGNEAFCSSDGKRIKVSDAAIKRADEYEQKINAIKSARDLEGNAHGQSKLYRKLDRRQQKLNAKRSNMLTNEYRHLVHEVVDDCDTIVVEKLDAYRMRKRGKGSAQRKGINRRLAVLKPYELMTILESLVKKQNKRF…	ATGAAAAAAATACTACGAA	fig.6i
pSMC-FIRE-TnpB-NTS2	Fusion protein FIRE-TnpB-mediated integration plasmid for the integration of astaxanthin metabolic pathway in S. cerevisiae M, using the guide NTS-T2	MPPKKKRKVVSNEEKYFFTRQYHVLLTDKQKIQHEKALKTQNALFQYALKYLFKTYGVKHIGRPMPFSQKPIQYVLNKIKTGFIKDKYGLARWKKSVLFLSSHSADEFLKTVYTNFSQYRKRLVKADKSMDEKARYNFKMNVTKDKYGKHKNQLHKSWYRKGSINFLRNGASFRTITSQKLPEDSKGGIRIEDKHTDNHTFLTVADFGTVEVIEDLSELNLKDIALTKIKKLPDGSYRLQLTFSLPRKKQKSKTIQGFDWNMAGNEAFCSSDGKRIKVSDAAIKRADEYEQKINAIKSARDLEGNAHGQSKLYRKLDRRQQKLNAKRSNMLTNEYRHLVHEVVDDCDTIVVEKLDAYRMRKRGKGSAQRKGINRRLAVLKPYELMTILESLVKKQNKRF…	ATGTACAAACAATATCCTCC	fig.6i
pSMC-FIRE-TnpB-NTS3	Fusion protein FIRE-TnpB-mediated integration plasmid for the integration of astaxanthin metabolic pathway in S. cerevisiae M, using the guide NTS-T3	MPPKKKRKVVSNEEKYFFTRQYHVLLTDKQKIQHEKALKTQNALFQYALKYLFKTYGVKHIGRPMPFSQKPIQYVLNKIKTGFIKDKYGLARWKKSVLFLSSHSADEFLKTVYTNFSQYRKRLVKADKSMDEKARYNFKMNVTKDKYGKHKNQLHKSWYRKGSINFLRNGASFRTITSQKLPEDSKGGIRIEDKHTDNHTFLTVADFGTVEVIEDLSELNLKDIALTKIKKLPDGSYRLQLTFSLPRKKQKSKTIQGFDWNMAGNEAFCSSDGKRIKVSDAAIKRADEYEQKINAIKSARDLEGNAHGQSKLYRKLDRRQQKLNAKRSNMLTNEYRHLVHEVVDDCDTIVVEKLDAYRMRKRGKGSAQRKGINRRLAVLKPYELMTILESLVKKQNKRF…	GATGGCAAGTTGCAGAGAGG	fig.6i
donor used for S. cerevisiae editing	description	sequence(5'→3')	Figure
donor used for ADE2 deletion	L arm and R arm designed for ADE2 deletion in S. cerevisiae	TTTAAGAGATATTAAATATTAGTGAGAAGCCGAGAATTTTGTAACACCAACATAACACTGACATCTTTAACAACTTTTAATTATGATACATTTCTTACGTCATGATTGATTATTACAGCTATGCTGACAAATGACTCTTGTTGCATGGCTACGAACCGGGTAATACTAAGTGATTGACTCTTGCTGACCTTTTATTAAGAACTAAATGGACAATATTATGGAGCATTTCATGTATAAATTGGTGCGTAAAATCGTTGGATCTCTCTTCTAAGTACATCCTACTATAACAATCAAGAAAAACAAGAAAATCGGACAAAACAATCAAGTATGGATTCTAGAACAGTTGGTATATTAGGAGGGGGACAATTGGGACGTATGATTGTTGAGGCAGCAAACAGG…	fig.6g, h
donor used for GlcA integration	Larm+ pPDC1t-GlcA-terminator+R arm designed for GlcA integration in S. cerevisiae M	AGAATAGTTTTTGTGCATCTATGTAATATAATACGGTTGAATTATCCTTTTATAATGATGACTATTTAATTATTATATGATTAAACAAAAAAAAGAAGAAGACAAACAACTTATTACCTTATTTCTTGATTTTATATTTATTCGGAAGCAGCAGCTCTGGTATAGATAGCTTGCTTGGAATGCTTCGAGATTGGCTTGATGATACCTTCCTTTTCCAAGTGCCTCAAAGCAATTCTGGCAAGAGAACCACCAATCTTTAATCTATCAACCAAAACGGAAACAGAGACGTATCTGTAAGTTGGAACCTCCTTCAAGATTCTGTCGTATTTTTCTTGATCCAAAATAACAGCGTGTTGAGCTCTGTCCTTCATGGACTTTTTGGACCACTTCTTCTTGGAC…	fig.6a
donor used for astaxanthin synthetic pathway integration	designed for astaxanthin synthetic pathway integration in S. cerevisiae M, consist of three fragement: L arm+pTEF-crtE-terminator-pPGK-crtYB-terminator-pTDH3；pTDH3-crtI-terminator-pENO2；pENO2-crtZ-terminator-pADH1-crtW-R arm	TGCCTGCCACCATCCATTTGTCTTTTGCACCATATCTTCATAACCTGTCACCTTGAAACTACCTCTGCATGCCACCTACCGACCAACTTTCATGTTCTGTTTCGACCTACCTCTTGTAAATGACAAATCACCTTTTTCATCGTATGCACCTTATTCTCCACATCACAATGCACTATTGCTTTTGCTTTTTCACCTGTCATATCCTATTGCTATTAGATGAAATATAATAAAAATTGTCCTCCACCCATAACACCTCTCACTCCCACCTACTGAACATGTCTGGACCCTGCCCTCATATCACCTGCGTTTCCGTTAAACTATCGGTTGCGGCCATATCTACCAGAAAGCACCGTTTCCCGTCCGATCAACTGTAGTTAAGCTGGTAAGAGCCTGACCGAG…	fig.6i
note：red represents NLS (Nuclear Localization Signal), green is sso7d, blue is T5, underlined part is ISLde6, orange is EXOIII, and black is linker.

## Sheet: figs.1 and 2
figs.1 and 2
TnpBs	protein sequences		figure
ISDra2	MIRNKAFVVRLYPNAAQTELINRTLGSARFVYNHFLARRIAAYKESGKGLTYGQTSSELTLLKQAEETSWLSEVDKFALQNSLKNLETAYKNFFRTVKQSGKKVGFPRFRKKRTGESYRTQFTNNNIQIGEGRLKLPKLGWVKTKGQQDIQGKILNVTVRRIHEGHYEASVLCEVEIPYLPAAPKFAAGVDVGIKDFAIVTDGVRFKHEQNPKYYRSTLKRLRKAQQTLSRRKKGSARYGKAKTKLARIHKRIVNKRQDFLHKLTTSLVREYEIIGTEHLKPDNMRKNRRLALSISDAGWGEFIRQLEYKAAWYGRLVSKVSPYFPSSQLCHDCGFKNPEVKNLAVRTWTCPNCGETHDRDENAALNIRREALVAAGISDTLNAHGGYVRPASAGNGLR…		figs.1c and 2a
ISAba30	MKRLQAFKYEMVPNGQQERQMRRFAGSCRFVYNKALALQKERYERGEKKLGYAGLCKLLTEWRNSSEMAWLADAPVHPLQQTLKDLERAYSNFFAKRADFPRFKKKGCHSSFRYPDPKQIKLEQHNSRIFLPKLGWIRYRKSRDVLGAVKNVTVSLSGGKWFVSIQTEREVEQPIPQGGAVGIDMGIARFATISDGKFYAPLNSFKRHEKRLRCAQQALSRKVKFSNNWQKAKARIQRIHSRIGNARRDFLHKTSTAISQNHAMVCIEDLQVRNMSKSAAGTPEQPGRNVRAKSGLNKSILDQGWFEFRRQLDYKLAWNGGWLVAVPPKNTSRTCPCCAHVSADNRQTQERFECIECGFEGNADVVGAINVLRAGHARLACEVSDAVGSPAAGTHRSDS…		figs.1c and 2a
ISAco	MLLSLTVKAKIKLDNAADAAKFQETTEQYRSACNHVSEYIFNNNFELSAIKIQKKLYQDLRQCFGLKSQLAISAIKTTVARYKTVQTQLRRKPMAYATGKKDKKGKEIYLKVPRDLHWLWKPIYFQRPQADLVRNRDWSIVANGEKLSINTLQGRVKARFVLKTGFEQYLDGTWEFGGAKLIKSGTNWFLYIAVNKEFPELTRNDMQHVVGLDRGIRQLVTAYDDQGKTTFFNGQAINRKRRHYKALRASLQRHNTRNSKRRIRQMGNKENRWMTDINHQLSKTLVAKYGPNTLFVLEDLVNVRFATEKTTKDTRYEKVSWAFYQLEQLLTYKAIQAGAAVITVSAAYTSQRCPACGEIKKTNRKHQLHAYQCSNCGYQSNDDRVGAMNIQFLGTQYIA…		figs.1c and 2a
ISCal	MDSHLFLSFLLLPEHTFWYTYVTKMVNDLKSMSELEYHYGIKVRIYPSYKQKELIKLNSNISRAIYNKLVGIDRKVYHLSKIGLPIKIVQTRIDELKRRKKIRELANHYQYMEDKRIDSLAKANAVQNYLKAWQMFREVHKAGVPRFHKKGYFEKYQTNCQYPKKSKMNIYSGSVRFLDNKHIQIPKLGKLRIKGQHKRIFDHKTDIRIGTVTVSKDACNRYFVSLQLGSDTPFVSEKIKTGTSIGIDLNTENFLTTSNNIVFSNPRFYRRIKKKLAKEQRILSRRGTRAKAEKRKLRTSKNYQKQRLLVSQLRTKIKNQRHNFLNKLSTTLINNHDLVVAEELRSSNLLKNHALAMSISDVGWRTFLSMLTYKADLYGKTFITINPKNTTQTCSTCGH…		figs.1c and 2a
ISCfu	MKKNEMEYMMGLKMRIYPNRRQEEIFWKNINASRFVYNKLVANSWTDSPIYSNKLDKLFPIPEEYWKYNKNGKLLKASTVRPTGLARITKDKYPWLSDKDIDSDMLSKAEMSYKSAWNLFHKVHKSGTPNFKRKSNPNQGYRTSNHYSSNTIKKDGGVPSLYNGSIKFLDNKHIRLPKVGRIKVKLSKRLPNNQLVRIATVSIKHLPTGEWFVSFLLKSDEPFKEQLPKTNSQVGYDLNTENFLTDSYGNTIDNPRFYRSIKGRLAKEQRKLSRRARRAKSEGRKLWKSKNYQKQRKLVAKLHAKVRNQRKDFLHNLSTTLIKNHDLVVGENLKSKNMLKNHALAMSISDVGWRTFIGMLEYKAPMYGRIFIEIDPAYTTQQCSECKFRMGTNNTRKLT…		figs.1c and 2a
ISCfu2	MVLKGIKLRIYPDSYQKGLIEYNFGANRFVWNNMLDMMIKRHENNPDLKSLKAFDLNYILTIFKKEHTWLKKAESTSLQVSNKDLFEAYKGFFSKKRKFPRFKSKKFPKQSYQCKFVNNNIEILDDSYIKLPKLGVMKYKNKKAIPSIIKYVTIRKSSTNKYYAILTVDEEIVQLPKTNKSVGLDMGVCDLVICSDGSEYKTIRFDKKLSPKKHYWEKRLARRRAQALKDIQYKKKFGLIDPKPLEQYSNYMKAKLMVAKYSEKIANQRKNYLHKITRELVENNDLIVIEDLKTKNLLGNHKLSRAITNQSWRALRLMLEYKCEWYGKKLLVVNPFKTSQICSNCGYDDGKHKLDIREWDCPSCGIHHDRDINASKNILNNGLEQALVK		figs.1c and 2a
ISCsp	MSKTMSELPFHYGLKMKCYPSFKQKQVIELNINASRFAYNEMVAIDKELYMLSRCKLPIKQVTDRIAYLKQRKSTKYIFGLHTWLGANKVGTDVVNMSKRTYQTSWNLFRKVHSHGTPNFHKKRYGGSFQLPNRYSSKVTPNMLNGNIKFLDNKHIRIAPLGTIRVSGSQKRLLQRNQNIRIGTVTVSKDSIGNYYISMQLGSNQPFVDKPAKTSSSIGIDLNTDNFLTDSNGDTIGNPRYYRRIQGKLAKAQRKLSLRQVRAKKEHRKLIDSKNYQKQRLLVSKLQKSVMNQRSNFLNNLSTTLIKNHDLVVAEDLSSKNMLKNHALAMSISDVGWRTFLKQLEYKAMLYGKTFVKINPYNTTQTCSDCGYLMKDNEHLTLKDRKWTCPNCNTFHIRD…		figs.1c and 2a
ISDge10	MTTHRKVYRYRIEPTPVQESKLYMLAGSRRFVFNWALARRREHYAETGKTLGYNAQAGELTALKNQEETSWLKESDSQLLQQALKDVERAFVNFFEKRARFPRFKSKKTDTPRFRIPQRVRIEGSRVYVPKVGWVKLRKSQEIEGKTKSATFKREADGHWYVLLVSEFEMPDVPLPPVPESEVVGIDLGLKDFYVLSDGGRKEAPRFARKGQRKLRRAARRHSKCTRGSNRKAKAKRKLARVHRQIANQRKDFVHKATSGLVQQYQGFCIENLSIKGMAKTKLSKSVLDAALGEFRRQLAYKAQWHRKWLAVIDRWFPSSKLCGECGSINADLTLSDREWTCECGAVHDRDLNAARNIKREGLSQIVVAGHAETLNARGEGVRPAIAGSPR		figs.1c and 2a
ISLac	MAFKTKLAEHEIQLGTRQYRIYPEGEQIAWIWQLFGANRFVWNQFVATFEARYEANPELKFPKISVLKSWLPLMRKEHEWLKRVNSTSLQFTVERFSDAMWAFLTKKQIKQGKPRFKSRKYYSQTATIKNVKYQTKTGAQAQIAVLSPHHLRIGKKNGITLRTSSLNNLRNVRIQKAIISYRQDLDRYYISFSVVKDKRQLAQYQVKSKKTGKSVGIDVGLGKEWLVTSDGKRFGVPATFKLGKAMLKRQSHCDRNRTAIEKRVARFNQSHKEAKIDKYDYANWQKLRKTKSKYQLKIRNIRYDYLQKVTTELVKSYDVIVIEDLKIKNLLGNHKLAHNIANASWGMFRRLLAYKCEWYGKKLIVVKPQYTSRICSECGKKNPRFAHMKTRDWLAIREW…		figs.1c and 2a
ISLac2	MIKTQVVKLKVNKTMQKHLDALCDYRRYCWNKGLETWQLMYEAHTLNKKDNPSPNERRVRDELVANKADWQYDLSARCLQLAIKDLANAWKNFFDKSQPDWGIPSFKSKKAPRQGFKTDRAKIVNGRLRLDRPRSISKADWFDLKSYEALKMNEVKVISIFKEKGAYYAALTYEEEPISKTKTHQKTAVDVNVGHFNYTDGKINVLPAKLQKLYKRIKHYQRMLARKREVNGKLATKSNNYFAVRTKLQRDYRKVANIQNDLLQQFTTKLVDNYDQIVIEDLAVKQMMMTHVASKGMQRSLFSRFRQILTYKCNWYGKELILADKTYPSTQRCAACGYVKKGEEKITLQGNKKHGTKHNEYICYECGYKNDRDKNAVLNLLALAR		figs.1c and 2a
ISLag	MDWSYLSSGQLSINTLDGRVKVNPICHGFDQYFDGTWSFGLAKLLKTGGKWYLHISATKTVADFDNQTVKHVVGIDRGLRFLATTYDEQGQTAFFDGKAVMRKRAKYQKLRAKLQAKGTKSAKRRLKKLSGRENRWMTDVNHRLSKTLVQKFGSNTLFVLEDLTGVSFERTDLPKALRNQNKSWAFYQLAQFLTYKAHLNNSEVIEVSAKYTSQRCPKCGTIKKTNRNHDLHEYHCSNCGYRSNDDRLGAMNIQLLGTQYISGQEQPKFELTTNA		figs.1c and 2a
ISLag2	MAKLLKTGGKWYLHISATKTVADFDNQTVKHVVGIDRGLRFLATTYDEQGQTAFFDGKIVMRKRAKYQKLRAKLQAKGTKSAKRRLKKLSGRENRWMTDVNHRLSKTLVQKFGSNTLFVLEDLTGVSFERTDLPKVLRNQNKSWAFYQLAQFLTYKAHLNNSEVIEVSAQYTSQRCPKCGTIKKSNRNHDLHEYYCTNCDYRSNDDRLGAMNIQLLGTQYISGQEQPKFELTTNA		figs.1c and 2a
ISLag3	METQVIVKVKLNLANAEIASSFTNTMEQYRLACNYVSEYIFNYDFDMKQSRLNKSLYTNLRSLFMLKSQMAQSVIRTVIARYKTVKTQMKRNPYKYQDINTGEWYRETRDLTWLKKPITFNRPQVDLQRNRDWSYLSSGQLSINTLNGRVKVNPVCHGFDQYFDGTWKFGLAKLLKTGGKWYLHISATKTVANFDNQTVKHVVGIDRGLRFLATTYDEQGQTAFFDGKAVMRKRAKYQKLRAKLQAKGTKSAKRRLKKLSGRENRWMTDVNHQLSKTLVQKFGANTLFFLEDLTGVSFERTDLPKALRNQNKSWAFYQLAQFLTYKAHLNNSEVIEVSAQYTSQRCPKCGTIKKSNRNYDLHEYHCTNCDYRSNDDRLGAMNIQLLGTQYISGQEQPKF…		figs.1c and 2a
ISLag4	MLRVQKVRLYPNETMKQVLDDLCDYRRYCWNQGLALWNDMYDVSLILGDKKLRPSARKVRDELVANKEDWQYQLSARCLQLAISDLGKAWSNFFKKSLPDWGKPKFKSKKTARQGFKTDRAQIVNGKLRLDKPPGVKAWADISFKGADDLNGDLKVVSIYRENGKYWASLPFEFKVTKQTKTGQKTAVDVNVGHFDYTEGQVKTLPNSLKTLYKRIKHYQRLLARKRVANGKKATQANNYVKTRAKLQRDYRKVANIQHDIVQKFTTMLVNNYDRIAIEDLAVKQMQMSHIASKGLHRSMFGYFKQVLKYKCEWYGKELILADRYYPSTQRCSQCGHVKVGADRVGLDGNKKHGTKHNEYVCYECGAVMERDENAVRNLLALL		figs.1c and 2a
ISLam	MKRMSSLAYHFGVKLRFYPSSKQKKIIKLNYDAQRFVYNSYVGRNRSNYHAKHYLAVRQYQAMPFAFSILNNYETRLAEEVVTNSELLDKPRNIRDTYSFLRVKEIDSLAIANAIQNYQKAWNNYRKIGHGIPTFHKKRSDWSYQTNCQYPKQSEAYLDNGTARFIDAKHIKLPKLGIVRIAGFRKLIKERLLKQIPTRIGTVTIKKTADDQFYLSMQLGSDTAFVKELPKTQSQIGIDLNLDNFLTASNGAMVANPRFYRKTKKKLAHAQRVLSRRQRRAKKEGRNLRTAKNYQKQRLSVARLHDKIRRQREDFLQVLSTALIKNHDLVVAEELRNRNLLKNHALSQSISDVGWRSFLNMLAYKADLYGKEFLTIDPKYTTQRCHACGSIMGQNGYKK…		figs.1c and 2a
ISLan	MAIEDLSKAWKNFFDKAQVDWGKPRFKSKKATRQGFKTDRAKIIKGKLRLDKPHGIKNWYDIHMSGAKLLTGELKVVSIYRENGKYWASLPFEIEVANKAKTNRVTAVDVNVGHFNYTAGQINTLPKRLNHLYQRIKYYQKSLAKKRTVNGKRATKSNNYVKTRAKLQRDYRKVANIQHDIMQKFTTQLVEKYDKIVIEDLAVKEMQMTHVASKGLQRSMFGYFRQILSYKCDWNGKKLILADKYYPSTQRCSKCGHIKTGADKVGLNGNLKHGTKHNEYICYECGSVMDRDENAVYNLLALIN		figs.1c and 2a
ISLba	MLRTHKIRCYPNATMRRVLDQACDYRRYCYNQALATWNDMYDASLVLADKTARPNERQVRNELVNNKADWQYSRSARILQLAVHDLAHAWANFFNPEMPDHRKPRFKSKKRSRCSFKTDRAMVVNDKLRLDKPHGYRNRWYDIRLAEKPRWPGTIKLAAIVKEADGYYACLSIDVAKPEPLPESPRICGVDANIGQFVYNDGEAMSAIRGLTEQLVSLYHRVSLYQRRLARKRQANPKHFRSNNYRVTKTKLQRTYQKVTRIQDDLLQKFTTMLVKANGTLAIEDLDVKHMKMNKRLAKNLHRSLFGRFKVLMKDKAQWYGRQLIIVDRFYPSTQRCSQCGLVKTGDDKLTLTGNAFHGTKHHEFHCYGCGAQLERDENAVQNLIQYAQGQAMS		figs.1c and 2a
ISLca	MIKTHKIKLYPNATMRRELERLFNYRRFCWNQALETWNVMYDASLLMADKTLRPNERKVRDELVWNKADWQYEQSARVLQLAVNDLSKAWKNYFNPKMPDHGKPNWKSKKRSRKTFKTDRAQLLNGKLRLDKPRGAGAWYDIKLAEQPHWQGELKQVCVVQAADGYYASFSIEVQTSVEKRPVLTVTGVDANIGKFDYRTSTGYAIQPTLPDRLPILYARIAHYQRQLARKRKVNPKRFNSAAYRTTRTKLKRQYQRVERIQTDLLQKFTTMLVTDYDLIGIEDLDNQHMRMNKRLAKNLHRSLFGKFKVIMQYKADWYGNTLVLADQFYPSTQRCSRCGHVKTADERVTLSGNLKHRTGHDDYHCYQCGVKLRRDENAVENLIAYAKSKVYGVGYTLK…		figs.1c and 2a
ISLcr	MPEYYIKTKSYELFPNKQMKAVFDRNCDYRRFCWNEALALWNDEYDIRQLMLDKEIKAELRKAKSQRKFTAEQEEMLASYPAPNWKAIRNKLVAEKEDWQFSYSAHLLQLAVQDLGKAWQNFFNKAQKDWGKPKFKSKRAPKQGFKSDQARIVNGKLVLEKPQGLKANWQPIKLSEKPFDYPTGTMSFYRVRDRYYVAIPYKIPKDRFEIKKKTGKATGVDINVGHFNYEDGQLLIIPKSLTKTYSKIKHYQKQLAKKRTVNGRIKGAQSKKYLKTRIKLQASYQRAQNIQTDLMHKFTTELVNNYDQIAIEDLEVKGMLMSHVASKGMHRSMFGLFRKLLTYKCEWYGKELIIANKLYPSTQRCAACGLVKKGDEKITLQGNKKHGTKHNEFVCYNPS…		figs.1c and 2a
ISLcr2	MIIKTRTYRLKPNQRMKKVLDSLCDYRRFSWNLGLETWQNMHEARQLALTQHLKAELKKPRKKQKLTNAEREILANNPVPSWRRIRDELTENKQYWQTKLPAHVFNLAIQDLGNAWQNFFDKAQPGWGKPKFKSKKAPRQGFKMDQAKIKDGCLFLEKPRAVKETWNGFKLSSAPLSDDFGTISFYKEKNRYYASIPFKISDPEDKPKTGRYTGVDINVGHFNYRDGQCIVMPKSLAAVYCKIKHYQRQLSKKRVVNGKIKGMQSKRYMKARNKLQAAYARAKNIQNDLMQKFTTKLVSEYDSIVIEDLSVKGMLMSHVASKGMHRSMFGRFRQILTYKCEWYGKKLIVANKLYPSTQRCAACGLVKKGDEKITLRGNKKHGTKHNEFVCYNPNCRNYN…		figs.1c and 2a
ISLde	MAEQIEEVPAELIQTRVYELHPNKTMRKVLDEACDYRRYCWNQGLALWNEMYKARQTLKSSLASDSKRLTEEQKVLLKEKPSPSERRVRNMLVADKKDWQYAQSARILQLAISDLGKAWNNFFDKAQPGWGKPKFRSKREARQGFKSDRSKIKDGILYLELARRSSVPKDQWRGFKLSEKPLSDEFGVVSYFKEKGRYYVAIPYKIKAEDVKLPDKTGKATAVDVNVGHFDYTGGRVNVLPKRLDRIYKKIKHYQRQLAKKRVKNGEAACESINYLKTKAKLQACYRKAGNIQNDLMHKFTTELINDYDKIVIENLSVKGMLMSHVASKGVHRSMFGKFKQILTYKCDWYGKDLILANKLYPSTQRCAACGNVKKGDDKITLYGNKKHGTKHNEYICYN…		figs.1c and 2a
ISLde2	MHSADEFLKTVYTNFSQYRKRLVKADKSMDEKARYNFKMNVTKDKYGKHKNQLHKSWYRKGSINFLRNGASFRDITSQKLPEDSKGGIRIEDKHIDNHTFLTVADFGTVEVIEDLSELNLKDIALTKIKKLPDGTYRLQLTFSLPRKKQEAKTIQDFDWNMAGNEAFCSSDGKRIKVSDRTIKRADEYEQKINEIKSFRDLEENIHGRSKRYRRLDRRQQKLNAKRTNLLTNEYRHLVHEVADGCDTIVVEKLDAYEMRKRGKGSAQSKGINRRLAVLKPYELMTILESLVKKQNKRLVKVDSFWTSKACHDCGYINKDLKVGQKEWQCPSCKKTVDRDLNAARNILDWGIHPEHHAKLKKTAEEGKNLSPSSLVTEV		figs.1c and 2a
ISLde3	MRYHYRARKSGRLGSSMKCDLNWAFEGNTFSFSSDVPRKQFSVEMTSPWSYPRTGDITVVLDRIKQRLEVHKLISSKRYSNDSKKASGIDKGLATLLSCSSGNEYGKNFSKLANAIVDKYGKRNANRQPYMSLRWQLNQQLEQLEKANQPLSKTALRKKRKLLGKLKNLEQNNIGRKSYDKSYRSEQETVRSFINHAINRMIETEHPAVIAKEDLTFVKEKGVKSDNSRFARKMRKRLNSWTKGQLDERIVYLSSKNSIETHDVNPAYTSQYCPICGQHFEERYGSHHELTRCKKCGKMNANIAAAKNILSRLTDEEITLYTPYKRVKEILASRIKEA		figs.1c and 2a
ISLde4	MTDVENWRGPRDRIRQHEGKIKQARKAVRSWKKAYAENKTQNMKVPDSGTVRLARQKLLNEQFHIQGRHVTEAVKEVCMNLNSMWTNLGLKLKKIVQANESLAKEERQYLNYVFTASYYWQLILQGRENEAESSKESKYPVLRAALTKDQLRHCFGYIRRLTRKHKPYPHSSAARCMLYDEIMWKVIQKDGADHLDIMTAVSGKRKQFKLTGPFCYANKKKRGDVQLILDRDKKRLEVHRAIKAAVHDLHKSKKKKVGMDKGLATLLSCSSGHEYGFNFSQLVNAEAERINRRNTNRNEYIQAAKELRYELSALQAKLAIKHSAKTERRLRNRIGSLERRISRLEERHLGSKLYHRQHARKQCNMERIMNMSIRKMLLTEKPDVLVKEDLSFTKEKLPK…		figs.1c and 2a
ISLde5	MSDFFERYGRCRHFFLNRYCGIKSMLAVNNWQALRNQVRKWDKPVKGSKGKLETVYNFQTKHWVGALREACANIKSMWSNLANRLKKLIQGNENFSADQRHLLFFILKFKSAWQAVLLHKPIELPEEYTEALTEIEAKLTDKQIKQAHSYLRRITYRYHYRARKSGKLGSSMKCDLNWAFEGNTFSFSSDVPRKQFSVEMTSPWSYPRTGDITVVLERIKQRLEVHKLISSKRYSNDSKKAIGIDKGLATLLSCNSGNEYGKNFSKLANAIVDKYGKRNANRQPYMSLRWQLNQQLEQLEKANQPLSKTALRKKIKLLGKLKNLEQNNIGGKSYDKSYRSAQETIRSFISCAINRMIEKEHPAVIAKEDLTFVKEKGVKSDNSRFARKMRKRLNSWTKG…		figs.1c and 2a
ISLde6	MVSNEEKYGFTRQYHVLLTDKQKIQHEKALKTQNALFQYALKYLFKTYGVKHIGRPMPFSQKPIQYVLNKIKTGFIKDKYGLARWKKSVLFLSSHSADEFLKTVYTNFSQYRKRLVKADKSMDEKARYNFKMNVTKDKYGKHKNQLHKSWYRKGSINFLRNGASFRTITSQKLPEDSKGGIRIEDKHTDNHTFLTVADFGTVEVIEDLSELNLKDIALTKIKKLPDGSYRLQLTFSLPRKKQKSKTIQGFDWNMAGNEAFCSSDGKRIKVSDAAIKRADEYEQKINAIKSARDLEGNAHGQSKLYRKLDRRQQKLNAKRSNMLTNEYRHLVHEVVDDCDTIVVEKLDAYEMRKRGKGSAQRKGINRRLAVLKPYELMTILESLVKKQNKRFVKVDSFWT…		figs.1c and 2a
ISLdo	MIRTQKVRLFPNSHMQIALNDLCNYRRYCWNSALATWNELYEVYCLNSENDFKPSQRLVRNELVANKADWQYGLSARALQLAVADLGNAWQNFFDQAQPDWGRPKFKSKRAPRQGFKTDRAKLVAGKLRLDKPRGVKDWYDIRFNKQVDLSGKLKAVSIYRENGIYWACLNLEVTIKPKVKTNQVTAVDVNVGHLNYTLGVLKTLPLKLMRLYSRIKFYQRQLARKRQVNGKQATKMKAYLAMKNKLQRDYRKVADCQHDLMHKFTTMLVTQFDTIVIEDLAVKKMQMTHVASKGLHRSMFGYFRQLLTYKCQWYGKKLILADRLYPSTQRCSACGHIKQGEDKVSLQGNYRHGTRHNEYDCYHCGAKLERDENAVANLLALI		figs.1c and 2a
ISLeq	MEISLTIKARIYPSQSEAESLKKTMEAYRQGCNYASQYVFNNNFELGQSKLNKALYHDLRDTFGLKSQMAQSVLRTVIARYKTIATQLSQKPYKCLGYKIKRDLTWLWKPITFSRPQFDLVRNRDWSFKNDSQVSLNTLDGRIICQISMSGFEKYQDWQFGSARVLKSDKHWYLHISASQEIDDYDINQTRHVIGIDRGLRQIVTCYDEKGKTLFKNGKQIAKKRNHYKQLRRHLQLTNTKSSKRRIRKIGQRENRWMNDYNHCLSKTLVEKYGTDSLFVLEDLTNVTFDTVNNRKREDRYEHCSWSFYDLEQKLTYKAHLNHSEVIKVDAYCTSQRCPKCGRINKENRKHNLHLYICDKCGYKSNDDRIGAMNIQNLGTMYVSGNYKPTYQKLV		figs.1c and 2a
ISLfe	MTKANAIQNYHKAWNAFRKVHTAGVPKFHRKSYVWRYQTNCQYLKQKAAYLTNGTVHFEDSKHVIVPKLGRLRVKGSHQRVLARSAETRIGTVTIVKDASGRFFLSMQLASDTPFVNWPQNTGKQIGIDLNTENFLTTSNGDTVANPRYYRIIKGRLAKAQRILSRRARRAKQEHRPLRTSKNYQKQRLLVAKLHAQVFERRRDFLHNVSTTLIKNHDFVAAEELRSKNMLKNHALAMSIADVGWRTFLGMLAYKAELYHRQFLTVNPKNTTQACHECGFVMGTAGTEKLTLADREWTCPKCHAHHVRDHNAAQNILTKGIIKLA		figs.1c and 2a
ISLfe2	MTKLIKGVKLRLYPNKQQQAQLWQMFGNDRRVWNLMLDMAKQRYQNNPSSHFVNEYGMNYLLKQLKQEYPYLKDSDATSFLVVNHNLVQAFKMLFKHRGGYPRFKSRHAAKQSYTGRSVCTVIAKRRMKLPKLGSIRTSKTSQAVNGKIKRYTVSYGPTGRYYLSLQVETVAPEALPKTGKTVGLDVGIADLAISSDGEKFGTFNAKWLEKQATKWQSKYSRRKYQATVAVRQWNHNHKDVKMDLNDYQNWQRAQKQKARYQQRIANQRQDYLHKLTTALVKKYDVIVIEDLKAKNLQKNHHLAKAIANASWYQFRTMLEYKCDWYGKQLITVNPNYTSQICSTCGYHSGKKPLEIREWTCPKCGTHHDRDINAAVNILHRGLKAVG		figs.1c and 2a
ISLfe3	MLLKRLKEEYPWLKQAESTSLQSANRNLADAFQRFFKGQNKFPHFKSRKYAQSYNSKCVNHNIKVIDNHHIKLPKLGVVYFRSGRLPQGKIKNVTVRLTVANQYYITVLTECENQTLAKTGKRVGGDLGLKSLLNLSDGYKEPIHHFEDKYRKKLHHWEKLRSRRYLLAKQAIAWDYHNKVLAPRQLDDFKNYQKARVMVAKYRQKIANQRLDQLQKFTTKLVKQYDIIVLEKLNIKGMLKNHKLARAITNASWSKLVSILQYKCDWYGKKLIQVNPSYTSQICINCGKGNHRLGLDKSEWLDVREWDCPNCGTHLDRDINAAQVILKKGLATQ		figs.1c and 2a
ISLfe4	MKSMAKMKYHYGLKMRCYPSDQQKQLIKINSDASRFIYNEMVAINKELMQLRRVKLPIDIVQDRIKQLTMRQNAKQMSNHYQFLEDKRIDSLTKANAIQNYRKAWNAFRKVHATGVPKFHRKSYHWRYQTNCQYPGQKNALLTNGTVCFLDNSHIKVPKIGLLRVAGSQARLLKRICETRIGTVTLTKDSADRFFLSMQLASDESFVKVSKATHGHVGIDLNTDNFLTDSEGNIVPNPRYYRTIKGKLAKEQRILSRRQQRAKKEHRSLRDSKNYQKQRLLVAKLHAKVMNQRHNFLQQISTALIKNHDLVVAEELRSKNLLKNHALALSISDVGWRTFLGMLAYKAKLYGRQFITINPRNTTQTCRDCGFVMGTNGTDKLTLDDRNWTCPNCGIHHIR…		figs.1c and 2a
ISLfe5	MSDATSFLVVNHNLVQAFKMLFKHRGGYPRFKSRHAAKQSYTGRSVCTVIAKRRMKLPKLGSIRTSKTSQAVNGKIKRYTVSYGPTGRYYLSLQVETVAPEALPKTGKTVGLDVGIADLAISSDGEKFGTFNAKWLEKQATKWQSKYSRRKYQATVAVRQWNHNHKDVKMGLNDYQNWQQAQKQKARYQQRIANQRQDYLHKLTTALVKKYDVIVIENLKAKNLQKNHHLAKAIANASWYQFRTMLEYKCDWYGKQLITVNPNYTSQICSTCGYHSGKKPLEIREWTCPKCGTHHDRDINAAVNILHRGLKAVG		figs.1c and 2a
ISLhe	MQNTKIKRYTVLLEPTGKYYLSLQAEIPEPEKYSLTGKRVGIDVGVADLAILSNGLKYPSFNSSYFEKKAKIWQKKYSRRRHLVKLLVLQDRNKRVLCPRSLESFTNWQKAQKSKAKYQAKAANQRRDYLHKLTTHLVKQYDVIAIEDLKTKNLQKNHHLAKSIANASWRMFRQMLEYKCEWYGKKLIAVDPKNTSRICSKCGYNSGAKPLEIREWTCSKCQTKHDRDINAAVNILHKGSTKLNGQGLAMVTS		figs.1c and 2a
ISLhe2	MGIDVGVADLAILSNGLKYPSFNSSYFEKKAKVWQRKYARRRHLAKLLVLQDRNKKVLCPRSLESFTNWQKAQKSKAKCQAKAANQRRDYLHKLTTHLVKQYDVIAIEDLKTKNLQKNHHLAKSIANASWRMFRQMLEYKCEWYGKKLIAVDPKNTSRICSKCGYNSGAKPLEIREWTCSKCQTKHDRDINAAINILHKGSTKLNGQGLAMVTS		figs.1c and 2a
ISLhe3	MKNSDSSSLQVVNEFLTQSWKNFFQDKSGQIGKPRFHSRKYLKKSYTGKSIIKTAGKRYLKIPKLGYVKTSKTGVLQNTKIKRYTVLLEPTGKYYLSLQAEISEPEKYSLTGKQVGIDVGVADLAILSNELKYPSFDSSYFEKKAKIWQKKYSRRRHLVKLLVLQDRNKRVLCPRSLESFTNWQKAQKSKAKCQAKAANQRRDYLHKLTTHLVKQYDVIAIEDLKTKNLQKNHHLAKSIANASWRMFRQMLEYKCEWYGKKLIAVDPKNTSRICSKCGYNSGAKPLEIREWTCSKCQTKHDRDINAAVNILYKGSTKLNGQGLAMVTS		figs.1c and 2a
ISLhe4	MLKGIKLRLYPNRTQQNQLEQMFGNDRFHSRKYLKKSYTGKSIVKTAGKRYLKIPKLGYVKTSKTGVLQNTKVKRYMVVLEPTGKYYLSLQAEISEPEKYSLTDKQVGIDVGVADLAILSNGLKYPSFDSSYFEKKAKVWQRKYARRRHLAKLLVLQDRNKKVLCPRSLESFTNWQKAQKSKAKCQAKAANQRRDYLHKLTTHLVKQYDVIAIEDLKTKNLQKNHHLAKSIANASWRMFRQMLEYKCEWYGKKLIAVDPKNTSRICSKCGYNSGAKPLEIREWTCPKCQTKHDRDINAAVNILHKGSTKLSGQGLAMVTS		figs.1c and 2a
ISLhe5	MGYVKTSKTGVLQNTKVKRYTVVLEPTGKYYLSLQVEISEPEKYSLTGKRVGIDVGVADLAILSNGLKYPSFNSSYFEKKAKIWQKKYSRRRHLAKLLVLQDRNKKVLCPRSLESFTNWQKAQKSKAKYQAKAANQRRDYLHKLTTHLVKQYDVIAIEDLKTKNLQKNHHLAKSIANASWRMFRQMLEYKCEWYGKKLIAVDPKNTSRICSKCGYNSGAKPLEIREWTCSKCQTKHDRDINAAVNILHKGSTKPTGQGLAMVTS		figs.1c and 2a
ISLhe6	MRKKVVPRNKAKYEHLASEYLVAGNSKLDQCSHASHDLYNRDLYDLRQGFFKRNYVKGYCDLDQRFKKRYSARESMLYHSLFYVQSAQQTLKEVNTIWSAWLKALKAYQANPGKFTGRLRMPKYLAKGQRHVFFVTNQNAKVKDDYLIIPKLGFKLKLTPHLKAIQRVAFKPVYGGYKAIVQYKTNRDIDYLPDNGRYMGIDPGVDNAFACVANIQKAPLLVNGRAIKSVNQYYNKERSRLKALQARYHQLESIVDTQQGKKPVYRETKAMRRITAWRNRKIRQFAHKASKRIVDYALSCGANTIVIGNNKSWKRSSDMGRKNNQNFIGIPHKVMIDMIQYKANLAGISVIRTNESYTSQTSALDHEKPCWENGSQSRKRQGKTPINRRIHRGLFQSNN…		figs.1c and 2a
ISLhe7	MVLKGIKLRLYPNRTQQNQLEQMFGNDRFVWNQMLAMMNERYQNNKALPFLGKFKLNYLLKPLKKEYPFLKNSDSSSLQVVNEFLTQSWKNFFQDKTGQIGKPRFHSRKYLKKSYTGKSIIKTAGKRYLKIPKLGYVKTSKTGVLQNTKIKRYTVLLEPTGKYYLSLQVEISEPEKYSLTGKQVGIDVGVADLAILSNGLKYPSFDSSYFEKKAKVWQRKYARRRHLAKLLVLQDRNKKVLCPRSLESFTNWQKAQKSKAKYQAKAANQRRDYLHKLTTHLVKQYDVIIIEDLKTKNLQKNHHLAKSIANASWRMFRQMLEYKCEWYGKKLIAVDPKNTSRICSKCGYNSGAKPLEIREWTCSKCQTKHDRDINAAVNILHKGSTKLNGQGLAMVTS		figs.1c and 2a
ISLhi	MTTVVKGVKLRLYPNQAQINQLWQLFGNDRFVWNQMLAMANKRYENNPKSHFICEYDMNYLLKPLKQEYPFLKASDSTSLFVVNHNLALAFKNLFQHQGGHPRFKSRHSAKQAYTGQSICVVEAKRRLRLPKLGSIRTSKTSQLRDVKIKRYTISHDPTGRYYLSLQVETEVHDLPKTDQRVGVDMGVADLAITSSGVKYETFNARWLEKQANLWQSKFSKRKQRATVAMRQWNHRHKLSKLELNDYQNWQRARMVKARYQAKIANQRKDYLHKLTTDLVRNYDVIVIEDLKTKNLMHNHHLAKSIANASWSQFRTMLEYKCEWYGKQLVVVSARNTSRICSACGQNDGPKPLAIREWTCSECRTHHDRDINAAVNILNCGLKAIG		figs.1c and 2a
ISLin	MDQAVTIKAKLLNIDDQTTHAFIKTMTAYRDACNFVSQYVFDHDFEFRFSQLNQALYHDLRDLFGLKSQMAQSVIRNVVARYKTIKTQLKQTPFRYNTGEKDAQGHAIWSRIPRDLTWLWRPVKFKRLQLDLQRNRDWSYLNTSSQLSLNTLMGRKKVDFVCKNFDQYLDASRWKFGSIKLLQFKNNWYIHLSATMSLPEYELKQTQHIVGIDRGLRFLAACYDEQGQTLLCSGQKVLRTRRKYKKLRAQLQAKDTKSAKRRLKKIGQRENRFISDVNHRLTKTLVDHYGPNTIFALEDLTNVRFATEKAAKKRRYEMVSWTFYQFEQFLAYKANLNSSTVVKVSPRFTSQRCPKCGRIRKENRNHELHLYICDECGYKSNDDRLAAMNIQFLGEQYHK…		figs.1c and 2a
ISLin2	MLTGIKLRLYPTQTQVNQLWQMFGNDRFVWNRMLDMMNERYKNNKDLPFLTKFKLNYLLKPLKKEYPFLKNSDSSSLQLVNEFLNQSWKNFFKDKTGTVGKPRFHSRRYLKPSYTGKSIVKIAGRRYLYLPKLGYIKTSKTGVLKDVKIKRYTVSLEPTGKYYLSIQAEVKTPEKLKKTGKQVGIDVGVADLAILSNGLKYPSFDASYFEKQSRVWQSKYSRRRHLAHLLCEQDKNQKVLNPRSVEGFSNWQRARKLKAGYQKKVANKRKDYLHKLTTHLVRQSLPSQSNCQCFLEPV		figs.1c and 2a
ISLke	MKRSSKPIKSYSKTVRAYSLKLDEDTYTKLDQLFINYGKCRNMFLNQYCGISHMLDVKQYRKLRDQIKGSKQNKKYVAKYNFLDKHWCYALSDACANINSMWSNLANQIRRVVQANEAIDKDERHLIYYLLSIRELWYYALTNNQAVLLDLSHGLQKHLAELEEAVTPKQRKHAYSYLSRLTRRYKYTPRKHHSLNKSMTYDESMYKFTGDQLEELAISSHVSRKRFSLKLTSPWHYRLNGNLQIILDRDKKRIEIHKVIKVRQKKEYQAGTKLGIDKGLATLVSCSSGREYGKGFSQFTRPEIEQESQYLARRNPYYGYRYQLKKKLNQLKNANIPKQIIKKKQLTRQLNKLNANNIGHKRKDKRHASYHACLESKINHAIKTMIKLETPSLIVKEDL…		figs.1c and 2a
ISLko	MVKTMAQLPYHYGVKVRVFPSTEQKRLIKRNSDASRFIYNQMNGMNNDLFRLKQVKIPITLVLNRIADLTERLKKPSTAISNIHGWLNHPDFDSLMKANAIKNYKTAWKLFRQVHQAGTPKFHKRGYTQTYQTSCLYSAKVTGPTMRNGSVRLNDNHYLQLPKLGRLRFRGLPSKILGQTDAIRIGTTTVSMDAVGHYFVSMQLGSEHPFVSEQSVVKSKVGIDLNLENFLTDSNGQVIDNPHYYRTIRGKLAKAQQKLSRRARRAKKSQRRLSESKNYQKQRLLVAKLQLKVANQRKNFLHHVSTALIKNHDLVVAEELRSKNMLRNHALAMSISDVGWRTLLSMLAYKADLYGRKFLTIDPRNTTQTCSDCGHVMAGKNKLTLADRKWTCPNCGIFH…		figs.1c and 2a
ISLmu	MKSMSKLAYHFGLKMRIYPSTKQKQIIQVNSDISRTVYNKMVAIDQELYHLKQVKLPIDTIQARIVDLESRKNARNMSNHYQYMQDKRIDSLTKANAIQNYQKAWKLYRKVHKAGTPNYHKKSYRQSYQTNCQYGKNKSMDMFSGSVRFIDKKHIQMPKLGKLRVSGSYRRILDKKSDIRIGTVTISKDSADRYFVSMQLGSDTPFVKILPKTNSQIGIDLNTENFLTTSDGVIVDNPRYYRTIKHKLAKAQRTLSRRELRAKKENRSLRDSKNYQKQRHLVAKLHDKIRNQRKNFLNYLSMVLINNHDLIVAENLRSSNLLKNHALAMSISDVGWRSFLQKLEYKANLYGRIFITVNPKNTTQMCHTCKFVMGTDDTQKLTLKDRQWICPQCGAFHIR…		figs.1c and 2a
ISLmu2	MTKTMAQLPYHYGVKVRVFPSTEQKRLIKRNSDASRFIYNEMNGMNTDLFWLKKVNTPITLVLQRIADLTERLKKPSTAISNIHGWLNHPDFDSLMKANAIKNYKTAWKLFHQVHQAGTPKFHKRGYTQSYQTSCLYSAKVTVPTMKNGSVRLTDTHHLWLPKLGRLRFKGLPSKILDRANDIRIGTTTVSMDAVGHYFVSLQIGSEHPFVAKHPEIESKVGIDLNLDNFLTDSNGQAIDNPRYYRMIKGKLAKAQRKLSRRARRAKKSQRRLSESKNYQKQRLQVAKLQLKVAYQRKNFLHHVSTALIKNHDLVVAEELRSKNMLRNHALAMSISDVGWRTLLSMLAYKADLYGRKFLTIDPRNTTQTCSHCGYIMVGKNKLTLADRKWTCPNCGTFH…		figs.1c and 2a
ISLmu3	MVKLGRTIKLRLYPDTNQADKFLAMSQEYQRLANIVSQWIFDHEFQLSWLKINHQLYKIFRQESPLNSQMVQSVFRTVVARYKTVQEQMKQHPYRYQNEEKKWVQVPRDLNWLVQPIQFRRPQADLVRQSNYSFVDKMQQISITTLGKRTKLGFTEKGFEKYFTEDWKLGTAKLVHTQGKWFLHIGITKETSDFNSKENPQIVGVDRGLRFLATAFDSEGKTLFFDGQKILLKRKKFLEIRRQLQSKGTKSAKKKLKRLAQRENCWMTDVNHRLAKTLVSRYGSHTLFVLEDLTNVTFNIDDLPKSLRNSHRSWAFFQLESFLTYKAQAIQSTVVKVSPAFTSQRCPKCGLVEKTNRHHETHEYWCSQCQYRCNDDRLGAMNIEMLGRDWLSGVKHPKI…		figs.1c and 2a
ISLpa	MNSIAFKVRLYPNQKQVNRINRTFGSTRFVWNQMLAMQNERYENNPQAKYQNNYAMNLMLKPLKAEYPWLKDVDSTALQATNDHLHDAFQRFFDPELENGHPKFKSKKDYAQSYTTKAVNQNIKVIDNHHLKLPKLGQVYFRAGRILNGKIKRATVRINAQGQYYATILLESEKQAFKPLPKTKRVVGIDLGLDNLLILSNGQKVNMMHFDLEAKYQVRIWERKMARRRRNAQKEMAFDKHEKLLLPRTSLKQFLHYQQARRTAAKLKRQVSDRRYDRLQKLTTQLVQTYDVIVVEKLNTQGMLKNHHLARAISNAGWGKLVTMLKYKCDWYGKQLIFVDPQNTSRICHQCGQKNHQFDSLNQHEWLAVREWDCPTCGTHLNRDINASQNILHRGLAQI…		figs.1c and 2a
ISLpa2	MMKDCGEMAQIIKGIKLRLYPNAQQREQLWQMFNNRFVWNQMLAMAKERYQNNPSSHFVNEYGMNYLLKRLKQEYPFLRASDSTSFLVVNHNLAQAFKMLFKHRGGYPRFKSRRAIRQAYTGRSVCRVLAKRRVKLPKLGSIRTSKTTLLANSKIRCYTVCFEPTGRYYLSLQVAVEAPEHLRRTGKVVGIDVGVTSLAVSSDGIKYGTFNAKWAEKQATKWQSKYAKRKHQATVAVYQWNHNHKAFKKELSDYQNWQRAQQQKARYQVKVANQRKDYLHKLTTTLVKQYDVIVIEDLKAKNLQKNHCLAKAIANASWYQFRTMLAYKCAWYGKKLVTVKSNYTSQICSHCGYHSGSKPLNIREWTCSSCGAHHDRDINAAVNILHQGLKAIG		figs.1c and 2a
ISLpa3	MAGRILNGKIKRATVRINAQGQYYATILLESEKQAFKPMDKTNKVVGIDLGLDDLMILSNGQKINMMHFDLEAKSQVRIWERKVARRRRNAQKEMAFDKHEKLLLPRTSLKQFPRYQQARRTAAKLKRQVSDRRSDRLQKLTTQLVQNYDVIVVEKLNTQGMLKNYHLARAISNAGWGKLVSMLKYKCDWYGKQLIFVDAQNTSRICHQCGQKNHQFDNLNQHEWLAVREWFCPTCGTHLNRDINASQNILHRGLAQTTKEKALV		figs.1c and 2a
ISLre	MLFNAFFKGQNKFPRFKSRKYSQSYNSKYVNGNIKVLDCHHIKLPKLGIVYFRAGRLPMGKIKNVTVRLNVAGQYYITVLVESENQTLPKTSKYIGGDLGLKSLLNLSDGCKEPINHFEDKYRKKLYRWEKLRSRRFLKAQQEITWDHHNKVLVPRQLDDFKNYQKARIMVAKYRQKIANQRLDQLQKFTTKLVKKYDIIVLEKLNTKGMMKNHHLARGIANASWSKLVDILQYKCNWYGKKLIQVNPSYTSQICANCGKNNHRLGLNKLEWLAVREWDCPNCGKHLDRDINAAQVILQKGLAIR		figs.1c and 2a
ISLre2	MESENQTLPKTSKYIGGDLGLKSLLNLSDGCKEPINHFEDKYHKKLYRWEKLRSRRFLKAQQEIAWDHHNKVLVPRQLDDFKNYQKARIMVAKYRQKIANQRLDQLQKFTTKLVKKYDIIVLEKLNTKGMMKNHHLARAIANASWSKLVDMLQYKCDWYGKKLIQVNPSYTSQICANCGKNNHRLGLNKSEWLAVREWDCPNCGKHLDRDINAAQVILQKGLAIDR		figs.1c and 2a
ISLre3	MLKAVKMRIYPNSAQRNQLWQTFGCVRFVWNQMLNMQIERRKNNPEAKFVNAFGMNNLLKQLKVEYPWLKQAESTALQSANRNLADAFQRFFKGQNKFPRFKSRKYSQSYNSKYVNGNIKVLDCHHIKLPKLGIIYFRAGRLPMGKIKNVTVRLNVAGQYYITVLVESENQTLPKTSKYIGGDLGLKSLLNLSDGCKEPINHFEDKYHKKLYRWEKLRSRRFLKAQQEIAWDHHNKVLVPRQLDDFKNYQKARIMVAKYRQKIANQRLDQLQKFTTKLVKKYDIIVLEKLNTKGMMKNHHLARAIANASWSKLVDMLQYKCNWYGKKLIQVNPSYTSQICANCGKNNHRLGLNKSEWLAVREWDCPNCGKHLDRDINAAQVILQKGLAIR		figs.1c and 2a
ISLru	MTGRSTCKVLARRRMQLPKLGSIRTSKTGLVGDAKIKRYTVSYEPTGRYYLSLQVETEVNQLPETRQSVGLDMGLADLVISSDGVKYGTFNAEWLEKQAVRWQRKYARRRYLAQCEVWKWNHNRSDHLEELDDYSNWQRARVNKARCQKRIANKLRDYLHKLTTDLVRNYDVIVIEDLKTKNLQKNHHLARSIANASWYQFRAMLEYKCAWYGRQLVVVKPDYTSQICSNCGFSSGKKPLEVREWTCPKCGIHHDRDVNAAVNILHKGLKAIGQGLALVK		figs.1c and 2a
ISLru2	MVLKAFKLRLYPNKTQRNQIHVNFGCARFVWNQMLNMHIERYKNNRKAKFQGRYSMDVMLKALKIEYPWLKQAESTSLQRVNRDLDDAFQRFFNPDLQNGFPRFKSKKNTNQSYTSKFVNNNIRIVDEHHIKLPKLGLVYFKAGRILNGKIRAVTIRVNSRKQYQASILVESENQTFKKTKKSVGIDSGLKSLTITSDGQKEDILKVDDRLNKQLRIWERKKSRRYENAKKAMAFDEHDKVLFPRTDLKQFPRYQQAVRTVAKLKKHIAERRRDNLHKLTTRLVKDYDTIVVENLSVKNMMKNHHLSASIANASWGTLISQLKYKCAWYGKKLIIIDPKNTSRICHECKQKNHEFDSLSQSEWLAAREWDCPNCHAHLDRDVNAAKNILAKGLETLS		figs.1c and 2a
ISLru3	MYEESEVNLLQQTITIKCKLKLQSSLDESVLTKSLEQYRRACNAVSQYMFDHSFEMAQAKLNKALYRQLRNDYGLKAQMAQSAIRNVVARYRTVKTQLAQKPYRYNTGKQDRYGNDIWKNETRTLDWLWHPINFKRPQLDLQRNRDWSLKDNHIMSINTVNGRIKVPFTCQGFDQYLNGTWEFGMAKILHVGNKWYMHISATKELPDYLKEQSQHVVGIDRGLRFLATSYDEHGKTLFFQGQEALRKRRKFKRLRQQLQSRGTKSAKRRLKKIGQRENRWMTDINHQLSKTLVNRYGADTLFVLENLANVRFATEKVTKTQRYEQVSWAFYQLAQFLTYKAHLVGSEVVQVSAKYTSQRCPKCGRIYKNNRNHQQHLYVCDRCGYQSNDDRIGAMNIQL…		figs.1c and 2a
ISLsa	MVKQQKSKKKVIKTFKEVRAEKTEVQYEYLVEKHIIKSNDARYAILDKYAHLSNNVYNQALYRFRQAFFKGKWLSYEKLDKSFKQSFNQKDCMLYRSMKSVHLAQQILKLVNQNMTSWNKARKAYLKAPQKFTGKPKIPKYKPKGGKNIVIVDNQTAKLRANGIVEIPVMDSLKIKLQHKKTNKIQQVRIIPRNNTFVIEIVYKTNKVIDYKEDNGRYLTIDPGLDNAFTLASNVKGFKPVIINGRPLKSVNQYYNKQKARLTRIYDLSKQNRNTKRLNKLDFYRNQKMLKFAHEASKRIVEIALSHELNTIVIGKNKGQKRSSNMGKRINQNFIGIPHQKMLEMIEYKANLAEIVVIQANEAYTSQTSFLDNEIPIKQNGDKARKRKGLSPVKRRVKR…		figs.1c and 2a
ISLsa2	MKTVITAKVRLYPNQEQVAQFKAVTKEYQRLCNLVSQWYFDNDCKVNRKKFNKEMYRYLRAESKEINSAMVQSTYRTVEARYKTVETQLKQRPYRYQDQNTGEWYHEKRDLSWLHKAVKFSRPQADYVRNINYSFVEQGSKISMNILGQRIKVAFNGNYLNFFDPNYKLGTAKLVQLKKHWFLHIPVTIETDDWEKEHNQHIIGLDRGLRQIVTSYDEKGKTSFKNGKAIAYKRRKYAYLRSQLQSKGTKSSKRKLKRLSQKENRWISDVNHCLSKTLVDTYGQNSLFVLEDLSGVTFEKTNSNKNQTRELHSWAFYDLQTKLAYKARKNQSQVLIVSAKYTSQRCPKCGQIRKENRNHRIHRYDCVFCGFKTNDDRIGAMNLYELGKQYISGIENPKF…		figs.1c and 2a
ISLsp	MYQGLKLRIYPNLEQQKQIVENFGATRFVWNQMLDMQSKRYKNNKDSKFLNGFAMNFLLRQLKTEYPWLKQAESTSLQDTCETLAVAFQRFFKKLGGYPKFKSRKFPKQSFKSKCINNNVRLIDNHYLKLPKLGIMKYRGKFTDDKIKSTTIQLSPTGKFYCVLLIECENQTQFSKTNKTVGLDMGIADLIITSDAVKYPTIRFDQILAKKKHYWEKRLARRRLLAQKEIAWDKHNKVVEPRELANFKNYTKTKQMVAKYSEKIANQRKDYLHKITIGLVKDYDKIVIEDLKTNNMIKNHKLARAIANQSWRMLRLMLEYKCKWYGKVLSVVNPYKTSQLCFNCGYDDGKHELDVRTWTCPQCHTQLDRDVNASKNILKLGLG		figs.1c and 2a
ISLsp2	MTLRAIKTRIYPQINQQEKIINNFGCCRFVWNQLLSMQIERHNNGGSYVNEFGMNYLIKCLKQEYPFLKQAESTSLLHVSRDLHHAFQKLFKTHVGFPKFKSRKFPKQSYQSNAVNHNVIQINQHYIKLPKLGRIVFKSGRQLTGKIKNVTIRLSATGKYYAVLLVDNDVRELPKTKQAVGIDMGVTDLMITSDGVKYPTIRFDKALSQKKHYWEKRLARRRLQAMREIAWDKHNQVLEPRELNDFSNYRKARLMVAKYNEKIANRRNNYLHQLTKKLVMLYDVIKIEDLKTKNLLRNHKLARAIANQAWRELRTQLEYKCAWYGKQLVTVNPRKTSQICADCGYDDGKHGLAIRQWTCPKCGINHDRDINAAKNILHA		figs.1c and 2a
ISSha	MTRSYKTKLHVANDAQNDFLVLCMAVKRKLYNLYRSVQFGLLETRKRLYPDYEAFKELPKETRNQFYISAAEFEKVFNHVIRVSGSYPAWWDQAPQKTRKQAFRDAERAFQNYFKGLAEEPRFKGYHARQVAYFSGAIRVQRDRIRLPLIGWLRLSEFGYLPTDDRLQKIGYHITGCWVSRWANDYWVVVATDEPAPTQPVAHTETELGLGIDLGIKDMAILNTGKKFINISKTSYYYHVEKMKKRWQARLARRKIAAEKSFAKNHPHQKAGYLTSRGIEEARYYLTRWSAKLAKINKETVRQAIAQIVKLKPPHITVEKLNIKGMKANPKLAPSIQKLGLAYFKTWLTWQCLKHGIELREVSTWYPSTKLCSTCGTYNRAQFHGTMADLAVRQFNCPH…		figs.1c and 2a
ISSha2	MELTKTVKIQIKLAAEADGDLLRQAMEQYRLACDDVSRYVFDHGFVLNTTKLQIVLYRDLRTQFGLKAQMAQSVLRTVTARYKAVRTQLKRKPYRYQDAAGKWHKRAKDLTWLWYPISFRRPQLDLVRRRDWAIRKDGSFSLNTLDRRITVWPVLNHWRDYFDGTWKLGTAKVLTSGGKWYLHISVTREVPDYTQDQTIHVVGVDRGLRFLATAFDETGRTTYRSGTRALNKRRRYKHLRAKLQAKGTKSAKRVLKRIRQRENRWMSNENHRAAKALVDYYGPNTLFVLEDLTDVRFATEQVAKDRRYEQVSWPFYQLEQFLIYKTAAQGSHVLKVPSDYTSQRCPQCGVIKKQQRNHDRHEYRCACGFQANDDQSAAMNIQQLGSQWLAGTAKPRYTR…		figs.1c and 2a
ISSha3	MPIKTHKIRIYPNAEMATVIIELMDYNRFCWNKGLAAWNDMYDASLAMANKKLRPSEYKVRDELVKNKTDWQHQFSARVLQTAVHRLHQAWQNFFNPAMPDANKPKFHHKWDPKQSFTTDRAVITGKYLTLDRPHAASHRFGTIKMAETLRFTGEIKTVTITKRGKKFYASVNVLVEDTPHPAFYDSWDIVGVDVNVGHVRWNGGDINTFTPRMAALHQRIKYYQKCLNRKRRRNPGDYRSKTYQRITAKMNRAYEQVHALQDDLIHKFSHMIIKNYPVPCLEDLDVHRMMMDEKKAKGLQRGLFRRLRTAIEYKAAWHHRNLVIANRFFPSTQRCSNCGCIKTKESYGGKMTLQGDSIYHQHDVYRCYECGLVIDRDDNAVQNLIQYAAGLTPEWETV…		figs.1c and 2a
ISSpa	MTKKMSEFKYHYGIKMRIFPSREQKHQLDNNINASRFAYNEMVAIDKELFQLRKVKCYIASVVNRIAYLQKRKNNTQMLFALHPWLSGTNVGTDVVDQARRAYQSAWRLFRQVHRSGTPKFHKKQMSGSFQLPNRYAKVQPNLFNGSCRFLDSKHVKISLIGRLRVSGSHRRLFSCGNDVRIGTITVSRDATGRYYLSMQLGSDTPFVVGGKQQISPVGIDLNTDNFLTDSNGNIVANPRYYRSIKGKLAKAQRKLSRRALRAKKENRPLREAKNYQKQRVLVATLQRKVANQRNNFLHLVSTTLIKNHDLVVAEELRSKNMLRNHALAMSIADVGWRTFLGMLAYKADLYGHKFVTVNPRNTTQTCSECGYLMCGDKKLTLKDREWTCPQCGNHHIRD…		figs.1c and 2a
ISSpe	MTYQGIKLRLYPNQDQQLKIKLNFGYNRFVWNQMLNMLITRHQNNPKAKFLSVFDLNNLLPALKIEYPWLKDAESTSLQVTNHDLIEAFKQFFQKQHGFPKFKSRKYPKQSYQCKAVSQNIKVVDRHHIQLPKLGKVSFRTGRLPVGKIKAVTIRLLATGKFYANVLVDTDIEELPKASKVVGIDMGVADLMITSDSIKYPTIRFDKRLGKKKHYWEKRLARRRRQAEKEIAWDKHNKVPEPRELNDFKNYLKAKHMVAKYSEKIVNQRDNYLHNITKELVEQYDVIKIEDLKTKNLLKNHQLARAIANQSWRKLRIMLEYKCTWYGKRLVTVNPRKTSQLCATCGYDAGKHTLDIRQWTCPSCGSNHDRDINAATNILKATA		figs.1c and 2a
ISSsi	MLIIKGKMSDERKQAIKDRMKAVKATFTYSFGFKIRVYPSAQQADIMLFNCHTARYIYNAKVFRDWGSKQHAKWLNTDSRLDTNMPSMAIRNYQASWNMWRKVNSAGTPKPKRKDQYRFSYQTKNSYPAKSRQAGEDIFNGAKVKVTDNHHIQIPKVGRLKASANNIKHLPHEKGVRIGVTTIKQEPNGAWYVSFQIKADHPLKQALPKTGSEIGIDLNLSNFLTDDQGHQVPNPRYYRKMLTKLAKQDRKVARRRRRAKKEHRRLLDSRNYQKARRQRANLHSHIAHQRNDFLHRTSTVLIQNHDLIVSEELRGKNMLKNHALAMSISDVGWRTFISQLEYKAELYGRTYITVHPAYTTKRCHCCQAINQQVKLGQEEWRCPNCHVFHVRDHNAAINI…		figs.1c and 2a
ISSsi2	MVIKFNKAEPLILLTYKVEIKPTEKQAWQLDCHIGGSRWAYNLFLDINRQRYERGYCYLNAYAFSKWFNHEYLEANPDDRWIKELYAKSVKQAFIDADTAMNRFFKKQSGFPHWRSFKRDQGSYYFVKNSKTQIIACQRHRIKLPKLGWVRLKEFGYIPTDSEHFVIKQGRIKFKAGRYYLTCLVEQAELPKLASTGEPIGIDLGLKEFAILNDGTLYPNQNKSSRVRRIRKRLRRLQRKLSRQYHALKARRQKEGKSATDLNLAKTQRKVQRLYQRLTHIQADYQNKIIAAVVRTKPQWVALEDLNIKGMMKNRHLAKAISYQGFYNFRIKLIAKCQQLDIPVHLTNRFEPTSKLCHQCGHKKVDLKLQDRVYECQNCNYTEDRDINAALNIRDTENF…		figs.1c and 2a
ISTfu1	MLTGRRYLLAFTPEQEEFAEKIGDACRVVWNTALEQRRQYRRRGAFIGYVEQARQMAEAKKDFPWLAEAPSHTLQQTLRDLERACKTHGTFKVRWRSKRKNAPTFRFPDPKQITVERISRRWGRVKLPKLGWTRFRWTRPLGGQLRNATVLKDGGRWYISFCVEDGLMESAPNGKPPVGVDRGVTVAVATSSGWMRDREFVTPGEAVRLKRLQQQLARQRKGSNRRAATRAKLTKLNARIRARRTDFLAWTANRLTCDHGLVVVEDLNIRNMTASAKGTLAEPGRNVAAKAGLNRAILAKGWGGLLTALEHKARYHGSRILRVPPAFTSQTCHACGHCAPDNRESQAEFRCRACGHQANADVNAAKNILAAGLAVTGRGDLAVGRSVKRQPPKVEAA		figs.1c and 2a
ISHahl1	MIQRKATYRLYPTAEQLAALEHQLWVHCLLWNEALAERRWAWSERQESLGFSAQCKRLTEWRSQSKLLSGLNAQSEQVTLKRLDLAFQHFFRRVKQGETPGFPRFKSLHRFKGWGYKTHGDGWRLLTNEQMQHGTLRLSGVGAVAVRGRPRTPGTPKTCEIIKRGDRWYASITLNCEPVRECGEKMGGLDWGLETFATVATAQGAETIDNPRHLAGTLDAIRGVQREISRKEEAAKKASGRSRGFPISNRLRKAYDELRRLHRKVANQRHDFLHQVSARLIKEFSALGLEALSIRNMTAKGGQHKRGLNRGILDAAGGAFHQLLGYKAEEAGAWAVEAPTRQIKPSQTCHACGQQEKKPLGQRWHSCPCGASCSRDENAARVLLAWLERSLSGREPADA…		figs.1c and 2a
ISTfu1	MLTGRRYLLAFTPEQEEFAEKIGDACRVVWNTALEQRRQYRRRGAFIGYVEQARQMAEAKKDFPWLAEAPSHTLQQTLRDLERACKTHGTFKVRWRSKRKNAPTFRFPDPKQITVERISRRWGRVKLPKLGWTRFRWTRPLGGQLRNATVLKDGGRWYISFCVEDGLMESAPNGKPPVGVDRGVTVAVATSSGWMRDREFVTPGEAVRLKRLQQQLARQRKGSNRRAATRAKLTKLNARIRARRTDFLAWTANRLTCDHGLVVVEDLNIRNMTASAKGTLAEPGRNVAAKAGLNRAILAKGWGGLLTALEHKARYHGSRILRVPPAFTSQTCHACGHCAPDNRESQAEFRCRACGHQANADVNAAKNILAAGLAVTGRGDLAVGRSVKRQPPKVEAA		figs.1c and 2a
ISAs26	MQILKAYKFRLEPTEQQAQRLRQLGGCARYVWNHGLAETKRILDAGEKLPSAFELNRMLTSWKKDPEMAFLAEAYTDNLQQKLKDLHGAWMRCFDKKLAAKAPVFKKKSDNRDAIRFVNFDKYCRLEKGRVKLPAGLAWVKFRQSQPVEGKIKNATVSQAAGHWYISFQVEQETLEPIHPSGSMVGLDAGIAKLATLSDGTVFEPVNSFKTNQTKLARLQRQLSKKVKFSSNWKKQKAKIQRLHSHIANTRRDYLHKVTTTISKNHAMIVIEDLKVASMSKSAAGTTSQPGRNVRAKSGLNRSILDQGWFELRRQLEYKQAWRGGQVLAINPAYTSQQCACCGHTAKDNRQTQSQFKCAACGYEANADVNGARNILAAGHAVLACGGVVQSGRPMKQEP…		figs.1c and 2a
ISEc44	MLILKAYKFRLEPTHEQSQRLRQLCGCARFVWNLGLAETKRILGSGEKLPSAFELNRMITVWKKMPEYIFLQDAYTDNLQQKLKDLHTAWKRCFDKKLAAKAPVWKRKNEGRDSIRFVNFEKYCCLENRRVKLPSGLGWVKFRQSQRVNGKIKNATISQLAGQWYISFQVEIETAEPNHTSTTIVGLDAGVAKLATLSDGTVFEPVNSFQKNQKKLARLQRQLSRKVKFSNNWQKQKRKIQRLHSCIANIRRDYLHKVTTTVSKNHAMIVIEDLKVSNMSKSAAGTVSQPGRNVRAKSGLNRSILDQGWYEMRRQLEYKQLWRGGHVEAVNPAYTSQRCSCCGHTEKANRRTQSKFECKACGYAENADVNAARNILATWHAQMATSTAGHAETGSLSLG		figs.1c and 2a
ISSen6	MMLILKAYKFRLEPTPEQSQRLRQLCGCARFVWNLGLAETKRILGSGEKLPSAFELNRMLTVWKKMPGHIFLQDAYTDNLQQKLKDLHTAWKRCFDKKLAAKAPVWKRKNEGRDSIRFVNFEKYCRLENRRVKLPSGLGWVKFRQSQRVNGKIKNATISQLAGQWYISFQVEVETAEPNHTSTTIVGLDAGVTKLATLSDGTVYQPVNSFKASQRKLATLQRQLSRKVRFSSNWQKQKRKVQHLHSHIANIRRDYLHKVTSEISKNHAMIVIEDLKVSNMSKSAKGTAEQHGRNVKAKSGLNRSILDQGWYEMRRQLEYKQLWRGGQVLAVPPAYTSQRCACCGHTAKENRLSQSKFVCQACGYTANADVNGARNILAAGHAVLACGGMVQSGRPSETG…		figs.1c and 2a
ISEc41	MLIQKAYKYRLYPTDQQAQRLRQLCGCARFVWNYALNETLSIHDAGGKIPSAFDLNKRLTGWKKLPELAFLSEGYTDNLQQKLKDLRSAWDRCFDKSLTAEKPVFKKKTKGCDSIRFVNFSKYCGLDYGRVKLPSGLGWVKFRQSRKIEGVIKNCTISQHAGHWYVSFQVELAVTDPIHASTSAIGLDAGITKLATLSDGTVFEPVNSLKKNQDKLARLQRRLARMVKFSANWKKQKAKISRFHSHIANIRRDYLHKTTTTISKNHAMIVIEDLKVSNMSKSAAGTVDQPGRNVAAKSGLNRAILDQGWAEMRRQLEYKQAWRGGDVLAINPAYTSQKCACCGHTSKNNRRTQASFICTACGYTANADVNGARNILTAGFEVMAAGQILPSVRKGRARK…		figs.1c and 2a
ISKpn69	MLIQKAYKYRLNPTDAQAQRLRQMCGCARFVWNYALAETQRILEAGQKLPSAFELNKMLTGWKKLPDLAFLSDAYTDNLQQKLKDLHGAWIRCFDKKLAAKAPVFKRKTHGNDSVRFVNFDKYCQLEYRRVKLPSGLGWVTFRQSRAVVGKIKNATVSQHAGGWYISFQVEMEVEQPAHPSTSAVGLDAGICKLVTLSDGTVFEPVNSFKQNQSRLARLQRQLARKVKFSANWKKQKARISRLHSHIANIRRDYLHKVTTTISKNHAMIVIEDLKVSNMSKSAAGTVDEPGRNVAAKSGLNRAILDQGWYEMRRQLEYKQRWRGGEVLAVNPAYTSQKCARCGHTVKENRQSQAVFVCVACGYEANADINGAQNILAAGHAVLSGINPGRARKAA		figs.1c and 2a
ISMmu1	MLYNRSRKEANKMEHKKMADYAYHYGLKVRIYPSRQQKEMIRRNADAARCIYNEHVAVNKEIARFGRRSIYIDFIEKRIEALRERIRTVTALKDRYPWLRHPDIDAQSIANARQNYQHAWKQFRAVHHAGVPNFHKKTSVESYQTNPHYSKGTVISLFTSNARFLDKHHLMLPKLKRIRFQGSRKILDRLFAMKEVRIGTITITKDSLHRYFASFQLGSDEPFVKASPKTKAEIGIDLNIENFYADSNGEIVANPRYYRRQKRRLANAQRKLSRRIVRAKKEHRSLREAKNVEKQRLLVARLTAQVMQRRKDFLHRTSATLIKNHDLVAAEELRSKNLLKNHALAMSIQDNGWRMFLSMLTYKAALYGKNFVTVDPRNTTQTCHACGHIMSGKEKLTLK…		figs.1c and 2a
ISMma22	MLKVLRYRVYPTKAQKTTMNNTLELCRWTYNETLALRKDAWESEQKNIGYYDSKKMIPEWKKEKPELKTVHSQVLQEVIKRVDLAFQAFFRRVKTGEKAGYPRFRGYGRYDSFTYTQSGFSLDSDRLTLSKIGDIKIKLHRPVEGEIKRLNVRKMPTGKWFVSFLVETDTPLELQKTGLSVGVDVGIKSFLTLSDGNYVPNPRFFVTEEKFLAKVQRKLSKLEKGTPERAKALKAVQRVHERISNKREDFVQKVSLNLVRNYDLITFEDLNIKGMIKNHKLAKHIADVAWNKLVTITSYKAEWAGKRVELVNPCNTSQMCSGCGEIVKKELSERIHSCPYCGLTLDRDHNAAINIMRLGLQSLQNSGRCPSLQ		figs.1c and 2a
ISNsp2	MKTLKFKLYQHKRNRFLKRMINAGGAIYNHCIALHKRYYRMWGKHLNCAKLQAHIAKLRKRNPFWQTVGSQAVQDICQRIEKAYQLFFKHNKKGVRPPGFKKVKKYKSFTLKQAGYKFLDGNRVKIGSKIYQFWKSREIEGTVKTLTIKRTPLGELFMVVVVDEGNKPETKFMTGKIAGFDFGLKTFLTCSDGTTIESPQFFKQSLNAIKKASRQHSKKLKGSANREQARKNLVRRYEDIFNRRRDWFWKLAHELTDKFDVLCFETLNLKGMQRLWGRKISDLAFGELLQILEWVAKNKNKLVVFIDPWYPSSKTCSSCGHILENLDLSIRRWRCPSCQSENDRDGNASLNIKRVGSSTLGVGDVRQSQTAISV		figs.1c and 2a
ISNsp3	MKTLKFKLYQHKRNRFLKRMINASGVIYNHCIALHKRYYRMWGKHLSCAKLQAHIAKLRKRNPFWQTVGSQAVQDICQRIEKAYQLFFKHNKKGVRPPGFKKVKKYKSFTLKQAGYKFLGGNRVKIGNRVYQFWKSRQIEGTVKTLTIKRTPLGELFVVVVVDDGIKPEIEIKTGKIAGFDFGLKTFLTCSDGTKIDSPQFFKQSLNAITKASRQHSKKLKGSANRKRARLNLVRKYEDISNRRRDWFWKLAYELTDKFDVLCFETLNLKGMQRRWGRKISDLAFGEFLEILEWVAKKKNKLIVFIDQWYPSTKTCSHCGHVLESIDLSVRSWSCPSCQSVNERDENASKVICAVGASTVGLGDVRLATPAIAV		figs.1c and 2a
ISCbt1	MAKSKTSSYILTLKLKTEKYQEDILNKRLEISRNIYNSCLGEILKRYKHTRELKDYRKEYKNIIKMSKDKERSKKFNELNKKYDLTEYSLHTYVKPIQKHFKDNVDSFTAQKIATRVFNSFQKLMFHQAKRVYFKRYGELNSVEGKSNKTGIRFQDNSLIWNGLKIPVIIKTNDIYVQMSLENRVKYCRIIRRIVKGKIKFYVQLILEGIPPMKINKTTGEIKNKIGKGNVGIDIGTRTIAVSSENDVKLLELAPEIDNIENQKRILNRKLDRQRRANNPNKYNEDGTINRNNKDKWIKSNRYIKTQNKLKEIQRKQAEIRKQSHYRLINRLLLLGNRFLVETMNYKGLQARVKETTINEKTGRFNKKKRFGKSLANKAPSMFLTMLDNKLKWNNTQLF…		figs.1c and 2a
ISBth16	MTKQNKAYKFRLYPTKDQAHLMRKTFGCVRFVYNRMLAERKEAYEKHKDDKDQLKKQKLPTPAKYKAEFEWLKEVDSLALANAQLNLQTAYKNFFRGQNDFPTFKSKKDRKSYTTNVVNGNIILLNGHIKLPKLKMVRIKQHREIPQGHIIKSCTISMTPTGKYYVSILTEYEKEIVQKEVETVVGLDFAMDQLYVSSEDERANYPKFYREMLDRLAKAQRVLSRRTKGSGRWNKQRIRVAKLHEKVANQRKNFLHHKSKELATHFDVVAIEDLNMKGMSQALHFGKSVADNGWGMFTSFLAYKLHEQGKQLVKIDKWFPSTKTCSSCGNMKNMSLSERVYSCICGVNLDRDYNAAINIKNEAIRLLALV		figs.1c and 2a
ISCpe2	MIRKKAYKFRIYPTKKQAELINKTIGCCRFVFNYSLGVQKTKDNYWNIVEEMVQQGYFQENNWKGEFFNKANSIKDIAKLKKSYDWLKEVDSIALQASVENLDAGYDKYYKKTGSRPKFKSKKNEIQSYTTKLVKAKGNVNIEIVGKGIKLPKLGLVKIENSRNVDGNIKRVTVSRTQSGKYFASILCDVNIQELPKIDKKVGVDVGLKTFAVCSDGYEEANPKHFRKAEKRLIKLQRDLARKEYNSKNYHKNRIMIAKLHERIANQRMDFLQKFSTKLIRENQSIAIEDLRVSNMLKNHKLAKVISEASWSEFRRMLEYKAEWYGREIVIAPPDYASSQLCSECGYKNIEVKNLGLREWVCPECGTHHQRDLNASINLEKLIA		figs.1c and 2a
ISMac7	MMKAFKFRLYPTTTQADQLNQHIGSCRFVYNWALDQKIKTYEQTGKSISRFDLNKLIPALKTSNEWLGEVNSQSLQGMTKQVESAFTRFFREKNGFPKFKSKKNPIQSFPVPQHYSVNFENHTVKLPKIGEIKAVLHRKFDGELKTARVSRTCKGHYYISVLVEDGKELPEKQGFSESTTVGIDVGIKDFAVLSTGEKIENPKYLKNSLQRLKVLQKRVSRKQKGSKNRAKARQRLAVLHDKITNQRNDFQNKLSFRLVSENQAVALETLNVKGMVKNHHLAQAISDSAWSSFVTKLEYKAEWFGKGVLRIGQFEPSSKLCNVCGYHNKELQLKDREWTCPDCKTKHDRDINAAINIKKFALIDQNLIGL		figs.1c and 2a
ISAeme8	MTLRRATKVRIYPTDEQAAFLNAQFGAVRFAYNKALHIQRHMFKRHGISLKPKRDLKPMLAVAKKSRKYGWLKEYDSLALQQAVINLDKAFANFFNPKLKARMPTFKSKRGRQSSYHPNGKVLTAAIQLPKMTPIRAVIHRDIIGVVSSITVSRGPTGKYYASILCEDGCEAPAKPTFITDVTGCDMGLSHYLIESSGKKIANPRHLINASRNLRRKQKALSRKKKGSANRGKARRQLAALHERVANARADFQHKLSHTMVDENQAVIVETLKSANMMKNHKLARAIGDAGWHGFIMKLEYKAQAAGRHLIKLDQWFASSKLCSDCGHKMPDMPLHQRQWVCPACGAGHDRDINAAMNIQQQGILELKAAGHVVSTHGGQR		figs.1c and 2a
ISRor9	MHRATKVRIYPTQEQTELLEKQFGAVRFAYNKALYIRSHWYKKHGVSLNNAKHIQPLLPIAKKSRRYSWLKAADSNALQVSLQNLDRAFQNFFEKRAKYPKFKRKHGPQSSYHCSSLKITADTIKIPKISPIRANIHREIVGKVKSITISRAPTGKYYASILADDGQEAPAKPTYITQLTGYDIGLKDYLIRDDGKKTPNPRHLVNAYRRLRRDSKALSRKQKGSANRRKARIRLAAQHDRVANARNDFQHKLSRNIIVENQAVIVETLKTANMMKNKRLARHIGDAAWSGFVAKLAYKAEASGVHLVKLDQWFASSKTCHCCGHKMAEMPLKVREWQCPVCLTHHNRDINAAMNIRLKGITELMAAGHVVKAHGGLRKSVITTVAAYEVGSPAL		figs.1c and 2a
ISEc46	MLRATKVRIYPTPEQAEFINAQFGAVRFAYNKALHIKKHSYQRHRVNLNPRKDLKPLLAVAKKSRRYGWLKEYDSIALQQAVINLDVAFSNFFNPKLKAGKPTFKSKHGRQSSYHCVGIKVLDGAIKIPKILPIEARLHREITGMLKSITLSRSATGKYYASLLCDDGMEAPAKPALISNVTGLDMGLAHFVIKSDGNKIASPRHLINASRNLRRKQKALSRKKKGNANRRKARIQLAAVHERVASARADFQHKLSRAIVDENQAVIVETLKTANMMKNHHLARAIGDAGWSGFITKLEYKATEKGVHLVKLDQWFASSKTCHCCGHKMSEMPLHKRIWQCPECGVEHDRDINAALNIKRKGILELQAAGLVVSAHGGQHKSVTQTVAA		figs.1c and 2a
ISTel2	MKARYRYRFYPTDQQRQRLAQLFGCVRVVWNDALAICKQSDSLPKTSELQKLVITQGKKTPERQWLSDVSNVPLQQSVADLGVAYKNFFDSIKGRRKGKKINPPRFKKKTERQSARFTTYGFSIKGEEVYLAKIGNVRPIWSRKLPSKPSSVTVIKDAANRYFLSFVVEIDPVHQPASNPSIGIDLGIKAFATLSTGEKIDGPDYSKLDKKIRRKQRKLARQVKGSQRREKTRLQIAKLHSRISDIRRDFLHKVSTRVVIENQVITLEDLNVSGMVKNRKLARAISLQGWREFRVLVEAKCNKLNREFIVIDRWEPTSQTCSKCGFKWGKVDLSVRSVVCLNCGTEHDRDENAARNIEKVGIGHCHDYKWTQRGSKTTSVASPSEASRIIAL		figs.1c and 2a
ISCco1	MQITKGFKYRLYPNKEQSLKLSHQCFIYNQAYNICLNLQQEQWLKNKELDKKERTYLSATQIDNQVKLALKARNLEFKSVVAQQARINANRALEQAIKDKNKGFPKFKNSKLAKQSFNWNNQGYQILEFNDKFKIFRLMSMPIKMRYHRALPNNYKLNQITISKTHNKYFVSFSITYDEPSVVLMSSNKIDINRAVGIDMNINEIALSNGALLLTCSKSINKAKYSTTFKRLMRKQSKRVLKAKKDKIKLGSNFRKTQIRLNKIYERASNIKKDLAHKISNQIVKNFDLIVVENLKVKNMTKRAKLKNVKAKSGLNKSILDTSFYQFLSFVEYKAMHNGKVFTKIEPQYTSKACCKCGTIKENLTLKDRVFTCDNCGYVEHRDINASKNILDRGLKSFG…		figs.1c and 2a
ISBce3	MSQTITVKVKLLPTKEQIQLLEQSSYEYIKVINTLVSEMAEAKKSTKKSTKDVEANLPSAVKNQAIKDAKSVFSTKVKKSKYKVIPILKRPVCVWNNQNYSFDFTHISVPLMVNGKSTRLKVRALLTDKYNRNFNLLTHKLGTLRITKKSNKWIAQISVTIPTNEKTGTKILGVDLGLKVPAVAITDDEKVRFFGNGRQNKYMKRKFRSVRKKLGENKKLNAIRQLDDKEQRWMQDQDHKVSREIIDFATDNNISVIRLEQLTNIRQTARTSRKNEKNLHTWSFYRLAQFIEYKANLVGIKVEYVNPAYTSQTCPKCSEKNKAPDRKYKCRCGFEKHRDIVGAMNIRYATVIDGNSQSA		figs.1c and 2a
ISClte2	MCQLLVVLHFQQLNNILKIKKHHKGNDTVQLTIKIKLIPMKEQKLHIQDTCLEYIKTVNDIVSLMVAENKSLKLTSKDIIANLPSAVKNQAIRDSKSVYSKYKKTKIQNFLKKPMCIWNNQNYSIGENYIAFPVMINGKSKKIKVKAIIEQYQKDLLTNKLGTLRITKKANKLMAQISIDVVEKENVNNKAMGIDLGLKIPAVAVTEDKKVKFFGNGRQNKYIKRKYRSLRKKLGKAKKINKIKSINDKEQRYMKDQDHKISRGIVNFAIQNNISVIRLEKLTNIRNTAKTNRKNEKNLHTWSFYRLAQYIEYKALLEGIKIEYVNPCNTSKQCPICGKLNTAKDRKYQCSCGYKAHRDLNACINIINATVVDGNSLQA		figs.1c and 2a
SisTnpB	MWRAKEKNDKTQLSFKYKIYPTREVEEKLIKVMQIEAKVYNALLDVINNARKEGKKITPKDTQNMLKELKIEGKELVYSKALQMVNNQLWSNINALHELKKKGKKVGKLRYKKILKIINYNQSGFKVEGDKLILSKIGEIKVLFHRPLEGEIKGVIIKKSSTGWYAIFQVEVEKKPLEKAGKVVGIDLGVDKLVTTSDGVVIENPKVFDKVERRIKILQKSLSRKKKGSRNYEKVRKKLAKLHEHVKNLMSDYIHKVTSWLVEEYDEIYVEDLDVKDIVEDSESKVLRKHILHSDFSKFVSYLSYKAERAGRRVVKVDPRNTSKTCARCGYVKKDLALADRVFVCPECGWTVDRDYNASLNILRAGSGLPLEPVDRGPLLYIPFSEGVYSKFLGRSRKS…		figs.1c and 2a
TnpBs	TAM(5'→3')	reRNA(5'→3')	figure
ISLde4	AAGGG	GAAGCATGGCGAATTCTTTGACTGTGCGTATGATAAAAGCATCAGAAGCTAGGGCTCCCCCTAGTGGAGGTGCATACAACCGAACGCACAAGGCATTTCCTCGTGAAAAAGCCTAAAAAAATCCTCTAGCTTCGGCTAGAGGACAAGAATGTGTTTATTGCTATTCACCTGAATAGCATTGGATATGTTTTTGAATTCGG	figs.1b
ISLde5	AAAAG	GGCAGATAAAAAGCTATTGGATAAATGCCATTTGGCGTTATTTGACAGCCAACCGTACTCACTGACCTTAACTTCAAAAGGTTAAAAATCTGATTTCTTTTGCCAAGTTGAATCTACTCATAGATTTAACTAGAAAGGAATATCAGAAAAACTTACCAATATTGATGTGATTATCAAGATTTAGTAAGTTTTATGATTCGG	figs.1b
ISLde6	TTGAT	GGCGAAACGGAACAATCGTCCTTAGCACTAGACGGTGTTATCTGCGTAATCTTCTGAGCGAGTCAAAACGAAGACGAGATGACATTGGGCAGTTGTGAAACTAACCTAAACACTCTGAGTACTTCTAAGAGTTGTCGATCTTACGTGTAATGTGTTGGGTGGCCCCCAGATTCCTGCGACTTTAGTCGTAGGAGGTTCAA	figs.1b
ISLag3	TTCAT	TCCAACTATTGGGTACGCAATATATTAGTGGGCAAGAACAACCTAAATTTGAATTAACAACTAATGCGTAAACGTGTTAGTTAAGTGGGTGCTGTCAACCACCCAATGATGTAGCCACGTATAGTGTGGAAGCAATTAATTGCGTTATGACCACTGACCGTAAGGTCGTGAGCTACAAGCCTCTCACTTTAGTGAGGGGTAGTTGA	figs.1b
ISLhe6	ATATA	GCGTCCACTTGACAAACGAAAATAGCTTGGCGACTGGCTTTAGCTGGGTTGACGCTGTTGTAAAGTTGTCCTTATAGCTTCGGTTATTATCATAGATAAACGGAGTGTTTTAAAAAGGTTAACGGCAGATATTGGCTAAAAAAAGTTGCATTCTTAGGAAAATAGGGTCATTTGAAGCAAAATGACTGTATTGACCTAATATTTTCTAACAT	figs.1b
ISLam	TTTAA	AAAGGCTGCAGTCCGTTAGCAACTTGCGGACTTAAAAGGCTTTGGTAATTAGACGACCTCTATCGGCAATAGTCAAAAGACTATTGCTGGTAAGTCAAGTCCGTATCTAAGCAAGTTGGTGTTCTGGTTAGCGCAAGCTAACGAGCCACTAAGCCCTAGACTTCAGTCTAGGGTAGTTGAC	figs.1b
ISLfe4	TTTAA	TAGCTAAACTAGCCTAGCTTATCTGTCCCTATGGCAACCTGGGGACATAAAAGGCGTTGGTAATTAGACGACCGCTATTTGATTACAATTTCAGTTAGTCAAATAAGTTGTCCCTATCTACGCAAATTGTGGTTCGAAATCCGTGATGATATTCGGCTCACAAGCCACTGACTTTAGTCAGTGGTGGTTGAC	figs.1b
ISLru3	TTCAT	CACGCAATATGTTAGTGGCAATGAACGCCCGTCTTTCAACAAATTAACAGCCGGTGAGTAAATCTCGTTGGCTAAACGGGTGTGTCGTCAACCACCCGATGATGTAGCCACATCGTGAAGAAGCACATTAGTGCGTTACTACTTCTAAGCCGTTAGGCTTGTGAGCTACAAGCCATCGATTTTAATCGGTGGTAGTTGAC	figs.1b
ISLhe7	TTTTT	GTCAAACCAAGCATGATCGAGATATTAATGCGGCAGTTAATATCTTGCATAAAGGAAGTACAAAGCTAAATGGTCAGGGACTGGCCATGGTAACAAGCTGAGTTCCGTGAGTTAGGTATTTGACTAGTTCAATGTAAGATCCTAAACACTACTCAGTGTTCCCAGAAACCCGTCACTTTAGTGCCGGTGTAGTTCAT	figs.1b
ISLeq	TTCAT	CCAACTTATCAAAAATTAGTCTAGTGTATAAATTATGCTAGACCGCCGTACCTATCAACGTGCGGAAACGTCTTTTGACGTTTGAGAAGCAACAGCGTAAAAGACTTTTAGCCTTTGGTTGTGGGAGAGTTTATTTACTCGCTTGTACCACGACTAGTTAGTTGCAAACCTGGGAATTTATTCCCAGGTAGTTGATT	figs.1b
ISLag4	GGAGG	TGCTTTACTGTAAAAATAAACGGGGTGGGCTACACCCTTAAGCTACAAGAGTCAGTCACTGTCATTACCCCCTAGTTGGGATATGGGAATACTGGTGTTGACGGTAGTAAATAAAATTAAGAAAGGAAGGCTATATTCTTTCTGATAATGTAGAAGAAGCTACACGCTTTTCTATGTTATTCTACATTTTATATAGCAGG	figs.1b
ISLre3	TTTAT	GATATTAACGCTGCACAAGTCATCTTGCAAAAAGGATTAGCTATCCGATAGATAAAGTTAGGCTCGGGACGAGCCTTGGCTAATAGTCGTAACCTCTGCTTGAAGGTTCGTTCAGAATCGGTAGGGTAAGTATGCGATGTTTCCAGAATCTCCCACTTCAAGCATTAAACCGTAGGTTTAGCTAAGTGGGAGTAGTTCAA	figs.1b

## Sheet: figs.3
figs.3
Cleavage substrates	NTS sequence(5'→3')	TS sequence(5'→3')	figure
ISLde6 cleavage dsDNA substrate, without TAM but with target	NTS-5'6-FAM-TCTGCAAGGTAGCGCaactagatgaatattaaggacaatcACtTaCACAATCTAGATGC	GCATCTAGATTGTGtAaGTgattgtccttaatattcatctagttGCGCTACCTTGCAGA	figs.3a
ISLde6 cleavage dsDNA substrate, without TAM but with target	TCTGCAAGGTAGCGCaactagatgaatattaaggacaatcACtTaCACAATCTAGATGC	TS-5'6-FAM-GCATCTAGATTGTGtAaGTgattgtccttaatattcatctagttGCGCTACCTTGCAGA	figs.3a
ISLde6 cleavage dsDNA substrate, with TAM and target	NTS-5'6-FAM-TCTGCAAGGTAGCGCTTGATgatgaatattaaggacaatcACtTaCACAATCTAGATGC	GCATCTAGATTGTGtAaGTgattgtccttaatattcatcATCAAGCGCTACCTTGCAGA	figs.3a
ISLde6 cleavage dsDNA substrate, with TAM and target	TCTGCAAGGTAGCGCTTGATgatgaatattaaggacaatcACtTaCACAATCTAGATGC	TS-5'6-FAM-GCATCTAGATTGTGtAaGTgattgtccttaatattcatcATCAAGCGCTACCTTGCAGA	figs.3a
ISLam cleavage dsDNA substrate, without TAM but with target	NTS-5'6-FAM-TCTGCAAGGTAGCGCaaattgatgaatattaaggacaatcACtTaCACAATCTAGATGC	GCATCTAGATTGTGtAaGTgattgtccttaatattcatcaatttGCGCTACCTTGCAGA	figs.3b
ISLam cleavage dsDNA substrate, without TAM but with target	TCTGCAAGGTAGCGCaaattgatgaatattaaggacaatcACtTaCACAATCTAGATGC	TS-5'6-FAM-GCATCTAGATTGTGtAaGTgattgtccttaatattcatcaatttGCGCTACCTTGCAGA	figs.3b
ISLam cleavage dsDNA substrate, with TAM and target	NTS-5'6-FAM-TCTGCAAGGTAGCGCtttaagatgaatattaaggacaatcACtTaCACAATCTAGATGC	GCATCTAGATTGTGtAaGTgattgtccttaatattcatcttaaaGCGCTACCTTGCAGA	figs.3b
ISLam cleavage dsDNA substrate, with TAM and target	TCTGCAAGGTAGCGCtttaagatgaatattaaggacaatcACtTaCACAATCTAGATGC	TS-5'6-FAM-GCATCTAGATTGTGtAaGTgattgtccttaatattcatcttaaaGCGCTACCTTGCAGA	figs.3b
Cleavage substrates	sequence(5'→3')	figure
ISLde6 cleavage dsDNA substrate	GACGCTCAGTGGAACGAAAACTCACGTTAAGGGATTTTGGTCATGAGATTATCAAAAAGGATCTTCACCTAGATCCTTTTAAATTAAAAATGAAGTTTTAAATCAATCTAAAGTATATATGAGTAAACTTGGTCTGACAGTTACCAATGCTTAATCAGTGAGGCACCTATCTCAGCGATCTGTCTATTTCGTTCATCCATAGTTGCCTGACTCCCCGTCGTGTAGATAACTACGATACGGGAGGGCTTACCATCTGGCCCCAGTGCTGCAATGATACCGCGAGACCCACGCTCACCGGCTCCAGATTTATCAGCAATAAACCAGCCAGCCGGAAGGGCCGAGCGCAGAAGTGGTCCTGCAACTTTATCCGCCTCCATCCAGTCTATTAATTGTTGCCGG…	figs.3c
ISLam cleavage dsDNA substrate	GACGCTCAGTGGAACGAAAACTCACGTTAAGGGATTTTGGTCATGAGATTATCAAAAAGGATCTTCACCTAGATCCTTTTAAATTAAAAATGAAGTTTTAAATCAATCTAAAGTATATATGAGTAAACTTGGTCTGACAGTTACCAATGCTTAATCAGTGAGGCACCTATCTCAGCGATCTGTCTATTTCGTTCATCCATAGTTGCCTGACTCCCCGTCGTGTAGATAACTACGATACGGGAGGGCTTACCATCTGGCCCCAGTGCTGCAATGATACCGCGAGACCCACGCTCACCGGCTCCAGATTTATCAGCAATAAACCAGCCAGCCGGAAGGGCCGAGCGCAGAAGTGGTCCTGCAACTTTATCCGCCTCCATCCAGTCTATTAATTGTTGCCGG…	figs.3d

## Sheet: figs.6
plasmids	description	protein sequence	guide sequence(5'→3')	Figure
pSMC-SpCas9-NTS4	SpCas9-mediated integration plasmid for the integration of β-carotene metabolic pathway in S. cerevisiae M, using the guide NTS-T1	MPPKKKRKVDKKYSIGLDIGTNSVGWAVITDEYKVPSKKFKVLGNTDRHSIKKNLIGALLFDSGETAEATRLKRTARRRYTRRKNRICYLQEIFSNEMAKVDDSFFHRLEESFLVEEDKKHERHPIFGNIVDEVAYHEKYPTIYHLRKKLVDSTDKADLRLIYLALAHMIKFRGHFLIEGDLNPDNSDVDKLFIQLVQTYNQLFEENPINASGVDAKAILSARLSKSRRLENLIAQLPGEKKNGLFGNLIALSLGLTPNFKSNFDLAEDAKLQLSKDTYDDDLDNLLAQIGDQYADLFLAAKNLSDAILLSDILRVNTEITKAPLSASMIKRYDEHHQDLTLLKALVRQQLPEKYKEIFFDQSKNGYAGYIDGGASQEEFYKFIKPILEKMDGTEELLV…	GATGATGGCAAGTTCCAGAG	figs.6
pSMC-FIRE-TnpB-NTS4	Fusion protein FIRE-TnpB-mediated integration plasmid for the integration of β-carotene metabolic pathway in S. cerevisiae M, using the guide NTS-T3	MPPKKKRKVVSNEEKYFFTRQYHVLLTDKQKIQHEKALKTQNALFQYALKYLFKTYGVKHIGRPMPFSQKPIQYVLNKIKTGFIKDKYGLARWKKSVLFLSSHSADEFLKTVYTNFSQYRKRLVKADKSMDEKARYNFKMNVTKDKYGKHKNQLHKSWYRKGSINFLRNGASFRTITSQKLPEDSKGGIRIEDKHTDNHTFLTVADFGTVEVIEDLSELNLKDIALTKIKKLPDGSYRLQLTFSLPRKKQKSKTIQGFDWNMAGNEAFCSSDGKRIKVSDAAIKRADEYEQKINAIKSARDLEGNAHGQSKLYRKLDRRQQKLNAKRSNMLTNEYRHLVHEVVDDCDTIVVEKLDAYRMRKRGKGSAQRKGINRRLAVLKPYELMTILESLVKKQNKRF…	GATGGCAAGTTCCAGAGAGG	figs.6
donor used for S. cerevisiae editing	description	sequence(5'→3')	Figure
donor used for β-carotene synthetic pathway integration	designed for β-carotene synthetic pathway integration in S. cerevisiae M, consist of three fragement: L arm+pTEF-crtE-terminator-pTDH3；pTDH3-crtI-terminator-pPGK；pPGK-crtYB-terminator-R arm	TGCCTGCCACCATCCATTTGTCTTTTGCACCATATCTTCATAACCTGTCACCTTGAAACTACCTCTGCATGCCACCTACCGACCAACTTTCATGTTCTGTTTCGACCTACCTCTTGTAAATGACAAATCACCTTTTTCATCGTATGCACCTTATTCTCCACATCACAATGCACTATTGCTTTTGCTTTTTCACCTGTCATATCCTATTGCTATTAGATGAAATATAATAAAAATTGTCCTCCACCCATAACACCTCTCACTCCCACCTACTGAACATGTCTGGACCCTGCCCTCATATCACCTGCGTTTCCGTTAAACTATCGGTTGCGGCCATATCTACCAGAAAGCACCGTTTCCCGTCCGATCAACTGTAGTTAAGCTGGTAAGAGCCTGACCGAG…	figs.6
note：red represents NLS (Nuclear Localization Signal), green is sso7d, blue is T5, underlined part is ISLde6, orange is EXOIII, and black is linker.
